# Supplementary material for: The relationship of household assets and amenities with child health outcomes: An exploratory cross-sectional study in India 2015–2016
Source: PubMed Central journal article supplement — SSM Popul Health. 2019 Nov 7;10:100513. doi: 10.1016/j.ssmph.2019.100513 (PMC6881648; doi:10.1016/j.ssmph.2019.100513), 2019-11-07
Supplement: mmc2.pdf [file mmc2.pdf]

# Supplementary material: **Appendix**

## SSM – Population Health

### **The relationship of household assets and amenities with child health outcomes: an exploratory cross-sectional study in India 2015–2016**

#### **Authors**

Omar Karlsson, Ph.D.<sup>1,2\*</sup>, Rockli Kim, Sc.D.<sup>3</sup>, William Joe, Ph.D.<sup>4</sup>, SV Subramanian, Ph.D.<sup>3,5</sup>

#### **Affiliations**

<sup>1</sup> Takemi Program in International Health, Harvard T.H. Chan School of Public Health, 677 Huntington Avenue, Boston MA 02115, United States

<sup>2</sup> Centre for Economic Demography, Lund University, P.O. Box 7083, 220 07 Lund, Sweden

<sup>3</sup> Harvard Center for Population and Development Studies, Harvard T.H. Chan School of Public Health, 9 Bow Street, Cambridge MA 02138, United States

<sup>4</sup> Population Research Centre, Institute of Economic Growth, Delhi University North Campus, Delhi 110007, India

<sup>5</sup> Department of Social and Behavioral Sciences, Harvard T.H. Chan School of Public Health, 665 Huntington Avenue, Boston MA 02115, United States

#### **Corresponding author**

Omar Karlsson (okarlsson@hsph.harvard.edu), Takemi Program in International Health, Harvard T.H. Chan School of Public Health, 677 Huntington Avenue, Boston MA 02115, United States

|                                                                                                                                                                                                         |    |
|---------------------------------------------------------------------------------------------------------------------------------------------------------------------------------------------------------|----|
| Table A1. Results from conditional Poisson regressions. Each wealth index item entered separately including sex and age as control variables. ....                                                      | 1  |
| Table A2. Results from conditional Poisson regressions. Each wealth index item entered separately including a full set of control variables. ....                                                       | 9  |
| Table A3. Results from conditional Poisson models. District fixed effects instead of PSU fixed effects. ....                                                                                            | 17 |
| Table A4. Results from Poisson regressions. Excluding fixed effects. ....                                                                                                                               | 27 |
| Table A5. Results from conditional logit regressions. ....                                                                                                                                              | 37 |
| Table A6. Results for height-for-age (z-score), weight-for-age (z-score), weight-for-age (z-score), hemoglobin level (g/dl), and birth weight (grams) from fixed effects linear regression models. .... | 47 |
| Table A7. Results from conditional Poisson models. Missing outcomes and covariates imputed. District fixed effects. ....                                                                                | 57 |
| Table A8. Variance inflation factor (VIF) for independent variables used in table 4. ....                                                                                                               | 67 |
| Table A9. Results from conditional Poisson models. Full output for table 4. ....                                                                                                                        | 72 |

Table A1. Results from conditional Poisson regressions. Each wealth index item entered separately including sex and age as control variables.

|                                       | <u>Stunting</u>            | <u>Underweight</u>         | <u>Wasting</u>             | <u>Anemia</u>              | <u>Diarrhea</u>            | <u>Low birth weight</u>    | <u>Mortality</u>           | <u>Proportion (households)</u> |
|---------------------------------------|----------------------------|----------------------------|----------------------------|----------------------------|----------------------------|----------------------------|----------------------------|--------------------------------|
| <b>a) Water and toilet facilities</b> |                            |                            |                            |                            |                            |                            |                            |                                |
| Water pump                            | 0.816***<br>[0.799, 0.834] | 0.821***<br>[0.802, 0.840] | 0.924***<br>[0.895, 0.953] | 0.953***<br>[0.941, 0.966] | 0.930***<br>[0.889, 0.974] | 0.859***<br>[0.829, 0.891] | 0.846***<br>[0.788, 0.907] | 0.172<br>[0.169, 0.176]        |
| Toilet: no facility/bush/field        | RC                         | 0.389<br>[0.383, 0.395]        |
| Toilet: flush to piped sewer system   | 0.711***<br>[0.678, 0.745] | 0.737***<br>[0.700, 0.775] | 0.883***<br>[0.831, 0.940] | 0.921***<br>[0.897, 0.946] | 0.904**<br>[0.817, 0.999]  | 0.827***<br>[0.771, 0.886] | 0.590***<br>[0.486, 0.717] | 0.078<br>[0.074, 0.083]        |
| Toilet: composting toilet             | 0.880<br>[0.676, 1.146]    | 0.888<br>[0.679, 1.161]    | 1.029<br>[0.698, 1.517]    | 0.939<br>[0.789, 1.117]    | 1.327<br>[0.714, 2.466]    | 0.741<br>[0.428, 1.280]    | 0.372<br>[0.082, 1.691]    | 0.001<br>[0.001, 0.001]        |
| Toilet: dry toilet                    | 0.753***<br>[0.630, 0.899] | 0.771***<br>[0.634, 0.938] | 0.868<br>[0.675, 1.117]    | 0.873***<br>[0.787, 0.968] | 0.902<br>[0.589, 1.381]    | 1.375**<br>[1.052, 1.799]  | 1.116<br>[0.701, 1.776]    | 0.004<br>[0.003, 0.004]        |
| Toilet: other                         | 0.779*<br>[0.579, 1.048]   | 0.780*<br>[0.587, 1.037]   | 0.748<br>[0.515, 1.085]    | 1.011<br>[0.876, 1.167]    | 0.452<br>[0.172, 1.189]    | 0.674<br>[0.376, 1.206]    | 0.113**<br>[0.015, 0.835]  | 0.001<br>[0.001, 0.001]        |
| Toilet: sh. Flush to piped sewer s.   | 1.001<br>[0.930, 1.077]    | 0.886***<br>[0.822, 0.955] | 0.838***<br>[0.748, 0.938] | 0.984<br>[0.943, 1.026]    | 0.870<br>[0.731, 1.036]    | 0.918<br>[0.817, 1.031]    | 0.931<br>[0.711, 1.220]    | 0.012<br>[0.010, 0.013]        |
| Toilet: shared flush to septic tank   | 0.819***<br>[0.791, 0.848] | 0.815***<br>[0.786, 0.846] | 0.907***<br>[0.860, 0.956] | 0.947***<br>[0.928, 0.967] | 1.091**<br>[1.016, 1.172]  | 1.010<br>[0.953, 1.070]    | 0.934<br>[0.831, 1.049]    | 0.054<br>[0.052, 0.057]        |
| Toilet: shared flush to pit latrine   | 0.848***<br>[0.796, 0.902] | 0.856***<br>[0.800, 0.914] | 0.900**<br>[0.818, 0.990]  | 0.954**<br>[0.917, 0.992]  | 1.072<br>[0.923, 1.244]    | 0.852***<br>[0.766, 0.948] | 1.000<br>[0.810, 1.234]    | 0.014<br>[0.013, 0.015]        |
| Toilet: sh. Flush to somewhere else   | 0.529***<br>[0.438, 0.638] | 0.792***<br>[0.697, 0.900] | 1.392***<br>[1.179, 1.644] | 1.041<br>[0.969, 1.120]    | 1.392**<br>[1.035, 1.871]  | 1.605***<br>[1.425, 1.809] | 1.637*<br>[0.914, 2.932]   | 0.004<br>[0.003, 0.005]        |
| Toilet: sh. Flush don't know where    | 1.182<br>[0.944, 1.481]    | 1.243*<br>[0.975, 1.584]   | 1.327**<br>[1.049, 1.679]  | 1.184<br>[0.963, 1.456]    | 0.174<br>[0.017, 1.827]    | 1.117<br>[0.662, 1.886]    | 2.498**<br>[1.101, 5.669]  | 0.000<br>[0.000, 0.000]        |
| Toilet: sh. Ventilated improved pit   | 0.773**<br>[0.617, 0.968]  | 0.663***<br>[0.508, 0.867] | 0.643**<br>[0.446, 0.925]  | 1.037<br>[0.904, 1.189]    | 0.874<br>[0.500, 1.528]    | 1.357*<br>[0.946, 1.947]   | 1.006<br>[0.427, 2.370]    | 0.001<br>[0.001, 0.002]        |
| Toilet: shared pit latrine w/ slab    | 0.892***<br>[0.824, 0.965] | 1.002<br>[0.927, 1.083]    | 0.959<br>[0.853, 1.078]    | 0.978<br>[0.930, 1.029]    | 1.085<br>[0.869, 1.355]    | 1.023<br>[0.899, 1.163]    | 0.886<br>[0.675, 1.164]    | 0.009<br>[0.009, 0.010]        |
| Toilet: flush to septic tank          | 0.733***<br>[0.717, 0.750] | 0.727***<br>[0.710, 0.745] | 0.881***<br>[0.853, 0.909] | 0.896***<br>[0.884, 0.909] | 0.942**<br>[0.898, 0.988]  | 0.859***<br>[0.828, 0.891] | 0.738***<br>[0.683, 0.797] | 0.287<br>[0.283, 0.292]        |
| Toilet: sh. Pit w/o slab/open pit     | 0.992<br>[0.845, 1.163]    | 1.099<br>[0.927, 1.304]    | 1.184<br>[0.908, 1.545]    | 1.061<br>[0.928, 1.212]    | 1.724***<br>[1.162, 2.558] | 1.030<br>[0.754, 1.406]    | 0.769<br>[0.414, 1.430]    | 0.003<br>[0.003, 0.003]        |
| Toilet: shared composting toilet      | 0.792<br>[0.576, 1.090]    | 0.884<br>[0.634, 1.233]    | 0.358**<br>[0.132, 0.974]  | 0.651**<br>[0.462, 0.917]  | 0.256<br>[0.014, 4.657]    | 0.294***<br>[0.118, 0.733] | 1.011<br>[0.186, 5.486]    | 0.000<br>[0.000, 0.001]        |
| Toilet: shared dry toilet             | 0.898                      | 0.991                      | 0.920                      | 1.023                      | 0.616                      | 0.416***                   | 1.178                      | 0.001                          |

|                                   |                |                |                |                |                |                |                |                |
|-----------------------------------|----------------|----------------|----------------|----------------|----------------|----------------|----------------|----------------|
|                                   | [0.690, 1.168] | [0.727, 1.352] | [0.552, 1.532] | [0.884, 1.184] | [0.267, 1.417] | [0.260, 0.667] | [0.441, 3.151] | [0.001, 0.001] |
| Toilet: shared other              | 0.863          | 0.999          | 1.325***       | 1.096**        | 0.752          | 1.677***       | 1.090          | 0.002          |
|                                   | [0.665, 1.120] | [0.809, 1.232] | [1.073, 1.637] | [1.005, 1.195] | [0.385, 1.468] | [1.193, 2.359] | [0.583, 2.037] | [0.001, 0.002] |
| Toilet: flush to pit latrine      | 0.825***       | 0.831***       | 0.884***       | 0.911***       | 0.987          | 0.861***       | 0.807***       | 0.072          |
|                                   | [0.796, 0.856] | [0.799, 0.863] | [0.839, 0.931] | [0.891, 0.932] | [0.907, 1.073] | [0.811, 0.914] | [0.710, 0.916] | [0.070, 0.074] |
| Toilet: flush to somewhere else   | 0.769***       | 0.857***       | 0.781***       | 0.962          | 0.719**        | 0.782***       | 0.795          | 0.009          |
|                                   | [0.696, 0.850] | [0.778, 0.945] | [0.687, 0.888] | [0.904, 1.024] | [0.536, 0.964] | [0.671, 0.912] | [0.573, 1.104] | [0.008, 0.010] |
| Toilet: flush don't know where    | 1.030          | 0.638***       | 0.854          | 1.015          | 1.590          | 1.013          | 0.739          | 0.001          |
|                                   | [0.782, 1.357] | [0.460, 0.884] | [0.573, 1.274] | [0.877, 1.174] | [0.850, 2.975] | [0.677, 1.515] | [0.304, 1.796] | [0.001, 0.001] |
| Toilet: ventilated improved pit   | 0.787***       | 0.734***       | 0.713***       | 0.900**        | 0.950          | 0.873          | 1.366**        | 0.006          |
|                                   | [0.695, 0.891] | [0.644, 0.838] | [0.594, 0.856] | [0.829, 0.978] | [0.728, 1.241] | [0.725, 1.052] | [1.007, 1.853] | [0.005, 0.006] |
| Toilet: pit latrine with slab     | 0.813***       | 0.781***       | 0.842***       | 0.912***       | 1.039          | 0.922**        | 0.906          | 0.039          |
|                                   | [0.773, 0.855] | [0.740, 0.823] | [0.782, 0.906] | [0.883, 0.941] | [0.920, 1.173] | [0.852, 0.997] | [0.764, 1.076] | [0.038, 0.041] |
| Toilet: pit without slab/open pit | 0.897**        | 0.895**        | 1.015          | 0.930*         | 1.240*         | 0.959          | 0.897          | 0.011          |
|                                   | [0.815, 0.988] | [0.808, 0.991] | [0.888, 1.159] | [0.862, 1.003] | [0.986, 1.560] | [0.824, 1.117] | [0.644, 1.251] | [0.011, 0.012] |
| Water: tube well or borehole      | RC             | 0.392          |
|                                   |                |                |                |                |                |                |                | [0.386, 0.399] |
| Water: piped into dwelling        | 0.893***       | 0.904***       | 0.937***       | 0.969***       | 0.969          | 0.989          | 0.728***       | 0.166          |
|                                   | [0.862, 0.925] | [0.872, 0.938] | [0.891, 0.984] | [0.949, 0.989] | [0.894, 1.049] | [0.935, 1.046] | [0.639, 0.830] | [0.161, 0.171] |
| Water: rainwater                  | 1.105          | 0.956          | 0.810          | 0.856          | 1.192          | 0.936          | 0.958          | 0.002          |
|                                   | [0.841, 1.451] | [0.711, 1.285] | [0.520, 1.261] | [0.698, 1.050] | [0.566, 2.513] | [0.561, 1.564] | [0.340, 2.698] | [0.001, 0.002] |
| Water: tanker truck               | 1.031          | 0.914**        | 0.953          | 0.953*         | 1.141          | 0.884**        | 1.090          | 0.013          |
|                                   | [0.948, 1.121] | [0.837, 0.999] | [0.839, 1.083] | [0.906, 1.002] | [0.930, 1.400] | [0.783, 0.998] | [0.840, 1.415] | [0.011, 0.016] |
| Water: cart with small tank       | 0.706***       | 0.890          | 1.212          | 0.805***       | 0.848          | 0.778          | 1.223          | 0.002          |
|                                   | [0.553, 0.902] | [0.678, 1.167] | [0.890, 1.650] | [0.713, 0.909] | [0.532, 1.351] | [0.558, 1.083] | [0.675, 2.218] | [0.001, 0.002] |
| Water: bottled water              | 0.840***       | 0.787***       | 0.839***       | 0.942***       | 1.133**        | 0.866***       | 0.788**        | 0.031          |
|                                   | [0.796, 0.886] | [0.742, 0.834] | [0.776, 0.907] | [0.912, 0.972] | [1.017, 1.262] | [0.799, 0.939] | [0.636, 0.977] | [0.029, 0.033] |
| Water: community RO plant         | 0.894*         | 0.789***       | 0.949          | 0.895***       | 1.336**        | 0.903          | 0.836          | 0.005          |
|                                   | [0.787, 1.016] | [0.681, 0.912] | [0.797, 1.130] | [0.829, 0.966] | [1.053, 1.693] | [0.750, 1.087] | [0.573, 1.220] | [0.005, 0.006] |
| Water: other                      | 1.000          | 0.964          | 0.907          | 1.069          | 1.689***       | 0.858          | 0.963          | 0.002          |
|                                   | [0.809, 1.236] | [0.791, 1.175] | [0.634, 1.298] | [0.935, 1.222] | [1.144, 2.495] | [0.567, 1.297] | [0.530, 1.751] | [0.001, 0.002] |
| Water: piped to yard/plot         | 0.997          | 0.974          | 0.939***       | 0.962***       | 1.029          | 1.024          | 0.912          | 0.136          |
|                                   | [0.965, 1.031] | [0.942, 1.008] | [0.896, 0.983] | [0.943, 0.983] | [0.954, 1.110] | [0.971, 1.080] | [0.808, 1.029] | [0.132, 0.139] |
| Water: public tap/standpipe       | 1.060***       | 1.039**        | 1.036          | 1.008          | 1.079**        | 1.031          | 1.097*         | 0.159          |
|                                   | [1.030, 1.091] | [1.009, 1.071] | [0.992, 1.081] | [0.990, 1.027] | [1.005, 1.159] | [0.981, 1.084] | [0.991, 1.214] | [0.155, 0.163] |
| Water: protected well             | 0.994          | 0.994          | 0.972          | 1.038*         | 1.014          | 1.111**        | 0.937          | 0.037          |

|                                        |                            |                             |                            |                            |                            |                            |                            |                         |
|----------------------------------------|----------------------------|-----------------------------|----------------------------|----------------------------|----------------------------|----------------------------|----------------------------|-------------------------|
| Water: unprotected well                | [0.934, 1.057]<br>0.996    | [0.934, 1.059]<br>1.005     | [0.894, 1.056]<br>1.052*   | [0.999, 1.079]<br>1.005    | [0.865, 1.188]<br>0.945    | [1.012, 1.220]<br>1.053    | [0.722, 1.215]<br>0.938    | [0.034, 0.039]<br>0.042 |
| Water: protected spring                | [0.958, 1.037]<br>0.883    | [0.965, 1.047]<br>0.921     | [0.991, 1.117]<br>1.040    | [0.978, 1.032]<br>0.977    | [0.847, 1.055]<br>1.164    | [0.976, 1.135]<br>1.020    | [0.813, 1.082]<br>0.661    | [0.041, 0.044]<br>0.003 |
| Water: unprotected spring              | [0.664, 1.176]<br>0.969    | [0.698, 1.217]<br>0.930     | [0.746, 1.448]<br>0.894    | [0.824, 1.158]<br>0.966    | [0.650, 2.084]<br>0.912    | [0.728, 1.431]<br>1.125    | [0.208, 2.105]<br>0.876    | [0.003, 0.004]<br>0.004 |
| Water: river/dam/lake/ponds etc.       | [0.823, 1.141]<br>1.001    | [0.791, 1.093]<br>0.978     | [0.705, 1.133]<br>1.099    | [0.866, 1.077]<br>0.966    | [0.586, 1.420]<br>1.030    | [0.889, 1.422]<br>1.038    | [0.421, 1.819]<br>1.044    | [0.004, 0.004]<br>0.007 |
|                                        | [0.866, 1.157]<br>0.996    | [0.843, 1.135]<br>1.005     | [0.898, 1.343]<br>1.052*   | [0.875, 1.067]<br>1.005    | [0.693, 1.531]<br>0.945    | [0.818, 1.317]<br>1.053    | [0.618, 1.765]<br>0.938    | [0.006, 0.007]<br>0.042 |
| <b>b) Food storage and preparation</b> |                            |                             |                            |                            |                            |                            |                            |                         |
| Refrigerator                           | 0.732***<br>[0.715, 0.749] | 0.716***<br>[0.699, 0.734]  | 0.847***<br>[0.821, 0.873] | 0.917***<br>[0.905, 0.929] | 0.951**<br>[0.908, 0.996]  | 0.858***<br>[0.830, 0.886] | 0.709***<br>[0.655, 0.767] | 0.296<br>[0.291, 0.302] |
| Pressure cooker                        | 0.790***<br>[0.777, 0.803] | 0.769***<br>[0.756, 0.783]  | 0.888***<br>[0.866, 0.911] | 0.917***<br>[0.907, 0.927] | 1.010<br>[0.972, 1.049]    | 0.866***<br>[0.841, 0.891] | 0.823***<br>[0.778, 0.871] | 0.566<br>[0.561, 0.572] |
| Cooking: wood                          | RC                         | RC                          | RC                         | RC                         | RC                         | RC                         | RC                         | 0.405<br>[0.399, 0.411] |
| Cooking: electricity                   | 0.987<br>[0.876, 1.113]    | 0.886*<br>[0.771, 1.019]    | 0.983<br>[0.799, 1.211]    | 0.998<br>[0.914, 1.089]    | 0.895<br>[0.647, 1.237]    | 0.964<br>[0.775, 1.200]    | 1.176<br>[0.835, 1.657]    | 0.006<br>[0.006, 0.007] |
| Cooking: animal dung                   | 1.016<br>[0.991, 1.041]    | 1.027*<br>[0.999, 1.055]    | 0.988<br>[0.945, 1.033]    | 1.009<br>[0.993, 1.026]    | 1.074**<br>[1.014, 1.139]  | 1.022<br>[0.960, 1.087]    | 1.088**<br>[1.001, 1.184]  | 0.072<br>[0.069, 0.074] |
| Cooking: no food cooked in house       | 3.091***<br>[1.430, 6.680] | 4.436***<br>[1.835, 10.727] | 2.996**<br>[1.295, 6.931]  | 1.175<br>[0.964, 1.433]    | 0.935<br>[0.346, 2.525]    | 0.000***<br>[0.000, 0.000] | 3.094<br>[0.276, 34.641]   | 0.003<br>[0.002, 0.003] |
| Cooking: other                         | 1.118<br>[0.698, 1.790]    | 0.980<br>[0.579, 1.658]     | 0.764<br>[0.403, 1.450]    | 1.075<br>[0.687, 1.681]    | 1.110<br>[0.387, 3.190]    | 0.869<br>[0.375, 2.013]    | 0.207<br>[0.005, 9.121]    | 0.000<br>[0.000, 0.001] |
| Cooking: LPG/natural gas               | 0.770***<br>[0.752, 0.788] | 0.759***<br>[0.741, 0.778]  | 0.881***<br>[0.853, 0.911] | 0.931***<br>[0.918, 0.944] | 1.033<br>[0.983, 1.086]    | 0.875***<br>[0.844, 0.907] | 0.797***<br>[0.735, 0.863] | 0.423<br>[0.416, 0.430] |
| Cooking: biogas                        | 0.755***<br>[0.681, 0.836] | 0.755***<br>[0.678, 0.840]  | 0.753***<br>[0.649, 0.875] | 1.040<br>[0.984, 1.100]    | 0.650***<br>[0.496, 0.853] | 0.994<br>[0.864, 1.143]    | 1.205<br>[0.841, 1.725]    | 0.008<br>[0.007, 0.009] |
| Cooking: kerosene                      | 0.956<br>[0.890, 1.028]    | 1.025<br>[0.957, 1.099]     | 1.101**<br>[1.002, 1.211]  | 0.977<br>[0.933, 1.022]    | 0.924<br>[0.769, 1.110]    | 1.241***<br>[1.111, 1.386] | 1.166<br>[0.886, 1.533]    | 0.012<br>[0.011, 0.013] |
| Cooking: coal, lignite                 | 1.013<br>[0.941, 1.089]    | 1.051<br>[0.971, 1.137]     | 1.159**<br>[1.034, 1.300]  | 0.958*<br>[0.910, 1.008]   | 1.090<br>[0.909, 1.306]    | 0.908<br>[0.761, 1.083]    | 0.937<br>[0.699, 1.256]    | 0.009<br>[0.008, 0.010] |
| Cooking: charcoal                      | 1.031<br>[0.945, 1.125]    | 1.062<br>[0.976, 1.156]     | 0.897<br>[0.774, 1.039]    | 0.991<br>[0.936, 1.050]    | 1.025<br>[0.799, 1.316]    | 0.869<br>[0.718, 1.051]    | 1.397**<br>[1.001, 1.952]  | 0.006<br>[0.005, 0.006] |
| Cooking: straw/shrubs/grass            | 1.092***<br>[1.060, 1.125] | 1.093***<br>[1.056, 1.131]  | 1.061**<br>[1.004, 1.121]  | 1.057***<br>[1.034, 1.081] | 0.938<br>[0.868, 1.014]    | 1.151***<br>[1.069, 1.239] | 1.094<br>[0.966, 1.238]    | 0.025<br>[0.024, 0.027] |

|                                |                            |                            |                            |                            |                            |                            |                            |                         |
|--------------------------------|----------------------------|----------------------------|----------------------------|----------------------------|----------------------------|----------------------------|----------------------------|-------------------------|
| Cooking: agricultural crop     | 1.059***<br>[1.025, 1.094] | 1.102***<br>[1.062, 1.143] | 1.058**<br>[1.001, 1.118]  | 1.017<br>[0.993, 1.041]    | 1.060<br>[0.973, 1.155]    | 1.074*<br>[0.990, 1.164]   | 1.062<br>[0.940, 1.199]    | 0.030<br>[0.028, 0.032] |
| <b>c) Other consumer goods</b> |                            |                            |                            |                            |                            |                            |                            |                         |
| Radio                          | 0.884***<br>[0.859, 0.910] | 0.898***<br>[0.871, 0.926] | 0.959*<br>[0.919, 1.001]   | 0.981**<br>[0.963, 0.999]  | 1.005<br>[0.943, 1.071]    | 1.011<br>[0.964, 1.059]    | 0.890**<br>[0.805, 0.983]  | 0.081<br>[0.080, 0.083] |
| Bicycle                        | 0.938***<br>[0.924, 0.951] | 0.942***<br>[0.928, 0.957] | 1.009<br>[0.987, 1.032]    | 0.971***<br>[0.962, 0.981] | 0.959**<br>[0.926, 0.992]  | 0.974*<br>[0.949, 1.001]   | 0.970<br>[0.921, 1.022]    | 0.521<br>[0.516, 0.526] |
| Motorcycle/scooter             | 0.786***<br>[0.774, 0.798] | 0.779***<br>[0.766, 0.792] | 0.884***<br>[0.864, 0.904] | 0.930***<br>[0.921, 0.939] | 0.927***<br>[0.896, 0.959] | 0.879***<br>[0.857, 0.903] | 0.790***<br>[0.749, 0.834] | 0.377<br>[0.372, 0.381] |
| Car/truck                      | 0.705***<br>[0.669, 0.742] | 0.670***<br>[0.635, 0.706] | 0.837***<br>[0.789, 0.887] | 0.916***<br>[0.891, 0.941] | 0.888**<br>[0.806, 0.978]  | 0.880***<br>[0.826, 0.936] | 0.777***<br>[0.663, 0.910] | 0.060<br>[0.058, 0.063] |
| Telephone (land-line)          | 0.780***<br>[0.731, 0.832] | 0.830***<br>[0.779, 0.886] | 0.966<br>[0.902, 1.033]    | 0.930***<br>[0.899, 0.963] | 0.901<br>[0.793, 1.022]    | 0.948<br>[0.872, 1.029]    | 0.804**<br>[0.656, 0.985]  | 0.039<br>[0.037, 0.041] |
| Mobile telephone               | 0.856***<br>[0.837, 0.875] | 0.831***<br>[0.812, 0.851] | 0.856***<br>[0.824, 0.888] | 0.932***<br>[0.917, 0.947] | 1.015<br>[0.951, 1.083]    | 0.843***<br>[0.803, 0.884] | 0.917**<br>[0.842, 0.998]  | 0.904<br>[0.902, 0.906] |
| Watch                          | 0.865***<br>[0.852, 0.878] | 0.871***<br>[0.857, 0.885] | 0.933***<br>[0.910, 0.956] | 0.938***<br>[0.928, 0.947] | 0.969<br>[0.932, 1.006]    | 0.930***<br>[0.901, 0.959] | 0.839***<br>[0.795, 0.885] | 0.781<br>[0.778, 0.785] |
| Mattress                       | 0.834***<br>[0.821, 0.846] | 0.832***<br>[0.819, 0.846] | 0.896***<br>[0.875, 0.918] | 0.933***<br>[0.924, 0.943] | 0.965*<br>[0.930, 1.001]   | 0.899***<br>[0.874, 0.925] | 0.856***<br>[0.811, 0.903] | 0.667<br>[0.662, 0.672] |
| Chair                          | 0.836***<br>[0.824, 0.848] | 0.832***<br>[0.819, 0.845] | 0.898***<br>[0.877, 0.920] | 0.935***<br>[0.925, 0.944] | 0.959**<br>[0.924, 0.994]  | 0.882***<br>[0.856, 0.909] | 0.844***<br>[0.800, 0.890] | 0.762<br>[0.758, 0.765] |
| Cot/bed                        | 0.891***<br>[0.872, 0.911] | 0.873***<br>[0.853, 0.893] | 0.906***<br>[0.877, 0.936] | 0.963***<br>[0.949, 0.977] | 0.918***<br>[0.866, 0.972] | 0.915***<br>[0.880, 0.951] | 0.782***<br>[0.719, 0.850] | 0.884<br>[0.881, 0.887] |
| Table                          | 0.828***<br>[0.816, 0.841] | 0.816***<br>[0.803, 0.829] | 0.884***<br>[0.864, 0.905] | 0.928***<br>[0.919, 0.937] | 0.910***<br>[0.879, 0.941] | 0.877***<br>[0.854, 0.900] | 0.837***<br>[0.794, 0.882] | 0.554<br>[0.550, 0.559] |
| Electric fan                   | 0.820***<br>[0.806, 0.835] | 0.810***<br>[0.795, 0.826] | 0.867***<br>[0.842, 0.893] | 0.931***<br>[0.919, 0.942] | 0.969<br>[0.927, 1.013]    | 0.892***<br>[0.858, 0.926] | 0.799***<br>[0.750, 0.851] | 0.782<br>[0.777, 0.786] |
| Black and white television     | 0.907***<br>[0.874, 0.941] | 0.889***<br>[0.855, 0.925] | 0.907***<br>[0.857, 0.960] | 0.962***<br>[0.940, 0.984] | 1.046<br>[0.966, 1.132]    | 1.076**<br>[1.010, 1.147]  | 0.978<br>[0.872, 1.098]    | 0.033<br>[0.032, 0.034] |
| Color television               | 0.813***<br>[0.799, 0.827] | 0.805***<br>[0.791, 0.820] | 0.901***<br>[0.878, 0.924] | 0.931***<br>[0.921, 0.941] | 0.967<br>[0.929, 1.007]    | 0.875***<br>[0.848, 0.902] | 0.796***<br>[0.750, 0.845] | 0.635<br>[0.630, 0.640] |
| Sewing machine                 | 0.822***<br>[0.806, 0.837] | 0.821***<br>[0.805, 0.838] | 0.919***<br>[0.895, 0.944] | 0.937***<br>[0.927, 0.947] | 0.991<br>[0.953, 1.030]    | 0.901***<br>[0.874, 0.930] | 0.779***<br>[0.731, 0.830] | 0.240<br>[0.237, 0.243] |
| Computer                       | 0.763***<br>[0.730, 0.797] | 0.708***<br>[0.676, 0.741] | 0.881***<br>[0.836, 0.927] | 0.888***<br>[0.866, 0.909] | 0.923*<br>[0.852, 1.000]   | 0.821***<br>[0.775, 0.870] | 0.660***<br>[0.566, 0.770] | 0.090<br>[0.087, 0.093] |
| Air conditioner/cooler         | 0.784***                   | 0.780***                   | 0.894***                   | 0.925***                   | 1.018                      | 0.872***                   | 0.743***                   | 0.179                   |

|                                     |                |                |                |                |                |                |                |                |
|-------------------------------------|----------------|----------------|----------------|----------------|----------------|----------------|----------------|----------------|
|                                     | [0.765, 0.804] | [0.759, 0.801] | [0.863, 0.926] | [0.912, 0.938] | [0.969, 1.069] | [0.840, 0.906] | [0.684, 0.807] | [0.175, 0.183] |
| Washing machine                     | 0.722***       | 0.714***       | 0.835***       | 0.910***       | 0.948          | 0.833***       | 0.665***       | 0.136          |
|                                     | [0.697, 0.749] | [0.688, 0.742] | [0.799, 0.874] | [0.894, 0.928] | [0.887, 1.013] | [0.794, 0.873] | [0.589, 0.751] | [0.132, 0.140] |
| <b>d) Housing quality</b>           |                |                |                |                |                |                |                |                |
| Residents per bedroom               | 1.039***       | 1.039***       | 1.012***       | 1.014***       | 0.987***       | 1.014***       | 0.850***       | 2.917          |
|                                     | [1.036, 1.043] | [1.035, 1.043] | [1.006, 1.018] | [1.011, 1.016] | [0.978, 0.996] | [1.006, 1.021] | [0.836, 0.863] | [2.905, 2.929] |
| Floor: cement                       | RC             | 0.393          |
|                                     |                |                |                |                |                |                |                | [0.388, 0.397] |
| Floor: mud/clay/earth               | 1.241***       | 1.233***       | 1.110***       | 1.071***       | 1.010          | 1.112***       | 1.251***       | 0.271          |
|                                     | [1.215, 1.267] | [1.207, 1.260] | [1.074, 1.146] | [1.056, 1.086] | [0.961, 1.061] | [1.070, 1.156] | [1.160, 1.348] | [0.266, 0.276] |
| Floor: ceramic tiles                | 0.913***       | 0.844***       | 0.913***       | 0.950***       | 0.925**        | 0.955**        | 0.883**        | 0.106          |
|                                     | [0.883, 0.943] | [0.816, 0.874] | [0.874, 0.953] | [0.932, 0.967] | [0.860, 0.995] | [0.913, 0.999] | [0.780, 0.999] | [0.102, 0.110] |
| Floor: carpet                       | 0.986          | 0.956          | 1.045          | 1.050          | 1.011          | 1.157*         | 0.713          | 0.006          |
|                                     | [0.863, 1.125] | [0.835, 1.094] | [0.897, 1.217] | [0.975, 1.131] | [0.767, 1.332] | [0.974, 1.374] | [0.376, 1.353] | [0.005, 0.006] |
| Floor: polished stone/marble/grani. | 0.828***       | 0.786***       | 0.904***       | 0.921***       | 0.832***       | 0.857***       | 0.864**        | 0.077          |
|                                     | [0.795, 0.862] | [0.753, 0.820] | [0.859, 0.951] | [0.901, 0.941] | [0.766, 0.905] | [0.811, 0.907] | [0.748, 0.997] | [0.074, 0.080] |
| Floor: other                        | 0.808          | 0.807          | 1.140          | 0.943          | 1.027          | 0.922          | 1.748          | 0.001          |
|                                     | [0.525, 1.244] | [0.512, 1.273] | [0.683, 1.902] | [0.716, 1.242] | [0.418, 2.520] | [0.488, 1.741] | [0.470, 6.493] | [0.001, 0.001] |
| Floor: sand                         | 1.242***       | 1.291***       | 1.153**        | 1.016          | 1.417***       | 1.065          | 1.270*         | 0.007          |
|                                     | [1.153, 1.338] | [1.196, 1.394] | [1.028, 1.293] | [0.967, 1.068] | [1.187, 1.693] | [0.929, 1.220] | [0.970, 1.662] | [0.007, 0.007] |
| Floor: dung                         | 1.230***       | 1.223***       | 1.056**        | 1.077***       | 0.989          | 1.105***       | 1.246***       | 0.070          |
|                                     | [1.194, 1.267] | [1.185, 1.262] | [1.006, 1.109] | [1.057, 1.099] | [0.921, 1.063] | [1.043, 1.172] | [1.126, 1.379] | [0.068, 0.072] |
| Floor: raw wood planks              | 1.052          | 1.054          | 1.071          | 0.873          | 1.248          | 1.289          | 1.329          | 0.002          |
|                                     | [0.743, 1.490] | [0.692, 1.607] | [0.618, 1.855] | [0.670, 1.137] | [0.561, 2.777] | [0.744, 2.233] | [0.427, 4.137] | [0.002, 0.003] |
| Floor: palm/bamboo                  | 1.104          | 1.114          | 1.051          | 1.004          | 1.143          | 0.941          | 1.359          | 0.002          |
|                                     | [0.784, 1.555] | [0.795, 1.561] | [0.667, 1.657] | [0.781, 1.290] | [0.568, 2.302] | [0.578, 1.532] | [0.506, 3.645] | [0.002, 0.002] |
| Floor: brick                        | 1.106***       | 1.148***       | 1.098          | 0.995          | 1.099          | 1.000          | 1.243          | 0.008          |
|                                     | [1.025, 1.193] | [1.058, 1.245] | [0.974, 1.237] | [0.950, 1.041] | [0.935, 1.291] | [0.869, 1.150] | [0.937, 1.650] | [0.007, 0.008] |
| Floor: stone                        | 0.993          | 0.936***       | 0.925***       | 0.960***       | 0.806***       | 0.881***       | 1.083          | 0.055          |
|                                     | [0.954, 1.034] | [0.898, 0.976] | [0.873, 0.981] | [0.937, 0.984] | [0.728, 0.892] | [0.828, 0.937] | [0.941, 1.246] | [0.052, 0.057] |
| Floor: parquet/polished wood        | 1.067          | 0.939          | 1.261          | 0.959          | 1.360          | 0.810          | 0.471          | 0.002          |
|                                     | [0.834, 1.364] | [0.706, 1.251] | [0.915, 1.738] | [0.795, 1.156] | [0.830, 2.229] | [0.530, 1.239] | [0.098, 2.276] | [0.002, 0.002] |
| Floor: vinyl/asphalt strips         | 1.289          | 1.373*         | 1.681***       | 0.886          | 2.200*         | 0.899          | 0.453          | 0.002          |
|                                     | [0.841, 1.977] | [0.963, 1.957] | [1.167, 2.423] | [0.684, 1.146] | [0.942, 5.138] | [0.538, 1.502] | [0.025, 8.127] | [0.001, 0.002] |
| Roof: RCC/RBC/cement/concrete       | RC             | 0.413          |
|                                     |                |                |                |                |                |                |                | [0.408, 0.419] |

|                                  |                |                |                |                |                |                |                |                |
|----------------------------------|----------------|----------------|----------------|----------------|----------------|----------------|----------------|----------------|
| Roof: no roof                    | 1.295***       | 1.349***       | 1.154          | 0.981          | 1.002          | 1.122          | 1.018          | 0.002          |
|                                  | [1.153, 1.453] | [1.193, 1.526] | [0.946, 1.407] | [0.897, 1.073] | [0.758, 1.325] | [0.901, 1.396] | [0.614, 1.687] | [0.002, 0.002] |
| Roof: loosely packed stone       | 1.136***       | 1.143***       | 1.072          | 1.004          | 0.977          | 1.041          | 1.120          | 0.023          |
|                                  | [1.080, 1.195] | [1.083, 1.206] | [0.985, 1.166] | [0.971, 1.038] | [0.861, 1.109] | [0.950, 1.141] | [0.932, 1.348] | [0.022, 0.025] |
| Roof: metal/GI                   | 1.173***       | 1.218***       | 1.127***       | 1.077***       | 1.113**        | 1.055*         | 1.227***       | 0.110          |
|                                  | [1.135, 1.212] | [1.179, 1.259] | [1.075, 1.182] | [1.055, 1.100] | [1.025, 1.209] | [0.997, 1.116] | [1.084, 1.388] | [0.106, 0.113] |
| Roof: wood                       | 1.152***       | 1.226***       | 1.017          | 1.009          | 1.014          | 1.114*         | 1.464***       | 0.012          |
|                                  | [1.082, 1.227] | [1.151, 1.307] | [0.919, 1.125] | [0.970, 1.050] | [0.872, 1.179] | [0.990, 1.252] | [1.193, 1.798] | [0.011, 0.012] |
| Roof: calamine/cement fiber      | 1.164***       | 1.152***       | 1.074**        | 1.076***       | 1.056          | 1.163***       | 1.174**        | 0.028          |
|                                  | [1.119, 1.211] | [1.104, 1.203] | [1.010, 1.143] | [1.049, 1.105] | [0.958, 1.164] | [1.078, 1.254] | [1.010, 1.365] | [0.027, 0.030] |
| Roof: asbestos sheets            | 1.133***       | 1.140***       | 1.037*         | 1.065***       | 1.003          | 1.152***       | 1.226***       | 0.076          |
|                                  | [1.103, 1.164] | [1.109, 1.172] | [0.996, 1.079] | [1.047, 1.083] | [0.941, 1.069] | [1.099, 1.208] | [1.116, 1.346] | [0.073, 0.078] |
| Roof: roofing shingles           | 1.137***       | 1.155***       | 1.083**        | 1.014          | 1.165**        | 1.062          | 1.234**        | 0.020          |
|                                  | [1.076, 1.202] | [1.094, 1.221] | [1.001, 1.172] | [0.982, 1.047] | [1.009, 1.344] | [0.960, 1.175] | [1.013, 1.505] | [0.019, 0.021] |
| Roof: tiles                      | 1.205***       | 1.195***       | 1.105***       | 1.057***       | 1.068*         | 1.174***       | 1.280***       | 0.071          |
|                                  | [1.170, 1.242] | [1.157, 1.233] | [1.056, 1.156] | [1.037, 1.078] | [0.988, 1.155] | [1.112, 1.239] | [1.141, 1.436] | [0.068, 0.073] |
| Roof: slate                      | 1.134***       | 1.141***       | 1.050**        | 1.034***       | 0.949          | 1.066**        | 1.261***       | 0.081          |
|                                  | [1.100, 1.169] | [1.104, 1.179] | [1.001, 1.102] | [1.015, 1.054] | [0.879, 1.023] | [1.009, 1.127] | [1.133, 1.404] | [0.079, 0.084] |
| Roof: burnt brick                | 1.171***       | 1.156***       | 1.068**        | 1.036***       | 1.011          | 1.116***       | 1.156***       | 0.045          |
|                                  | [1.134, 1.209] | [1.113, 1.200] | [1.005, 1.135] | [1.013, 1.061] | [0.933, 1.095] | [1.033, 1.207] | [1.036, 1.290] | [0.043, 0.047] |
| Roof: thatch/palm leaf           | 1.217***       | 1.245***       | 1.126***       | 1.080***       | 0.999          | 1.121***       | 1.237***       | 0.045          |
|                                  | [1.184, 1.252] | [1.207, 1.284] | [1.070, 1.184] | [1.059, 1.102] | [0.931, 1.071] | [1.053, 1.194] | [1.117, 1.369] | [0.043, 0.046] |
| Roof: other                      | 1.181***       | 1.282***       | 1.170***       | 1.044**        | 0.920          | 1.173***       | 1.378***       | 0.029          |
|                                  | [1.117, 1.249] | [1.207, 1.362] | [1.069, 1.281] | [1.009, 1.080] | [0.813, 1.041] | [1.050, 1.311] | [1.150, 1.652] | [0.027, 0.031] |
| Roof: mud                        | 1.265***       | 1.226***       | 1.000          | 1.024          | 1.085          | 1.042          | 1.147          | 0.009          |
|                                  | [1.187, 1.347] | [1.145, 1.313] | [0.894, 1.117] | [0.978, 1.073] | [0.916, 1.285] | [0.913, 1.189] | [0.890, 1.477] | [0.008, 0.009] |
| Roof: sod/mud and grass mixture  | 1.265***       | 1.231***       | 1.156***       | 1.103***       | 1.057          | 1.191***       | 1.070          | 0.009          |
|                                  | [1.204, 1.329] | [1.163, 1.302] | [1.055, 1.266] | [1.063, 1.145] | [0.926, 1.206] | [1.048, 1.353] | [0.870, 1.314] | [0.009, 0.010] |
| Roof: plastic/polythene sheeting | 1.293***       | 1.286***       | 1.296***       | 1.132***       | 1.138          | 1.322***       | 1.597***       | 0.008          |
|                                  | [1.215, 1.375] | [1.202, 1.377] | [1.175, 1.429] | [1.083, 1.184] | [0.961, 1.347] | [1.160, 1.507] | [1.259, 2.026] | [0.007, 0.008] |
| Roof: rustic mat                 | 1.095          | 1.081          | 1.459***       | 1.051          | 1.118          | 1.162          | 0.779          | 0.001          |
|                                  | [0.927, 1.294] | [0.887, 1.317] | [1.121, 1.899] | [0.923, 1.197] | [0.789, 1.583] | [0.777, 1.737] | [0.373, 1.624] | [0.001, 0.001] |
| Roof: palm/bamboo                | 1.213***       | 1.236***       | 1.166***       | 1.071***       | 1.108          | 1.068          | 1.344***       | 0.007          |
|                                  | [1.147, 1.282] | [1.163, 1.313] | [1.055, 1.288] | [1.030, 1.113] | [0.973, 1.263] | [0.937, 1.217] | [1.115, 1.620] | [0.007, 0.008] |
| Roof: raw wood planks/timber     | 1.185***       | 1.148***       | 1.226***       | 1.076***       | 1.327***       | 1.025          | 1.369**        | 0.006          |
|                                  | [1.093, 1.286] | [1.049, 1.257] | [1.074, 1.400] | [1.024, 1.130] | [1.098, 1.605] | [0.864, 1.216] | [1.006, 1.864] | [0.006, 0.007] |

|                                |                |                |                |                |                |                |                |                |
|--------------------------------|----------------|----------------|----------------|----------------|----------------|----------------|----------------|----------------|
| Roof: unburnt bricks           | 1.236***       | 1.228***       | 1.143**        | 1.100***       | 1.172*         | 1.168**        | 1.203          | 0.005          |
|                                | [1.148, 1.330] | [1.127, 1.337] | [1.014, 1.289] | [1.043, 1.161] | [0.974, 1.410] | [1.011, 1.349] | [0.903, 1.601] | [0.005, 0.005] |
| Wall: cement/concrete          | RC             | 0.379          |
|                                |                |                |                |                |                |                |                | [0.373, 0.385] |
| Wall: no walls                 | 1.390***       | 1.457***       | 1.174*         | 1.019          | 0.959          | 0.873          | 0.882          | 0.003          |
|                                | [1.256, 1.537] | [1.311, 1.619] | [0.986, 1.398] | [0.944, 1.100] | [0.742, 1.240] | [0.710, 1.073] | [0.539, 1.442] | [0.003, 0.004] |
| Wall: raw/reused wood          | 1.246**        | 1.181          | 1.116          | 1.076          | 0.972          | 1.541**        | 1.634          | 0.003          |
|                                | [1.006, 1.543] | [0.926, 1.507] | [0.790, 1.577] | [0.907, 1.275] | [0.593, 1.594] | [1.094, 2.170] | [0.772, 3.457] | [0.002, 0.003] |
| Wall: stone with lime/cement   | 1.084***       | 1.078***       | 1.089***       | 1.059***       | 1.000          | 1.115***       | 1.216***       | 0.059          |
|                                | [1.039, 1.130] | [1.033, 1.125] | [1.030, 1.151] | [1.033, 1.086] | [0.899, 1.113] | [1.047, 1.187] | [1.049, 1.409] | [0.057, 0.061] |
| Wall: burnt bricks             | 1.156***       | 1.151***       | 1.075***       | 1.042***       | 0.977          | 1.082***       | 1.215***       | 0.252          |
|                                | [1.130, 1.182] | [1.123, 1.179] | [1.038, 1.114] | [1.027, 1.057] | [0.929, 1.028] | [1.039, 1.128] | [1.125, 1.314] | [0.247, 0.257] |
| Wall: cement blocks            | 1.029          | 1.056***       | 1.095***       | 1.002          | 1.031          | 1.122***       | 1.217***       | 0.058          |
|                                | [0.991, 1.068] | [1.016, 1.097] | [1.040, 1.154] | [0.979, 1.026] | [0.950, 1.120] | [1.060, 1.188] | [1.066, 1.389] | [0.055, 0.060] |
| Wall: wood planks/shingles     | 1.104          | 1.076          | 0.972          | 1.007          | 1.103          | 1.216          | 1.399          | 0.002          |
|                                | [0.894, 1.364] | [0.840, 1.378] | [0.668, 1.414] | [0.875, 1.158] | [0.693, 1.755] | [0.855, 1.728] | [0.669, 2.927] | [0.002, 0.002] |
| Wall: GI/metal/asbestos sheets | 1.415***       | 1.215***       | 1.180**        | 1.132***       | 1.530***       | 1.105          | 1.976***       | 0.010          |
|                                | [1.286, 1.556] | [1.099, 1.343] | [1.029, 1.354] | [1.061, 1.209] | [1.200, 1.951] | [0.954, 1.280] | [1.346, 2.900] | [0.009, 0.011] |
| Wall: other                    | 1.085          | 1.228***       | 1.128          | 1.068          | 1.461**        | 1.133          | 0.524          | 0.002          |
|                                | [0.922, 1.277] | [1.055, 1.430] | [0.918, 1.386] | [0.966, 1.180] | [1.022, 2.088] | [0.868, 1.478] | [0.229, 1.197] | [0.002, 0.002] |
| Wall: cane/palm/trunks         | 1.237***       | 1.313***       | 1.298***       | 1.075***       | 0.983          | 1.204***       | 1.333***       | 0.016          |
|                                | [1.169, 1.309] | [1.237, 1.394] | [1.183, 1.424] | [1.032, 1.119] | [0.849, 1.139] | [1.068, 1.357] | [1.091, 1.627] | [0.015, 0.017] |
| Wall: mud                      | 1.220***       | 1.244***       | 1.145***       | 1.103***       | 1.025          | 1.169***       | 1.297***       | 0.136          |
|                                | [1.188, 1.252] | [1.211, 1.278] | [1.101, 1.192] | [1.084, 1.122] | [0.962, 1.093] | [1.116, 1.225] | [1.183, 1.422] | [0.132, 0.139] |
| Wall: grass/reeds/thatch       | 1.351***       | 1.350***       | 1.090*         | 1.076***       | 1.017          | 1.322***       | 1.305***       | 0.009          |
|                                | [1.286, 1.420] | [1.276, 1.428] | [0.990, 1.200] | [1.038, 1.116] | [0.903, 1.145] | [1.162, 1.504] | [1.079, 1.578] | [0.008, 0.009] |
| Wall: bamboo with mud          | 1.297***       | 1.319***       | 1.162***       | 1.076***       | 1.028          | 1.038          | 1.506***       | 0.028          |
|                                | [1.239, 1.358] | [1.258, 1.383] | [1.081, 1.250] | [1.041, 1.112] | [0.912, 1.159] | [0.932, 1.155] | [1.288, 1.762] | [0.027, 0.029] |
| Wall: stone with mud           | 1.217***       | 1.246***       | 1.217***       | 1.047***       | 0.952          | 1.118**        | 1.475***       | 0.021          |
|                                | [1.152, 1.285] | [1.179, 1.318] | [1.122, 1.319] | [1.012, 1.084] | [0.810, 1.118] | [1.017, 1.230] | [1.210, 1.799] | [0.020, 0.022] |
| Wall: plywood                  | 1.136          | 0.998          | 1.082          | 1.183          | 1.896          | 1.171          | 0.331          | 0.001          |
|                                | [0.832, 1.549] | [0.678, 1.469] | [0.663, 1.767] | [0.916, 1.528] | [0.832, 4.319] | [0.624, 2.201] | [0.024, 4.527] | [0.001, 0.001] |
| Wall: cardboard                | 1.169          | 1.128          | 0.987          | 0.872          | 0.771          | 1.049          | 0.771          | 0.001          |
|                                | [0.949, 1.441] | [0.896, 1.418] | [0.671, 1.453] | [0.727, 1.047] | [0.443, 1.341] | [0.724, 1.518] | [0.336, 1.773] | [0.001, 0.001] |
| Wall: unburnt brick            | 1.259***       | 1.224***       | 1.073**        | 1.094***       | 0.939          | 1.085**        | 1.453***       | 0.021          |
|                                | [1.207, 1.312] | [1.169, 1.282] | [1.001, 1.151] | [1.064, 1.125] | [0.840, 1.051] | [1.002, 1.175] | [1.241, 1.701] | [0.020, 0.022] |

**e) Other**

|                               |                            |                            |                            |                            |                            |                            |                            |                         |
|-------------------------------|----------------------------|----------------------------|----------------------------|----------------------------|----------------------------|----------------------------|----------------------------|-------------------------|
| Staff                         | 0.592**<br>[0.376, 0.932]  | 0.643*<br>[0.407, 1.014]   | 0.809<br>[0.482, 1.357]    | 0.896<br>[0.742, 1.083]    | 1.000<br>[0.549, 1.820]    | 0.863<br>[0.507, 1.467]    | 1.132<br>[0.528, 2.424]    | 0.002<br>[0.001, 0.002] |
| Bank account                  | 0.874***<br>[0.858, 0.890] | 0.875***<br>[0.858, 0.892] | 0.915***<br>[0.888, 0.943] | 0.947***<br>[0.935, 0.959] | 1.062**<br>[1.011, 1.115]  | 0.866***<br>[0.834, 0.900] | 0.885***<br>[0.824, 0.949] | 0.895<br>[0.893, 0.897] |
| Electricity                   | 0.854***<br>[0.838, 0.870] | 0.839***<br>[0.822, 0.856] | 0.886***<br>[0.857, 0.916] | 0.943***<br>[0.930, 0.956] | 0.990<br>[0.943, 1.039]    | 0.918***<br>[0.876, 0.962] | 0.862***<br>[0.805, 0.923] | 0.882<br>[0.879, 0.885] |
| Animal-drawn cart             | 0.906***<br>[0.876, 0.938] | 0.926***<br>[0.894, 0.960] | 0.971<br>[0.924, 1.021]    | 0.981*<br>[0.961, 1.003]   | 0.951<br>[0.879, 1.029]    | 0.947*<br>[0.889, 1.009]   | 0.950<br>[0.841, 1.074]    | 0.036<br>[0.035, 0.037] |
| Land usable for agriculture   | 0.891***<br>[0.878, 0.905] | 0.863***<br>[0.849, 0.877] | 0.914***<br>[0.892, 0.936] | 0.943***<br>[0.934, 0.953] | 0.944***<br>[0.911, 0.979] | 0.927***<br>[0.901, 0.955] | 0.890***<br>[0.845, 0.938] | 0.389<br>[0.384, 0.394] |
| Internet                      | 0.795***<br>[0.768, 0.824] | 0.741***<br>[0.714, 0.769] | 0.842***<br>[0.803, 0.883] | 0.921***<br>[0.903, 0.940] | 0.947<br>[0.886, 1.013]    | 0.839***<br>[0.798, 0.882] | 0.769***<br>[0.680, 0.870] | 0.109<br>[0.106, 0.112] |
| Thresher                      | 0.806***<br>[0.763, 0.851] | 0.827***<br>[0.781, 0.875] | 1.011<br>[0.938, 1.090]    | 0.941***<br>[0.910, 0.973] | 0.987<br>[0.888, 1.097]    | 0.902**<br>[0.823, 0.989]  | 0.915<br>[0.772, 1.085]    | 0.015<br>[0.014, 0.015] |
| Tractor                       | 0.779***<br>[0.747, 0.813] | 0.763***<br>[0.729, 0.799] | 0.869***<br>[0.818, 0.923] | 0.957***<br>[0.934, 0.981] | 0.972<br>[0.893, 1.057]    | 0.872***<br>[0.811, 0.937] | 0.787***<br>[0.688, 0.899] | 0.025<br>[0.024, 0.025] |
| Household member owns a house | 0.963***<br>[0.945, 0.982] | 0.943***<br>[0.923, 0.962] | 0.966**<br>[0.938, 0.994]  | 0.971***<br>[0.960, 0.983] | 0.985<br>[0.941, 1.032]    | 0.915***<br>[0.886, 0.946] | 0.950<br>[0.886, 1.018]    | 0.798<br>[0.794, 0.803] |
| Observations                  | 185,529                    | 179,341                    | 157,464                    | 181,977                    | 110,384                    | 118,263                    | 86,172                     | 601,509                 |

Notes: \*\*\* p<0.01, \*\* p<0.05, \* p<0.1. Prevalence ratios are shown. All estimates were weighted and tests for statistical significance and 95% confidence intervals (shown in brackets) were calculated using robust standard errors. Estimates for each wealth index item were obtained from separated models  $poisson(y_{ihp} = 1) = \beta_j w_{jh} + \mathbf{Y}' \mathbf{x}_{ih} + \mu_p$ . Control variables: sex and age. Models were further adjusted for unobserved PSU-level factors. Proportions are for all households interviewed. Acronyms and abbreviations: liquefied petroleum gas (LPG), reinforced cement concrete (RCC), reinforced brick concrete (RBC), galvanized iron (GI), granite (grani.), shared (sh.), sewer system (sewer s.), without (w/o), with(w/), reverse osmosis (RO), reference category (RC).

Table A2. Results from conditional Poisson regressions. Each wealth index item entered separately including a full set of control variables.

|                                       | <u>Stunting</u>            | <u>Underweight</u>         | <u>Wasting</u>             | <u>Anemia</u>              | <u>Diarrhea</u>            | <u>Low birth weight</u>    | <u>Mortality</u>           | <u>Proportion (households)</u> |
|---------------------------------------|----------------------------|----------------------------|----------------------------|----------------------------|----------------------------|----------------------------|----------------------------|--------------------------------|
| <b>a) Water and toilet facilities</b> |                            |                            |                            |                            |                            |                            |                            |                                |
| Water pump                            | 0.971***<br>[0.949, 0.993] | 0.987<br>[0.964, 1.010]    | 1.010<br>[0.977, 1.044]    | 1.009<br>[0.995, 1.023]    | 0.954*<br>[0.910, 1.001]   | 0.939***<br>[0.903, 0.976] | 0.995<br>[0.919, 1.078]    | 0.172<br>[0.169, 0.176]        |
| Toilet: no facility/bush/field        | RC                         | 0.389<br>[0.383, 0.395]        |
| Toilet: flush to piped sewer system   | 0.941**<br>[0.897, 0.988]  | 0.995<br>[0.944, 1.048]    | 1.021<br>[0.956, 1.090]    | 1.002<br>[0.974, 1.030]    | 0.944<br>[0.852, 1.048]    | 0.950<br>[0.881, 1.025]    | 0.724***<br>[0.585, 0.894] | 0.078<br>[0.074, 0.083]        |
| Toilet: composting toilet             | 0.992<br>[0.761, 1.293]    | 1.027<br>[0.796, 1.325]    | 1.104<br>[0.752, 1.621]    | 0.988<br>[0.830, 1.176]    | 1.290<br>[0.699, 2.379]    | 0.804<br>[0.473, 1.369]    | 0.438<br>[0.092, 2.080]    | 0.001<br>[0.001, 0.001]        |
| Toilet: dry toilet                    | 0.832**<br>[0.694, 0.998]  | 0.861<br>[0.707, 1.049]    | 0.907<br>[0.706, 1.167]    | 0.904*<br>[0.814, 1.002]   | 0.899<br>[0.595, 1.360]    | 1.499***<br>[1.136, 1.977] | 1.386<br>[0.830, 2.312]    | 0.004<br>[0.003, 0.004]        |
| Toilet: other                         | 0.878<br>[0.659, 1.171]    | 0.921<br>[0.696, 1.218]    | 0.801<br>[0.555, 1.157]    | 1.045<br>[0.905, 1.208]    | 0.485<br>[0.187, 1.257]    | 0.732<br>[0.409, 1.309]    | 0.157*<br>[0.018, 1.383]   | 0.001<br>[0.001, 0.001]        |
| Toilet: sh. Flush to piped sewer s.   | 1.119***<br>[1.039, 1.206] | 1.016<br>[0.942, 1.096]    | 0.905*<br>[0.807, 1.014]   | 1.028<br>[0.985, 1.073]    | 0.903<br>[0.760, 1.073]    | 0.954<br>[0.848, 1.074]    | 0.938<br>[0.695, 1.265]    | 0.012<br>[0.010, 0.013]        |
| Toilet: shared flush to septic tank   | 0.953***<br>[0.920, 0.988] | 0.956**<br>[0.921, 0.993]  | 0.991<br>[0.938, 1.047]    | 1.000<br>[0.979, 1.022]    | 1.097**<br>[1.019, 1.182]  | 1.088***<br>[1.023, 1.156] | 1.021<br>[0.896, 1.163]    | 0.054<br>[0.052, 0.057]        |
| Toilet: shared flush to pit latrine   | 0.946*<br>[0.890, 1.007]   | 0.962<br>[0.901, 1.028]    | 0.964<br>[0.876, 1.060]    | 0.989<br>[0.951, 1.030]    | 1.083<br>[0.935, 1.254]    | 0.888**<br>[0.798, 0.989]  | 1.072<br>[0.859, 1.337]    | 0.014<br>[0.013, 0.015]        |
| Toilet: sh. Flush to somewhere else   | 0.550***<br>[0.453, 0.668] | 0.835***<br>[0.734, 0.949] | 1.441***<br>[1.221, 1.702] | 1.063<br>[0.988, 1.143]    | 1.433**<br>[1.077, 1.907]  | 1.625***<br>[1.424, 1.854] | 2.083**<br>[1.129, 3.841]  | 0.004<br>[0.003, 0.005]        |
| Toilet: sh. Flush don't know where    | 1.152<br>[0.904, 1.469]    | 1.197<br>[0.922, 1.552]    | 1.329**<br>[1.050, 1.681]  | 1.193*<br>[0.967, 1.473]   | 0.172<br>[0.016, 1.801]    | 1.118<br>[0.691, 1.809]    | 1.987<br>[0.706, 5.590]    | 0.000<br>[0.000, 0.000]        |
| Toilet: sh. Ventilated improved pit   | 0.833<br>[0.664, 1.044]    | 0.724**<br>[0.558, 0.941]  | 0.707*<br>[0.494, 1.013]   | 1.082<br>[0.945, 1.239]    | 0.871<br>[0.506, 1.501]    | 1.439**<br>[1.004, 2.062]  | 1.010<br>[0.369, 2.763]    | 0.001<br>[0.001, 0.002]        |
| Toilet: shared pit latrine w/ slab    | 0.955<br>[0.882, 1.034]    | 1.081**<br>[1.000, 1.167]  | 1.014<br>[0.902, 1.140]    | 1.007<br>[0.957, 1.059]    | 1.082<br>[0.870, 1.346]    | 0.998<br>[0.874, 1.139]    | 0.907<br>[0.686, 1.199]    | 0.009<br>[0.009, 0.010]        |
| Toilet: flush to septic tank          | 0.957***<br>[0.933, 0.981] | 0.957***<br>[0.931, 0.983] | 1.009<br>[0.972, 1.047]    | 0.973***<br>[0.958, 0.989] | 0.976<br>[0.922, 1.033]    | 0.976<br>[0.934, 1.020]    | 0.895**<br>[0.815, 0.984]  | 0.287<br>[0.283, 0.292]        |
| Toilet: sh. Pit w/o slab/open pit     | 1.015<br>[0.867, 1.190]    | 1.140<br>[0.965, 1.348]    | 1.221<br>[0.938, 1.591]    | 1.088<br>[0.953, 1.243]    | 1.673***<br>[1.145, 2.446] | 1.074<br>[0.788, 1.463]    | 0.777<br>[0.400, 1.510]    | 0.003<br>[0.003, 0.003]        |
| Toilet: shared composting toilet      | 0.889<br>[0.660, 1.198]    | 1.037<br>[0.764, 1.409]    | 0.390*<br>[0.145, 1.052]   | 0.683**<br>[0.485, 0.961]  | 0.258<br>[0.015, 4.483]    | 0.344**<br>[0.137, 0.862]  | 1.036<br>[0.184, 5.842]    | 0.000<br>[0.000, 0.001]        |
| Toilet: shared dry toilet             | 0.957                      | 1.103                      | 0.964                      | 1.039                      | 0.624                      | 0.384***                   | 1.466                      | 0.001                          |

|                                   |                |                |                |                |                |                |                |                |
|-----------------------------------|----------------|----------------|----------------|----------------|----------------|----------------|----------------|----------------|
|                                   | [0.735, 1.245] | [0.816, 1.490] | [0.577, 1.610] | [0.898, 1.203] | [0.275, 1.414] | [0.245, 0.603] | [0.497, 4.323] | [0.001, 0.001] |
| Toilet: shared other              | 0.967          | 1.163          | 1.395***       | 1.140***       | 0.753          | 1.730***       | 1.478          | 0.002          |
|                                   | [0.760, 1.231] | [0.945, 1.431] | [1.129, 1.724] | [1.044, 1.244] | [0.397, 1.426] | [1.238, 2.416] | [0.725, 3.012] | [0.001, 0.002] |
| Toilet: flush to pit latrine      | 0.984          | 0.999          | 0.975          | 0.965***       | 1.004          | 0.953          | 0.872**        | 0.072          |
|                                   | [0.948, 1.020] | [0.961, 1.039] | [0.924, 1.030] | [0.942, 0.988] | [0.922, 1.094] | [0.895, 1.016] | [0.761, 0.999] | [0.070, 0.074] |
| Toilet: flush to somewhere else   | 0.952          | 1.076          | 0.868**        | 1.029          | 0.733**        | 0.854**        | 0.926          | 0.009          |
|                                   | [0.862, 1.051] | [0.976, 1.186] | [0.763, 0.989] | [0.967, 1.096] | [0.546, 0.984] | [0.732, 0.996] | [0.648, 1.323] | [0.008, 0.010] |
| Toilet: flush don't know where    | 1.177          | 0.779          | 0.968          | 1.076          | 1.588          | 1.010          | 0.672          | 0.001          |
|                                   | [0.896, 1.546] | [0.563, 1.079] | [0.649, 1.444] | [0.927, 1.248] | [0.860, 2.934] | [0.673, 1.518] | [0.241, 1.869] | [0.001, 0.001] |
| Toilet: ventilated improved pit   | 0.952          | 0.897          | 0.792**        | 0.961          | 0.968          | 0.931          | 1.595***       | 0.006          |
|                                   | [0.841, 1.078] | [0.785, 1.024] | [0.659, 0.951] | [0.885, 1.044] | [0.746, 1.257] | [0.773, 1.120] | [1.167, 2.179] | [0.005, 0.006] |
| Toilet: pit latrine with slab     | 0.951*         | 0.920***       | 0.919**        | 0.959**        | 1.052          | 0.999          | 0.972          | 0.039          |
|                                   | [0.904, 1.000] | [0.872, 0.970] | [0.853, 0.990] | [0.929, 0.990] | [0.933, 1.187] | [0.922, 1.083] | [0.809, 1.169] | [0.038, 0.041] |
| Toilet: pit without slab/open pit | 0.968          | 0.981          | 1.072          | 0.954          | 1.246*         | 0.983          | 0.866          | 0.011          |
|                                   | [0.879, 1.066] | [0.885, 1.087] | [0.938, 1.225] | [0.884, 1.029] | [0.993, 1.563] | [0.843, 1.146] | [0.603, 1.244] | [0.011, 0.012] |
| Water: tube well or borehole      | RC             | 0.392          |
|                                   |                |                |                |                |                |                |                | [0.386, 0.399] |
| Water: piped into dwelling        | 0.998          | 1.024          | 0.985          | 1.002          | 0.997          | 1.049          | 0.751***       | 0.166          |
|                                   | [0.964, 1.034] | [0.986, 1.063] | [0.937, 1.036] | [0.982, 1.023] | [0.921, 1.079] | [0.991, 1.111] | [0.653, 0.865] | [0.161, 0.171] |
| Water: rainwater                  | 1.204          | 1.031          | 0.829          | 0.873          | 1.143          | 0.974          | 0.977          | 0.002          |
|                                   | [0.922, 1.574] | [0.774, 1.375] | [0.533, 1.289] | [0.711, 1.071] | [0.558, 2.344] | [0.599, 1.584] | [0.336, 2.842] | [0.001, 0.002] |
| Water: tanker truck               | 1.071          | 0.951          | 0.970          | 0.961          | 1.162          | 0.925          | 0.969          | 0.013          |
|                                   | [0.986, 1.164] | [0.871, 1.038] | [0.853, 1.102] | [0.913, 1.011] | [0.952, 1.419] | [0.818, 1.045] | [0.734, 1.279] | [0.011, 0.016] |
| Water: cart with small tank       | 0.755**        | 0.970          | 1.266          | 0.833***       | 0.894          | 0.830          | 1.113          | 0.002          |
|                                   | [0.592, 0.963] | [0.743, 1.267] | [0.932, 1.720] | [0.738, 0.941] | [0.575, 1.390] | [0.590, 1.167] | [0.577, 2.149] | [0.001, 0.002] |
| Water: bottled water              | 0.988          | 0.944*         | 0.897***       | 0.990          | 1.171***       | 0.953          | 0.873          | 0.031          |
|                                   | [0.936, 1.042] | [0.890, 1.000] | [0.829, 0.971] | [0.958, 1.023] | [1.051, 1.304] | [0.879, 1.034] | [0.695, 1.097] | [0.029, 0.033] |
| Water: community RO plant         | 0.958          | 0.845**        | 0.989          | 0.921**        | 1.354**        | 0.945          | 0.940          | 0.005          |
|                                   | [0.847, 1.083] | [0.730, 0.977] | [0.829, 1.181] | [0.853, 0.994] | [1.069, 1.714] | [0.779, 1.146] | [0.622, 1.421] | [0.005, 0.006] |
| Water: other                      | 0.988          | 0.932          | 0.885          | 1.056          | 1.662***       | 0.835          | 1.178          | 0.002          |
|                                   | [0.803, 1.215] | [0.765, 1.136] | [0.622, 1.259] | [0.924, 1.206] | [1.153, 2.397] | [0.539, 1.292] | [0.632, 2.197] | [0.001, 0.002] |
| Water: piped to yard/plot         | 1.035**        | 1.016          | 0.960*         | 0.978**        | 1.037          | 1.037          | 0.883*         | 0.136          |
|                                   | [1.001, 1.069] | [0.982, 1.052] | [0.916, 1.006] | [0.958, 0.998] | [0.962, 1.117] | [0.983, 1.095] | [0.776, 1.006] | [0.132, 0.139] |
| Water: public tap/standpipe       | 1.037**        | 1.019          | 1.027          | 1.003          | 1.067*         | 1.019          | 1.058          | 0.159          |
|                                   | [1.008, 1.067] | [0.989, 1.049] | [0.983, 1.072] | [0.984, 1.021] | [0.994, 1.144] | [0.969, 1.071] | [0.949, 1.179] | [0.155, 0.163] |
| Water: protected well             | 1.031          | 1.036          | 0.984          | 1.048**        | 1.022          | 1.150***       | 0.931          | 0.037          |

|                                        |                |                |                |                |                |                |                 |                |
|----------------------------------------|----------------|----------------|----------------|----------------|----------------|----------------|-----------------|----------------|
| Water: unprotected well                | 0.973          | 0.982          | 1.038          | 0.998          | 0.940          | 1.045          | 0.951           | 0.042          |
|                                        | [0.970, 1.096] | [0.973, 1.102] | [0.906, 1.069] | [1.008, 1.089] | [0.875, 1.193] | [1.047, 1.263] | [0.702, 1.235]  | [0.034, 0.039] |
| Water: protected spring                | 0.903          | 0.943          | 1.044          | 0.977          | 1.135          | 1.072          | 0.610           | 0.003          |
|                                        | [0.935, 1.011] | [0.943, 1.022] | [0.978, 1.101] | [0.972, 1.025] | [0.844, 1.046] | [0.969, 1.128] | [0.816, 1.109]  | [0.041, 0.044] |
| Water: unprotected spring              | 0.949          | 0.905          | 0.887          | 0.959          | 0.893          | 1.146          | 0.940           | 0.004          |
|                                        | [0.679, 1.201] | [0.713, 1.246] | [0.749, 1.456] | [0.823, 1.160] | [0.644, 2.001] | [0.765, 1.502] | [0.162, 2.300]  | [0.003, 0.004] |
| Water: river/dam/lake/ponds etc.       | 0.958          | 0.942          | 1.084          | 0.957          | 1.057          | 1.031          | 0.949           | 0.007          |
|                                        | [0.806, 1.116] | [0.771, 1.061] | [0.702, 1.122] | [0.859, 1.070] | [0.577, 1.381] | [0.910, 1.443] | [0.426, 2.073]  | [0.004, 0.004] |
|                                        | [0.831, 1.106] | [0.815, 1.088] | [0.887, 1.324] | [0.867, 1.057] | [0.715, 1.563] | [0.808, 1.314] | [0.547, 1.646]  | [0.006, 0.007] |
| <b>b) Food storage and preparation</b> |                |                |                |                |                |                |                 |                |
| Refrigerator                           | 0.966**        | 0.951***       | 0.945***       | 0.999          | 1.015          | 0.974          | 0.920           | 0.296          |
|                                        | [0.939, 0.994] | [0.922, 0.980] | [0.908, 0.983] | [0.983, 1.016] | [0.955, 1.078] | [0.934, 1.016] | [0.826, 1.026]  | [0.291, 0.302] |
| Pressure cooker                        | 0.978**        | 0.957***       | 0.995          | 0.982***       | 1.044*         | 0.962**        | 1.022           | 0.566          |
|                                        | [0.959, 0.997] | [0.937, 0.977] | [0.965, 1.027] | [0.970, 0.995] | [0.997, 1.092] | [0.929, 0.998] | [0.950, 1.100]  | [0.561, 0.572] |
| Cooking: wood                          | RC              | 0.405          |
|                                        |                |                |                |                |                |                |                 | [0.399, 0.411] |
| Cooking: electricity                   | 1.095          | 0.997          | 1.054          | 1.041          | 0.915          | 1.004          | 1.708***        | 0.006          |
|                                        | [0.972, 1.235] | [0.867, 1.146] | [0.855, 1.299] | [0.954, 1.137] | [0.668, 1.253] | [0.801, 1.259] | [1.185, 2.464]  | [0.006, 0.007] |
| Cooking: animal dung                   | 1.025**        | 1.035**        | 0.993          | 1.016*         | 1.074**        | 1.024          | 1.096**         | 0.072          |
|                                        | [1.001, 1.050] | [1.008, 1.063] | [0.950, 1.038] | [0.999, 1.033] | [1.014, 1.138] | [0.963, 1.090] | [1.003, 1.198]  | [0.069, 0.074] |
| Cooking: no food cooked in house       | 2.947***       | 4.461***       | 3.057***       | 1.168          | 1.040          | 0.000***       | 3.014           | 0.003          |
|                                        | [1.384, 6.274] | [2.054, 9.692] | [1.372, 6.815] | [0.955, 1.429] | [0.397, 2.721] | [0.000, 0.000] | [0.423, 21.486] | [0.002, 0.003] |
| Cooking: other                         | 1.292          | 1.101          | 0.798          | 1.109          | 1.043          | 1.041          | 0.285           | 0.000          |
|                                        | [0.830, 2.010] | [0.680, 1.784] | [0.423, 1.503] | [0.701, 1.754] | [0.369, 2.946] | [0.463, 2.338] | [0.007, 12.115] | [0.000, 0.001] |
| Cooking: LPG/natural gas               | 0.983          | 0.977          | 0.990          | 1.012          | 1.088***       | 0.980          | 1.059           | 0.423          |
|                                        | [0.958, 1.009] | [0.950, 1.005] | [0.953, 1.029] | [0.995, 1.028] | [1.028, 1.151] | [0.939, 1.022] | [0.961, 1.168]  | [0.416, 0.430] |
| Cooking: biogas                        | 0.914*         | 0.928          | 0.835**        | 1.118***       | 0.688***       | 1.030          | 1.665**         | 0.008          |
|                                        | [0.827, 1.010] | [0.833, 1.033] | [0.717, 0.972] | [1.057, 1.183] | [0.530, 0.894] | [0.890, 1.191] | [1.104, 2.510]  | [0.007, 0.009] |
| Cooking: kerosene                      | 0.982          | 1.067*         | 1.128**        | 0.980          | 0.928          | 1.245***       | 0.988           | 0.012          |
|                                        | [0.912, 1.057] | [0.995, 1.145] | [1.026, 1.241] | [0.937, 1.026] | [0.775, 1.110] | [1.116, 1.389] | [0.719, 1.359]  | [0.011, 0.013] |
| Cooking: coal, lignite                 | 1.041          | 1.081**        | 1.182***       | 0.968          | 1.091          | 0.905          | 0.930           | 0.009          |
|                                        | [0.968, 1.119] | [1.000, 1.167] | [1.055, 1.324] | [0.920, 1.018] | [0.911, 1.307] | [0.764, 1.072] | [0.686, 1.260]  | [0.008, 0.010] |
| Cooking: charcoal                      | 1.009          | 1.033          | 0.902          | 0.983          | 1.059          | 0.820**        | 1.345           | 0.006          |
|                                        | [0.925, 1.101] | [0.950, 1.124] | [0.779, 1.044] | [0.928, 1.042] | [0.828, 1.354] | [0.679, 0.990] | [0.931, 1.944]  | [0.005, 0.006] |
| Cooking: straw/shrubs/grass            | 1.052***       | 1.051***       | 1.034          | 1.038***       | 0.945          | 1.145***       | 1.012           | 0.025          |
|                                        | [1.022, 1.084] | [1.016, 1.087] | [0.979, 1.093] | [1.015, 1.061] | [0.875, 1.020] | [1.064, 1.233] | [0.892, 1.150]  | [0.024, 0.027] |

|                                |                            |                            |                            |                            |                            |                            |                            |                         |
|--------------------------------|----------------------------|----------------------------|----------------------------|----------------------------|----------------------------|----------------------------|----------------------------|-------------------------|
| Cooking: agricultural crop     | 1.040**<br>[1.007, 1.074]  | 1.078***<br>[1.040, 1.118] | 1.048*<br>[0.992, 1.108]   | 1.010<br>[0.987, 1.034]    | 1.070<br>[0.983, 1.164]    | 1.094**<br>[1.008, 1.186]  | 1.060<br>[0.934, 1.203]    | 0.030<br>[0.028, 0.032] |
| <b>c) Other consumer goods</b> |                            |                            |                            |                            |                            |                            |                            |                         |
| Radio                          | 0.975*<br>[0.948, 1.003]   | 0.996<br>[0.966, 1.027]    | 1.011<br>[0.968, 1.055]    | 1.014<br>[0.995, 1.033]    | 1.017<br>[0.955, 1.083]    | 1.065***<br>[1.015, 1.118] | 0.975<br>[0.876, 1.086]    | 0.081<br>[0.080, 0.083] |
| Bicycle                        | 0.968***<br>[0.955, 0.982] | 0.973***<br>[0.958, 0.987] | 1.027**<br>[1.004, 1.050]  | 0.983***<br>[0.974, 0.992] | 0.960**<br>[0.928, 0.994]  | 0.974*<br>[0.948, 1.001]   | 0.989<br>[0.936, 1.045]    | 0.521<br>[0.516, 0.526] |
| Motorcycle/scooter             | 0.954***<br>[0.937, 0.971] | 0.956***<br>[0.938, 0.975] | 0.972**<br>[0.946, 0.999]  | 0.990*<br>[0.979, 1.002]   | 0.935***<br>[0.898, 0.973] | 0.975<br>[0.945, 1.005]    | 0.893***<br>[0.836, 0.954] | 0.377<br>[0.372, 0.381] |
| Car/truck                      | 0.923***<br>[0.875, 0.974] | 0.891***<br>[0.842, 0.942] | 0.935**<br>[0.879, 0.995]  | 0.981<br>[0.953, 1.009]    | 0.936<br>[0.847, 1.034]    | 1.024<br>[0.958, 1.095]    | 1.001<br>[0.836, 1.199]    | 0.060<br>[0.058, 0.063] |
| Telephone (land-line)          | 0.930**<br>[0.872, 0.993]  | 1.010<br>[0.946, 1.078]    | 1.039<br>[0.969, 1.114]    | 0.976<br>[0.943, 1.011]    | 0.949<br>[0.837, 1.076]    | 1.051<br>[0.967, 1.142]    | 0.862<br>[0.695, 1.068]    | 0.039<br>[0.037, 0.041] |
| Mobile telephone               | 0.960***<br>[0.939, 0.982] | 0.939***<br>[0.917, 0.962] | 0.920***<br>[0.885, 0.956] | 0.976***<br>[0.959, 0.992] | 1.002<br>[0.938, 1.070]    | 0.905***<br>[0.861, 0.952] | 1.024<br>[0.932, 1.126]    | 0.904<br>[0.902, 0.906] |
| Watch                          | 0.986*<br>[0.971, 1.002]   | 1.005<br>[0.988, 1.022]    | 1.012<br>[0.985, 1.040]    | 0.982***<br>[0.971, 0.993] | 0.967<br>[0.928, 1.008]    | 1.012<br>[0.977, 1.047]    | 0.934**<br>[0.877, 0.996]  | 0.781<br>[0.778, 0.785] |
| Mattress                       | 0.988<br>[0.971, 1.004]    | 0.998<br>[0.980, 1.016]    | 0.984<br>[0.958, 1.011]    | 0.991<br>[0.980, 1.002]    | 0.971<br>[0.932, 1.012]    | 0.993<br>[0.961, 1.026]    | 1.015<br>[0.952, 1.083]    | 0.667<br>[0.662, 0.672] |
| Chair                          | 0.990<br>[0.974, 1.006]    | 0.992<br>[0.975, 1.010]    | 0.985<br>[0.959, 1.013]    | 0.991<br>[0.980, 1.002]    | 0.951**<br>[0.912, 0.992]  | 0.964**<br>[0.931, 0.998]  | 0.974<br>[0.913, 1.039]    | 0.762<br>[0.758, 0.765] |
| Cot/bed                        | 1.006<br>[0.984, 1.029]    | 0.990<br>[0.968, 1.014]    | 0.971*<br>[0.939, 1.004]   | 1.006<br>[0.991, 1.021]    | 0.926***<br>[0.874, 0.982] | 0.997<br>[0.957, 1.038]    | 0.858***<br>[0.782, 0.941] | 0.884<br>[0.881, 0.887] |
| Table                          | 1.013<br>[0.996, 1.030]    | 1.005<br>[0.987, 1.024]    | 0.972**<br>[0.946, 0.998]  | 0.988**<br>[0.977, 1.000]  | 0.896***<br>[0.861, 0.932] | 0.972*<br>[0.942, 1.003]   | 1.027<br>[0.963, 1.097]    | 0.554<br>[0.550, 0.559] |
| Electric fan                   | 0.974**<br>[0.954, 0.995]  | 0.972**<br>[0.950, 0.994]  | 0.955**<br>[0.922, 0.990]  | 0.989<br>[0.975, 1.005]    | 0.972<br>[0.921, 1.025]    | 0.987<br>[0.943, 1.033]    | 0.918**<br>[0.845, 0.998]  | 0.782<br>[0.777, 0.786] |
| Black and white television     | 0.974<br>[0.938, 1.010]    | 0.959**<br>[0.922, 0.998]  | 0.938**<br>[0.886, 0.993]  | 0.983<br>[0.961, 1.006]    | 1.046<br>[0.967, 1.131]    | 1.106***<br>[1.038, 1.179] | 1.003<br>[0.882, 1.140]    | 0.033<br>[0.032, 0.034] |
| Color television               | 0.984<br>[0.965, 1.003]    | 0.982*<br>[0.962, 1.003]   | 1.003<br>[0.974, 1.034]    | 0.993<br>[0.981, 1.006]    | 0.974<br>[0.930, 1.020]    | 0.952***<br>[0.918, 0.988] | 0.946<br>[0.879, 1.018]    | 0.635<br>[0.630, 0.640] |
| Sewing machine                 | 0.980**<br>[0.961, 1.000]  | 0.989<br>[0.969, 1.010]    | 1.001<br>[0.973, 1.030]    | 0.991<br>[0.979, 1.003]    | 1.012<br>[0.970, 1.055]    | 0.984<br>[0.951, 1.018]    | 0.912**<br>[0.848, 0.982]  | 0.240<br>[0.237, 0.243] |
| Computer                       | 1.009<br>[0.963, 1.058]    | 0.941**<br>[0.896, 0.988]  | 0.985<br>[0.931, 1.042]    | 0.951***<br>[0.927, 0.976] | 0.966<br>[0.888, 1.051]    | 0.947*<br>[0.889, 1.008]   | 0.851*<br>[0.712, 1.017]   | 0.090<br>[0.087, 0.093] |
| Air conditioner/cooler         | 1.021                      | 1.033**                    | 1.010                      | 0.999                      | 1.086***                   | 0.986                      | 0.911*                     | 0.179                   |

|                                     |                          |                         |                            |                           |                         |                         |                           |                         |
|-------------------------------------|--------------------------|-------------------------|----------------------------|---------------------------|-------------------------|-------------------------|---------------------------|-------------------------|
| Washing machine                     | [0.993, 1.050]<br>0.962* | [1.002, 1.064]<br>0.972 | [0.971, 1.051]<br>0.922*** | [0.983, 1.015]<br>0.977** | [1.026, 1.149]<br>1.022 | [0.944, 1.030]<br>0.966 | [0.824, 1.007]<br>0.862** | [0.175, 0.183]<br>0.136 |
|                                     | [0.922, 1.003]           | [0.930, 1.015]          | [0.876, 0.971]             | [0.956, 0.999]            | [0.946, 1.105]          | [0.914, 1.021]          | [0.744, 1.000]            | [0.132, 0.140]          |
| <b>d) Housing quality</b>           |                          |                         |                            |                           |                         |                         |                           |                         |
| Residents per bedroom               | 1.008***                 | 1.006***                | 0.996                      | 1.000                     | 1.002                   | 1.001                   | 0.733***                  | 2.917                   |
|                                     | [1.004, 1.012]           | [1.001, 1.010]          | [0.989, 1.002]             | [0.997, 1.002]            | [0.992, 1.012]          | [0.993, 1.009]          | [0.718, 0.749]            | [2.905, 2.929]          |
| Floor: cement                       | RC                       | RC                      | RC                         | RC                        | RC                      | RC                      | RC                        | 0.393                   |
|                                     |                          |                         |                            |                           |                         |                         |                           | [0.388, 0.397]          |
| Floor: mud/clay/earth               | 1.010                    | 0.989                   | 0.985                      | 1.000                     | 0.994                   | 1.004                   | 1.059                     | 0.271                   |
|                                     | [0.987, 1.034]           | [0.965, 1.015]          | [0.948, 1.023]             | [0.984, 1.016]            | [0.939, 1.052]          | [0.959, 1.051]          | [0.965, 1.162]            | [0.266, 0.276]          |
| Floor: ceramic tiles                | 1.050***                 | 0.971*                  | 0.966                      | 0.985                     | 0.947                   | 1.027                   | 1.018                     | 0.106                   |
|                                     | [1.015, 1.086]           | [0.937, 1.006]          | [0.924, 1.010]             | [0.966, 1.004]            | [0.880, 1.019]          | [0.981, 1.076]          | [0.889, 1.167]            | [0.102, 0.110]          |
| Floor: carpet                       | 1.046                    | 1.011                   | 1.069                      | 1.071*                    | 0.982                   | 1.176*                  | 0.792                     | 0.006                   |
|                                     | [0.920, 1.189]           | [0.886, 1.153]          | [0.919, 1.244]             | [0.994, 1.154]            | [0.749, 1.288]          | [0.995, 1.390]          | [0.416, 1.506]            | [0.005, 0.006]          |
| Floor: polished stone/marble/grani. | 0.975                    | 0.927***                | 0.965                      | 0.959***                  | 0.857***                | 0.945*                  | 1.026                     | 0.077                   |
|                                     | [0.936, 1.016]           | [0.887, 0.968]          | [0.916, 1.017]             | [0.938, 0.981]            | [0.788, 0.932]          | [0.892, 1.001]          | [0.872, 1.206]            | [0.074, 0.080]          |
| Floor: other                        | 0.722                    | 0.704                   | 1.062                      | 0.914                     | 0.948                   | 0.946                   | 1.612                     | 0.001                   |
|                                     | [0.473, 1.103]           | [0.447, 1.109]          | [0.636, 1.776]             | [0.693, 1.205]            | [0.402, 2.234]          | [0.513, 1.746]          | [0.418, 6.223]            | [0.001, 0.001]          |
| Floor: sand                         | 1.038                    | 1.073*                  | 1.047                      | 0.960                     | 1.382***                | 1.010                   | 1.088                     | 0.007                   |
|                                     | [0.965, 1.116]           | [0.994, 1.158]          | [0.933, 1.175]             | [0.914, 1.009]            | [1.159, 1.647]          | [0.876, 1.164]          | [0.818, 1.449]            | [0.007, 0.007]          |
| Floor: dung                         | 1.011                    | 0.993                   | 0.949**                    | 1.011                     | 0.972                   | 0.991                   | 1.040                     | 0.070                   |
|                                     | [0.980, 1.043]           | [0.960, 1.026]          | [0.901, 0.999]             | [0.990, 1.032]            | [0.901, 1.048]          | [0.930, 1.056]          | [0.927, 1.167]            | [0.068, 0.072]          |
| Floor: raw wood planks              | 0.939                    | 0.917                   | 0.987                      | 0.841                     | 1.196                   | 1.223                   | 1.168                     | 0.002                   |
|                                     | [0.669, 1.317]           | [0.606, 1.389]          | [0.572, 1.704]             | [0.646, 1.096]            | [0.551, 2.597]          | [0.716, 2.090]          | [0.363, 3.753]            | [0.002, 0.003]          |
| Floor: palm/bamboo                  | 0.925                    | 0.933                   | 0.984                      | 0.957                     | 1.152                   | 0.869                   | 1.105                     | 0.002                   |
|                                     | [0.657, 1.302]           | [0.665, 1.309]          | [0.621, 1.559]             | [0.744, 1.230]            | [0.576, 2.305]          | [0.537, 1.407]          | [0.395, 3.092]            | [0.002, 0.002]          |
| Floor: brick                        | 1.005                    | 1.057                   | 1.050                      | 0.971                     | 1.090                   | 0.962                   | 1.127                     | 0.008                   |
|                                     | [0.932, 1.083]           | [0.976, 1.144]          | [0.933, 1.183]             | [0.928, 1.016]            | [0.928, 1.281]          | [0.834, 1.110]          | [0.839, 1.514]            | [0.007, 0.008]          |
| Floor: stone                        | 1.007                    | 0.954**                 | 0.933**                    | 0.965***                  | 0.808***                | 0.900***                | 1.100                     | 0.055                   |
|                                     | [0.968, 1.047]           | [0.915, 0.994]          | [0.880, 0.990]             | [0.941, 0.989]            | [0.731, 0.892]          | [0.846, 0.958]          | [0.944, 1.282]            | [0.052, 0.057]          |
| Floor: parquet/polished wood        | 1.065                    | 0.936                   | 1.263                      | 0.960                     | 1.289                   | 0.828                   | 0.580                     | 0.002                   |
|                                     | [0.828, 1.371]           | [0.699, 1.252]          | [0.917, 1.740]             | [0.795, 1.160]            | [0.807, 2.061]          | [0.538, 1.273]          | [0.112, 3.009]            | [0.002, 0.002]          |
| Floor: vinyl/asphalt strips         | 1.310                    | 1.404*                  | 1.690***                   | 0.886                     | 2.212*                  | 0.927                   | 0.527                     | 0.002                   |
|                                     | [0.856, 2.004]           | [0.982, 2.007]          | [1.174, 2.431]             | [0.684, 1.147]            | [0.960, 5.093]          | [0.557, 1.543]          | [0.031, 9.112]            | [0.001, 0.002]          |
| Roof: RCC/RBC/cement/concrete       | RC                       | RC                      | RC                         | RC                        | RC                      | RC                      | RC                        | 0.413                   |
|                                     |                          |                         |                            |                           |                         |                         |                           | [0.408, 0.419]          |

|                                  |                           |                           |                            |                            |                            |                            |                           |                         |
|----------------------------------|---------------------------|---------------------------|----------------------------|----------------------------|----------------------------|----------------------------|---------------------------|-------------------------|
| Roof: no roof                    | 1.077<br>[0.962, 1.206]   | 1.113*<br>[0.985, 1.258]  | 1.034<br>[0.846, 1.263]    | 0.926*<br>[0.846, 1.012]   | 0.956<br>[0.727, 1.257]    | 1.062<br>[0.849, 1.329]    | 0.963<br>[0.577, 1.609]   | 0.002<br>[0.002, 0.002] |
| Roof: loosely packed stone       | 1.037<br>[0.986, 1.091]   | 1.041<br>[0.986, 1.098]   | 1.018<br>[0.936, 1.108]    | 0.973<br>[0.941, 1.007]    | 0.961<br>[0.848, 1.088]    | 1.005<br>[0.914, 1.105]    | 1.046<br>[0.867, 1.261]   | 0.023<br>[0.022, 0.025] |
| Roof: metal/GI                   | 0.985<br>[0.953, 1.019]   | 1.012<br>[0.978, 1.046]   | 1.031<br>[0.981, 1.083]    | 1.018<br>[0.996, 1.040]    | 1.093**<br>[1.006, 1.188]  | 0.962<br>[0.908, 1.020]    | 1.075<br>[0.937, 1.233]   | 0.110<br>[0.106, 0.113] |
| Roof: wood                       | 0.992<br>[0.933, 1.056]   | 1.048<br>[0.984, 1.117]   | 0.943<br>[0.853, 1.043]    | 0.962*<br>[0.924, 1.001]   | 1.005<br>[0.864, 1.168]    | 1.040<br>[0.922, 1.172]    | 1.198<br>[0.957, 1.500]   | 0.012<br>[0.011, 0.012] |
| Roof: calamine/cement fiber      | 1.040*<br>[0.999, 1.082]  | 1.025<br>[0.982, 1.071]   | 1.022<br>[0.960, 1.087]    | 1.039***<br>[1.012, 1.066] | 1.045<br>[0.949, 1.151]    | 1.100**<br>[1.020, 1.186]  | 1.035<br>[0.877, 1.221]   | 0.028<br>[0.027, 0.030] |
| Roof: asbestos sheets            | 0.979<br>[0.953, 1.006]   | 0.975*<br>[0.948, 1.003]  | 0.961*<br>[0.922, 1.001]   | 1.015*<br>[0.998, 1.033]   | 0.975<br>[0.914, 1.040]    | 1.073***<br>[1.021, 1.127] | 1.040<br>[0.937, 1.155]   | 0.076<br>[0.073, 0.078] |
| Roof: roofing shingles           | 0.953*<br>[0.902, 1.006]  | 0.961<br>[0.910, 1.016]   | 0.988<br>[0.912, 1.070]    | 0.961**<br>[0.930, 0.992]  | 1.111<br>[0.965, 1.279]    | 0.956<br>[0.864, 1.059]    | 1.185<br>[0.961, 1.461]   | 0.020<br>[0.019, 0.021] |
| Roof: tiles                      | 1.038**<br>[1.007, 1.069] | 1.013<br>[0.981, 1.047]   | 1.014<br>[0.968, 1.062]    | 1.006<br>[0.986, 1.026]    | 1.046<br>[0.966, 1.131]    | 1.071**<br>[1.012, 1.133]  | 1.150**<br>[1.014, 1.304] | 0.071<br>[0.068, 0.073] |
| Roof: slate                      | 0.990<br>[0.960, 1.020]   | 0.990<br>[0.958, 1.023]   | 0.977<br>[0.930, 1.026]    | 0.992<br>[0.973, 1.012]    | 0.926**<br>[0.858, 0.999]  | 1.002<br>[0.947, 1.059]    | 1.101*<br>[0.982, 1.234]  | 0.081<br>[0.079, 0.084] |
| Roof: burnt brick                | 1.014<br>[0.981, 1.047]   | 0.992<br>[0.956, 1.031]   | 0.989<br>[0.929, 1.052]    | 0.989<br>[0.966, 1.013]    | 0.989<br>[0.913, 1.071]    | 1.028<br>[0.950, 1.112]    | 1.035<br>[0.921, 1.163]   | 0.045<br>[0.043, 0.047] |
| Roof: thatch/palm leaf           | 0.996<br>[0.968, 1.025]   | 1.004<br>[0.972, 1.037]   | 1.001<br>[0.950, 1.056]    | 1.006<br>[0.985, 1.028]    | 1.000<br>[0.930, 1.075]    | 1.005<br>[0.940, 1.074]    | 1.009<br>[0.901, 1.129]   | 0.045<br>[0.043, 0.046] |
| Roof: other                      | 1.004<br>[0.949, 1.062]   | 1.069**<br>[1.006, 1.135] | 1.061<br>[0.968, 1.163]    | 0.987<br>[0.953, 1.022]    | 0.907<br>[0.802, 1.026]    | 1.091<br>[0.975, 1.221]    | 1.256**<br>[1.037, 1.521] | 0.029<br>[0.027, 0.031] |
| Roof: mud                        | 1.058*<br>[0.993, 1.127]  | 1.012<br>[0.945, 1.083]   | 0.909*<br>[0.812, 1.017]   | 0.971<br>[0.926, 1.017]    | 1.056<br>[0.892, 1.250]    | 0.958<br>[0.835, 1.099]    | 0.993<br>[0.769, 1.284]   | 0.009<br>[0.008, 0.009] |
| Roof: sod/mud and grass mixture  | 1.040<br>[0.990, 1.092]   | 0.994<br>[0.939, 1.052]   | 1.032<br>[0.942, 1.132]    | 1.033*<br>[0.995, 1.073]   | 1.024<br>[0.897, 1.169]    | 1.081<br>[0.949, 1.231]    | 0.956<br>[0.777, 1.177]   | 0.009<br>[0.009, 0.010] |
| Roof: plastic/polythene sheeting | 1.059*<br>[0.995, 1.126]  | 1.037<br>[0.969, 1.110]   | 1.148***<br>[1.040, 1.268] | 1.052**<br>[1.006, 1.100]  | 1.134<br>[0.960, 1.339]    | 1.170**<br>[1.023, 1.337]  | 1.274*<br>[0.963, 1.687]  | 0.008<br>[0.007, 0.008] |
| Roof: rustic mat                 | 0.923<br>[0.786, 1.085]   | 0.889<br>[0.722, 1.094]   | 1.336**<br>[1.024, 1.744]  | 0.996<br>[0.875, 1.134]    | 1.061<br>[0.755, 1.489]    | 1.055<br>[0.702, 1.586]    | 0.594<br>[0.308, 1.147]   | 0.001<br>[0.001, 0.001] |
| Roof: palm/bamboo                | 1.010<br>[0.956, 1.067]   | 1.017<br>[0.957, 1.080]   | 1.049<br>[0.949, 1.160]    | 1.005<br>[0.966, 1.046]    | 1.087<br>[0.953, 1.241]    | 0.974<br>[0.850, 1.117]    | 1.135<br>[0.928, 1.387]   | 0.007<br>[0.007, 0.008] |
| Roof: raw wood planks/timber     | 1.020<br>[0.941, 1.106]   | 0.961<br>[0.878, 1.051]   | 1.122*<br>[0.983, 1.281]   | 1.022<br>[0.972, 1.074]    | 1.299***<br>[1.078, 1.566] | 0.929<br>[0.779, 1.107]    | 1.073<br>[0.749, 1.535]   | 0.006<br>[0.006, 0.007] |

|                                |                |                |                |                |                |                |                |                |
|--------------------------------|----------------|----------------|----------------|----------------|----------------|----------------|----------------|----------------|
| Roof: unburnt bricks           | 1.072*         | 1.042          | 1.052          | 1.051*         | 1.145          | 1.085          | 1.204          | 0.005          |
|                                | [0.994, 1.155] | [0.955, 1.137] | [0.932, 1.188] | [0.996, 1.109] | [0.953, 1.377] | [0.936, 1.257] | [0.887, 1.634] | [0.005, 0.005] |
| Wall: cement/concrete          | RC             | 0.379          |
|                                |                |                |                |                |                |                |                | [0.373, 0.385] |
| Wall: no walls                 | 1.118**        | 1.169***       | 1.042          | 0.946          | 0.922          | 0.750***       | 0.771          | 0.003          |
|                                | [1.010, 1.237] | [1.051, 1.300] | [0.874, 1.243] | [0.876, 1.021] | [0.718, 1.184] | [0.606, 0.929] | [0.454, 1.307] | [0.003, 0.004] |
| Wall: raw/reused wood          | 1.045          | 0.958          | 1.010          | 1.019          | 0.948          | 1.233          | 1.148          | 0.003          |
|                                | [0.846, 1.290] | [0.754, 1.217] | [0.716, 1.424] | [0.859, 1.208] | [0.583, 1.539] | [0.880, 1.729] | [0.480, 2.746] | [0.002, 0.003] |
| Wall: stone with lime/cement   | 0.999          | 0.994          | 1.057**        | 1.040***       | 0.986          | 1.078**        | 1.085          | 0.059          |
|                                | [0.959, 1.042] | [0.952, 1.037] | [1.000, 1.118] | [1.014, 1.067] | [0.889, 1.094] | [1.013, 1.148] | [0.927, 1.271] | [0.057, 0.061] |
| Wall: burnt bricks             | 1.009          | 1.000          | 1.014          | 1.004          | 0.958          | 1.014          | 1.061          | 0.252          |
|                                | [0.985, 1.032] | [0.975, 1.026] | [0.978, 1.051] | [0.989, 1.019] | [0.910, 1.009] | [0.972, 1.058] | [0.974, 1.156] | [0.247, 0.257] |
| Wall: cement blocks            | 0.988          | 1.008          | 1.075***       | 0.995          | 1.030          | 1.088***       | 1.210***       | 0.058          |
|                                | [0.952, 1.025] | [0.970, 1.047] | [1.020, 1.132] | [0.972, 1.018] | [0.950, 1.117] | [1.028, 1.152] | [1.049, 1.396] | [0.055, 0.060] |
| Wall: wood planks/shingles     | 0.941          | 0.895          | 0.890          | 0.961          | 1.089          | 1.031          | 1.278          | 0.002          |
|                                | [0.765, 1.157] | [0.703, 1.140] | [0.615, 1.290] | [0.835, 1.107] | [0.691, 1.717] | [0.719, 1.477] | [0.577, 2.830] | [0.002, 0.002] |
| Wall: GI/metal/asbestos sheets | 1.132***       | 0.959          | 1.059          | 1.065*         | 1.476***       | 0.955          | 1.660**        | 0.010          |
|                                | [1.031, 1.243] | [0.869, 1.059] | [0.922, 1.215] | [0.997, 1.137] | [1.165, 1.869] | [0.825, 1.105] | [1.081, 2.551] | [0.009, 0.011] |
| Wall: other                    | 0.877          | 0.972          | 1.011          | 1.010          | 1.385*         | 0.939          | 0.510          | 0.002          |
|                                | [0.746, 1.031] | [0.835, 1.132] | [0.822, 1.243] | [0.913, 1.116] | [0.979, 1.960] | [0.726, 1.216] | [0.223, 1.170] | [0.002, 0.002] |
| Wall: cane/palm/trunks         | 0.977          | 1.025          | 1.144***       | 1.002          | 0.973          | 1.015          | 1.023          | 0.016          |
|                                | [0.923, 1.034] | [0.965, 1.088] | [1.041, 1.257] | [0.962, 1.045] | [0.839, 1.127] | [0.898, 1.147] | [0.827, 1.267] | [0.015, 0.017] |
| Wall: mud                      | 0.975*         | 0.980          | 1.019          | 1.030***       | 0.994          | 1.034          | 1.070          | 0.136          |
|                                | [0.948, 1.003] | [0.952, 1.010] | [0.976, 1.065] | [1.011, 1.049] | [0.927, 1.065] | [0.982, 1.089] | [0.962, 1.191] | [0.132, 0.139] |
| Wall: grass/reeds/thatch       | 1.062**        | 1.050*         | 0.958          | 0.996          | 1.017          | 1.147**        | 0.993          | 0.009          |
|                                | [1.010, 1.118] | [0.992, 1.111] | [0.869, 1.057] | [0.960, 1.034] | [0.903, 1.144] | [1.007, 1.307] | [0.813, 1.214] | [0.008, 0.009] |
| Wall: bamboo with mud          | 1.043*         | 1.049*         | 1.040          | 1.009          | 1.005          | 0.941          | 1.218**        | 0.028          |
|                                | [0.997, 1.092] | [1.000, 1.100] | [0.966, 1.120] | [0.975, 1.043] | [0.891, 1.134] | [0.844, 1.049] | [1.023, 1.451] | [0.027, 0.029] |
| Wall: stone with mud           | 1.012          | 1.030          | 1.114***       | 0.992          | 0.929          | 1.036          | 1.234*         | 0.021          |
|                                | [0.959, 1.068] | [0.974, 1.089] | [1.027, 1.208] | [0.958, 1.028] | [0.792, 1.090] | [0.939, 1.142] | [0.991, 1.536] | [0.020, 0.022] |
| Wall: plywood                  | 0.962          | 0.839          | 0.993          | 1.145          | 1.835          | 1.130          | 0.269          | 0.001          |
|                                | [0.709, 1.305] | [0.571, 1.231] | [0.604, 1.635] | [0.890, 1.472] | [0.819, 4.108] | [0.594, 2.149] | [0.018, 3.932] | [0.001, 0.001] |
| Wall: cardboard                | 1.059          | 0.974          | 0.922          | 0.849*         | 0.720          | 0.944          | 0.746          | 0.001          |
|                                | [0.861, 1.303] | [0.785, 1.208] | [0.626, 1.358] | [0.708, 1.019] | [0.414, 1.250] | [0.645, 1.381] | [0.307, 1.815] | [0.001, 0.001] |
| Wall: unburnt brick            | 1.036          | 1.000          | 0.977          | 1.037**        | 0.915          | 0.964          | 1.256***       | 0.021          |
|                                | [0.993, 1.081] | [0.954, 1.048] | [0.910, 1.048] | [1.008, 1.067] | [0.818, 1.023] | [0.888, 1.048] | [1.059, 1.489] | [0.020, 0.022] |

**e) Other**

|                               |                            |                            |                            |                            |                            |                            |                         |                         |
|-------------------------------|----------------------------|----------------------------|----------------------------|----------------------------|----------------------------|----------------------------|-------------------------|-------------------------|
| Staff                         | 0.836<br>[0.533, 1.312]    | 0.930<br>[0.592, 1.459]    | 0.922<br>[0.546, 1.555]    | 0.979<br>[0.810, 1.184]    | 1.114<br>[0.619, 2.005]    | 0.948<br>[0.545, 1.647]    | 1.433<br>[0.629, 3.264] | 0.002<br>[0.001, 0.002] |
| Bank account                  | 0.968***<br>[0.950, 0.986] | 0.977**<br>[0.957, 0.996]  | 0.971*<br>[0.941, 1.001]   | 0.983***<br>[0.970, 0.995] | 1.068***<br>[1.017, 1.122] | 0.933***<br>[0.896, 0.970] | 0.965<br>[0.894, 1.043] | 0.895<br>[0.893, 0.897] |
| Electricity                   | 0.981*<br>[0.962, 1.001]   | 0.970***<br>[0.949, 0.992] | 0.967*<br>[0.933, 1.003]   | 0.993<br>[0.978, 1.008]    | 1.000<br>[0.948, 1.054]    | 0.996<br>[0.945, 1.049]    | 0.953<br>[0.880, 1.032] | 0.882<br>[0.879, 0.885] |
| Animal-drawn cart             | 0.978<br>[0.945, 1.011]    | 1.009<br>[0.975, 1.045]    | 1.012<br>[0.963, 1.064]    | 1.010<br>[0.988, 1.032]    | 0.957<br>[0.885, 1.035]    | 0.985<br>[0.925, 1.050]    | 1.014<br>[0.891, 1.154] | 0.036<br>[0.035, 0.037] |
| Land usable for agriculture   | 0.980***<br>[0.966, 0.995] | 0.950***<br>[0.935, 0.965] | 0.955***<br>[0.932, 0.978] | 0.973***<br>[0.963, 0.983] | 0.949***<br>[0.915, 0.985] | 0.976<br>[0.947, 1.006]    | 0.966<br>[0.912, 1.023] | 0.389<br>[0.384, 0.394] |
| Internet                      | 1.024<br>[0.987, 1.062]    | 0.964*<br>[0.928, 1.003]   | 0.932***<br>[0.886, 0.979] | 0.988<br>[0.967, 1.009]    | 0.991<br>[0.924, 1.064]    | 0.950*<br>[0.900, 1.003]   | 0.928<br>[0.809, 1.064] | 0.109<br>[0.106, 0.112] |
| Thresher                      | 1.008<br>[0.955, 1.064]    | 1.041<br>[0.984, 1.102]    | 1.124***<br>[1.041, 1.214] | 1.006<br>[0.973, 1.041]    | 1.042<br>[0.939, 1.156]    | 1.013<br>[0.921, 1.114]    | 1.137<br>[0.950, 1.361] | 0.015<br>[0.014, 0.015] |
| Tractor                       | 0.992<br>[0.951, 1.035]    | 0.982<br>[0.937, 1.028]    | 0.970<br>[0.912, 1.033]    | 1.029**<br>[1.003, 1.055]  | 1.032<br>[0.948, 1.124]    | 0.994<br>[0.923, 1.072]    | 0.925<br>[0.804, 1.063] | 0.025<br>[0.024, 0.025] |
| Household member owns a house | 1.010<br>[0.991, 1.030]    | 0.991<br>[0.971, 1.011]    | 0.989<br>[0.961, 1.019]    | 0.986**<br>[0.974, 0.998]  | 0.996<br>[0.951, 1.042]    | 0.943***<br>[0.912, 0.976] | 0.974<br>[0.905, 1.049] | 0.798<br>[0.794, 0.803] |
| Observations                  | 185,529                    | 179,341                    | 157,464                    | 181,977                    | 110,384                    | 118,263                    | 86,172                  | 601,509                 |

Notes: \*\*\* p<0.01, \*\* p<0.05, \* p<0.1. Prevalence ratios are shown. All estimates were weighted and tests for statistical significance and 95% confidence intervals (shown in brackets) were calculated using robust standard errors. Estimates for each wealth index item were obtained from separated models  $poisson(y_{i hp} = 1) = \beta_j w_{jh} + \gamma' x_{ih} + \mu_p$ . Control variables: sex, age, maternal age at birth, birth order, birth interval, firstborn, twin, vaccination status (except for mortality and low birth weight), born at home, maternal education, caste/tribe, and wealth index quintiles. Models were further adjusted for unobserved PSU-level factors. Proportions are for all households interviewed. Acronyms and abbreviations: liquefied petroleum gas (LPG), reinforced cement concrete (RCC), reinforced brick concrete (RBC), galvanized iron (GI), granite (grani.), shared (sh.), sewer system (sewer s.), without (w/o), with(w/), reverse osmosis (RO), reference category (RC).

Table A3. Results from conditional Poisson models. District fixed effects instead of PSU fixed effects.

|                                       | Stunting                   | Underweight                | Wasting                    | Anemia                     | Diarrhea                  | Low birth weight           | Mortality                  | Proportion (households) |
|---------------------------------------|----------------------------|----------------------------|----------------------------|----------------------------|---------------------------|----------------------------|----------------------------|-------------------------|
| <b>a) Water and toilet facilities</b> |                            |                            |                            |                            |                           |                            |                            |                         |
| Water pump                            | 0.979**<br>[0.959, 0.999]  | 0.993<br>[0.971, 1.015]    | 1.007<br>[0.976, 1.039]    | 1.001<br>[0.988, 1.014]    | 1.004<br>[0.953, 1.058]   | 0.951***<br>[0.920, 0.983] | 0.960<br>[0.900, 1.024]    | 0.172<br>[0.169, 0.176] |
| Toilet: no facility/bush/field        | RC                         | RC                         | RC                         | RC                         | RC                        | RC                         | RC                         | 0.389<br>[0.383, 0.395] |
| Toilet: flush to piped sewer system   | 0.958**<br>[0.921, 0.996]  | 0.983<br>[0.942, 1.024]    | 0.992<br>[0.945, 1.041]    | 0.969***<br>[0.946, 0.992] | 0.957<br>[0.872, 1.049]   | 0.917***<br>[0.865, 0.973] | 0.754***<br>[0.645, 0.881] | 0.078<br>[0.074, 0.083] |
| Toilet: composting toilet             | 1.018<br>[0.789, 1.315]    | 1.095<br>[0.846, 1.419]    | 1.222<br>[0.861, 1.733]    | 0.989<br>[0.786, 1.245]    | 0.945<br>[0.508, 1.756]   | 0.877<br>[0.531, 1.447]    | 0.412<br>[0.058, 2.934]    | 0.001<br>[0.001, 0.001] |
| Toilet: dry toilet                    | 0.790**<br>[0.653, 0.955]  | 0.777**<br>[0.630, 0.958]  | 0.944<br>[0.722, 1.234]    | 0.930<br>[0.828, 1.045]    | 0.919<br>[0.598, 1.412]   | 1.408***<br>[1.122, 1.766] | 1.366<br>[0.887, 2.102]    | 0.004<br>[0.003, 0.004] |
| Toilet: other                         | 1.026<br>[0.807, 1.304]    | 0.887<br>[0.725, 1.084]    | 0.972<br>[0.694, 1.362]    | 1.022<br>[0.922, 1.133]    | 0.785<br>[0.380, 1.621]   | 1.217<br>[0.896, 1.652]    | 0.159<br>[0.011, 2.229]    | 0.001<br>[0.001, 0.001] |
| Toilet: sh. Flush to piped sewer s.   | 1.083***<br>[1.023, 1.146] | 1.076***<br>[1.020, 1.135] | 0.924*<br>[0.844, 1.012]   | 1.062***<br>[1.020, 1.105] | 1.031<br>[0.899, 1.181]   | 0.958<br>[0.880, 1.044]    | 1.115<br>[0.862, 1.442]    | 0.012<br>[0.010, 0.013] |
| Toilet: shared flush to septic tank   | 0.966**<br>[0.938, 0.996]  | 0.983<br>[0.952, 1.015]    | 0.938***<br>[0.895, 0.984] | 0.987<br>[0.969, 1.006]    | 1.074**<br>[1.006, 1.146] | 1.034<br>[0.984, 1.085]    | 1.047<br>[0.940, 1.167]    | 0.054<br>[0.052, 0.057] |
| Toilet: shared flush to pit latrine   | 0.964<br>[0.912, 1.019]    | 0.935**<br>[0.886, 0.986]  | 0.952<br>[0.879, 1.032]    | 0.993<br>[0.958, 1.029]    | 1.012<br>[0.883, 1.160]   | 0.958<br>[0.873, 1.052]    | 1.148<br>[0.970, 1.359]    | 0.014<br>[0.013, 0.015] |
| Toilet: sh. Flush to somewhere else   | 0.789***<br>[0.673, 0.925] | 1.128***<br>[1.033, 1.231] | 1.312***<br>[1.162, 1.482] | 0.860***<br>[0.802, 0.923] | 1.259**<br>[1.009, 1.570] | 1.440***<br>[1.290, 1.609] | 1.524**<br>[1.028, 2.259]  | 0.004<br>[0.003, 0.005] |
| Toilet: sh. Flush don't know where    | 1.012<br>[0.805, 1.271]    | 1.183<br>[0.962, 1.454]    | 1.505***<br>[1.183, 1.914] | 1.012<br>[0.831, 1.233]    | 0.316<br>[0.050, 1.987]   | 0.706<br>[0.422, 1.181]    | 1.326<br>[0.677, 2.600]    | 0.000<br>[0.000, 0.000] |
| Toilet: sh. Ventilated improved pit   | 0.880<br>[0.705, 1.097]    | 0.784*<br>[0.614, 1.003]   | 0.859<br>[0.646, 1.141]    | 1.079<br>[0.964, 1.208]    | 0.946<br>[0.555, 1.614]   | 1.188<br>[0.898, 1.572]    | 1.003<br>[0.507, 1.986]    | 0.001<br>[0.001, 0.002] |
| Toilet: shared pit latrine w/ slab    | 1.016<br>[0.953, 1.084]    | 1.044<br>[0.979, 1.114]    | 0.939<br>[0.845, 1.043]    | 0.969<br>[0.921, 1.019]    | 0.903<br>[0.707, 1.152]   | 1.028<br>[0.920, 1.148]    | 0.998<br>[0.778, 1.280]    | 0.009<br>[0.009, 0.010] |
| Toilet: flush to septic tank          | 0.947***<br>[0.926, 0.969] | 0.948***<br>[0.927, 0.969] | 0.984<br>[0.951, 1.018]    | 0.968***<br>[0.954, 0.983] | 0.940**<br>[0.893, 0.989] | 0.952**<br>[0.917, 0.990]  | 0.854***<br>[0.785, 0.929] | 0.287<br>[0.283, 0.292] |
| Toilet: sh. Pit w/o slab/open pit     | 1.100<br>[0.932, 1.299]    | 1.114<br>[0.960, 1.292]    | 1.093<br>[0.862, 1.387]    | 1.029<br>[0.917, 1.155]    | 1.585**<br>[1.101, 2.284] | 1.080<br>[0.834, 1.399]    | 0.934<br>[0.519, 1.679]    | 0.003<br>[0.003, 0.003] |
| Toilet: shared composting toilet      | 1.083<br>[0.764, 1.536]    | 1.046<br>[0.787, 1.392]    | 0.362**<br>[0.143, 0.919]  | 0.760**<br>[0.590, 0.979]  | 0.243<br>[0.019, 3.058]   | 0.596<br>[0.258, 1.376]    | 1.349<br>[0.523, 3.478]    | 0.000<br>[0.000, 0.001] |
| Toilet: shared dry toilet             | 1.004                      | 0.929                      | 0.771                      | 1.047                      | 0.702                     | 0.527***                   | 0.749                      | 0.001                   |

|                                   |                |                |                |                |                |                |                |                |
|-----------------------------------|----------------|----------------|----------------|----------------|----------------|----------------|----------------|----------------|
|                                   | [0.854, 1.180] | [0.764, 1.131] | [0.556, 1.068] | [0.904, 1.213] | [0.343, 1.436] | [0.368, 0.753] | [0.304, 1.842] | [0.001, 0.001] |
| Toilet: shared other              | 0.728***       | 1.086          | 1.466***       | 1.205***       | 0.601          | 1.108          | 1.218          | 0.002          |
|                                   | [0.609, 0.870] | [0.964, 1.224] | [1.288, 1.669] | [1.124, 1.292] | [0.310, 1.165] | [0.911, 1.349] | [0.717, 2.070] | [0.001, 0.002] |
| Toilet: flush to pit latrine      | 0.960**        | 0.972          | 0.941**        | 0.981          | 0.984          | 0.953*         | 0.840**        | 0.072          |
|                                   | [0.928, 0.994] | [0.939, 1.007] | [0.894, 0.990] | [0.957, 1.005] | [0.909, 1.066] | [0.902, 1.007] | [0.735, 0.961] | [0.070, 0.074] |
| Toilet: flush to somewhere else   | 0.922*         | 0.926*         | 0.934          | 0.968          | 0.795**        | 0.892*         | 0.981          | 0.009          |
|                                   | [0.849, 1.002] | [0.848, 1.012] | [0.835, 1.044] | [0.915, 1.023] | [0.637, 0.993] | [0.793, 1.004] | [0.744, 1.295] | [0.008, 0.010] |
| Toilet: flush don't know where    | 1.101          | 0.786*         | 0.926          | 1.131*         | 1.483**        | 1.074          | 0.926          | 0.001          |
|                                   | [0.846, 1.432] | [0.598, 1.032] | [0.689, 1.243] | [0.982, 1.301] | [1.027, 2.140] | [0.804, 1.433] | [0.486, 1.765] | [0.001, 0.001] |
| Toilet: ventilated improved pit   | 0.939          | 0.829***       | 0.761***       | 0.957          | 1.103          | 0.978          | 1.171          | 0.006          |
|                                   | [0.834, 1.057] | [0.725, 0.947] | [0.640, 0.905] | [0.886, 1.034] | [0.899, 1.355] | [0.833, 1.147] | [0.902, 1.522] | [0.005, 0.006] |
| Toilet: pit latrine with slab     | 0.966          | 0.934***       | 0.896***       | 0.950***       | 1.026          | 0.968          | 1.005          | 0.039          |
|                                   | [0.924, 1.011] | [0.893, 0.978] | [0.834, 0.962] | [0.921, 0.981] | [0.903, 1.166] | [0.907, 1.034] | [0.857, 1.178] | [0.038, 0.041] |
| Toilet: pit without slab/open pit | 1.008          | 0.997          | 1.022          | 0.944          | 1.113          | 1.021          | 0.844          | 0.011          |
|                                   | [0.917, 1.108] | [0.909, 1.093] | [0.884, 1.181] | [0.856, 1.041] | [0.870, 1.424] | [0.894, 1.166] | [0.626, 1.139] | [0.011, 0.012] |
| Water: tube well or borehole      | RC             | 0.392          |
|                                   |                |                |                |                |                |                |                | [0.386, 0.399] |
| Water: piped into dwelling        | 0.989          | 1.009          | 1.023          | 1.005          | 0.959          | 1.025          | 0.862***       | 0.166          |
|                                   | [0.960, 1.019] | [0.977, 1.042] | [0.979, 1.069] | [0.987, 1.023] | [0.895, 1.027] | [0.978, 1.074] | [0.774, 0.960] | [0.161, 0.171] |
| Water: rainwater                  | 0.975          | 0.726***       | 0.723*         | 0.804*         | 1.090          | 0.876          | 0.861          | 0.002          |
|                                   | [0.818, 1.162] | [0.577, 0.913] | [0.517, 1.012] | [0.634, 1.019] | [0.739, 1.607] | [0.611, 1.257] | [0.290, 2.561] | [0.001, 0.002] |
| Water: tanker truck               | 0.998          | 0.953          | 0.915*         | 0.972          | 0.942          | 1.029          | 1.032          | 0.013          |
|                                   | [0.934, 1.067] | [0.890, 1.020] | [0.830, 1.009] | [0.939, 1.006] | [0.797, 1.113] | [0.927, 1.141] | [0.811, 1.313] | [0.011, 0.016] |
| Water: cart with small tank       | 0.821          | 0.836          | 1.035          | 0.942          | 1.094          | 0.913          | 1.618*         | 0.002          |
|                                   | [0.642, 1.050] | [0.634, 1.103] | [0.793, 1.352] | [0.850, 1.044] | [0.719, 1.666] | [0.675, 1.233] | [0.940, 2.784] | [0.001, 0.002] |
| Water: bottled water              | 0.945**        | 0.966*         | 0.965          | 1.014          | 1.112**        | 0.927**        | 0.804**        | 0.031          |
|                                   | [0.903, 0.989] | [0.927, 1.007] | [0.903, 1.031] | [0.984, 1.046] | [1.010, 1.225] | [0.869, 0.989] | [0.679, 0.951] | [0.029, 0.033] |
| Water: community RO plant         | 0.902**        | 0.884**        | 1.060          | 0.998          | 1.160          | 0.949          | 1.149          | 0.005          |
|                                   | [0.819, 0.993] | [0.792, 0.987] | [0.920, 1.223] | [0.942, 1.057] | [0.959, 1.404] | [0.794, 1.136] | [0.855, 1.545] | [0.005, 0.006] |
| Water: other                      | 0.929          | 1.026          | 0.874          | 1.024          | 1.421*         | 0.862          | 1.251          | 0.002          |
|                                   | [0.781, 1.106] | [0.853, 1.235] | [0.645, 1.184] | [0.905, 1.159] | [0.978, 2.064] | [0.609, 1.220] | [0.680, 2.301] | [0.001, 0.002] |
| Water: piped to yard/plot         | 1.006          | 0.996          | 1.007          | 0.976***       | 1.018          | 0.996          | 0.979          | 0.136          |
|                                   | [0.980, 1.032] | [0.970, 1.022] | [0.968, 1.047] | [0.958, 0.994] | [0.949, 1.091] | [0.952, 1.042] | [0.887, 1.080] | [0.132, 0.139] |
| Water: public tap/standpipe       | 1.020*         | 1.013          | 0.994          | 1.013          | 1.043          | 1.008          | 1.049          | 0.159          |
|                                   | [0.997, 1.043] | [0.990, 1.036] | [0.958, 1.032] | [0.996, 1.030] | [0.977, 1.113] | [0.967, 1.051] | [0.966, 1.139] | [0.155, 0.163] |
| Water: protected well             | 1.016          | 0.978          | 0.958          | 1.038**        | 1.032          | 1.038          | 0.873          | 0.037          |

|                                        |                |                |                |                |                |                |                 |                |
|----------------------------------------|----------------|----------------|----------------|----------------|----------------|----------------|-----------------|----------------|
| Water: unprotected well                | [0.963, 1.071] | [0.930, 1.028] | [0.894, 1.027] | [1.001, 1.077] | [0.881, 1.207] | [0.958, 1.123] | [0.704, 1.083]  | [0.034, 0.039] |
|                                        | 0.995          | 0.985          | 1.005          | 1.002          | 1.032          | 0.999          | 0.984           | 0.042          |
| Water: protected spring                | [0.964, 1.027] | [0.954, 1.017] | [0.959, 1.054] | [0.977, 1.027] | [0.942, 1.131] | [0.936, 1.066] | [0.877, 1.105]  | [0.041, 0.044] |
|                                        | 0.927          | 0.965          | 1.053          | 1.003          | 1.060          | 1.082          | 0.739           | 0.003          |
| Water: unprotected spring              | [0.723, 1.187] | [0.731, 1.272] | [0.745, 1.487] | [0.853, 1.181] | [0.590, 1.902] | [0.825, 1.420] | [0.258, 2.116]  | [0.003, 0.004] |
|                                        | 0.940          | 0.914          | 0.918          | 0.990          | 0.951          | 1.111          | 0.774           | 0.004          |
| Water: river/dam/lake/ponds etc.       | [0.804, 1.098] | [0.788, 1.060] | [0.712, 1.185] | [0.871, 1.124] | [0.572, 1.581] | [0.886, 1.393] | [0.405, 1.477]  | [0.004, 0.004] |
|                                        | 0.964          | 0.932          | 1.020          | 0.968          | 1.067          | 0.848*         | 0.913           | 0.007          |
|                                        | [0.834, 1.114] | [0.831, 1.044] | [0.873, 1.190] | [0.865, 1.084] | [0.744, 1.532] | [0.711, 1.012] | [0.645, 1.292]  | [0.006, 0.007] |
| <b>b) Food storage and preparation</b> |                |                |                |                |                |                |                 |                |
| Refrigerator                           | 0.943***       | 0.941***       | 0.943***       | 0.992          | 1.028          | 0.987          | 0.947           | 0.296          |
|                                        | [0.919, 0.967] | [0.917, 0.965] | [0.911, 0.977] | [0.977, 1.007] | [0.971, 1.088] | [0.950, 1.026] | [0.863, 1.039]  | [0.291, 0.302] |
| Pressure cooker                        | 0.972***       | 0.970***       | 0.982          | 0.987**        | 1.024          | 0.970*         | 0.980           | 0.566          |
|                                        | [0.956, 0.989] | [0.953, 0.987] | [0.953, 1.013] | [0.974, 1.000] | [0.980, 1.069] | [0.940, 1.002] | [0.920, 1.044]  | [0.561, 0.572] |
| Cooking: wood                          | RC              | 0.405          |
|                                        |                |                |                |                |                |                |                 | [0.399, 0.411] |
| Cooking: electricity                   | 1.064          | 0.944          | 0.864          | 0.976          | 0.956          | 0.914          | 1.280           | 0.006          |
|                                        | [0.959, 1.180] | [0.841, 1.059] | [0.700, 1.066] | [0.904, 1.053] | [0.728, 1.255] | [0.754, 1.108] | [0.904, 1.812]  | [0.006, 0.007] |
| Cooking: animal dung                   | 0.994          | 0.999          | 0.958**        | 1.009          | 1.097***       | 0.985          | 0.980           | 0.072          |
|                                        | [0.974, 1.014] | [0.974, 1.024] | [0.919, 0.998] | [0.994, 1.025] | [1.035, 1.163] | [0.938, 1.035] | [0.912, 1.053]  | [0.069, 0.074] |
| Cooking: no food cooked in house       | 1.759***       | 1.647***       | 1.293          | 1.041          | 1.456          | 0.000***       | 1.509           | 0.003          |
|                                        | [1.348, 2.296] | [1.307, 2.075] | [0.873, 1.916] | [0.890, 1.216] | [0.612, 3.463] | [0.000, 0.000] | [0.270, 8.431]  | [0.002, 0.003] |
| Cooking: other                         | 1.093          | 1.065          | 1.032          | 0.946          | 0.845          | 0.817          | 0.384           | 0.000          |
|                                        | [0.754, 1.585] | [0.751, 1.510] | [0.645, 1.651] | [0.689, 1.299] | [0.287, 2.490] | [0.334, 1.999] | [0.011, 13.071] | [0.000, 0.001] |
| Cooking: LPG/natural gas               | 0.960***       | 0.963***       | 0.983          | 1.005          | 1.049*         | 0.956**        | 0.971           | 0.423          |
|                                        | [0.938, 0.982] | [0.939, 0.988] | [0.950, 1.017] | [0.989, 1.020] | [0.993, 1.107] | [0.921, 0.993] | [0.894, 1.056]  | [0.416, 0.430] |
| Cooking: biogas                        | 0.954          | 0.943          | 0.881*         | 1.093***       | 0.843          | 0.929          | 1.336**         | 0.008          |
|                                        | [0.871, 1.046] | [0.856, 1.038] | [0.774, 1.002] | [1.040, 1.150] | [0.662, 1.074] | [0.831, 1.040] | [1.013, 1.761]  | [0.007, 0.009] |
| Cooking: kerosene                      | 1.005          | 1.034          | 0.951          | 0.985          | 0.936          | 1.136***       | 1.108           | 0.012          |
|                                        | [0.948, 1.064] | [0.986, 1.086] | [0.875, 1.034] | [0.945, 1.026] | [0.787, 1.114] | [1.042, 1.237] | [0.865, 1.419]  | [0.011, 0.013] |
| Cooking: coal, lignite                 | 1.007          | 1.051          | 1.125**        | 0.975          | 1.192*         | 0.904          | 1.087           | 0.009          |
|                                        | [0.939, 1.080] | [0.988, 1.118] | [1.009, 1.255] | [0.939, 1.012] | [0.974, 1.458] | [0.800, 1.022] | [0.827, 1.428]  | [0.008, 0.010] |
| Cooking: charcoal                      | 0.975          | 1.109***       | 1.014          | 1.057**        | 1.007          | 0.890          | 1.141           | 0.006          |
|                                        | [0.905, 1.051] | [1.036, 1.187] | [0.909, 1.130] | [1.004, 1.113] | [0.789, 1.287] | [0.747, 1.061] | [0.863, 1.508]  | [0.005, 0.006] |
| Cooking: straw/shrubs/grass            | 1.058***       | 1.030**        | 0.986          | 1.019*         | 1.051          | 1.044          | 1.067           | 0.025          |
|                                        | [1.035, 1.082] | [1.001, 1.060] | [0.941, 1.033] | [0.999, 1.040] | [0.972, 1.136] | [0.974, 1.118] | [0.961, 1.184]  | [0.024, 0.027] |

|                                |                            |                            |                            |                            |                            |                            |                            |                         |
|--------------------------------|----------------------------|----------------------------|----------------------------|----------------------------|----------------------------|----------------------------|----------------------------|-------------------------|
| Cooking: agricultural crop     | 1.016<br>[0.991, 1.042]    | 1.037***<br>[1.011, 1.064] | 1.020<br>[0.976, 1.067]    | 1.013<br>[0.991, 1.036]    | 1.079*<br>[0.988, 1.177]   | 0.985<br>[0.918, 1.056]    | 0.949<br>[0.853, 1.055]    | 0.030<br>[0.028, 0.032] |
| <b>c) Other consumer goods</b> |                            |                            |                            |                            |                            |                            |                            |                         |
| Radio                          | 0.968**<br>[0.943, 0.994]  | 0.995<br>[0.967, 1.023]    | 1.001<br>[0.965, 1.040]    | 1.015*<br>[0.998, 1.031]   | 0.996<br>[0.939, 1.056]    | 1.053**<br>[1.008, 1.101]  | 0.977<br>[0.892, 1.070]    | 0.081<br>[0.080, 0.083] |
| Bicycle                        | 0.985**<br>[0.972, 0.998]  | 0.992<br>[0.978, 1.005]    | 1.027**<br>[1.006, 1.049]  | 0.986***<br>[0.977, 0.994] | 0.954***<br>[0.922, 0.988] | 1.021*<br>[0.996, 1.047]   | 0.968<br>[0.922, 1.017]    | 0.521<br>[0.516, 0.526] |
| Motorcycle/scooter             | 0.952***<br>[0.937, 0.967] | 0.958***<br>[0.941, 0.974] | 0.970**<br>[0.946, 0.994]  | 0.984***<br>[0.973, 0.995] | 0.933***<br>[0.897, 0.970] | 0.954***<br>[0.928, 0.980] | 0.899***<br>[0.846, 0.956] | 0.377<br>[0.372, 0.381] |
| Car/truck                      | 0.948**<br>[0.903, 0.995]  | 0.936**<br>[0.884, 0.990]  | 0.962<br>[0.909, 1.019]    | 0.994<br>[0.968, 1.021]    | 0.891***<br>[0.816, 0.972] | 1.007<br>[0.952, 1.065]    | 1.005<br>[0.866, 1.166]    | 0.060<br>[0.058, 0.063] |
| Telephone (land-line)          | 0.947*<br>[0.889, 1.010]   | 1.017<br>[0.955, 1.083]    | 1.129***<br>[1.057, 1.207] | 0.988<br>[0.957, 1.020]    | 0.927<br>[0.832, 1.033]    | 0.979<br>[0.909, 1.054]    | 0.972<br>[0.780, 1.213]    | 0.039<br>[0.037, 0.041] |
| Mobile telephone               | 0.974**<br>[0.953, 0.995]  | 0.951***<br>[0.929, 0.973] | 0.942***<br>[0.909, 0.975] | 0.972***<br>[0.955, 0.989] | 0.992<br>[0.927, 1.062]    | 0.907***<br>[0.866, 0.951] | 1.003<br>[0.924, 1.088]    | 0.904<br>[0.902, 0.906] |
| Watch                          | 1.001<br>[0.986, 1.016]    | 1.008<br>[0.992, 1.024]    | 1.017<br>[0.991, 1.043]    | 0.976***<br>[0.966, 0.986] | 0.976<br>[0.937, 1.017]    | 0.994<br>[0.965, 1.024]    | 0.943**<br>[0.892, 0.997]  | 0.781<br>[0.778, 0.785] |
| Mattress                       | 0.984**<br>[0.969, 0.998]  | 0.996<br>[0.980, 1.012]    | 0.985<br>[0.961, 1.009]    | 0.992<br>[0.981, 1.003]    | 0.994<br>[0.953, 1.035]    | 0.994<br>[0.966, 1.024]    | 0.992<br>[0.937, 1.050]    | 0.667<br>[0.662, 0.672] |
| Chair                          | 0.992<br>[0.976, 1.008]    | 0.990<br>[0.973, 1.006]    | 1.010<br>[0.984, 1.037]    | 0.997<br>[0.987, 1.007]    | 0.979<br>[0.940, 1.020]    | 0.993<br>[0.962, 1.025]    | 0.918***<br>[0.865, 0.974] | 0.762<br>[0.758, 0.765] |
| Cot/bed                        | 0.996<br>[0.977, 1.015]    | 0.981*<br>[0.961, 1.001]   | 0.977<br>[0.946, 1.008]    | 1.008<br>[0.993, 1.023]    | 0.988<br>[0.929, 1.050]    | 0.997<br>[0.961, 1.035]    | 0.844***<br>[0.785, 0.908] | 0.884<br>[0.881, 0.887] |
| Table                          | 1.007<br>[0.991, 1.023]    | 1.015*<br>[0.998, 1.032]   | 0.970**<br>[0.947, 0.995]  | 0.995<br>[0.984, 1.005]    | 0.890***<br>[0.857, 0.925] | 0.959***<br>[0.931, 0.988] | 0.969<br>[0.913, 1.027]    | 0.554<br>[0.550, 0.559] |
| Electric fan                   | 0.979*<br>[0.959, 1.000]   | 0.998<br>[0.976, 1.020]    | 0.985<br>[0.950, 1.021]    | 1.007<br>[0.990, 1.025]    | 1.021<br>[0.964, 1.081]    | 1.002<br>[0.960, 1.046]    | 0.933*<br>[0.861, 1.010]   | 0.782<br>[0.777, 0.786] |
| Black and white television     | 0.964**<br>[0.933, 0.997]  | 0.960**<br>[0.926, 0.996]  | 0.971<br>[0.924, 1.021]    | 0.989<br>[0.968, 1.010]    | 1.055<br>[0.968, 1.149]    | 1.056<br>[0.989, 1.127]    | 1.112**<br>[1.005, 1.230]  | 0.033<br>[0.032, 0.034] |
| Color television               | 0.969***<br>[0.951, 0.987] | 0.970***<br>[0.951, 0.989] | 0.988<br>[0.961, 1.016]    | 0.988**<br>[0.976, 1.000]  | 0.958*<br>[0.916, 1.003]   | 0.983<br>[0.954, 1.014]    | 0.937**<br>[0.883, 0.995]  | 0.635<br>[0.630, 0.640] |
| Sewing machine                 | 0.983*<br>[0.964, 1.003]   | 1.006<br>[0.987, 1.026]    | 1.010<br>[0.983, 1.038]    | 0.997<br>[0.986, 1.008]    | 1.053**<br>[1.011, 1.097]  | 0.967**<br>[0.937, 0.997]  | 0.913***<br>[0.856, 0.973] | 0.240<br>[0.237, 0.243] |
| Computer                       | 1.034<br>[0.990, 1.080]    | 0.980<br>[0.935, 1.027]    | 1.006<br>[0.957, 1.059]    | 0.958***<br>[0.933, 0.984] | 0.983<br>[0.901, 1.074]    | 0.954*<br>[0.902, 1.008]   | 0.925<br>[0.796, 1.075]    | 0.090<br>[0.087, 0.093] |
| Air conditioner/cooler         | 1.022                      | 1.030**                    | 0.997                      | 0.999                      | 1.075**                    | 0.968                      | 0.948                      | 0.179                   |

|                                     |                |                |                |                |                |                |                |                |
|-------------------------------------|----------------|----------------|----------------|----------------|----------------|----------------|----------------|----------------|
|                                     | [0.995, 1.051] | [1.001, 1.059] | [0.962, 1.034] | [0.983, 1.016] | [1.014, 1.141] | [0.932, 1.006] | [0.866, 1.038] | [0.175, 0.183] |
| Washing machine                     | 0.952**        | 0.957*         | 0.949**        | 1.001          | 1.017          | 0.964          | 0.838***       | 0.136          |
|                                     | [0.916, 0.990] | [0.914, 1.001] | [0.902, 0.998] | [0.979, 1.023] | [0.948, 1.092] | [0.920, 1.010] | [0.735, 0.955] | [0.132, 0.140] |
| <b>d) Housing quality</b>           |                |                |                |                |                |                |                |                |
| Residents per bedroom               | 1.008***       | 1.006***       | 0.993**        | 1.000          | 0.998          | 1.002          | 0.736***       | 2.917          |
|                                     | [1.004, 1.012] | [1.002, 1.010] | [0.987, 0.999] | [0.998, 1.003] | [0.989, 1.008] | [0.995, 1.010] | [0.722, 0.750] | [2.905, 2.929] |
| Floor: cement                       | RC             | 0.393          |
|                                     |                |                |                |                |                |                |                | [0.388, 0.397] |
| Floor: mud/clay/earth               | 1.032***       | 1.016          | 1.006          | 1.004          | 0.987          | 1.007          | 1.077*         | 0.271          |
|                                     | [1.010, 1.055] | [0.994, 1.038] | [0.972, 1.042] | [0.989, 1.019] | [0.934, 1.043] | [0.965, 1.050] | [0.996, 1.164] | [0.266, 0.276] |
| Floor: ceramic tiles                | 1.033**        | 0.962**        | 0.974          | 0.992          | 0.959          | 0.987          | 1.139**        | 0.106          |
|                                     | [1.002, 1.065] | [0.930, 0.995] | [0.932, 1.017] | [0.974, 1.010] | [0.894, 1.029] | [0.947, 1.029] | [1.029, 1.260] | [0.102, 0.110] |
| Floor: carpet                       | 1.014          | 1.096          | 1.118          | 1.094**        | 1.090          | 1.040          | 1.000          | 0.006          |
|                                     | [0.907, 1.133] | [0.980, 1.225] | [0.975, 1.283] | [1.006, 1.190] | [0.848, 1.401] | [0.893, 1.213] | [0.603, 1.658] | [0.005, 0.006] |
| Floor: polished stone/marble/grani. | 0.993          | 0.934***       | 0.956*         | 0.981*         | 0.911**        | 0.892***       | 0.932          | 0.077          |
|                                     | [0.957, 1.031] | [0.900, 0.970] | [0.910, 1.004] | [0.961, 1.002] | [0.847, 0.980] | [0.848, 0.937] | [0.816, 1.064] | [0.074, 0.080] |
| Floor: other                        | 0.725          | 0.796          | 0.999          | 0.840          | 0.991          | 0.811          | 1.445          | 0.001          |
|                                     | [0.474, 1.111] | [0.507, 1.250] | [0.691, 1.444] | [0.665, 1.062] | [0.471, 2.087] | [0.497, 1.325] | [0.687, 3.037] | [0.001, 0.001] |
| Floor: sand                         | 1.013          | 1.050          | 1.087          | 0.979          | 1.297***       | 1.012          | 1.181          | 0.007          |
|                                     | [0.948, 1.083] | [0.974, 1.132] | [0.979, 1.207] | [0.934, 1.025] | [1.092, 1.541] | [0.888, 1.155] | [0.959, 1.453] | [0.007, 0.007] |
| Floor: dung                         | 1.007          | 0.995          | 0.979          | 0.990          | 1.008          | 1.039          | 1.022          | 0.070          |
|                                     | [0.980, 1.034] | [0.967, 1.024] | [0.933, 1.027] | [0.970, 1.009] | [0.932, 1.089] | [0.979, 1.102] | [0.929, 1.124] | [0.068, 0.072] |
| Floor: raw wood planks              | 0.976          | 0.985          | 1.001          | 0.861          | 0.930          | 1.059          | 1.361          | 0.002          |
|                                     | [0.687, 1.388] | [0.695, 1.395] | [0.620, 1.616] | [0.673, 1.101] | [0.447, 1.937] | [0.548, 2.045] | [0.434, 4.269] | [0.002, 0.003] |
| Floor: palm/bamboo                  | 0.953          | 0.980          | 1.039          | 0.944          | 1.268          | 1.000          | 1.404          | 0.002          |
|                                     | [0.640, 1.418] | [0.667, 1.440] | [0.660, 1.636] | [0.659, 1.353] | [0.582, 2.760] | [0.660, 1.516] | [0.566, 3.482] | [0.002, 0.002] |
| Floor: brick                        | 0.965          | 0.983          | 1.011          | 0.972          | 1.117          | 1.003          | 1.101          | 0.008          |
|                                     | [0.898, 1.036] | [0.912, 1.060] | [0.915, 1.117] | [0.932, 1.013] | [0.961, 1.297] | [0.900, 1.119] | [0.881, 1.376] | [0.007, 0.008] |
| Floor: stone                        | 1.050***       | 0.997          | 0.920***       | 0.985          | 0.923*         | 0.947**        | 1.142**        | 0.055          |
|                                     | [1.015, 1.087] | [0.965, 1.030] | [0.878, 0.964] | [0.965, 1.006] | [0.849, 1.004] | [0.898, 0.999] | [1.012, 1.287] | [0.052, 0.057] |
| Floor: parquet/polished wood        | 1.013          | 1.001          | 1.199          | 0.943          | 1.214          | 0.982          | 0.734          | 0.002          |
|                                     | [0.746, 1.374] | [0.778, 1.287] | [0.863, 1.666] | [0.773, 1.150] | [0.738, 1.996] | [0.728, 1.325] | [0.177, 3.044] | [0.002, 0.002] |
| Floor: vinyl/asphalt strips         | 1.233          | 1.322*         | 1.279          | 0.923          | 1.712          | 1.028          | 0.690          | 0.002          |
|                                     | [0.848, 1.793] | [0.972, 1.798] | [0.846, 1.932] | [0.731, 1.165] | [0.609, 4.812] | [0.633, 1.669] | [0.057, 8.305] | [0.001, 0.002] |
| Roof: RCC/RBC/cement/concrete       | RC             | 0.413          |
|                                     |                |                |                |                |                |                |                | [0.408, 0.419] |

|                                  |                            |                            |                         |                            |                           |                            |                            |                         |
|----------------------------------|----------------------------|----------------------------|-------------------------|----------------------------|---------------------------|----------------------------|----------------------------|-------------------------|
| Roof: no roof                    | 1.043<br>[0.946, 1.149]    | 1.111**<br>[1.001, 1.234]  | 1.012<br>[0.834, 1.229] | 0.997<br>[0.902, 1.101]    | 0.991<br>[0.763, 1.286]   | 1.166<br>[0.947, 1.436]    | 0.952<br>[0.580, 1.563]    | 0.002<br>[0.002, 0.002] |
| Roof: loosely packed stone       | 1.016<br>[0.983, 1.051]    | 1.004<br>[0.965, 1.046]    | 1.005<br>[0.936, 1.080] | 1.015<br>[0.985, 1.045]    | 1.062<br>[0.953, 1.184]   | 1.023<br>[0.955, 1.097]    | 1.146*<br>[0.994, 1.322]   | 0.023<br>[0.022, 0.025] |
| Roof: metal/GI                   | 0.986<br>[0.957, 1.017]    | 1.005<br>[0.976, 1.034]    | 0.999<br>[0.958, 1.042] | 1.008<br>[0.988, 1.028]    | 1.069<br>[0.987, 1.158]   | 0.991<br>[0.943, 1.042]    | 1.169***<br>[1.048, 1.303] | 0.110<br>[0.106, 0.113] |
| Roof: wood                       | 0.990<br>[0.933, 1.050]    | 1.059**<br>[1.002, 1.118]  | 1.000<br>[0.910, 1.099] | 0.991<br>[0.956, 1.028]    | 1.139*<br>[0.994, 1.305]  | 1.071<br>[0.977, 1.173]    | 1.266**<br>[1.047, 1.531]  | 0.012<br>[0.011, 0.012] |
| Roof: calamine/cement fiber      | 1.082***<br>[1.044, 1.122] | 1.071***<br>[1.030, 1.114] | 1.012<br>[0.956, 1.072] | 1.045***<br>[1.019, 1.072] | 1.071<br>[0.986, 1.163]   | 1.063**<br>[1.002, 1.129]  | 1.074<br>[0.941, 1.226]    | 0.028<br>[0.027, 0.030] |
| Roof: asbestos sheets            | 0.993<br>[0.969, 1.018]    | 1.018<br>[0.994, 1.043]    | 0.999<br>[0.965, 1.034] | 1.019**<br>[1.004, 1.034]  | 1.005<br>[0.944, 1.070]   | 1.042*<br>[0.999, 1.086]   | 1.155***<br>[1.064, 1.254] | 0.076<br>[0.073, 0.078] |
| Roof: roofing shingles           | 1.010<br>[0.968, 1.053]    | 1.011<br>[0.961, 1.063]    | 1.009<br>[0.936, 1.087] | 0.957**<br>[0.921, 0.995]  | 1.077<br>[0.931, 1.245]   | 0.986<br>[0.896, 1.085]    | 1.322***<br>[1.111, 1.573] | 0.020<br>[0.019, 0.021] |
| Roof: tiles                      | 1.058***<br>[1.032, 1.085] | 1.035**<br>[1.007, 1.064]  | 0.981<br>[0.942, 1.020] | 0.997<br>[0.978, 1.016]    | 1.094**<br>[1.016, 1.178] | 1.072***<br>[1.021, 1.125] | 1.142***<br>[1.033, 1.263] | 0.071<br>[0.068, 0.073] |
| Roof: slate                      | 1.015<br>[0.989, 1.042]    | 1.001<br>[0.975, 1.029]    | 0.977<br>[0.937, 1.020] | 1.000<br>[0.983, 1.017]    | 0.976<br>[0.911, 1.046]   | 0.980<br>[0.936, 1.026]    | 1.187***<br>[1.078, 1.306] | 0.081<br>[0.079, 0.084] |
| Roof: burnt brick                | 1.030**<br>[1.001, 1.060]  | 1.011<br>[0.978, 1.044]    | 0.973<br>[0.920, 1.029] | 0.999<br>[0.975, 1.023]    | 0.977<br>[0.906, 1.053]   | 1.044<br>[0.978, 1.115]    | 1.070<br>[0.971, 1.180]    | 0.045<br>[0.043, 0.047] |
| Roof: thatch/palm leaf           | 0.990<br>[0.959, 1.021]    | 0.991<br>[0.960, 1.024]    | 0.978<br>[0.930, 1.028] | 1.027**<br>[1.006, 1.048]  | 0.990<br>[0.919, 1.066]   | 1.005<br>[0.946, 1.069]    | 1.087*<br>[0.985, 1.201]   | 0.045<br>[0.043, 0.046] |
| Roof: other                      | 1.001<br>[0.958, 1.047]    | 1.034<br>[0.981, 1.091]    | 1.012<br>[0.942, 1.088] | 1.016<br>[0.984, 1.050]    | 1.071<br>[0.959, 1.196]   | 0.965<br>[0.878, 1.060]    | 1.336***<br>[1.135, 1.573] | 0.029<br>[0.027, 0.031] |
| Roof: mud                        | 1.023<br>[0.970, 1.078]    | 0.975<br>[0.915, 1.038]    | 0.972<br>[0.878, 1.076] | 0.999<br>[0.955, 1.044]    | 1.047<br>[0.904, 1.213]   | 1.016<br>[0.885, 1.166]    | 1.161<br>[0.928, 1.452]    | 0.009<br>[0.008, 0.009] |
| Roof: sod/mud and grass mixture  | 1.061**<br>[1.014, 1.110]  | 1.014<br>[0.959, 1.072]    | 0.995<br>[0.916, 1.081] | 1.038*<br>[1.000, 1.078]   | 1.053<br>[0.868, 1.277]   | 1.103*<br>[0.989, 1.230]   | 1.005<br>[0.836, 1.207]    | 0.009<br>[0.009, 0.010] |
| Roof: plastic/polythene sheeting | 1.045<br>[0.990, 1.102]    | 1.031<br>[0.971, 1.094]    | 1.076<br>[0.973, 1.189] | 1.037*<br>[0.997, 1.078]   | 1.094<br>[0.935, 1.279]   | 1.050<br>[0.926, 1.190]    | 1.201<br>[0.956, 1.509]    | 0.008<br>[0.007, 0.008] |
| Roof: rustic mat                 | 0.919<br>[0.795, 1.062]    | 0.920<br>[0.775, 1.093]    | 1.125<br>[0.891, 1.420] | 0.918<br>[0.819, 1.028]    | 1.172<br>[0.892, 1.540]   | 1.077<br>[0.778, 1.489]    | 0.815<br>[0.430, 1.543]    | 0.001<br>[0.001, 0.001] |
| Roof: palm/bamboo                | 1.004<br>[0.955, 1.055]    | 0.991<br>[0.937, 1.048]    | 0.988<br>[0.900, 1.086] | 1.014<br>[0.976, 1.052]    | 1.116*<br>[0.980, 1.270]  | 0.991<br>[0.880, 1.116]    | 1.312***<br>[1.099, 1.567] | 0.007<br>[0.007, 0.008] |
| Roof: raw wood planks/timber     | 1.005<br>[0.933, 1.082]    | 0.996<br>[0.914, 1.084]    | 1.062<br>[0.940, 1.200] | 1.034<br>[0.983, 1.088]    | 1.110<br>[0.928, 1.327]   | 0.951<br>[0.819, 1.105]    | 0.987<br>[0.724, 1.345]    | 0.006<br>[0.006, 0.007] |

|                                |                           |                           |                            |                            |                           |                            |                           |                         |
|--------------------------------|---------------------------|---------------------------|----------------------------|----------------------------|---------------------------|----------------------------|---------------------------|-------------------------|
| Roof: unburnt bricks           | 1.034<br>[0.971, 1.100]   | 1.061<br>[0.986, 1.142]   | 1.108<br>[0.977, 1.256]    | 1.027<br>[0.972, 1.084]    | 1.040<br>[0.869, 1.244]   | 1.162**<br>[1.024, 1.318]  | 1.189<br>[0.933, 1.515]   | 0.005<br>[0.005, 0.005] |
| Wall: cement/concrete          | RC                        | RC                        | RC                         | RC                         | RC                        | RC                         | RC                        | 0.379<br>[0.373, 0.385] |
| Wall: no walls                 | 1.114**<br>[1.015, 1.222] | 1.128**<br>[1.004, 1.266] | 1.006<br>[0.823, 1.230]    | 0.984<br>[0.904, 1.070]    | 0.920<br>[0.723, 1.170]   | 0.813*<br>[0.656, 1.008]   | 0.885<br>[0.519, 1.511]   | 0.003<br>[0.003, 0.004] |
| Wall: raw/reused wood          | 1.043<br>[0.878, 1.238]   | 0.939<br>[0.744, 1.184]   | 0.903<br>[0.632, 1.292]    | 1.020<br>[0.883, 1.178]    | 1.087<br>[0.579, 2.044]   | 1.093<br>[0.791, 1.509]    | 1.067<br>[0.435, 2.620]   | 0.003<br>[0.002, 0.003] |
| Wall: stone with lime/cement   | 1.010<br>[0.972, 1.050]   | 1.017<br>[0.979, 1.057]   | 1.070***<br>[1.018, 1.125] | 1.002<br>[0.979, 1.026]    | 0.977<br>[0.878, 1.087]   | 1.087***<br>[1.026, 1.152] | 1.054<br>[0.930, 1.193]   | 0.059<br>[0.057, 0.061] |
| Wall: burnt bricks             | 1.013<br>[0.990, 1.035]   | 1.016<br>[0.994, 1.038]   | 1.015<br>[0.982, 1.049]    | 1.025***<br>[1.010, 1.040] | 1.004<br>[0.955, 1.055]   | 1.039**<br>[1.003, 1.076]  | 1.069*<br>[0.992, 1.152]  | 0.252<br>[0.247, 0.257] |
| Wall: cement blocks            | 0.999<br>[0.967, 1.033]   | 1.025<br>[0.991, 1.060]   | 1.045*<br>[1.000, 1.093]   | 1.021*<br>[0.998, 1.045]   | 1.022<br>[0.940, 1.111]   | 1.083***<br>[1.034, 1.135] | 1.063<br>[0.944, 1.196]   | 0.058<br>[0.055, 0.060] |
| Wall: wood planks/shingles     | 0.933<br>[0.738, 1.181]   | 0.853<br>[0.701, 1.039]   | 0.749*<br>[0.531, 1.056]   | 1.001<br>[0.876, 1.145]    | 1.148<br>[0.753, 1.748]   | 1.040<br>[0.744, 1.455]    | 1.198<br>[0.629, 2.280]   | 0.002<br>[0.002, 0.002] |
| Wall: GI/metal/asbestos sheets | 1.081<br>[0.969, 1.206]   | 0.909**<br>[0.833, 0.993] | 0.975<br>[0.871, 1.091]    | 1.072<br>[0.975, 1.179]    | 1.170<br>[0.953, 1.435]   | 0.953<br>[0.841, 1.081]    | 1.583**<br>[1.077, 2.328] | 0.010<br>[0.009, 0.011] |
| Wall: other                    | 0.905<br>[0.735, 1.114]   | 1.009<br>[0.869, 1.171]   | 1.151<br>[0.959, 1.382]    | 1.026<br>[0.903, 1.166]    | 1.427**<br>[1.015, 2.006] | 0.983<br>[0.790, 1.223]    | 0.777<br>[0.413, 1.462]   | 0.002<br>[0.002, 0.002] |
| Wall: cane/palm/trunks         | 0.977<br>[0.923, 1.035]   | 1.020<br>[0.962, 1.082]   | 1.085*<br>[0.988, 1.192]   | 1.023<br>[0.974, 1.074]    | 1.001<br>[0.824, 1.217]   | 0.967<br>[0.865, 1.081]    | 1.132<br>[0.932, 1.374]   | 0.016<br>[0.015, 0.017] |
| Wall: mud                      | 0.983<br>[0.956, 1.011]   | 0.996<br>[0.969, 1.024]   | 1.046**<br>[1.003, 1.092]  | 1.056***<br>[1.035, 1.076] | 0.974<br>[0.912, 1.041]   | 1.031<br>[0.982, 1.083]    | 1.106**<br>[1.004, 1.219] | 0.136<br>[0.132, 0.139] |
| Wall: grass/reeds/thatch       | 1.049*<br>[0.997, 1.104]  | 1.054**<br>[1.005, 1.104] | 0.999<br>[0.909, 1.098]    | 0.988<br>[0.949, 1.028]    | 1.075<br>[0.939, 1.230]   | 1.047<br>[0.933, 1.176]    | 1.090<br>[0.914, 1.300]   | 0.009<br>[0.008, 0.009] |
| Wall: bamboo with mud          | 1.038<br>[0.993, 1.085]   | 1.061**<br>[1.014, 1.111] | 1.056<br>[0.982, 1.134]    | 1.031*<br>[0.998, 1.065]   | 1.086<br>[0.957, 1.232]   | 0.947<br>[0.858, 1.044]    | 1.165**<br>[1.004, 1.352] | 0.028<br>[0.027, 0.029] |
| Wall: stone with mud           | 1.020<br>[0.972, 1.071]   | 1.030<br>[0.980, 1.083]   | 1.086**<br>[1.008, 1.170]  | 0.985<br>[0.952, 1.019]    | 0.987<br>[0.870, 1.119]   | 1.027<br>[0.947, 1.113]    | 1.174*<br>[0.977, 1.410]  | 0.021<br>[0.020, 0.022] |
| Wall: plywood                  | 1.153<br>[0.895, 1.485]   | 0.899<br>[0.656, 1.231]   | 0.858<br>[0.531, 1.387]    | 1.128<br>[0.933, 1.365]    | 1.257<br>[0.684, 2.309]   | 0.929<br>[0.544, 1.586]    | 0.360<br>[0.029, 4.452]   | 0.001<br>[0.001, 0.001] |
| Wall: cardboard                | 1.078<br>[0.928, 1.251]   | 1.048<br>[0.848, 1.295]   | 1.068<br>[0.755, 1.511]    | 0.933<br>[0.773, 1.126]    | 0.841<br>[0.490, 1.445]   | 1.169<br>[0.774, 1.767]    | 0.791<br>[0.373, 1.679]   | 0.001<br>[0.001, 0.001] |
| Wall: unburnt brick            | 1.031<br>[0.990, 1.074]   | 1.017<br>[0.974, 1.062]   | 1.009<br>[0.947, 1.074]    | 1.022<br>[0.995, 1.049]    | 0.929<br>[0.829, 1.041]   | 1.051<br>[0.978, 1.129]    | 1.151**<br>[1.019, 1.298] | 0.021<br>[0.020, 0.022] |

**e) Other**

|                               |                            |                            |                            |                            |                            |                            |                            |                         |
|-------------------------------|----------------------------|----------------------------|----------------------------|----------------------------|----------------------------|----------------------------|----------------------------|-------------------------|
| Staff                         | 0.870<br>[0.563, 1.345]    | 0.844<br>[0.543, 1.310]    | 0.906<br>[0.501, 1.640]    | 1.031<br>[0.845, 1.256]    | 1.124<br>[0.625, 2.024]    | 0.911<br>[0.567, 1.465]    | 1.577<br>[0.786, 3.164]    | 0.002<br>[0.001, 0.002] |
| Bank account                  | 0.972***<br>[0.956, 0.989] | 0.996<br>[0.977, 1.014]    | 0.988<br>[0.960, 1.017]    | 0.975***<br>[0.964, 0.987] | 1.075***<br>[1.022, 1.131] | 0.927***<br>[0.897, 0.959] | 0.993<br>[0.927, 1.064]    | 0.895<br>[0.893, 0.897] |
| Electricity                   | 0.989<br>[0.970, 1.009]    | 0.977**<br>[0.957, 0.998]  | 0.954***<br>[0.920, 0.989] | 0.994<br>[0.978, 1.010]    | 0.961<br>[0.909, 1.016]    | 0.993<br>[0.948, 1.041]    | 0.946<br>[0.880, 1.018]    | 0.882<br>[0.879, 0.885] |
| Animal-drawn cart             | 0.985<br>[0.957, 1.014]    | 1.019<br>[0.987, 1.052]    | 1.010<br>[0.965, 1.056]    | 1.016<br>[0.996, 1.036]    | 0.978<br>[0.910, 1.050]    | 0.988<br>[0.935, 1.045]    | 0.986<br>[0.888, 1.095]    | 0.036<br>[0.035, 0.037] |
| Land usable for agriculture   | 0.985**<br>[0.972, 0.999]  | 0.954***<br>[0.940, 0.968] | 0.960***<br>[0.939, 0.982] | 0.984***<br>[0.973, 0.994] | 0.979<br>[0.946, 1.012]    | 0.985<br>[0.960, 1.011]    | 0.960<br>[0.911, 1.011]    | 0.389<br>[0.384, 0.394] |
| Internet                      | 1.006<br>[0.969, 1.044]    | 0.974<br>[0.938, 1.012]    | 0.945**<br>[0.898, 0.995]  | 0.991<br>[0.970, 1.013]    | 1.054<br>[0.976, 1.137]    | 0.991<br>[0.942, 1.044]    | 0.958<br>[0.846, 1.084]    | 0.109<br>[0.106, 0.112] |
| Thresher                      | 1.029<br>[0.974, 1.087]    | 1.035<br>[0.979, 1.095]    | 1.125***<br>[1.054, 1.202] | 0.987<br>[0.956, 1.020]    | 1.103*<br>[0.988, 1.232]   | 1.015<br>[0.932, 1.104]    | 0.982<br>[0.820, 1.177]    | 0.015<br>[0.014, 0.015] |
| Tractor                       | 0.980<br>[0.934, 1.028]    | 0.958*<br>[0.912, 1.007]   | 0.934**<br>[0.880, 0.992]  | 1.035***<br>[1.010, 1.060] | 1.022<br>[0.937, 1.114]    | 1.021<br>[0.954, 1.094]    | 0.959<br>[0.847, 1.087]    | 0.025<br>[0.024, 0.025] |
| Household member owns a house | 1.024***<br>[1.007, 1.042] | 1.016*<br>[0.999, 1.034]   | 0.994<br>[0.969, 1.021]    | 1.009<br>[0.998, 1.021]    | 1.010<br>[0.963, 1.059]    | 0.999<br>[0.969, 1.030]    | 1.027<br>[0.967, 1.090]    | 0.798<br>[0.794, 0.803] |
| <b>Covariates</b>             |                            |                            |                            |                            |                            |                            |                            |                         |
| Birth interval                | 0.997***<br>[0.997, 0.998] | 0.998***<br>[0.997, 0.998] | 0.999***<br>[0.999, 1.000] | 0.999***<br>[0.999, 1.000] | 1.001<br>[1.000, 1.001]    | 0.999**<br>[0.999, 1.000]  | 0.994***<br>[0.992, 0.996] |                         |
| Birth order                   | 1.056***<br>[1.041, 1.071] | 1.096***<br>[1.080, 1.112] | 1.115***<br>[1.086, 1.146] | 0.987**<br>[0.977, 0.998]  | 1.663***<br>[1.581, 1.749] | 0.968**<br>[0.942, 0.994]  | 0.394***<br>[0.373, 0.417] |                         |
| Age (months)                  | 1.008***<br>[1.007, 1.008] | 1.007***<br>[1.006, 1.007] | 0.990***<br>[0.989, 0.991] | 0.989***<br>[0.988, 0.989] | 0.982***<br>[0.981, 0.983] | 0.999***<br>[0.998, 0.999] | 0.981***<br>[0.980, 0.983] |                         |
| Female                        | 0.967***<br>[0.956, 0.978] | 0.974***<br>[0.962, 0.987] | 0.915***<br>[0.898, 0.931] | 1.005<br>[0.997, 1.013]    | 0.948***<br>[0.924, 0.972] | 1.128***<br>[1.106, 1.152] | 0.820***<br>[0.787, 0.855] |                         |
| First born                    | 0.856***<br>[0.837, 0.875] | 0.891***<br>[0.871, 0.911] | 0.983<br>[0.948, 1.019]    | 0.952***<br>[0.938, 0.966] | 1.047*<br>[0.996, 1.100]   | 1.104***<br>[1.062, 1.148] | 0.947<br>[0.868, 1.033]    |                         |
| Delivered at home             | 1.016**<br>[1.002, 1.030]  | 1.054***<br>[1.037, 1.071] | 1.050***<br>[1.022, 1.079] | 1.006<br>[0.994, 1.019]    | 0.968<br>[0.930, 1.008]    | 1.175***<br>[1.125, 1.226] | 1.116***<br>[1.058, 1.177] |                         |
| Mother's age at birth         | 0.958***<br>[0.949, 0.967] | 0.965***<br>[0.956, 0.974] | 0.988*<br>[0.973, 1.002]   | 0.994*<br>[0.988, 1.001]   | 0.980<br>[0.956, 1.004]    | 0.953***<br>[0.936, 0.971] | 0.899***<br>[0.872, 0.927] |                         |
| Mother's age at birth squared | 1.001***<br>[1.000, 1.001] | 1.001***<br>[1.000, 1.001] | 1.000**<br>[1.000, 1.001]  | 1.000<br>[1.000, 1.000]    | 1.000<br>[1.000, 1.001]    | 1.001***<br>[1.001, 1.001] | 1.002***<br>[1.002, 1.003] |                         |

|                                   |                            |                            |                            |                            |                            |                            |                            |
|-----------------------------------|----------------------------|----------------------------|----------------------------|----------------------------|----------------------------|----------------------------|----------------------------|
| Maternal height (z-score)         | 0.809***<br>[0.802, 0.817] | 0.818***<br>[0.812, 0.825] | 0.962***<br>[0.952, 0.973] | 0.990***<br>[0.986, 0.995] | 1.021***<br>[1.005, 1.036] | 0.878***<br>[0.867, 0.889] | 0.916***<br>[0.896, 0.937] |
| Received no vaccination           | 0.957***<br>[0.935, 0.981] | 0.972**<br>[0.948, 0.996]  | 1.053***<br>[1.014, 1.093] | 1.014*<br>[0.998, 1.031]   | 0.874***<br>[0.815, 0.936] |                            |                            |
| Siblings ever born                | 0.961***<br>[0.948, 0.975] | 0.927***<br>[0.914, 0.940] | 0.897***<br>[0.875, 0.919] | 1.022***<br>[1.012, 1.032] | 0.600***<br>[0.571, 0.630] | 1.001<br>[0.976, 1.026]    | 3.036***<br>[2.883, 3.196] |
| Mother's education: none          | RC                         |
| Mother's education: primary       | 0.973***<br>[0.957, 0.989] | 0.964***<br>[0.946, 0.982] | 0.962**<br>[0.933, 0.992]  | 0.985**<br>[0.973, 0.998]  | 1.123***<br>[1.073, 1.176] | 1.006<br>[0.970, 1.043]    | 1.119***<br>[1.050, 1.192] |
| Mother's education: secondary     | 0.889***<br>[0.875, 0.904] | 0.906***<br>[0.889, 0.923] | 0.968**<br>[0.941, 0.996]  | 0.954***<br>[0.944, 0.965] | 1.061**<br>[1.014, 1.111]  | 0.959**<br>[0.928, 0.991]  | 0.966<br>[0.907, 1.029]    |
| Mother's education: higher        | 0.749***<br>[0.724, 0.776] | 0.752***<br>[0.723, 0.782] | 0.913***<br>[0.874, 0.955] | 0.901***<br>[0.883, 0.919] | 0.968<br>[0.901, 1.039]    | 0.816***<br>[0.775, 0.859] | 0.849***<br>[0.753, 0.958] |
| Wealth quintile: first            | RC                         |
| Wealth quintile: second           | 1.016<br>[0.991, 1.041]    | 0.981<br>[0.955, 1.008]    | 0.984<br>[0.943, 1.026]    | 1.019*<br>[1.000, 1.038]   | 1.037<br>[0.971, 1.107]    | 1.059**<br>[1.003, 1.117]  | 1.093*<br>[0.995, 1.201]   |
| Wealth quintile: third            | 1.001<br>[0.961, 1.044]    | 0.922***<br>[0.882, 0.963] | 0.973<br>[0.907, 1.043]    | 1.042***<br>[1.012, 1.074] | 1.036<br>[0.929, 1.155]    | 1.105**<br>[1.017, 1.201]  | 1.210**<br>[1.033, 1.418]  |
| Wealth quintile: fourth           | 0.962<br>[0.907, 1.020]    | 0.899***<br>[0.845, 0.957] | 0.965<br>[0.876, 1.064]    | 1.015<br>[0.974, 1.058]    | 1.019<br>[0.873, 1.189]    | 1.197***<br>[1.073, 1.336] | 1.298**<br>[1.036, 1.625]  |
| Wealth quintile: fifth            | 0.893***<br>[0.822, 0.970] | 0.814***<br>[0.747, 0.886] | 0.972<br>[0.858, 1.101]    | 1.031<br>[0.977, 1.088]    | 0.982<br>[0.805, 1.198]    | 1.221***<br>[1.065, 1.399] | 1.436**<br>[1.059, 1.947]  |
| Caste/tribe: schedule caste       | RC                         |
| Caste/tribe: schedule tribe       | 1.001<br>[0.975, 1.027]    | 1.037**<br>[1.009, 1.067]  | 1.085***<br>[1.041, 1.131] | 1.058***<br>[1.035, 1.081] | 0.930*<br>[0.865, 1.001]   | 1.013<br>[0.965, 1.063]    | 0.920*<br>[0.835, 1.013]   |
| Caste/tribe: other backward class | 0.971***<br>[0.956, 0.986] | 0.978***<br>[0.961, 0.994] | 1.007<br>[0.983, 1.032]    | 0.971***<br>[0.960, 0.982] | 0.977<br>[0.937, 1.018]    | 0.991<br>[0.963, 1.020]    | 0.952*<br>[0.905, 1.002]   |
| Caste/tribe: none of them         | 0.912***<br>[0.892, 0.932] | 0.924***<br>[0.903, 0.945] | 0.975<br>[0.943, 1.007]    | 0.978***<br>[0.964, 0.991] | 0.991<br>[0.945, 1.040]    | 0.967*<br>[0.935, 1.001]   | 0.930*<br>[0.864, 1.001]   |
| Caste/tribe: don't know           | 0.950*<br>[0.898, 1.006]   | 0.975<br>[0.920, 1.035]    | 1.037<br>[0.954, 1.128]    | 1.014<br>[0.973, 1.056]    | 1.013<br>[0.875, 1.171]    | 1.013<br>[0.914, 1.124]    | 0.906<br>[0.738, 1.113]    |
| Singleton birth                   | RC                         |

|                              |                |                |                |                |                |                |                |         |
|------------------------------|----------------|----------------|----------------|----------------|----------------|----------------|----------------|---------|
| First born twin/triplet etc. | 1.194***       | 1.340***       | 1.272***       | 1.037*         | 1.083          | 3.848***       | 1.116*         |         |
|                              | [1.126, 1.266] | [1.264, 1.421] | [1.161, 1.394] | [0.996, 1.079] | [0.891, 1.316] | [3.641, 4.066] | [0.983, 1.268] |         |
| Later born twin/triplet etc. | 1.149***       | 1.303***       | 1.235***       | 1.056***       | 1.010          | 4.191***       | 4.579***       |         |
|                              | [1.083, 1.220] | [1.232, 1.378] | [1.135, 1.343] | [1.014, 1.100] | [0.861, 1.185] | [3.958, 4.437] | [4.046, 5.183] |         |
| Observations                 | 204,238        | 204,238        | 204,238        | 191,324        | 221,156        | 172,831        | 231,579        | 601,509 |

Notes: \*\*\* p<0.01, \*\* p<0.05, \* p<0.1. Prevalence ratios are shown. All estimates were weighted (with sampling weight averaged over districts) and tests for statistical significance and 95% confidence intervals (shown in brackets) were calculated using robust standard errors. All estimates in each column were obtained from a single model. Control variables: sex, age, maternal age at birth, birth order, birth interval, firstborn, twin, vaccination status (except for mortality and low birth weight), born at home, maternal education, caste/tribe, and wealth index quintiles. Models were further adjusted for unobserved district-level factors. Proportions are for all households interviewed. Acronyms and abbreviations: liquefied petroleum gas (LPG), reinforced cement concrete (RCC), reinforced brick concrete (RBC), galvanized iron (GI), granite (grani.), shared (sh.), sewer system (sewer s.), without (w/o), with(w/), reverse osmosis (RO), reference category (RC).

Table A4. Results from Poisson regressions. Excluding fixed effects.

|                                       | <u>Stunting</u> | <u>Underweight</u> | <u>Wasting</u> | <u>Anemia</u>  | <u>Diarrhea</u> | <u>Low birth weight</u> | <u>Mortality</u> | <u>Proportion (households)</u> |
|---------------------------------------|-----------------|--------------------|----------------|----------------|-----------------|-------------------------|------------------|--------------------------------|
| <b>a) Water and toilet facilities</b> |                 |                    |                |                |                 |                         |                  |                                |
| Water pump                            | 0.976*          | 0.978              | 0.952**        | 1.000          | 1.044           | 0.985                   | 1.017            | 0.172                          |
|                                       | [0.951, 1.002]  | [0.950, 1.006]     | [0.914, 0.991] | [0.982, 1.018] | [0.985, 1.106]  | [0.941, 1.031]          | [0.936, 1.106]   | [0.169, 0.176]                 |
| Toilet: no facility/bush/field        | RC              | RC                 | RC             | RC             | RC              | RC                      | RC               | 0.389                          |
|                                       |                 |                    |                |                |                 |                         |                  | [0.383, 0.395]                 |
| Toilet: flush to piped sewer system   | 0.979           | 0.995              | 1.023          | 1.010          | 0.932           | 0.972                   | 0.763**          | 0.078                          |
|                                       | [0.913, 1.051]  | [0.927, 1.067]     | [0.931, 1.124] | [0.968, 1.053] | [0.805, 1.079]  | [0.881, 1.072]          | [0.603, 0.964]   | [0.074, 0.083]                 |
| Toilet: composting toilet             | 0.962           | 0.984              | 1.083          | 1.008          | 1.019           | 0.781                   | 0.436*           | 0.001                          |
|                                       | [0.789, 1.174]  | [0.808, 1.199]     | [0.810, 1.449] | [0.879, 1.155] | [0.649, 1.601]  | [0.531, 1.148]          | [0.178, 1.067]   | [0.001, 0.001]                 |
| Toilet: dry toilet                    | 0.802**         | 0.678***           | 0.806*         | 0.933          | 0.865           | 1.142                   | 1.199            | 0.004                          |
|                                       | [0.656, 0.980]  | [0.551, 0.834]     | [0.640, 1.015] | [0.843, 1.034] | [0.640, 1.167]  | [0.861, 1.516]          | [0.751, 1.914]   | [0.003, 0.004]                 |
| Toilet: other                         | 0.990           | 0.882              | 0.792          | 1.093          | 0.832           | 1.171                   | 0.182*           | 0.001                          |
|                                       | [0.576, 1.701]  | [0.506, 1.539]     | [0.409, 1.535] | [0.907, 1.317] | [0.410, 1.685]  | [0.517, 2.654]          | [0.025, 1.312]   | [0.001, 0.001]                 |
| Toilet: sh. Flush to piped sewer s.   | 1.155***        | 1.093              | 0.892          | 1.106***       | 1.072           | 1.000                   | 1.275            | 0.012                          |
|                                       | [1.036, 1.287]  | [0.977, 1.223]     | [0.745, 1.068] | [1.042, 1.173] | [0.855, 1.344]  | [0.849, 1.179]          | [0.922, 1.762]   | [0.010, 0.013]                 |
| Toilet: shared flush to septic tank   | 0.931***        | 0.944**            | 0.893***       | 1.014          | 1.115**         | 1.054                   | 1.108            | 0.054                          |
|                                       | [0.890, 0.973]  | [0.901, 0.990]     | [0.830, 0.960] | [0.983, 1.046] | [1.012, 1.229]  | [0.971, 1.145]          | [0.965, 1.271]   | [0.052, 0.057]                 |
| Toilet: shared flush to pit latrine   | 0.907***        | 0.850***           | 0.887**        | 0.968          | 0.959           | 0.964                   | 1.132            | 0.014                          |
|                                       | [0.845, 0.973]  | [0.785, 0.921]     | [0.787, 0.999] | [0.921, 1.018] | [0.815, 1.127]  | [0.848, 1.095]          | [0.927, 1.383]   | [0.013, 0.015]                 |
| Toilet: sh. Flush to somewhere else   | 0.578***        | 0.826              | 1.075          | 0.945          | 1.039           | 1.616***                | 1.043            | 0.004                          |
|                                       | [0.385, 0.867]  | [0.585, 1.167]     | [0.773, 1.496] | [0.788, 1.133] | [0.632, 1.706]  | [1.187, 2.199]          | [0.547, 1.988]   | [0.003, 0.005]                 |
| Toilet: sh. Flush don't know where    | 1.152           | 1.337              | 1.760**        | 1.021          | 0.247**         | 0.669                   | 1.555            | 0.000                          |
|                                       | [0.688, 1.932]  | [0.842, 2.123]     | [1.050, 2.951] | [0.756, 1.379] | [0.070, 0.876]  | [0.224, 1.997]          | [0.471, 5.132]   | [0.000, 0.000]                 |
| Toilet: sh. Ventilated improved pit   | 0.800           | 0.750*             | 0.822          | 1.035          | 0.886           | 1.305                   | 0.956            | 0.001                          |
|                                       | [0.606, 1.056]  | [0.547, 1.029]     | [0.565, 1.195] | [0.884, 1.213] | [0.525, 1.496]  | [0.861, 1.978]          | [0.457, 1.998]   | [0.001, 0.002]                 |
| Toilet: shared pit latrine w/ slab    | 0.912*          | 0.924              | 0.865          | 0.934*         | 0.708***        | 1.016                   | 0.924            | 0.009                          |
|                                       | [0.818, 1.016]  | [0.825, 1.035]     | [0.720, 1.038] | [0.868, 1.005] | [0.553, 0.906]  | [0.843, 1.225]          | [0.644, 1.325]   | [0.009, 0.010]                 |
| Toilet: flush to septic tank          | 0.919***        | 0.913***           | 0.953**        | 0.952***       | 0.926**         | 0.963                   | 0.824***         | 0.287                          |
|                                       | [0.892, 0.946]  | [0.884, 0.942]     | [0.910, 0.998] | [0.933, 0.972] | [0.865, 0.991]  | [0.914, 1.015]          | [0.749, 0.906]   | [0.283, 0.292]                 |
| Toilet: sh. Pit w/o slab/open pit     | 1.050           | 0.975              | 0.972          | 0.904**        | 1.131           | 1.099                   | 0.967            | 0.003                          |
|                                       | [0.942, 1.171]  | [0.854, 1.113]     | [0.785, 1.203] | [0.819, 0.997] | [0.825, 1.552]  | [0.881, 1.371]          | [0.655, 1.427]   | [0.003, 0.003]                 |
| Toilet: shared composting toilet      | 1.100           | 1.033              | 0.381**        | 0.696          | 0.196***        | 0.510                   | 0.961            | 0.000                          |
|                                       | [0.712, 1.699]  | [0.616, 1.732]     | [0.169, 0.858] | [0.421, 1.149] | [0.068, 0.562]  | [0.219, 1.189]          | [0.419, 2.203]   | [0.000, 0.001]                 |
| Toilet: shared dry toilet             | 0.931           | 0.721**            | 0.566***       | 1.033          | 0.689           | 0.613*                  | 0.743            | 0.001                          |

|                                   |                |                |                |                |                |                |                |                |
|-----------------------------------|----------------|----------------|----------------|----------------|----------------|----------------|----------------|----------------|
|                                   | [0.731, 1.185] | [0.533, 0.974] | [0.376, 0.852] | [0.885, 1.206] | [0.377, 1.258] | [0.367, 1.025] | [0.397, 1.391] | [0.001, 0.001] |
| Toilet: shared other              | 0.686*         | 1.119          | 1.470          | 1.292***       | 0.551**        | 1.056          | 1.179          | 0.002          |
|                                   | [0.457, 1.029] | [0.789, 1.587] | [0.905, 2.390] | [1.129, 1.479] | [0.304, 0.999] | [0.688, 1.620] | [0.542, 2.565] | [0.001, 0.002] |
| Toilet: flush to pit latrine      | 0.944***       | 0.930***       | 0.907***       | 0.959***       | 0.908**        | 0.952          | 0.830***       | 0.072          |
|                                   | [0.908, 0.982] | [0.888, 0.973] | [0.855, 0.962] | [0.934, 0.986] | [0.835, 0.988] | [0.891, 1.017] | [0.735, 0.938] | [0.070, 0.074] |
| Toilet: flush to somewhere else   | 0.927          | 0.944          | 0.852          | 1.004          | 0.645***       | 0.867          | 0.892          | 0.009          |
|                                   | [0.811, 1.059] | [0.808, 1.102] | [0.689, 1.054] | [0.907, 1.111] | [0.480, 0.867] | [0.688, 1.093] | [0.597, 1.334] | [0.008, 0.010] |
| Toilet: flush don't know where    | 1.034          | 0.668**        | 0.777          | 1.102          | 1.185          | 1.034          | 0.851          | 0.001          |
|                                   | [0.802, 1.334] | [0.482, 0.925] | [0.462, 1.306] | [0.895, 1.355] | [0.625, 2.246] | [0.659, 1.622] | [0.372, 1.946] | [0.001, 0.001] |
| Toilet: ventilated improved pit   | 0.898          | 0.802***       | 0.764***       | 0.913*         | 1.086          | 0.931          | 1.195          | 0.006          |
|                                   | [0.785, 1.028] | [0.691, 0.932] | [0.628, 0.930] | [0.833, 1.001] | [0.847, 1.394] | [0.774, 1.120] | [0.814, 1.756] | [0.005, 0.006] |
| Toilet: pit latrine with slab     | 0.896***       | 0.839***       | 0.852***       | 0.917***       | 0.822***       | 0.958          | 0.972          | 0.039          |
|                                   | [0.851, 0.944] | [0.794, 0.887] | [0.784, 0.926] | [0.884, 0.951] | [0.728, 0.929] | [0.882, 1.039] | [0.827, 1.142] | [0.038, 0.041] |
| Toilet: pit without slab/open pit | 0.950          | 0.855***       | 0.907*         | 0.799***       | 0.795**        | 1.019          | 0.837*         | 0.011          |
|                                   | [0.889, 1.015] | [0.794, 0.919] | [0.818, 1.005] | [0.757, 0.843] | [0.663, 0.954] | [0.895, 1.159] | [0.684, 1.026] | [0.011, 0.012] |
| Water: tube well or borehole      | RC             | 0.392          |
|                                   |                |                |                |                |                |                |                | [0.386, 0.399] |
| Water: piped into dwelling        | 0.997          | 1.028          | 1.094***       | 1.028**        | 0.889***       | 1.101***       | 0.834***       | 0.166          |
|                                   | [0.961, 1.034] | [0.989, 1.068] | [1.036, 1.155] | [1.003, 1.054] | [0.821, 0.963] | [1.041, 1.165] | [0.741, 0.940] | [0.161, 0.171] |
| Water: rainwater                  | 0.976          | 0.775**        | 0.828          | 0.722***       | 0.706          | 0.884          | 0.636          | 0.002          |
|                                   | [0.813, 1.173] | [0.626, 0.959] | [0.612, 1.119] | [0.622, 0.838] | [0.452, 1.104] | [0.613, 1.273] | [0.343, 1.180] | [0.001, 0.002] |
| Water: tanker truck               | 1.003          | 0.950          | 0.899          | 0.918*         | 0.753**        | 1.116*         | 0.855          | 0.013          |
|                                   | [0.930, 1.083] | [0.868, 1.039] | [0.767, 1.055] | [0.837, 1.007] | [0.576, 0.983] | [0.981, 1.270] | [0.633, 1.154] | [0.011, 0.016] |
| Water: cart with small tank       | 0.842          | 0.896          | 1.114          | 0.923          | 0.912          | 1.032          | 1.535*         | 0.002          |
|                                   | [0.669, 1.060] | [0.697, 1.153] | [0.841, 1.476] | [0.803, 1.060] | [0.574, 1.449] | [0.718, 1.483] | [0.998, 2.359] | [0.001, 0.002] |
| Water: bottled water              | 0.928          | 0.956          | 0.947          | 1.029          | 1.001          | 1.019          | 0.830          | 0.031          |
|                                   | [0.847, 1.017] | [0.873, 1.047] | [0.843, 1.063] | [0.978, 1.083] | [0.841, 1.191] | [0.896, 1.159] | [0.626, 1.099] | [0.029, 0.033] |
| Water: community RO plant         | 0.893*         | 0.843*         | 1.032          | 1.001          | 1.136          | 0.995          | 1.272          | 0.005          |
|                                   | [0.781, 1.022] | [0.707, 1.006] | [0.839, 1.269] | [0.912, 1.098] | [0.853, 1.511] | [0.805, 1.230] | [0.763, 2.120] | [0.005, 0.006] |
| Water: other                      | 0.879          | 0.982          | 0.826          | 1.039          | 1.428*         | 0.861          | 1.129          | 0.002          |
|                                   | [0.732, 1.056] | [0.817, 1.181] | [0.615, 1.109] | [0.897, 1.203] | [0.969, 2.102] | [0.597, 1.242] | [0.627, 2.033] | [0.001, 0.002] |
| Water: piped to yard/plot         | 1.010          | 1.042**        | 1.111***       | 0.978*         | 0.897***       | 1.014          | 0.901*         | 0.136          |
|                                   | [0.978, 1.043] | [1.008, 1.078] | [1.057, 1.167] | [0.955, 1.001] | [0.830, 0.970] | [0.958, 1.074] | [0.807, 1.006] | [0.132, 0.139] |
| Water: public tap/standpipe       | 0.983          | 0.988          | 1.049**        | 1.008          | 0.860***       | 1.018          | 0.971          | 0.159          |
|                                   | [0.956, 1.010] | [0.960, 1.017] | [1.004, 1.096] | [0.987, 1.029] | [0.803, 0.922] | [0.968, 1.071] | [0.885, 1.066] | [0.155, 0.163] |
| Water: protected well             | 0.964          | 0.931**        | 0.992          | 0.904***       | 0.723***       | 1.063          | 0.664***       | 0.037          |

|                                        |                |                |                |                |                |                |                |                |
|----------------------------------------|----------------|----------------|----------------|----------------|----------------|----------------|----------------|----------------|
|                                        | [0.910, 1.021] | [0.876, 0.990] | [0.915, 1.075] | [0.865, 0.944] | [0.625, 0.835] | [0.971, 1.164] | [0.547, 0.806] | [0.034, 0.039] |
| Water: unprotected well                | 0.968**        | 1.007          | 1.094***       | 0.986          | 0.868***       | 1.005          | 0.899*         | 0.042          |
|                                        | [0.938, 0.998] | [0.976, 1.039] | [1.042, 1.147] | [0.964, 1.009] | [0.792, 0.952] | [0.947, 1.065] | [0.807, 1.002] | [0.041, 0.044] |
| Water: protected spring                | 0.885**        | 0.838***       | 0.987          | 0.963          | 1.014          | 1.083          | 0.603***       | 0.003          |
|                                        | [0.790, 0.992] | [0.742, 0.946] | [0.834, 1.170] | [0.894, 1.037] | [0.786, 1.309] | [0.873, 1.342] | [0.428, 0.849] | [0.003, 0.004] |
| Water: unprotected spring              | 0.916*         | 0.869***       | 0.967          | 0.943          | 0.844          | 1.163*         | 0.666***       | 0.004          |
|                                        | [0.839, 1.000] | [0.801, 0.943] | [0.843, 1.110] | [0.877, 1.014] | [0.673, 1.059] | [0.984, 1.374] | [0.515, 0.862] | [0.004, 0.004] |
| Water: river/dam/lake/ponds etc.       | 0.923**        | 0.884***       | 1.023          | 0.861***       | 0.835          | 0.837*         | 0.820*         | 0.007          |
|                                        | [0.855, 0.995] | [0.806, 0.969] | [0.904, 1.157] | [0.806, 0.920] | [0.652, 1.068] | [0.697, 1.006] | [0.651, 1.033] | [0.006, 0.007] |
| <b>b) Food storage and preparation</b> |                |                |                |                |                |                |                |                |
| Refrigerator                           | 0.945***       | 0.921***       | 0.916***       | 0.980*         | 1.015          | 1.028          | 0.954          | 0.296          |
|                                        | [0.911, 0.980] | [0.885, 0.959] | [0.872, 0.963] | [0.958, 1.002] | [0.941, 1.094] | [0.971, 1.089] | [0.851, 1.069] | [0.291, 0.302] |
| Pressure cooker                        | 1.009          | 0.985          | 0.995          | 1.011          | 1.148***       | 0.996          | 1.041          | 0.566          |
|                                        | [0.987, 1.033] | [0.961, 1.009] | [0.961, 1.031] | [0.995, 1.028] | [1.087, 1.212] | [0.953, 1.040] | [0.972, 1.115] | [0.561, 0.572] |
| Cooking: wood                          | RC             | 0.405          |
|                                        |                |                |                |                |                |                |                | [0.399, 0.411] |
| Cooking: electricity                   | 1.130          | 0.931          | 0.798**        | 0.967          | 0.960          | 0.835          | 1.283          | 0.006          |
|                                        | [0.971, 1.314] | [0.793, 1.094] | [0.646, 0.986] | [0.872, 1.072] | [0.698, 1.319] | [0.665, 1.047] | [0.679, 2.421] | [0.006, 0.007] |
| Cooking: animal dung                   | 1.014          | 1.022*         | 0.954**        | 1.013          | 1.118***       | 0.948**        | 1.012          | 0.072          |
|                                        | [0.992, 1.035] | [0.998, 1.047] | [0.916, 0.992] | [0.996, 1.030] | [1.053, 1.187] | [0.899, 0.999] | [0.938, 1.093] | [0.069, 0.074] |
| Cooking: no food cooked in house       | 1.715**        | 1.676*         | 1.458          | 1.262*         | 1.640          | 0.000***       | 1.841          | 0.003          |
|                                        | [1.040, 2.827] | [0.996, 2.819] | [0.857, 2.481] | [0.994, 1.604] | [0.431, 6.233] | [0.000, 0.000] | [0.357, 9.487] | [0.002, 0.003] |
| Cooking: other                         | 1.159          | 1.082          | 0.978          | 0.959          | 1.068          | 0.800          | 0.303          | 0.000          |
|                                        | [0.853, 1.574] | [0.706, 1.660] | [0.542, 1.767] | [0.721, 1.275] | [0.480, 2.378] | [0.316, 2.029] | [0.047, 1.935] | [0.000, 0.001] |
| Cooking: LPG/natural gas               | 0.949***       | 0.946***       | 0.954**        | 1.007          | 1.110***       | 0.943**        | 0.979          | 0.423          |
|                                        | [0.920, 0.978] | [0.915, 0.978] | [0.911, 0.998] | [0.986, 1.028] | [1.037, 1.187] | [0.897, 0.991] | [0.887, 1.080] | [0.416, 0.430] |
| Cooking: biogas                        | 0.918          | 0.883          | 0.813**        | 1.078*         | 0.828          | 0.902          | 1.195          | 0.008          |
|                                        | [0.794, 1.063] | [0.760, 1.025] | [0.670, 0.986] | [0.987, 1.176] | [0.583, 1.175] | [0.738, 1.102] | [0.793, 1.799] | [0.007, 0.009] |
| Cooking: kerosene                      | 0.983          | 1.084          | 1.000          | 0.972          | 0.919          | 0.963          | 0.986          | 0.012          |
|                                        | [0.869, 1.112] | [0.958, 1.226] | [0.858, 1.164] | [0.881, 1.072] | [0.682, 1.237] | [0.804, 1.152] | [0.657, 1.478] | [0.011, 0.013] |
| Cooking: coal, lignite                 | 1.003          | 1.083**        | 1.226***       | 1.033          | 1.001          | 0.808**        | 0.964          | 0.009          |
|                                        | [0.927, 1.086] | [1.012, 1.158] | [1.098, 1.368] | [0.976, 1.094] | [0.822, 1.220] | [0.684, 0.953] | [0.752, 1.235] | [0.008, 0.010] |
| Cooking: charcoal                      | 0.958          | 1.063          | 0.970          | 1.048          | 0.904          | 0.807*         | 0.919          | 0.006          |
|                                        | [0.846, 1.084] | [0.964, 1.172] | [0.828, 1.135] | [0.977, 1.124] | [0.688, 1.188] | [0.648, 1.004] | [0.637, 1.324] | [0.005, 0.006] |
| Cooking: straw/shrubs/grass            | 1.005          | 0.968          | 0.916**        | 0.998          | 1.089          | 0.949          | 0.932          | 0.025          |
|                                        | [0.964, 1.047] | [0.924, 1.013] | [0.845, 0.994] | [0.967, 1.031] | [0.975, 1.216] | [0.857, 1.051] | [0.800, 1.086] | [0.024, 0.027] |

|                                |                            |                            |                            |                            |                            |                            |                            |                         |
|--------------------------------|----------------------------|----------------------------|----------------------------|----------------------------|----------------------------|----------------------------|----------------------------|-------------------------|
| Cooking: agricultural crop     | 0.995<br>[0.961, 1.029]    | 1.004<br>[0.968, 1.043]    | 0.984<br>[0.917, 1.057]    | 1.015<br>[0.987, 1.044]    | 1.104*<br>[0.995, 1.225]   | 0.927*<br>[0.853, 1.007]   | 0.895*<br>[0.792, 1.012]   | 0.030<br>[0.028, 0.032] |
| <b>c) Other consumer goods</b> |                            |                            |                            |                            |                            |                            |                            |                         |
| Radio                          | 0.980<br>[0.949, 1.012]    | 0.996<br>[0.961, 1.032]    | 0.981<br>[0.932, 1.032]    | 1.010<br>[0.988, 1.032]    | 1.002<br>[0.932, 1.078]    | 1.055*<br>[0.996, 1.118]   | 0.950<br>[0.854, 1.058]    | 0.081<br>[0.080, 0.083] |
| Bicycle                        | 0.966***<br>[0.950, 0.983] | 0.964***<br>[0.946, 0.981] | 0.994<br>[0.968, 1.020]    | 0.970***<br>[0.958, 0.982] | 0.999<br>[0.960, 1.040]    | 0.990<br>[0.958, 1.023]    | 0.976<br>[0.922, 1.032]    | 0.521<br>[0.516, 0.526] |
| Motorcycle/scooter             | 0.968***<br>[0.946, 0.990] | 0.980*<br>[0.957, 1.004]   | 0.992<br>[0.958, 1.026]    | 0.982**<br>[0.967, 0.997]  | 0.957*<br>[0.910, 1.006]   | 0.970<br>[0.932, 1.010]    | 0.895***<br>[0.835, 0.960] | 0.377<br>[0.372, 0.381] |
| Car/truck                      | 0.930**<br>[0.869, 0.996]  | 0.899***<br>[0.838, 0.964] | 0.952<br>[0.878, 1.032]    | 0.980<br>[0.943, 1.019]    | 0.852**<br>[0.753, 0.964]  | 1.009<br>[0.928, 1.097]    | 0.941<br>[0.775, 1.143]    | 0.060<br>[0.058, 0.063] |
| Telephone (land-line)          | 0.934<br>[0.843, 1.035]    | 0.982<br>[0.885, 1.089]    | 1.126**<br>[1.014, 1.251]  | 0.940*<br>[0.883, 1.001]   | 0.828*<br>[0.679, 1.011]   | 0.941<br>[0.833, 1.064]    | 0.849<br>[0.622, 1.158]    | 0.039<br>[0.037, 0.041] |
| Mobile telephone               | 0.981<br>[0.957, 1.005]    | 0.947***<br>[0.923, 0.972] | 0.915***<br>[0.877, 0.955] | 0.988<br>[0.970, 1.006]    | 1.014<br>[0.943, 1.090]    | 0.897***<br>[0.849, 0.948] | 0.991<br>[0.908, 1.081]    | 0.904<br>[0.902, 0.906] |
| Watch                          | 0.998<br>[0.980, 1.017]    | 1.014<br>[0.994, 1.034]    | 1.042**<br>[1.010, 1.076]  | 0.977***<br>[0.964, 0.990] | 0.945**<br>[0.900, 0.992]  | 0.970<br>[0.931, 1.011]    | 0.934**<br>[0.877, 0.996]  | 0.781<br>[0.778, 0.785] |
| Mattress                       | 1.012<br>[0.994, 1.031]    | 1.012<br>[0.992, 1.032]    | 0.981<br>[0.950, 1.012]    | 1.000<br>[0.985, 1.015]    | 1.046*<br>[0.995, 1.099]   | 1.025<br>[0.984, 1.067]    | 1.048<br>[0.985, 1.116]    | 0.667<br>[0.662, 0.672] |
| Chair                          | 0.959***<br>[0.940, 0.978] | 0.969***<br>[0.948, 0.989] | 0.999<br>[0.967, 1.032]    | 0.983**<br>[0.969, 0.997]  | 0.948**<br>[0.900, 0.999]  | 0.909***<br>[0.870, 0.949] | 0.838***<br>[0.782, 0.898] | 0.762<br>[0.758, 0.765] |
| Cot/bed                        | 1.034**<br>[1.004, 1.066]  | 1.011<br>[0.980, 1.043]    | 0.967<br>[0.922, 1.014]    | 1.037***<br>[1.014, 1.061] | 1.016<br>[0.936, 1.104]    | 1.012<br>[0.954, 1.074]    | 0.919*<br>[0.838, 1.007]   | 0.884<br>[0.881, 0.887] |
| Table                          | 0.997<br>[0.976, 1.018]    | 0.976**<br>[0.954, 0.999]  | 0.928***<br>[0.896, 0.961] | 0.974***<br>[0.959, 0.990] | 0.869***<br>[0.824, 0.916] | 0.929***<br>[0.890, 0.969] | 0.928*<br>[0.861, 1.000]   | 0.554<br>[0.550, 0.559] |
| Electric fan                   | 0.974**<br>[0.953, 0.997]  | 1.030**<br>[1.006, 1.055]  | 1.043**<br>[1.003, 1.084]  | 1.016*<br>[0.999, 1.034]   | 0.964<br>[0.905, 1.027]    | 1.021<br>[0.972, 1.072]    | 0.938<br>[0.864, 1.017]    | 0.782<br>[0.777, 0.786] |
| Black and white television     | 0.976<br>[0.934, 1.019]    | 0.953*<br>[0.907, 1.001]   | 0.955<br>[0.895, 1.020]    | 1.002<br>[0.967, 1.038]    | 1.090*<br>[0.991, 1.200]   | 1.075**<br>[1.000, 1.155]  | 1.109<br>[0.975, 1.262]    | 0.033<br>[0.032, 0.034] |
| Color television               | 0.950***<br>[0.928, 0.971] | 0.954***<br>[0.931, 0.978] | 0.996<br>[0.961, 1.033]    | 0.971***<br>[0.955, 0.987] | 0.914***<br>[0.864, 0.967] | 0.995<br>[0.952, 1.040]    | 0.914**<br>[0.844, 0.990]  | 0.635<br>[0.630, 0.640] |
| Sewing machine                 | 1.005<br>[0.981, 1.029]    | 1.015<br>[0.989, 1.042]    | 0.997<br>[0.962, 1.034]    | 1.028***<br>[1.011, 1.045] | 1.151***<br>[1.092, 1.213] | 1.015<br>[0.974, 1.059]    | 0.979<br>[0.904, 1.060]    | 0.240<br>[0.237, 0.243] |
| Computer                       | 1.017<br>[0.948, 1.091]    | 0.965<br>[0.896, 1.040]    | 1.025<br>[0.942, 1.116]    | 0.937***<br>[0.896, 0.980] | 0.970<br>[0.859, 1.094]    | 0.898**<br>[0.814, 0.992]  | 0.886<br>[0.687, 1.142]    | 0.090<br>[0.087, 0.093] |
| Air conditioner/cooler         | 1.086***<br>[1.086, 1.086] | 1.107***<br>[1.107, 1.107] | 1.047*<br>[1.047, 1.047]   | 1.046***<br>[1.046, 1.046] | 1.126***<br>[1.126, 1.126] | 1.047*<br>[1.047, 1.047]   | 1.068<br>[1.068, 1.068]    | 0.179<br>[0.179, 0.179] |

|                                     |                |                |                |                |                |                |                |                |
|-------------------------------------|----------------|----------------|----------------|----------------|----------------|----------------|----------------|----------------|
|                                     | [1.051, 1.122] | [1.070, 1.146] | [1.000, 1.097] | [1.024, 1.069] | [1.054, 1.202] | [0.998, 1.099] | [0.973, 1.172] | [0.175, 0.183] |
| Washing machine                     | 0.984          | 0.918***       | 0.899***       | 1.017          | 1.081          | 1.018          | 0.858**        | 0.136          |
|                                     | [0.935, 1.036] | [0.868, 0.972] | [0.839, 0.964] | [0.986, 1.048] | [0.981, 1.192] | [0.948, 1.092] | [0.738, 0.997] | [0.132, 0.140] |
| <b>d) Housing quality</b>           |                |                |                |                |                |                |                |                |
| Residents per bedroom               | 1.012***       | 1.012***       | 0.997          | 1.007***       | 1.015**        | 1.013***       | 0.754***       | 2.917          |
|                                     | [1.008, 1.017] | [1.007, 1.017] | [0.989, 1.004] | [1.003, 1.011] | [1.003, 1.028] | [1.003, 1.022] | [0.739, 0.769] | [2.905, 2.929] |
| Floor: cement                       | RC             | 0.393          |
|                                     |                |                |                |                |                |                |                | [0.388, 0.397] |
| Floor: mud/clay/earth               | 1.037***       | 0.991          | 0.945***       | 1.005          | 1.095***       | 0.994          | 1.081*         | 0.271          |
|                                     | [1.011, 1.064] | [0.965, 1.018] | [0.908, 0.985] | [0.987, 1.024] | [1.030, 1.165] | [0.946, 1.043] | [0.994, 1.176] | [0.266, 0.276] |
| Floor: ceramic tiles                | 1.048          | 1.037          | 1.100**        | 1.001          | 0.835***       | 0.985          | 0.963          | 0.106          |
|                                     | [0.988, 1.111] | [0.977, 1.102] | [1.022, 1.183] | [0.968, 1.037] | [0.744, 0.937] | [0.914, 1.061] | [0.798, 1.163] | [0.102, 0.110] |
| Floor: carpet                       | 1.064          | 1.073          | 1.152          | 1.092*         | 1.035          | 1.037          | 0.859          | 0.006          |
|                                     | [0.907, 1.249] | [0.896, 1.283] | [0.921, 1.441] | [0.999, 1.195] | [0.754, 1.421] | [0.841, 1.279] | [0.579, 1.274] | [0.005, 0.006] |
| Floor: polished stone/marble/grani. | 0.995          | 0.971          | 0.999          | 0.993          | 0.807***       | 0.896***       | 0.965          | 0.077          |
|                                     | [0.939, 1.055] | [0.911, 1.036] | [0.926, 1.078] | [0.957, 1.030] | [0.714, 0.912] | [0.827, 0.972] | [0.764, 1.217] | [0.074, 0.080] |
| Floor: other                        | 0.743*         | 0.786          | 0.979          | 0.876          | 0.951          | 0.808          | 1.325          | 0.001          |
|                                     | [0.545, 1.013] | [0.575, 1.073] | [0.649, 1.477] | [0.690, 1.112] | [0.464, 1.951] | [0.434, 1.506] | [0.660, 2.662] | [0.001, 0.001] |
| Floor: sand                         | 1.039          | 1.048          | 1.039          | 1.024          | 1.429***       | 1.027          | 1.194          | 0.007          |
|                                     | [0.963, 1.121] | [0.961, 1.143] | [0.915, 1.180] | [0.965, 1.087] | [1.172, 1.743] | [0.884, 1.192] | [0.930, 1.533] | [0.007, 0.007] |
| Floor: dung                         | 1.030**        | 1.015          | 0.972          | 1.004          | 1.135***       | 1.108***       | 1.206***       | 0.070          |
|                                     | [1.000, 1.061] | [0.984, 1.047] | [0.927, 1.020] | [0.982, 1.026] | [1.055, 1.220] | [1.046, 1.173] | [1.098, 1.324] | [0.068, 0.072] |
| Floor: raw wood planks              | 0.953          | 0.762***       | 0.697***       | 0.769***       | 0.986          | 0.883          | 1.095          | 0.002          |
|                                     | [0.868, 1.047] | [0.669, 0.868] | [0.579, 0.839] | [0.692, 0.854] | [0.741, 1.313] | [0.699, 1.114] | [0.737, 1.627] | [0.002, 0.003] |
| Floor: palm/bamboo                  | 0.909          | 0.783**        | 0.841          | 0.882**        | 1.093          | 0.802          | 1.164          | 0.002          |
|                                     | [0.792, 1.044] | [0.642, 0.955] | [0.653, 1.084] | [0.780, 0.997] | [0.703, 1.699] | [0.559, 1.149] | [0.743, 1.824] | [0.002, 0.002] |
| Floor: brick                        | 0.984          | 0.961          | 0.967          | 1.016          | 1.107          | 1.059          | 1.087          | 0.008          |
|                                     | [0.902, 1.072] | [0.878, 1.052] | [0.843, 1.109] | [0.962, 1.074] | [0.902, 1.358] | [0.912, 1.229] | [0.842, 1.403] | [0.007, 0.008] |
| Floor: stone                        | 1.073***       | 1.065**        | 0.943*         | 1.022          | 0.795***       | 0.904**        | 1.172**        | 0.055          |
|                                     | [1.023, 1.126] | [1.013, 1.119] | [0.880, 1.011] | [0.991, 1.053] | [0.705, 0.896] | [0.831, 0.982] | [1.007, 1.364] | [0.052, 0.057] |
| Floor: parquet/polished wood        | 1.077          | 0.928          | 1.155          | 0.921          | 1.128          | 0.853          | 0.688          | 0.002          |
|                                     | [0.890, 1.303] | [0.746, 1.153] | [0.916, 1.456] | [0.800, 1.059] | [0.735, 1.731] | [0.588, 1.238] | [0.317, 1.497] | [0.002, 0.002] |
| Floor: vinyl/asphalt strips         | 1.255**        | 1.336***       | 1.273*         | 0.793***       | 1.217          | 0.758          | 0.588          | 0.002          |
|                                     | [1.018, 1.548] | [1.087, 1.642] | [0.968, 1.673] | [0.665, 0.946] | [0.778, 1.905] | [0.521, 1.102] | [0.284, 1.219] | [0.001, 0.002] |
| Roof: RCC/RBC/cement/concrete       | RC             | 0.413          |
|                                     |                |                |                |                |                |                |                | [0.408, 0.419] |

|                                  |                            |                            |                            |                            |                           |                            |                            |                         |
|----------------------------------|----------------------------|----------------------------|----------------------------|----------------------------|---------------------------|----------------------------|----------------------------|-------------------------|
| Roof: no roof                    | 1.049<br>[0.902, 1.219]    | 1.068<br>[0.919, 1.242]    | 0.966<br>[0.728, 1.280]    | 0.976<br>[0.864, 1.102]    | 1.157<br>[0.786, 1.705]   | 1.386*<br>[0.987, 1.947]   | 1.064<br>[0.622, 1.818]    | 0.002<br>[0.002, 0.002] |
| Roof: loosely packed stone       | 1.118***<br>[1.067, 1.171] | 1.096***<br>[1.036, 1.158] | 1.042<br>[0.972, 1.116]    | 1.025<br>[0.992, 1.060]    | 1.033<br>[0.927, 1.152]   | 1.177***<br>[1.095, 1.266] | 1.241***<br>[1.085, 1.418] | 0.023<br>[0.022, 0.025] |
| Roof: metal/GI                   | 0.996<br>[0.964, 1.029]    | 1.014<br>[0.979, 1.050]    | 1.027<br>[0.967, 1.092]    | 0.953***<br>[0.929, 0.976] | 0.911**<br>[0.834, 0.995] | 1.049<br>[0.984, 1.119]    | 1.077<br>[0.963, 1.205]    | 0.110<br>[0.106, 0.113] |
| Roof: wood                       | 1.038<br>[0.964, 1.117]    | 1.129***<br>[1.051, 1.213] | 1.096*<br>[0.983, 1.221]   | 1.078***<br>[1.035, 1.123] | 1.047<br>[0.887, 1.235]   | 1.174***<br>[1.044, 1.320] | 1.102<br>[0.772, 1.573]    | 0.012<br>[0.011, 0.012] |
| Roof: calamine/cement fiber      | 1.084**<br>[1.019, 1.154]  | 1.098***<br>[1.033, 1.166] | 1.076<br>[0.980, 1.181]    | 1.048**<br>[1.010, 1.087]  | 1.027<br>[0.905, 1.165]   | 1.073<br>[0.973, 1.183]    | 1.072<br>[0.901, 1.275]    | 0.028<br>[0.027, 0.030] |
| Roof: asbestos sheets            | 0.958**<br>[0.921, 0.997]  | 1.027<br>[0.985, 1.070]    | 1.075**<br>[1.008, 1.145]  | 1.024*<br>[0.996, 1.052]   | 0.911*<br>[0.827, 1.003]  | 1.040<br>[0.969, 1.117]    | 1.062<br>[0.937, 1.204]    | 0.076<br>[0.073, 0.078] |
| Roof: roofing shingles           | 1.058**<br>[1.009, 1.109]  | 1.118***<br>[1.068, 1.171] | 1.186***<br>[1.108, 1.270] | 1.042**<br>[1.008, 1.076]  | 0.950<br>[0.841, 1.074]   | 1.018<br>[0.928, 1.118]    | 1.206**<br>[1.023, 1.422]  | 0.020<br>[0.019, 0.021] |
| Roof: tiles                      | 1.032*<br>[0.995, 1.070]   | 1.070***<br>[1.031, 1.110] | 1.106***<br>[1.050, 1.165] | 1.007<br>[0.981, 1.033]    | 0.908**<br>[0.825, 0.999] | 1.093**<br>[1.019, 1.173]  | 1.011<br>[0.896, 1.140]    | 0.071<br>[0.068, 0.073] |
| Roof: slate                      | 1.053***<br>[1.021, 1.085] | 1.042**<br>[1.009, 1.077]  | 1.016<br>[0.969, 1.066]    | 1.038***<br>[1.013, 1.063] | 0.932*<br>[0.863, 1.008]  | 1.114***<br>[1.053, 1.178] | 1.198***<br>[1.080, 1.329] | 0.081<br>[0.079, 0.084] |
| Roof: burnt brick                | 1.063***<br>[1.030, 1.096] | 1.021<br>[0.987, 1.057]    | 0.960<br>[0.909, 1.015]    | 0.938***<br>[0.913, 0.963] | 0.990<br>[0.913, 1.074]   | 0.966<br>[0.901, 1.036]    | 1.224***<br>[1.103, 1.357] | 0.045<br>[0.043, 0.047] |
| Roof: thatch/palm leaf           | 0.980<br>[0.945, 1.017]    | 0.958**<br>[0.921, 0.997]  | 0.919***<br>[0.862, 0.980] | 0.987<br>[0.959, 1.016]    | 1.020<br>[0.922, 1.128]   | 1.097**<br>[1.011, 1.189]  | 1.077<br>[0.952, 1.219]    | 0.045<br>[0.043, 0.046] |
| Roof: other                      | 1.023<br>[0.982, 1.066]    | 0.986<br>[0.945, 1.030]    | 0.943*<br>[0.880, 1.011]   | 1.034**<br>[1.002, 1.067]  | 1.101*<br>[0.998, 1.215]  | 1.087*<br>[0.992, 1.191]   | 1.368***<br>[1.217, 1.538] | 0.029<br>[0.027, 0.031] |
| Roof: mud                        | 1.071*<br>[0.998, 1.150]   | 1.014<br>[0.937, 1.098]    | 0.956<br>[0.835, 1.095]    | 0.997<br>[0.944, 1.053]    | 1.039<br>[0.870, 1.242]   | 1.132<br>[0.975, 1.314]    | 1.196<br>[0.929, 1.540]    | 0.009<br>[0.008, 0.009] |
| Roof: sod/mud and grass mixture  | 1.099***<br>[1.036, 1.167] | 1.011<br>[0.945, 1.083]    | 0.955<br>[0.860, 1.062]    | 1.014<br>[0.968, 1.063]    | 1.067<br>[0.915, 1.246]   | 1.169**<br>[1.008, 1.356]  | 1.032<br>[0.823, 1.294]    | 0.009<br>[0.009, 0.010] |
| Roof: plastic/polythene sheeting | 1.085**<br>[1.013, 1.162]  | 1.070*<br>[0.990, 1.157]   | 1.169***<br>[1.040, 1.315] | 1.084***<br>[1.032, 1.138] | 1.015<br>[0.825, 1.247]   | 1.131<br>[0.961, 1.330]    | 1.149<br>[0.912, 1.448]    | 0.008<br>[0.007, 0.008] |
| Roof: rustic mat                 | 0.957<br>[0.820, 1.117]    | 0.940<br>[0.761, 1.162]    | 1.091<br>[0.826, 1.440]    | 0.943<br>[0.840, 1.060]    | 1.225<br>[0.792, 1.897]   | 1.124<br>[0.796, 1.586]    | 0.817<br>[0.442, 1.511]    | 0.001<br>[0.001, 0.001] |
| Roof: palm/bamboo                | 1.023<br>[0.954, 1.096]    | 1.000<br>[0.927, 1.079]    | 0.983<br>[0.875, 1.104]    | 1.021<br>[0.973, 1.071]    | 1.243**<br>[1.039, 1.487] | 1.057<br>[0.891, 1.254]    | 1.276**<br>[1.020, 1.596]  | 0.007<br>[0.007, 0.008] |
| Roof: raw wood planks/timber     | 1.033<br>[0.952, 1.121]    | 1.018<br>[0.931, 1.114]    | 1.095<br>[0.961, 1.247]    | 1.089***<br>[1.037, 1.144] | 1.100<br>[0.894, 1.354]   | 0.999<br>[0.850, 1.174]    | 1.017<br>[0.763, 1.356]    | 0.006<br>[0.006, 0.007] |

|                                |                            |                            |                            |                            |                            |                            |                           |                         |
|--------------------------------|----------------------------|----------------------------|----------------------------|----------------------------|----------------------------|----------------------------|---------------------------|-------------------------|
| Roof: unburnt bricks           | 1.067<br>[0.969, 1.176]    | 1.053<br>[0.944, 1.174]    | 1.043<br>[0.901, 1.208]    | 1.028<br>[0.952, 1.111]    | 1.061<br>[0.830, 1.357]    | 1.225**<br>[1.018, 1.474]  | 1.212<br>[0.871, 1.685]   | 0.005<br>[0.005, 0.005] |
| Wall: cement/concrete          | RC                         | RC                         | RC                         | RC                         | RC                         | RC                         | RC                        | 0.379<br>[0.373, 0.385] |
| Wall: no walls                 | 1.051<br>[0.945, 1.170]    | 1.074<br>[0.956, 1.207]    | 1.035<br>[0.839, 1.278]    | 0.925*<br>[0.843, 1.014]   | 0.855<br>[0.620, 1.180]    | 0.821<br>[0.582, 1.158]    | 0.770<br>[0.468, 1.267]   | 0.003<br>[0.003, 0.004] |
| Wall: raw/reused wood          | 1.081<br>[0.931, 1.255]    | 0.890<br>[0.734, 1.079]    | 0.883<br>[0.705, 1.107]    | 0.982<br>[0.895, 1.078]    | 0.979<br>[0.717, 1.338]    | 0.993<br>[0.766, 1.287]    | 0.837<br>[0.507, 1.382]   | 0.003<br>[0.002, 0.003] |
| Wall: stone with lime/cement   | 1.031<br>[0.987, 1.078]    | 1.036<br>[0.991, 1.083]    | 1.126***<br>[1.057, 1.200] | 1.003<br>[0.972, 1.034]    | 0.845***<br>[0.755, 0.946] | 1.117***<br>[1.043, 1.196] | 0.930<br>[0.813, 1.065]   | 0.059<br>[0.057, 0.061] |
| Wall: burnt bricks             | 1.046***<br>[1.019, 1.074] | 1.041***<br>[1.012, 1.071] | 1.052**<br>[1.010, 1.096]  | 1.053***<br>[1.034, 1.072] | 1.003<br>[0.947, 1.062]    | 1.030<br>[0.986, 1.076]    | 1.015<br>[0.935, 1.103]   | 0.252<br>[0.247, 0.257] |
| Wall: cement blocks            | 1.017<br>[0.967, 1.070]    | 1.040<br>[0.990, 1.093]    | 1.066*<br>[0.993, 1.143]   | 1.027<br>[0.991, 1.064]    | 1.027<br>[0.924, 1.141]    | 1.067*<br>[0.992, 1.148]   | 1.008<br>[0.869, 1.169]   | 0.058<br>[0.055, 0.060] |
| Wall: wood planks/shingles     | 0.951<br>[0.823, 1.100]    | 0.841*<br>[0.698, 1.012]   | 0.779*<br>[0.595, 1.021]   | 0.999<br>[0.893, 1.117]    | 1.179<br>[0.857, 1.622]    | 0.980<br>[0.737, 1.304]    | 1.021<br>[0.629, 1.657]   | 0.002<br>[0.002, 0.002] |
| Wall: GI/metal/asbestos sheets | 1.020<br>[0.930, 1.119]    | 0.865***<br>[0.780, 0.959] | 0.977<br>[0.839, 1.138]    | 1.029<br>[0.958, 1.106]    | 0.891<br>[0.701, 1.133]    | 0.916<br>[0.770, 1.091]    | 1.174<br>[0.855, 1.611]   | 0.010<br>[0.009, 0.011] |
| Wall: other                    | 0.891<br>[0.769, 1.031]    | 1.005<br>[0.874, 1.156]    | 1.145<br>[0.936, 1.401]    | 0.971<br>[0.817, 1.153]    | 1.273<br>[0.897, 1.808]    | 0.947<br>[0.724, 1.237]    | 0.618*<br>[0.355, 1.074]  | 0.002<br>[0.002, 0.002] |
| Wall: cane/palm/trunks         | 0.947*<br>[0.892, 1.006]   | 0.955<br>[0.895, 1.019]    | 1.077<br>[0.971, 1.194]    | 0.994<br>[0.950, 1.039]    | 0.922<br>[0.783, 1.087]    | 0.897<br>[0.781, 1.030]    | 0.943<br>[0.771, 1.154]   | 0.016<br>[0.015, 0.017] |
| Wall: mud                      | 0.965**<br>[0.936, 0.996]  | 1.041**<br>[1.008, 1.076]  | 1.182***<br>[1.125, 1.242] | 1.047***<br>[1.023, 1.071] | 0.864***<br>[0.799, 0.935] | 0.988<br>[0.932, 1.047]    | 1.017<br>[0.914, 1.131]   | 0.136<br>[0.132, 0.139] |
| Wall: grass/reeds/thatch       | 1.047<br>[0.985, 1.114]    | 1.039<br>[0.969, 1.114]    | 1.002<br>[0.887, 1.131]    | 0.994<br>[0.945, 1.046]    | 1.046<br>[0.883, 1.238]    | 0.962<br>[0.817, 1.132]    | 0.956<br>[0.768, 1.189]   | 0.009<br>[0.008, 0.009] |
| Wall: bamboo with mud          | 0.998<br>[0.957, 1.040]    | 1.013<br>[0.968, 1.061]    | 1.054<br>[0.978, 1.135]    | 0.982<br>[0.950, 1.015]    | 0.943<br>[0.832, 1.068]    | 0.852***<br>[0.777, 0.934] | 1.016<br>[0.881, 1.172]   | 0.028<br>[0.027, 0.029] |
| Wall: stone with mud           | 1.040<br>[0.989, 1.094]    | 1.067**<br>[1.011, 1.125]  | 1.224***<br>[1.127, 1.329] | 1.023<br>[0.987, 1.060]    | 0.887*<br>[0.771, 1.020]   | 1.026<br>[0.934, 1.127]    | 1.055<br>[0.889, 1.252]   | 0.021<br>[0.020, 0.022] |
| Wall: plywood                  | 1.105<br>[0.858, 1.423]    | 0.828<br>[0.595, 1.153]    | 0.921<br>[0.607, 1.397]    | 1.069<br>[0.854, 1.339]    | 1.176<br>[0.718, 1.926]    | 0.807<br>[0.480, 1.356]    | 0.374**<br>[0.144, 0.966] | 0.001<br>[0.001, 0.001] |
| Wall: cardboard                | 1.089<br>[0.903, 1.313]    | 1.006<br>[0.764, 1.324]    | 0.995<br>[0.614, 1.612]    | 0.975<br>[0.816, 1.165]    | 0.957<br>[0.438, 2.091]    | 1.161<br>[0.837, 1.611]    | 0.694<br>[0.260, 1.854]   | 0.001<br>[0.001, 0.001] |
| Wall: unburnt brick            | 1.061**<br>[1.011, 1.114]  | 1.059**<br>[1.006, 1.114]  | 1.082*<br>[0.998, 1.173]   | 1.069***<br>[1.032, 1.108] | 0.926<br>[0.815, 1.052]    | 1.056<br>[0.960, 1.162]    | 1.132<br>[0.896, 1.429]   | 0.021<br>[0.020, 0.022] |

**e) Other**

|                                       |                            |                            |                            |                            |                            |                            |                            |                         |
|---------------------------------------|----------------------------|----------------------------|----------------------------|----------------------------|----------------------------|----------------------------|----------------------------|-------------------------|
| Staff                                 | 0.832<br>[0.631, 1.098]    | 0.776*<br>[0.582, 1.034]   | 0.766<br>[0.546, 1.073]    | 1.029<br>[0.901, 1.175]    | 1.223<br>[0.820, 1.826]    | 0.804<br>[0.567, 1.139]    | 1.458*<br>[0.932, 2.279]   | 0.002<br>[0.001, 0.002] |
| Bank account                          | 0.973**<br>[0.953, 0.995]  | 0.994<br>[0.971, 1.017]    | 0.987<br>[0.950, 1.026]    | 0.968***<br>[0.951, 0.984] | 1.071**<br>[1.006, 1.140]  | 0.951**<br>[0.906, 0.998]  | 1.063<br>[0.983, 1.150]    | 0.895<br>[0.893, 0.897] |
| Electricity                           | 0.966***<br>[0.944, 0.988] | 0.972**<br>[0.947, 0.996]  | 1.003<br>[0.962, 1.046]    | 0.993<br>[0.975, 1.011]    | 0.900***<br>[0.841, 0.963] | 0.995<br>[0.940, 1.052]    | 0.909**<br>[0.843, 0.980]  | 0.882<br>[0.879, 0.885] |
| Animal-drawn cart                     | 1.010<br>[0.975, 1.047]    | 1.065***<br>[1.025, 1.107] | 1.070**<br>[1.015, 1.128]  | 1.041***<br>[1.016, 1.067] | 0.974<br>[0.889, 1.068]    | 0.983<br>[0.920, 1.049]    | 0.977<br>[0.870, 1.097]    | 0.036<br>[0.035, 0.037] |
| Land usable for agriculture           | 1.001<br>[0.985, 1.018]    | 0.974***<br>[0.956, 0.991] | 0.965**<br>[0.939, 0.992]  | 0.991<br>[0.979, 1.004]    | 1.032<br>[0.989, 1.077]    | 1.000<br>[0.967, 1.033]    | 1.002<br>[0.947, 1.060]    | 0.389<br>[0.384, 0.394] |
| Internet                              | 1.030<br>[0.983, 1.080]    | 0.964<br>[0.915, 1.015]    | 0.913***<br>[0.852, 0.978] | 0.977<br>[0.947, 1.008]    | 1.055<br>[0.966, 1.153]    | 0.983<br>[0.916, 1.055]    | 0.960<br>[0.836, 1.102]    | 0.109<br>[0.106, 0.112] |
| Thresher                              | 0.991<br>[0.923, 1.064]    | 1.057<br>[0.978, 1.143]    | 1.163***<br>[1.043, 1.297] | 0.994<br>[0.950, 1.040]    | 1.077<br>[0.924, 1.256]    | 1.019<br>[0.897, 1.158]    | 0.983<br>[0.767, 1.259]    | 0.015<br>[0.014, 0.015] |
| Tractor                               | 1.013<br>[0.962, 1.065]    | 0.990<br>[0.935, 1.048]    | 0.945<br>[0.869, 1.027]    | 1.050***<br>[1.017, 1.083] | 1.063<br>[0.956, 1.183]    | 1.034<br>[0.941, 1.135]    | 1.001<br>[0.849, 1.181]    | 0.025<br>[0.024, 0.025] |
| Household member owns a house         | 1.039***<br>[1.015, 1.063] | 1.041***<br>[1.018, 1.066] | 1.025<br>[0.990, 1.062]    | 1.010<br>[0.994, 1.026]    | 0.977<br>[0.924, 1.033]    | 0.986<br>[0.945, 1.029]    | 1.089**<br>[1.009, 1.176]  | 0.798<br>[0.794, 0.803] |
| <b>Covariates</b>                     |                            |                            |                            |                            |                            |                            |                            |                         |
| Birth interval (months)               | 0.997***<br>[0.997, 0.998] | 0.997***<br>[0.997, 0.998] | 0.999**<br>[0.998, 1.000]  | 0.999***<br>[0.999, 0.999] | 0.999<br>[0.998, 1.001]    | 0.999<br>[0.998, 1.000]    | 0.994***<br>[0.992, 0.997] |                         |
| Birth order                           | 1.049***<br>[1.032, 1.067] | 1.094***<br>[1.075, 1.114] | 1.123***<br>[1.087, 1.161] | 0.981***<br>[0.968, 0.995] | 1.637***<br>[1.547, 1.734] | 0.958**<br>[0.923, 0.995]  | 0.396***<br>[0.371, 0.423] |                         |
| Age (months)                          | 1.007***<br>[1.007, 1.008] | 1.007***<br>[1.006, 1.007] | 0.991***<br>[0.990, 0.992] | 0.989***<br>[0.988, 0.989] | 0.981***<br>[0.980, 0.982] | 0.999***<br>[0.998, 1.000] | 0.981***<br>[0.979, 0.983] |                         |
| Female                                | 0.969***<br>[0.955, 0.983] | 0.973***<br>[0.958, 0.988] | 0.918***<br>[0.895, 0.941] | 1.001<br>[0.990, 1.011]    | 0.950***<br>[0.917, 0.984] | 1.120***<br>[1.090, 1.152] | 0.812***<br>[0.771, 0.856] |                         |
| First born                            | 0.848***<br>[0.825, 0.872] | 0.888***<br>[0.862, 0.915] | 0.985<br>[0.942, 1.030]    | 0.942***<br>[0.923, 0.962] | 1.022<br>[0.957, 1.092]    | 1.113***<br>[1.054, 1.176] | 0.981<br>[0.883, 1.089]    |                         |
| Delivered at home                     | 1.029***<br>[1.012, 1.046] | 1.049***<br>[1.030, 1.068] | 1.017<br>[0.987, 1.048]    | 1.011<br>[0.997, 1.024]    | 1.030<br>[0.984, 1.079]    | 1.139***<br>[1.078, 1.203] | 1.136***<br>[1.073, 1.203] |                         |
| Mother's age at birth (years)         | 0.962***<br>[0.951, 0.972] | 0.966***<br>[0.955, 0.978] | 0.992<br>[0.973, 1.011]    | 0.993<br>[0.985, 1.002]    | 0.984<br>[0.954, 1.015]    | 0.952***<br>[0.929, 0.976] | 0.911***<br>[0.879, 0.944] |                         |
| Mother's age at birth (years) squared | 1.001***<br>[1.000, 1.001] | 1.000***<br>[1.000, 1.001] | 1.000<br>[1.000, 1.001]    | 1.000<br>[1.000, 1.000]    | 1.000<br>[1.000, 1.001]    | 1.001***<br>[1.001, 1.001] | 1.002***<br>[1.001, 1.002] |                         |

|                                   |                            |                            |                            |                            |                            |                            |                            |
|-----------------------------------|----------------------------|----------------------------|----------------------------|----------------------------|----------------------------|----------------------------|----------------------------|
| Maternal height (z-score)         | 0.807***<br>[0.799, 0.814] | 0.817***<br>[0.810, 0.825] | 0.967***<br>[0.954, 0.979] | 0.992***<br>[0.986, 0.998] | 1.014<br>[0.994, 1.034]    | 0.884***<br>[0.869, 0.898] | 0.911***<br>[0.887, 0.936] |
| Received no vaccination           | 0.975*<br>[0.949, 1.002]   | 0.964**<br>[0.936, 0.992]  | 1.008<br>[0.962, 1.057]    | 1.012<br>[0.990, 1.035]    | 0.925**<br>[0.856, 0.999]  |                            |                            |
| Siblings ever born                | 0.974***<br>[0.959, 0.990] | 0.933***<br>[0.918, 0.949] | 0.890***<br>[0.862, 0.918] | 1.029***<br>[1.016, 1.042] | 0.620***<br>[0.587, 0.654] | 1.011<br>[0.976, 1.046]    | 3.040***<br>[2.866, 3.225] |
| Mother's education: none          | RC                         |
| Mother's education: primary       | 0.950***<br>[0.930, 0.971] | 0.942***<br>[0.919, 0.964] | 0.945***<br>[0.909, 0.983] | 0.953***<br>[0.938, 0.968] | 1.104***<br>[1.041, 1.170] | 1.000<br>[0.955, 1.048]    | 1.087**<br>[1.010, 1.170]  |
| Mother's education: secondary     | 0.857***<br>[0.840, 0.875] | 0.874***<br>[0.855, 0.893] | 0.962**<br>[0.931, 0.995]  | 0.901***<br>[0.888, 0.915] | 1.004<br>[0.954, 1.058]    | 0.912***<br>[0.876, 0.950] | 0.901***<br>[0.839, 0.967] |
| Mother's education: higher        | 0.709***<br>[0.674, 0.746] | 0.711***<br>[0.674, 0.750] | 0.891***<br>[0.839, 0.946] | 0.839***<br>[0.814, 0.864] | 0.935<br>[0.852, 1.027]    | 0.771***<br>[0.717, 0.828] | 0.780***<br>[0.670, 0.907] |
| Wealth quintile: first            | RC                         |
| Wealth quintile: second           | 1.024<br>[0.993, 1.056]    | 0.974<br>[0.942, 1.008]    | 0.955*<br>[0.906, 1.005]   | 1.016<br>[0.993, 1.040]    | 1.069<br>[0.982, 1.163]    | 1.087**<br>[1.015, 1.165]  | 1.138**<br>[1.021, 1.269]  |
| Wealth quintile: third            | 1.009<br>[0.955, 1.065]    | 0.918***<br>[0.866, 0.974] | 0.943<br>[0.864, 1.029]    | 1.050**<br>[1.009, 1.093]  | 1.068<br>[0.929, 1.226]    | 1.164***<br>[1.042, 1.301] | 1.269**<br>[1.056, 1.525]  |
| Wealth quintile: fourth           | 0.956<br>[0.883, 1.035]    | 0.902**<br>[0.827, 0.984]  | 0.980<br>[0.865, 1.110]    | 1.027<br>[0.970, 1.088]    | 0.998<br>[0.823, 1.211]    | 1.253***<br>[1.072, 1.465] | 1.291*<br>[0.993, 1.680]   |
| Wealth quintile: fifth            | 0.882**<br>[0.788, 0.988]  | 0.859**<br>[0.760, 0.971]  | 1.045<br>[0.883, 1.237]    | 1.054<br>[0.975, 1.140]    | 0.935<br>[0.726, 1.203]    | 1.219*<br>[0.992, 1.496]   | 1.377*<br>[0.965, 1.964]   |
| Caste/tribe: schedule caste       | RC                         |
| Caste/tribe: schedule tribe       | 1.000<br>[0.974, 1.028]    | 1.092***<br>[1.061, 1.124] | 1.161***<br>[1.111, 1.213] | 1.053***<br>[1.031, 1.075] | 0.891***<br>[0.824, 0.962] | 1.031<br>[0.975, 1.092]    | 0.857***<br>[0.786, 0.936] |
| Caste/tribe: other backward class | 0.979**<br>[0.960, 0.999]  | 0.989<br>[0.968, 1.011]    | 1.009<br>[0.977, 1.042]    | 0.980**<br>[0.965, 0.995]  | 0.994<br>[0.944, 1.047]    | 0.963*<br>[0.925, 1.002]   | 0.948*<br>[0.889, 1.010]   |
| Caste/tribe: none of them         | 0.910***<br>[0.884, 0.937] | 0.936***<br>[0.907, 0.966] | 0.981<br>[0.938, 1.027]    | 0.962***<br>[0.942, 0.983] | 0.984<br>[0.920, 1.053]    | 0.975<br>[0.925, 1.028]    | 0.907**<br>[0.827, 0.994]  |
| Caste/tribe: don't know           | 0.916<br>[0.812, 1.034]    | 0.920<br>[0.796, 1.063]    | 0.951<br>[0.794, 1.140]    | 0.999<br>[0.931, 1.071]    | 0.970<br>[0.768, 1.226]    | 1.177<br>[0.962, 1.440]    | 0.851<br>[0.627, 1.156]    |
| Singleton birth                   | RC                         |

|                              |                            |                            |                            |                         |                         |                            |                            |         |
|------------------------------|----------------------------|----------------------------|----------------------------|-------------------------|-------------------------|----------------------------|----------------------------|---------|
| First born twin/triplet etc. | 1.156***<br>[1.072, 1.246] | 1.335***<br>[1.239, 1.439] | 1.283***<br>[1.134, 1.452] | 1.004<br>[0.949, 1.064] | 1.085<br>[0.847, 1.389] | 3.746***<br>[3.499, 4.010] | 1.080<br>[0.935, 1.246]    |         |
| Later born twin/triplet etc. | 1.129***<br>[1.040, 1.225] | 1.294***<br>[1.200, 1.396] | 1.217***<br>[1.069, 1.386] | 1.033<br>[0.975, 1.094] | 0.958<br>[0.768, 1.194] | 4.154***<br>[3.878, 4.450] | 4.434***<br>[3.832, 5.130] |         |
| Observations                 | 204,238                    | 204,238                    | 204,238                    | 191,324                 | 221,553                 | 172,831                    | 232,570                    | 601,509 |

Notes: \*\*\* p<0.01, \*\* p<0.05, \* p<0.1. Prevalence ratios are shown. All estimates were weighted and tests for statistical significance and 95% confidence intervals (shown in brackets) were calculated using robust standard errors. All estimates in each column were obtained from a single model. Control variables: sex, age, maternal age at birth, birth order, birth interval, firstborn, twin, vaccination status (except for mortality and low birth weight), born at home, maternal education, caste/tribe, and wealth index quintiles. Proportions are for all households interviewed. Acronyms and abbreviations: liquefied petroleum gas (LPG), reinforced cement concrete (RCC), reinforced brick concrete (RBC), galvanized iron (GI), granite (grani.), shared (sh.), sewer system (sewer s.), without (w/o), with(w/), reverse osmosis (RO), reference category (RC).

Table A5. Results from conditional logit regressions.

|                                       | <u>Stunting</u>            | <u>Underweight</u>         | <u>Wasting</u>             | <u>Anemia</u>              | <u>Diarrhea</u>            | <u>Low birth weight</u>    | <u>Mortality</u>           | <u>Proportion (households)</u> |
|---------------------------------------|----------------------------|----------------------------|----------------------------|----------------------------|----------------------------|----------------------------|----------------------------|--------------------------------|
| <b>a) Water and toilet facilities</b> |                            |                            |                            |                            |                            |                            |                            |                                |
| Water pump                            | 0.952**<br>[0.916, 0.990]  | 0.986<br>[0.947, 1.025]    | 1.015<br>[0.971, 1.062]    | 1.027<br>[0.987, 1.069]    | 0.959<br>[0.904, 1.017]    | 0.912***<br>[0.868, 0.959] | 0.970<br>[0.886, 1.061]    | 0.172<br>[0.169, 0.176]        |
| Toilet: no facility/bush/field        | RC                         | 0.389<br>[0.383, 0.395]        |
| Toilet: flush to piped sewer system   | 0.862***<br>[0.790, 0.940] | 0.966<br>[0.884, 1.056]    | 1.004<br>[0.911, 1.106]    | 0.985<br>[0.903, 1.075]    | 0.962<br>[0.842, 1.100]    | 0.883**<br>[0.796, 0.978]  | 0.603***<br>[0.477, 0.762] | 0.078<br>[0.074, 0.083]        |
| Toilet: composting toilet             | 0.975<br>[0.690, 1.378]    | 1.029<br>[0.726, 1.458]    | 1.163<br>[0.791, 1.710]    | 1.011<br>[0.707, 1.446]    | 1.351<br>[0.775, 2.356]    | 0.729<br>[0.432, 1.229]    | 0.416<br>[0.142, 1.219]    | 0.001<br>[0.001, 0.001]        |
| Toilet: dry toilet                    | 0.721***<br>[0.572, 0.909] | 0.775**<br>[0.613, 0.979]  | 0.873<br>[0.658, 1.157]    | 0.756**<br>[0.603, 0.946]  | 0.862<br>[0.599, 1.241]    | 1.818***<br>[1.330, 2.485] | 1.274<br>[0.821, 1.977]    | 0.004<br>[0.003, 0.004]        |
| Toilet: other                         | 0.771<br>[0.474, 1.255]    | 0.858<br>[0.540, 1.364]    | 0.743<br>[0.430, 1.285]    | 1.311<br>[0.783, 2.197]    | 0.462**<br>[0.226, 0.945]  | 0.620<br>[0.308, 1.248]    | 0.115*<br>[0.013, 1.052]   | 0.001<br>[0.001, 0.001]        |
| Toilet: sh. Flush to piped sewer s.   | 1.201**<br>[1.041, 1.385]  | 0.999<br>[0.866, 1.152]    | 0.856*<br>[0.726, 1.009]   | 1.046<br>[0.904, 1.210]    | 0.869<br>[0.699, 1.081]    | 0.882<br>[0.744, 1.045]    | 0.847<br>[0.605, 1.184]    | 0.012<br>[0.010, 0.013]        |
| Toilet: shared flush to septic tank   | 0.892***<br>[0.839, 0.948] | 0.904***<br>[0.850, 0.962] | 0.972<br>[0.905, 1.045]    | 0.972<br>[0.911, 1.036]    | 1.104**<br>[1.007, 1.209]  | 1.074*<br>[0.992, 1.164]   | 0.993<br>[0.862, 1.143]    | 0.054<br>[0.052, 0.057]        |
| Toilet: shared flush to pit latrine   | 0.892**<br>[0.808, 0.986]  | 0.925<br>[0.834, 1.025]    | 0.939<br>[0.832, 1.060]    | 0.946<br>[0.850, 1.051]    | 1.092<br>[0.934, 1.276]    | 0.825***<br>[0.721, 0.943] | 1.045<br>[0.835, 1.308]    | 0.014<br>[0.013, 0.015]        |
| Toilet: sh. Flush to somewhere else   | 0.371***<br>[0.287, 0.479] | 0.710***<br>[0.557, 0.904] | 1.647***<br>[1.242, 2.184] | 1.090<br>[0.845, 1.407]    | 1.535**<br>[1.061, 2.221]  | 2.023***<br>[1.554, 2.633] | 2.427***<br>[1.350, 4.361] | 0.004<br>[0.003, 0.005]        |
| Toilet: sh. Flush don't know where    | 1.136<br>[0.675, 1.911]    | 1.226<br>[0.742, 2.027]    | 2.059**<br>[1.107, 3.830]  | 1.515<br>[0.829, 2.769]    | 0.164**<br>[0.039, 0.687]  | 1.020<br>[0.507, 2.051]    | 1.872<br>[0.525, 6.678]    | 0.000<br>[0.000, 0.000]        |
| Toilet: sh. Ventilated improved pit   | 0.713*<br>[0.501, 1.016]   | 0.579***<br>[0.401, 0.835] | 0.628**<br>[0.418, 0.944]  | 1.180<br>[0.829, 1.679]    | 0.814<br>[0.478, 1.385]    | 1.544**<br>[1.026, 2.326]  | 1.054<br>[0.385, 2.887]    | 0.001<br>[0.001, 0.002]        |
| Toilet: shared pit latrine w/ slab    | 0.892*<br>[0.788, 1.009]   | 1.125*<br>[0.993, 1.276]   | 1.011<br>[0.871, 1.174]    | 0.990<br>[0.868, 1.128]    | 1.082<br>[0.868, 1.349]    | 0.971<br>[0.825, 1.142]    | 0.911<br>[0.677, 1.226]    | 0.009<br>[0.009, 0.010]        |
| Toilet: flush to septic tank          | 0.903***<br>[0.864, 0.943] | 0.918***<br>[0.878, 0.960] | 0.996<br>[0.946, 1.049]    | 0.911***<br>[0.870, 0.954] | 0.971<br>[0.907, 1.040]    | 0.934**<br>[0.881, 0.990]  | 0.815***<br>[0.736, 0.903] | 0.287<br>[0.283, 0.292]        |
| Toilet: sh. Pit w/o slab/open pit     | 1.016<br>[0.813, 1.270]    | 1.185<br>[0.945, 1.486]    | 1.305**<br>[1.004, 1.696]  | 1.168<br>[0.924, 1.477]    | 1.910***<br>[1.320, 2.762] | 1.065<br>[0.778, 1.457]    | 0.751<br>[0.458, 1.233]    | 0.003<br>[0.003, 0.003]        |
| Toilet: shared composting toilet      | 0.748<br>[0.420, 1.329]    | 1.001<br>[0.573, 1.750]    | 0.354**<br>[0.153, 0.819]  | 0.468**<br>[0.257, 0.851]  | 0.231*<br>[0.046, 1.159]   | 0.272***<br>[0.129, 0.575] | 1.243<br>[0.297, 5.200]    | 0.000<br>[0.000, 0.001]        |
| Toilet: shared dry toilet             | 0.881                      | 1.129                      | 0.948                      | 1.133                      | 0.551*                     | 0.304***                   | 1.190                      | 0.001                          |

|                                   |                |                |                |                |                |                |                |                |
|-----------------------------------|----------------|----------------|----------------|----------------|----------------|----------------|----------------|----------------|
|                                   | [0.603, 1.287] | [0.754, 1.692] | [0.562, 1.599] | [0.761, 1.687] | [0.300, 1.014] | [0.166, 0.558] | [0.507, 2.792] | [0.001, 0.001] |
| Toilet: shared other              | 0.956          | 1.303          | 1.545**        | 1.501*         | 0.679          | 1.961***       | 1.529          | 0.002          |
|                                   | [0.634, 1.442] | [0.911, 1.863] | [1.068, 2.235] | [0.970, 2.323] | [0.347, 1.328] | [1.233, 3.120] | [0.651, 3.595] | [0.001, 0.002] |
| Toilet: flush to pit latrine      | 0.958          | 0.997          | 0.957          | 0.889***       | 1.003          | 0.912**        | 0.811***       | 0.072          |
|                                   | [0.903, 1.015] | [0.939, 1.058] | [0.894, 1.025] | [0.836, 0.945] | [0.915, 1.100] | [0.845, 0.985] | [0.707, 0.930] | [0.070, 0.074] |
| Toilet: flush to somewhere else   | 0.903          | 1.099          | 0.816**        | 1.111          | 0.692***       | 0.796**        | 1.011          | 0.009          |
|                                   | [0.766, 1.066] | [0.931, 1.298] | [0.675, 0.986] | [0.939, 1.314] | [0.526, 0.911] | [0.647, 0.978] | [0.682, 1.498] | [0.008, 0.010] |
| Toilet: flush don't know where    | 1.276          | 0.656*         | 0.978          | 1.309          | 1.715          | 1.017          | 0.591          | 0.001          |
|                                   | [0.836, 1.946] | [0.420, 1.025] | [0.575, 1.662] | [0.847, 2.022] | [0.893, 3.294] | [0.609, 1.697] | [0.206, 1.697] | [0.001, 0.001] |
| Toilet: ventilated improved pit   | 0.922          | 0.836*         | 0.717***       | 0.886          | 1.003          | 0.931          | 1.690***       | 0.006          |
|                                   | [0.765, 1.110] | [0.688, 1.017] | [0.570, 0.901] | [0.737, 1.064] | [0.760, 1.323] | [0.734, 1.182] | [1.153, 2.477] | [0.005, 0.006] |
| Toilet: pit latrine with slab     | 0.917**        | 0.873***       | 0.887***       | 0.883***       | 1.063          | 0.971          | 0.889          | 0.039          |
|                                   | [0.851, 0.989] | [0.808, 0.942] | [0.811, 0.969] | [0.817, 0.954] | [0.940, 1.202] | [0.881, 1.070] | [0.744, 1.062] | [0.038, 0.041] |
| Toilet: pit without slab/open pit | 0.928          | 0.950          | 1.087          | 0.861**        | 1.337***       | 0.963          | 0.831          | 0.011          |
|                                   | [0.822, 1.048] | [0.838, 1.078] | [0.939, 1.257] | [0.756, 0.980] | [1.084, 1.648] | [0.812, 1.142] | [0.628, 1.098] | [0.011, 0.012] |
| Water: tube well or borehole      | RC             | 0.392          |
|                                   |                |                |                |                |                |                |                | [0.386, 0.399] |
| Water: piped into dwelling        | 0.958          | 0.994          | 0.956          | 0.989          | 0.991          | 1.029          | 0.713***       | 0.166          |
|                                   | [0.904, 1.014] | [0.938, 1.054] | [0.896, 1.021] | [0.933, 1.049] | [0.907, 1.082] | [0.959, 1.104] | [0.619, 0.821] | [0.161, 0.171] |
| Water: rainwater                  | 1.363*         | 1.045          | 0.764          | 0.668**        | 1.170          | 0.946          | 0.875          | 0.002          |
|                                   | [0.971, 1.913] | [0.730, 1.496] | [0.500, 1.168] | [0.469, 0.950] | [0.646, 2.118] | [0.582, 1.535] | [0.374, 2.047] | [0.001, 0.002] |
| Water: tanker truck               | 1.109          | 0.899          | 0.963          | 0.891          | 1.175          | 0.892          | 0.907          | 0.013          |
|                                   | [0.973, 1.265] | [0.786, 1.029] | [0.825, 1.124] | [0.776, 1.024] | [0.943, 1.464] | [0.762, 1.044] | [0.665, 1.237] | [0.011, 0.016] |
| Water: cart with small tank       | 0.603***       | 0.935          | 1.336          | 0.570***       | 0.862          | 0.806          | 1.243          | 0.002          |
|                                   | [0.427, 0.851] | [0.666, 1.311] | [0.923, 1.934] | [0.409, 0.794] | [0.531, 1.399] | [0.548, 1.185] | [0.642, 2.407] | [0.001, 0.002] |
| Water: bottled water              | 0.980          | 0.878**        | 0.851**        | 0.931          | 1.183**        | 0.912          | 0.778*         | 0.031          |
|                                   | [0.880, 1.091] | [0.788, 0.980] | [0.753, 0.963] | [0.836, 1.036] | [1.008, 1.389] | [0.804, 1.035] | [0.587, 1.032] | [0.029, 0.033] |
| Water: community RO plant         | 0.918          | 0.755***       | 0.975          | 0.720***       | 1.374**        | 0.924          | 0.802          | 0.005          |
|                                   | [0.750, 1.124] | [0.615, 0.928] | [0.776, 1.225] | [0.586, 0.883] | [1.023, 1.845] | [0.719, 1.188] | [0.525, 1.225] | [0.005, 0.006] |
| Water: other                      | 0.953          | 0.866          | 0.797          | 1.122          | 1.798***       | 0.727          | 1.066          | 0.002          |
|                                   | [0.684, 1.328] | [0.622, 1.206] | [0.532, 1.192] | [0.811, 1.552] | [1.160, 2.785] | [0.476, 1.112] | [0.489, 2.323] | [0.001, 0.002] |
| Water: piped to yard/plot         | 1.044          | 1.001          | 0.919***       | 0.934**        | 1.032          | 1.022          | 0.855**        | 0.136          |
|                                   | [0.988, 1.104] | [0.947, 1.059] | [0.863, 0.978] | [0.882, 0.988] | [0.947, 1.124] | [0.954, 1.094] | [0.749, 0.976] | [0.132, 0.139] |
| Water: public tap/standpipe       | 1.050*         | 1.008          | 1.022          | 1.000          | 1.066          | 1.007          | 1.010          | 0.159          |
|                                   | [0.999, 1.104] | [0.959, 1.060] | [0.966, 1.082] | [0.949, 1.054] | [0.985, 1.153] | [0.945, 1.072] | [0.902, 1.131] | [0.155, 0.163] |
| Water: protected well             | 1.044          | 1.045          | 0.969          | 1.140***       | 1.032          | 1.192***       | 0.891          | 0.037          |

|                                        |                             |                             |                            |                            |                            |                            |                           |                         |
|----------------------------------------|-----------------------------|-----------------------------|----------------------------|----------------------------|----------------------------|----------------------------|---------------------------|-------------------------|
| Water: unprotected well                | [0.951, 1.146]<br>0.949     | [0.950, 1.148]<br>0.963     | [0.873, 1.076]<br>1.053    | [1.035, 1.256]<br>0.996    | [0.885, 1.205]<br>0.926    | [1.062, 1.338]<br>1.060    | [0.700, 1.135]<br>0.954   | [0.034, 0.039]<br>0.042 |
| Water: protected spring                | [0.889, 1.014]<br>0.835     | [0.902, 1.028]<br>0.901     | [0.979, 1.133]<br>1.077    | [0.928, 1.070]<br>0.994    | [0.830, 1.033]<br>1.165    | [0.970, 1.158]<br>1.086    | [0.826, 1.102]<br>0.609   | [0.041, 0.044]<br>0.003 |
| Water: unprotected spring              | [0.650, 1.073]<br>0.898     | [0.693, 1.170]<br>0.830*    | [0.808, 1.435]<br>0.840    | [0.771, 1.281]<br>0.910    | [0.801, 1.694]<br>0.862    | [0.792, 1.488]<br>1.207    | [0.322, 1.151]<br>0.969   | [0.003, 0.004]<br>0.004 |
| Water: river/dam/lake/ponds etc.       | [0.745, 1.082]<br>0.908     | [0.686, 1.005]<br>0.870     | [0.681, 1.036]<br>1.125    | [0.746, 1.110]<br>0.859*   | [0.629, 1.180]<br>1.057    | [0.949, 1.535]<br>1.016    | [0.607, 1.546]<br>0.942   | [0.004, 0.004]<br>0.007 |
|                                        | [0.769, 1.072]<br>0.931***  | [0.732, 1.034]<br>0.910***  | [0.929, 1.363]<br>0.926*** | [0.719, 1.026]<br>1.005    | [0.790, 1.414]<br>1.019    | [0.801, 1.289]<br>0.964    | [0.642, 1.381]<br>0.919   | [0.006, 0.007]<br>0.296 |
| <b>b) Food storage and preparation</b> |                             |                             |                            |                            |                            |                            |                           |                         |
| Refrigerator                           | [0.890, 0.975]<br>0.951***  | [0.869, 0.953]<br>0.921***  | [0.879, 0.976]<br>0.991    | [0.959, 1.052]<br>0.947*** | [0.950, 1.093]<br>1.057**  | [0.913, 1.018]<br>0.932*** | [0.820, 1.030]<br>0.981   | [0.291, 0.302]<br>0.566 |
| Pressure cooker                        | [0.918, 0.985]<br>RC        | [0.889, 0.954]<br>RC        | [0.951, 1.032]<br>RC       | [0.912, 0.983]<br>RC       | [1.001, 1.116]<br>RC       | [0.889, 0.977]<br>RC       | [0.906, 1.062]<br>RC      | [0.561, 0.572]<br>0.405 |
| Cooking: wood                          |                             |                             |                            |                            |                            |                            |                           | [0.399, 0.411]          |
| Cooking: electricity                   | 1.206*<br>[0.999, 1.456]    | 0.972<br>[0.801, 1.179]     | 1.055<br>[0.840, 1.324]    | 1.079<br>[0.891, 1.306]    | 0.907<br>[0.666, 1.235]    | 0.958<br>[0.757, 1.213]    | 1.653**<br>[1.069, 2.556] | 0.006<br>[0.006, 0.007] |
| Cooking: animal dung                   | 1.050**<br>[1.001, 1.101]   | 1.060**<br>[1.011, 1.112]   | 0.990<br>[0.935, 1.049]    | 1.040<br>[0.988, 1.095]    | 1.108***<br>[1.032, 1.189] | 1.031<br>[0.957, 1.111]    | 1.106**<br>[1.001, 1.222] | 0.072<br>[0.069, 0.074] |
| Cooking: no food cooked in house       | 7.032***<br>[2.628, 18.817] | 9.610***<br>[3.386, 27.272] | 3.396**<br>[1.252, 9.213]  | 3.544*<br>[0.882, 14.247]  | 0.988<br>[0.323, 3.028]    | 0.000<br>[0.000, .]        | 5.353*<br>[0.848, 33.787] | 0.003<br>[0.002, 0.003] |
| Cooking: other                         | 1.474<br>[0.750, 2.896]     | 1.138<br>[0.598, 2.163]     | 0.679<br>[0.310, 1.487]    | 1.172<br>[0.560, 2.455]    | 1.032<br>[0.377, 2.825]    | 1.039<br>[0.416, 2.595]    | 0.201<br>[0.015, 2.758]   | 0.000<br>[0.000, 0.001] |
| Cooking: LPG/natural gas               | 0.936***<br>[0.896, 0.979]  | 0.932***<br>[0.891, 0.976]  | 0.962<br>[0.913, 1.014]    | 1.008<br>[0.962, 1.055]    | 1.071**<br>[1.000, 1.147]  | 0.934**<br>[0.883, 0.988]  | 0.950<br>[0.854, 1.056]   | 0.423<br>[0.416, 0.430] |
| Cooking: biogas                        | 0.832**<br>[0.699, 0.991]   | 0.876<br>[0.734, 1.047]     | 0.778**<br>[0.635, 0.953]  | 1.403***<br>[1.181, 1.668] | 0.631***<br>[0.470, 0.848] | 1.003<br>[0.820, 1.227]    | 1.593**<br>[1.031, 2.461] | 0.008<br>[0.007, 0.009] |
| Cooking: kerosene                      | 0.985<br>[0.864, 1.122]     | 1.091<br>[0.956, 1.245]     | 1.147*<br>[0.990, 1.329]   | 0.984<br>[0.858, 1.128]    | 0.897<br>[0.725, 1.110]    | 1.263***<br>[1.078, 1.479] | 0.966<br>[0.681, 1.371]   | 0.012<br>[0.011, 0.013] |
| Cooking: coal, lignite                 | 1.040<br>[0.906, 1.194]     | 1.126*<br>[0.984, 1.289]    | 1.244***<br>[1.069, 1.448] | 0.871*<br>[0.754, 1.007]   | 1.109<br>[0.890, 1.381]    | 0.845*<br>[0.693, 1.029]   | 0.922<br>[0.668, 1.273]   | 0.009<br>[0.008, 0.010] |
| Cooking: charcoal                      | 0.964<br>[0.828, 1.124]     | 1.080<br>[0.926, 1.259]     | 0.879<br>[0.734, 1.053]    | 0.967<br>[0.817, 1.146]    | 1.027<br>[0.795, 1.326]    | 0.712***<br>[0.568, 0.892] | 1.500**<br>[1.047, 2.150] | 0.006<br>[0.005, 0.006] |
| Cooking: straw/shrubs/grass            | 1.076**<br>[1.002, 1.156]   | 1.062*<br>[0.989, 1.141]    | 1.027<br>[0.944, 1.118]    | 1.068*<br>[0.989, 1.153]   | 0.930<br>[0.834, 1.038]    | 1.183***<br>[1.060, 1.320] | 1.005<br>[0.860, 1.174]   | 0.025<br>[0.024, 0.027] |

|                                |                |                |                |                |                |                |                |                |
|--------------------------------|----------------|----------------|----------------|----------------|----------------|----------------|----------------|----------------|
| Cooking: agricultural crop     | 1.068*         | 1.133***       | 1.056          | 1.006          | 1.084          | 1.108*         | 1.025          | 0.030          |
|                                | [0.997, 1.144] | [1.057, 1.214] | [0.973, 1.145] | [0.935, 1.083] | [0.975, 1.206] | [0.996, 1.232] | [0.881, 1.193] | [0.028, 0.032] |
| <b>c) Other consumer goods</b> |                |                |                |                |                |                |                |                |
| Radio                          | 0.957*         | 1.007          | 1.019          | 1.053**        | 1.027          | 1.092***       | 0.954          | 0.081          |
|                                | [0.912, 1.003] | [0.960, 1.056] | [0.964, 1.076] | [1.003, 1.105] | [0.956, 1.104] | [1.027, 1.162] | [0.855, 1.064] | [0.080, 0.083] |
| Bicycle                        | 0.949***       | 0.963***       | 1.049***       | 0.970**        | 0.962*         | 0.982          | 1.013          | 0.521          |
|                                | [0.924, 0.974] | [0.938, 0.989] | [1.018, 1.082] | [0.943, 0.997] | [0.923, 1.003] | [0.948, 1.017] | [0.953, 1.077] | [0.516, 0.526] |
| Motorcycle/scooter             | 0.917***       | 0.925***       | 0.963**        | 0.977          | 0.923***       | 0.969          | 0.878***       | 0.377          |
|                                | [0.889, 0.946] | [0.896, 0.954] | [0.929, 0.999] | [0.946, 1.010] | [0.879, 0.969] | [0.931, 1.009] | [0.816, 0.944] | [0.372, 0.381] |
| Car/truck                      | 0.896***       | 0.861***       | 0.925*         | 0.974          | 0.945          | 1.060          | 1.014          | 0.060          |
|                                | [0.835, 0.962] | [0.800, 0.926] | [0.856, 1.000] | [0.911, 1.042] | [0.850, 1.051] | [0.977, 1.151] | [0.847, 1.215] | [0.058, 0.063] |
| Telephone (land-line)          | 0.906*         | 1.056          | 1.098*         | 0.974          | 0.946          | 1.042          | 0.950          | 0.039          |
|                                | [0.819, 1.002] | [0.956, 1.166] | [0.989, 1.220] | [0.886, 1.070] | [0.811, 1.104] | [0.931, 1.166] | [0.734, 1.229] | [0.037, 0.041] |
| Mobile telephone               | 0.937***       | 0.886***       | 0.887***       | 0.934***       | 1.016          | 0.878***       | 1.076          | 0.904          |
|                                | [0.895, 0.981] | [0.846, 0.927] | [0.842, 0.934] | [0.888, 0.982] | [0.944, 1.093] | [0.822, 0.937] | [0.977, 1.185] | [0.902, 0.906] |
| Watch                          | 0.977          | 1.019          | 1.025          | 0.949***       | 0.975          | 1.029          | 0.918**        | 0.781          |
|                                | [0.947, 1.008] | [0.988, 1.052] | [0.988, 1.063] | [0.917, 0.981] | [0.928, 1.023] | [0.984, 1.076] | [0.859, 0.982] | [0.778, 0.785] |
| Mattress                       | 0.972*         | 0.997          | 0.980          | 0.982          | 0.978          | 0.987          | 0.978          | 0.667          |
|                                | [0.941, 1.003] | [0.966, 1.029] | [0.944, 1.016] | [0.949, 1.016] | [0.930, 1.028] | [0.944, 1.031] | [0.911, 1.049] | [0.662, 0.672] |
| Chair                          | 0.972*         | 0.988          | 0.987          | 0.979          | 0.973          | 0.962*         | 0.953          | 0.762          |
|                                | [0.941, 1.004] | [0.957, 1.021] | [0.951, 1.025] | [0.945, 1.013] | [0.925, 1.023] | [0.920, 1.007] | [0.888, 1.023] | [0.758, 0.765] |
| Cot/bed                        | 1.038*         | 0.999          | 0.970          | 1.042*         | 0.925**        | 1.002          | 0.806***       | 0.884          |
|                                | [0.994, 1.085] | [0.957, 1.044] | [0.923, 1.020] | [0.996, 1.091] | [0.863, 0.992] | [0.946, 1.062] | [0.730, 0.891] | [0.881, 0.887] |
| Table                          | 1.016          | 1.008          | 0.961**        | 0.972*         | 0.886***       | 0.962*         | 1.007          | 0.554          |
|                                | [0.984, 1.048] | [0.976, 1.040] | [0.926, 0.997] | [0.940, 1.005] | [0.843, 0.931] | [0.922, 1.004] | [0.935, 1.084] | [0.550, 0.559] |
| Electric fan                   | 0.958**        | 0.969          | 0.948**        | 0.976          | 0.964          | 0.980          | 0.916*         | 0.782          |
|                                | [0.919, 0.999] | [0.929, 1.010] | [0.903, 0.995] | [0.932, 1.021] | [0.902, 1.030] | [0.922, 1.040] | [0.837, 1.003] | [0.777, 0.786] |
| Black and white television     | 0.960          | 0.929**        | 0.924**        | 0.960          | 1.060          | 1.120***       | 1.037          | 0.033          |
|                                | [0.902, 1.022] | [0.872, 0.989] | [0.858, 0.994] | [0.900, 1.024] | [0.966, 1.163] | [1.033, 1.215] | [0.903, 1.190] | [0.032, 0.034] |
| Color television               | 0.962**        | 0.968*         | 1.005          | 0.971          | 0.980          | 0.950**        | 0.946          | 0.635          |
|                                | [0.929, 0.996] | [0.935, 1.003] | [0.964, 1.046] | [0.935, 1.008] | [0.928, 1.035] | [0.906, 0.995] | [0.874, 1.024] | [0.630, 0.640] |
| Sewing machine                 | 0.948***       | 0.968*         | 0.998          | 0.978          | 1.026          | 0.973          | 0.883***       | 0.240          |
|                                | [0.917, 0.980] | [0.936, 1.001] | [0.960, 1.037] | [0.945, 1.012] | [0.975, 1.079] | [0.932, 1.015] | [0.816, 0.955] | [0.237, 0.243] |
| Computer                       | 1.033          | 0.946          | 1.033          | 0.884***       | 0.973          | 0.941          | 0.845*         | 0.090          |
|                                | [0.962, 1.110] | [0.879, 1.018] | [0.955, 1.119] | [0.825, 0.946] | [0.877, 1.079] | [0.865, 1.024] | [0.700, 1.020] | [0.087, 0.093] |
| Air conditioner/cooler         | 1.040*         | 1.055**        | 1.019          | 0.989          | 1.111***       | 0.972          | 0.907*         | 0.179          |

|                                     |                |                |                |                |                |                |                |                |
|-------------------------------------|----------------|----------------|----------------|----------------|----------------|----------------|----------------|----------------|
|                                     | [0.994, 1.089] | [1.008, 1.105] | [0.967, 1.073] | [0.944, 1.036] | [1.038, 1.189] | [0.919, 1.027] | [0.815, 1.011] | [0.175, 0.183] |
| Washing machine                     | 0.940**        | 0.984          | 0.907***       | 0.940**        | 1.047          | 0.958          | 0.857**        | 0.136          |
|                                     | [0.886, 0.997] | [0.927, 1.045] | [0.849, 0.968] | [0.888, 0.996] | [0.959, 1.143] | [0.894, 1.027] | [0.740, 0.993] | [0.132, 0.140] |
| <b>d) Housing quality</b>           |                |                |                |                |                |                |                |                |
| Residents per bedroom               | 1.017***       | 1.011***       | 0.994          | 0.998          | 0.999          | 1.001          | 0.700***       | 2.917          |
|                                     | [1.009, 1.025] | [1.003, 1.018] | [0.985, 1.003] | [0.990, 1.006] | [0.988, 1.011] | [0.991, 1.012] | [0.686, 0.713] | [2.905, 2.929] |
| Floor: cement                       | RC             | 0.393          |
|                                     |                |                |                |                |                |                |                | [0.388, 0.397] |
| Floor: mud/clay/earth               | 1.045**        | 1.011          | 0.990          | 1.009          | 1.015          | 1.034          | 1.099*         | 0.271          |
|                                     | [1.001, 1.091] | [0.968, 1.056] | [0.941, 1.041] | [0.964, 1.057] | [0.949, 1.086] | [0.975, 1.097] | [0.997, 1.212] | [0.266, 0.276] |
| Floor: ceramic tiles                | 1.103***       | 0.956          | 0.965          | 0.972          | 0.944          | 1.041          | 1.060          | 0.106          |
|                                     | [1.039, 1.171] | [0.900, 1.015] | [0.903, 1.030] | [0.917, 1.030] | [0.860, 1.036] | [0.973, 1.113] | [0.900, 1.250] | [0.102, 0.110] |
| Floor: carpet                       | 1.106          | 1.035          | 1.127          | 1.180*         | 0.975          | 1.280**        | 0.809          | 0.006          |
|                                     | [0.919, 1.330] | [0.859, 1.248] | [0.922, 1.378] | [0.976, 1.426] | [0.734, 1.295] | [1.028, 1.594] | [0.492, 1.330] | [0.005, 0.006] |
| Floor: polished stone/marble/grani. | 0.983          | 0.904***       | 0.965          | 0.908***       | 0.850***       | 0.937*         | 1.058          | 0.077          |
|                                     | [0.920, 1.049] | [0.846, 0.967] | [0.898, 1.038] | [0.852, 0.968] | [0.767, 0.942] | [0.869, 1.012] | [0.890, 1.257] | [0.074, 0.080] |
| Floor: other                        | 0.561**        | 0.591**        | 1.136          | 0.802          | 0.891          | 0.927          | 1.855          | 0.001          |
|                                     | [0.331, 0.951] | [0.355, 0.983] | [0.654, 1.971] | [0.475, 1.355] | [0.408, 1.947] | [0.474, 1.811] | [0.654, 5.257] | [0.001, 0.001] |
| Floor: sand                         | 1.095          | 1.176**        | 1.068          | 0.879*         | 1.482***       | 1.038          | 1.216          | 0.007          |
|                                     | [0.954, 1.255] | [1.025, 1.350] | [0.916, 1.245] | [0.759, 1.018] | [1.209, 1.816] | [0.864, 1.247] | [0.895, 1.651] | [0.007, 0.007] |
| Floor: dung                         | 1.055*         | 1.028          | 0.936**        | 1.051          | 0.982          | 1.016          | 1.096          | 0.070          |
|                                     | [0.996, 1.117] | [0.970, 1.088] | [0.875, 1.000] | [0.988, 1.119] | [0.900, 1.071] | [0.938, 1.100] | [0.970, 1.238] | [0.068, 0.072] |
| Floor: raw wood planks              | 0.890          | 0.939          | 0.999          | 0.653***       | 1.213          | 1.270          | 1.283          | 0.002          |
|                                     | [0.687, 1.154] | [0.712, 1.239] | [0.717, 1.393] | [0.494, 0.862] | [0.792, 1.859] | [0.885, 1.822] | [0.732, 2.249] | [0.002, 0.003] |
| Floor: palm/bamboo                  | 0.900          | 0.919          | 0.979          | 0.896          | 1.120          | 0.863          | 1.474          | 0.002          |
|                                     | [0.661, 1.227] | [0.670, 1.261] | [0.682, 1.405] | [0.655, 1.226] | [0.712, 1.763] | [0.567, 1.313] | [0.814, 2.669] | [0.002, 0.002] |
| Floor: brick                        | 1.033          | 1.110          | 1.072          | 0.933          | 1.136          | 0.937          | 1.183          | 0.008          |
|                                     | [0.903, 1.182] | [0.969, 1.272] | [0.918, 1.253] | [0.812, 1.073] | [0.935, 1.379] | [0.786, 1.118] | [0.873, 1.603] | [0.007, 0.008] |
| Floor: stone                        | 1.034          | 0.927**        | 0.907**        | 0.906***       | 0.782***       | 0.869***       | 1.129          | 0.055          |
|                                     | [0.963, 1.111] | [0.863, 0.996] | [0.836, 0.984] | [0.841, 0.975] | [0.694, 0.881] | [0.797, 0.947] | [0.949, 1.344] | [0.052, 0.057] |
| Floor: parquet/polished wood        | 1.136          | 0.935          | 1.417**        | 0.964          | 1.383          | 0.808          | 0.568          | 0.002          |
|                                     | [0.849, 1.521] | [0.691, 1.266] | [1.023, 1.962] | [0.712, 1.304] | [0.879, 2.177] | [0.548, 1.193] | [0.236, 1.366] | [0.002, 0.002] |
| Floor: vinyl/asphalt strips         | 1.623***       | 1.877***       | 2.012***       | 0.753          | 2.455***       | 0.867          | 0.556          | 0.002          |
|                                     | [1.136, 2.320] | [1.307, 2.696] | [1.381, 2.931] | [0.518, 1.094] | [1.448, 4.163] | [0.553, 1.359] | [0.184, 1.684] | [0.001, 0.002] |
| Roof: RCC/RBC/cement/concrete       | RC             | 0.413          |
|                                     |                |                |                |                |                |                |                | [0.408, 0.419] |

|                                  |                            |                           |                            |                            |                            |                            |                            |                         |
|----------------------------------|----------------------------|---------------------------|----------------------------|----------------------------|----------------------------|----------------------------|----------------------------|-------------------------|
| Roof: no roof                    | 1.124<br>[0.869, 1.455]    | 1.171<br>[0.906, 1.512]   | 1.076<br>[0.794, 1.458]    | 0.852<br>[0.653, 1.110]    | 0.934<br>[0.644, 1.356]    | 1.194<br>[0.846, 1.687]    | 1.058<br>[0.596, 1.877]    | 0.002<br>[0.002, 0.002] |
| Roof: loosely packed stone       | 1.096**<br>[1.003, 1.197]  | 1.093*<br>[1.000, 1.196]  | 1.021<br>[0.921, 1.133]    | 0.931<br>[0.848, 1.023]    | 0.937<br>[0.818, 1.074]    | 1.050<br>[0.934, 1.179]    | 1.076<br>[0.889, 1.301]    | 0.023<br>[0.022, 0.025] |
| Roof: metal/GI                   | 0.984<br>[0.928, 1.042]    | 1.028<br>[0.970, 1.090]   | 1.049<br>[0.982, 1.121]    | 1.041<br>[0.979, 1.106]    | 1.083*<br>[0.987, 1.188]   | 0.960<br>[0.891, 1.034]    | 1.094<br>[0.951, 1.258]    | 0.110<br>[0.106, 0.113] |
| Roof: wood                       | 0.995<br>[0.889, 1.114]    | 1.115*<br>[0.996, 1.249]  | 0.929<br>[0.815, 1.058]    | 0.870**<br>[0.772, 0.980]  | 0.991<br>[0.837, 1.174]    | 1.067<br>[0.922, 1.234]    | 1.379***<br>[1.090, 1.746] | 0.012<br>[0.011, 0.012] |
| Roof: calamine/cement fiber      | 1.097**<br>[1.015, 1.185]  | 1.053<br>[0.975, 1.137]   | 1.022<br>[0.936, 1.116]    | 1.136***<br>[1.048, 1.232] | 1.033<br>[0.919, 1.160]    | 1.147***<br>[1.038, 1.269] | 1.062<br>[0.884, 1.277]    | 0.028<br>[0.027, 0.030] |
| Roof: asbestos sheets            | 0.979<br>[0.927, 1.033]    | 0.965<br>[0.915, 1.018]   | 0.956<br>[0.899, 1.016]    | 1.051*<br>[0.993, 1.112]   | 0.969<br>[0.890, 1.056]    | 1.104***<br>[1.030, 1.184] | 1.106<br>[0.975, 1.255]    | 0.076<br>[0.073, 0.078] |
| Roof: roofing shingles           | 0.944<br>[0.855, 1.041]    | 0.950<br>[0.861, 1.047]   | 1.013<br>[0.910, 1.128]    | 0.871**<br>[0.782, 0.970]  | 1.136<br>[0.968, 1.333]    | 0.978<br>[0.859, 1.114]    | 1.328**<br>[1.056, 1.671]  | 0.020<br>[0.019, 0.021] |
| Roof: tiles                      | 1.124***<br>[1.058, 1.193] | 1.057*<br>[0.995, 1.122]  | 1.031<br>[0.964, 1.103]    | 1.020<br>[0.959, 1.086]    | 1.051<br>[0.954, 1.158]    | 1.120***<br>[1.037, 1.209] | 1.241***<br>[1.075, 1.433] | 0.071<br>[0.068, 0.073] |
| Roof: slate                      | 1.001<br>[0.946, 1.059]    | 0.986<br>[0.931, 1.044]   | 0.976<br>[0.914, 1.042]    | 0.970<br>[0.914, 1.030]    | 0.899**<br>[0.822, 0.983]  | 1.017<br>[0.944, 1.094]    | 1.180**<br>[1.040, 1.338]  | 0.081<br>[0.079, 0.084] |
| Roof: burnt brick                | 1.075**<br>[1.008, 1.147]  | 1.014<br>[0.951, 1.082]   | 1.003<br>[0.928, 1.085]    | 0.989<br>[0.923, 1.061]    | 0.999<br>[0.906, 1.101]    | 1.062<br>[0.963, 1.172]    | 1.112<br>[0.973, 1.271]    | 0.045<br>[0.043, 0.047] |
| Roof: thatch/palm leaf           | 0.997<br>[0.935, 1.062]    | 0.990<br>[0.929, 1.055]   | 0.993<br>[0.921, 1.070]    | 1.014<br>[0.947, 1.085]    | 0.981<br>[0.888, 1.083]    | 1.006<br>[0.915, 1.106]    | 1.118<br>[0.974, 1.282]    | 0.045<br>[0.043, 0.046] |
| Roof: other                      | 1.014<br>[0.919, 1.119]    | 1.135**<br>[1.029, 1.252] | 1.103*<br>[0.984, 1.237]   | 0.972<br>[0.876, 1.079]    | 0.875*<br>[0.757, 1.011]   | 1.145*<br>[0.999, 1.313]   | 1.364***<br>[1.115, 1.669] | 0.029<br>[0.027, 0.031] |
| Roof: mud                        | 1.172**<br>[1.031, 1.333]  | 1.047<br>[0.920, 1.190]   | 0.882<br>[0.759, 1.025]    | 0.913<br>[0.796, 1.047]    | 1.044<br>[0.858, 1.268]    | 0.925<br>[0.772, 1.107]    | 1.008<br>[0.755, 1.346]    | 0.009<br>[0.008, 0.009] |
| Roof: sod/mud and grass mixture  | 1.113*<br>[0.999, 1.241]   | 0.985<br>[0.883, 1.099]   | 1.046<br>[0.919, 1.190]    | 1.107*<br>[0.986, 1.244]   | 1.008<br>[0.854, 1.190]    | 1.098<br>[0.933, 1.292]    | 0.992<br>[0.781, 1.260]    | 0.009<br>[0.009, 0.010] |
| Roof: plastic/polythene sheeting | 1.132*<br>[0.993, 1.289]   | 1.052<br>[0.922, 1.201]   | 1.228***<br>[1.059, 1.424] | 1.184**<br>[1.026, 1.367]  | 1.113<br>[0.905, 1.370]    | 1.266**<br>[1.056, 1.519]  | 1.335*<br>[0.999, 1.784]   | 0.008<br>[0.007, 0.008] |
| Roof: rustic mat                 | 0.826<br>[0.610, 1.119]    | 0.781<br>[0.578, 1.055]   | 1.450**<br>[1.033, 2.037]  | 0.994<br>[0.720, 1.373]    | 1.091<br>[0.702, 1.698]    | 1.048<br>[0.667, 1.645]    | 0.625<br>[0.286, 1.367]    | 0.001<br>[0.001, 0.001] |
| Roof: palm/bamboo                | 1.028<br>[0.914, 1.156]    | 1.000<br>[0.890, 1.123]   | 1.058<br>[0.922, 1.213]    | 1.011<br>[0.892, 1.147]    | 1.105<br>[0.931, 1.311]    | 0.999<br>[0.833, 1.197]    | 1.303**<br>[1.029, 1.651]  | 0.007<br>[0.007, 0.008] |
| Roof: raw wood planks/timber     | 1.037<br>[0.896, 1.201]    | 0.946<br>[0.816, 1.097]   | 1.180*<br>[0.997, 1.397]   | 1.066<br>[0.914, 1.242]    | 1.363***<br>[1.098, 1.693] | 0.905<br>[0.737, 1.111]    | 1.160<br>[0.818, 1.646]    | 0.006<br>[0.006, 0.007] |

|                                |                |                |                |                |                |                |                |                |
|--------------------------------|----------------|----------------|----------------|----------------|----------------|----------------|----------------|----------------|
| Roof: unburnt bricks           | 1.160*         | 1.075          | 1.097          | 1.139          | 1.243*         | 1.138          | 1.211          | 0.005          |
|                                | [0.984, 1.366] | [0.914, 1.265] | [0.910, 1.322] | [0.956, 1.358] | [0.978, 1.581] | [0.920, 1.407] | [0.843, 1.741] | [0.005, 0.005] |
| Wall: cement/concrete          | RC             | 0.379          |
|                                |                |                |                |                |                |                |                | [0.373, 0.385] |
| Wall: no walls                 | 1.237**        | 1.293**        | 1.038          | 0.918          | 0.870          | 0.696**        | 0.834          | 0.003          |
|                                | [1.004, 1.524] | [1.051, 1.592] | [0.818, 1.317] | [0.737, 1.143] | [0.633, 1.196] | [0.519, 0.933] | [0.502, 1.384] | [0.003, 0.004] |
| Wall: raw/reused wood          | 1.147          | 0.957          | 1.006          | 1.155          | 0.879          | 1.277          | 1.100          | 0.003          |
|                                | [0.905, 1.453] | [0.747, 1.225] | [0.757, 1.339] | [0.881, 1.514] | [0.598, 1.290] | [0.928, 1.758] | [0.627, 1.929] | [0.002, 0.003] |
| Wall: stone with lime/cement   | 1.020          | 1.002          | 1.090**        | 1.131***       | 0.988          | 1.119***       | 1.060          | 0.059          |
|                                | [0.952, 1.093] | [0.934, 1.075] | [1.009, 1.178] | [1.055, 1.214] | [0.880, 1.108] | [1.031, 1.215] | [0.897, 1.252] | [0.057, 0.061] |
| Wall: burnt bricks             | 1.048**        | 1.024          | 1.037          | 1.034          | 0.945*         | 1.050*         | 1.080          | 0.252          |
|                                | [1.004, 1.093] | [0.981, 1.069] | [0.987, 1.089] | [0.989, 1.080] | [0.886, 1.007] | [0.994, 1.109] | [0.982, 1.188] | [0.247, 0.257] |
| Wall: cement blocks            | 1.000          | 1.037          | 1.106***       | 0.987          | 1.036          | 1.114***       | 1.228***       | 0.058          |
|                                | [0.939, 1.065] | [0.974, 1.105] | [1.031, 1.188] | [0.926, 1.053] | [0.941, 1.142] | [1.032, 1.202] | [1.057, 1.426] | [0.055, 0.060] |
| Wall: wood planks/shingles     | 0.914          | 0.854          | 0.847          | 0.926          | 1.066          | 1.062          | 1.297          | 0.002          |
|                                | [0.710, 1.175] | [0.657, 1.109] | [0.608, 1.180] | [0.709, 1.210] | [0.725, 1.567] | [0.748, 1.509] | [0.766, 2.196] | [0.002, 0.002] |
| Wall: GI/metal/asbestos sheets | 1.255***       | 0.945          | 1.090          | 1.181**        | 1.531***       | 0.967          | 1.778***       | 0.010          |
|                                | [1.087, 1.449] | [0.814, 1.097] | [0.918, 1.294] | [1.017, 1.372] | [1.207, 1.941] | [0.803, 1.164] | [1.262, 2.504] | [0.009, 0.011] |
| Wall: other                    | 0.751**        | 0.974          | 1.049          | 0.996          | 1.432*         | 0.941          | 0.549*         | 0.002          |
|                                | [0.591, 0.956] | [0.767, 1.238] | [0.802, 1.373] | [0.763, 1.299] | [0.983, 2.086] | [0.681, 1.300] | [0.274, 1.100] | [0.002, 0.002] |
| Wall: cane/palm/trunks         | 0.967          | 1.062          | 1.213***       | 1.014          | 0.959          | 1.115          | 1.030          | 0.016          |
|                                | [0.876, 1.067] | [0.962, 1.173] | [1.080, 1.361] | [0.913, 1.126] | [0.819, 1.123] | [0.963, 1.291] | [0.830, 1.280] | [0.015, 0.017] |
| Wall: mud                      | 0.976          | 1.004          | 1.056*         | 1.145***       | 0.988          | 1.108***       | 1.104          | 0.136          |
|                                | [0.924, 1.030] | [0.951, 1.060] | [0.993, 1.123] | [1.081, 1.212] | [0.907, 1.076] | [1.031, 1.190] | [0.978, 1.247] | [0.132, 0.139] |
| Wall: grass/reeds/thatch       | 1.140**        | 1.100*         | 0.951          | 0.995          | 1.015          | 1.244**        | 1.083          | 0.009          |
|                                | [1.017, 1.278] | [0.982, 1.232] | [0.829, 1.089] | [0.880, 1.125] | [0.858, 1.201] | [1.038, 1.493] | [0.851, 1.379] | [0.008, 0.009] |
| Wall: bamboo with mud          | 1.092**        | 1.103**        | 1.063          | 1.023          | 0.991          | 0.965          | 1.223**        | 0.028          |
|                                | [1.006, 1.185] | [1.015, 1.197] | [0.966, 1.170] | [0.937, 1.117] | [0.868, 1.132] | [0.852, 1.094] | [1.021, 1.466] | [0.027, 0.029] |
| Wall: stone with mud           | 1.069          | 1.102**        | 1.189***       | 0.995          | 0.904          | 1.094          | 1.217*         | 0.021          |
|                                | [0.972, 1.175] | [1.002, 1.213] | [1.071, 1.321] | [0.900, 1.099] | [0.774, 1.056] | [0.969, 1.235] | [0.984, 1.507] | [0.020, 0.022] |
| Wall: plywood                  | 0.911          | 0.693          | 0.958          | 1.426          | 1.852**        | 1.200          | 0.270*         | 0.001          |
|                                | [0.593, 1.399] | [0.447, 1.076] | [0.573, 1.604] | [0.894, 2.273] | [1.001, 3.428] | [0.669, 2.156] | [0.063, 1.147] | [0.001, 0.001] |
| Wall: cardboard                | 1.108          | 1.006          | 0.934          | 0.648**        | 0.624          | 1.012          | 0.887          | 0.001          |
|                                | [0.742, 1.656] | [0.665, 1.521] | [0.574, 1.518] | [0.420, 1.000] | [0.337, 1.154] | [0.604, 1.698] | [0.304, 2.585] | [0.001, 0.001] |
| Wall: unburnt brick            | 1.100**        | 1.011          | 0.978          | 1.127***       | 0.888*         | 1.005          | 1.289***       | 0.021          |
|                                | [1.011, 1.196] | [0.930, 1.100] | [0.888, 1.078] | [1.031, 1.232] | [0.778, 1.013] | [0.900, 1.123] | [1.072, 1.550] | [0.020, 0.022] |

**e) Other**

|                                       |                            |                            |                            |                            |                            |                            |                            |                         |
|---------------------------------------|----------------------------|----------------------------|----------------------------|----------------------------|----------------------------|----------------------------|----------------------------|-------------------------|
| Staff                                 | 0.822<br>[0.553, 1.221]    | 1.015<br>[0.665, 1.549]    | 0.919<br>[0.589, 1.433]    | 0.921<br>[0.631, 1.344]    | 1.177<br>[0.717, 1.934]    | 0.985<br>[0.603, 1.610]    | 1.455<br>[0.727, 2.914]    | 0.002<br>[0.001, 0.002] |
| Bank account                          | 0.936***<br>[0.903, 0.971] | 0.969*<br>[0.934, 1.005]   | 0.974<br>[0.934, 1.016]    | 0.963*<br>[0.926, 1.002]   | 1.113***<br>[1.050, 1.181] | 0.914***<br>[0.867, 0.963] | 0.975<br>[0.900, 1.056]    | 0.895<br>[0.893, 0.897] |
| Electricity                           | 0.972<br>[0.930, 1.017]    | 0.956*<br>[0.915, 1.000]   | 0.975<br>[0.926, 1.028]    | 0.985<br>[0.938, 1.034]    | 1.008<br>[0.940, 1.080]    | 0.998<br>[0.930, 1.070]    | 0.968<br>[0.882, 1.061]    | 0.882<br>[0.879, 0.885] |
| Animal-drawn cart                     | 0.986<br>[0.927, 1.048]    | 1.040<br>[0.979, 1.105]    | 1.025<br>[0.957, 1.099]    | 1.028<br>[0.964, 1.096]    | 0.974<br>[0.886, 1.071]    | 1.002<br>[0.925, 1.086]    | 1.045<br>[0.909, 1.201]    | 0.036<br>[0.035, 0.037] |
| Land usable for agriculture           | 0.987<br>[0.960, 1.016]    | 0.929***<br>[0.903, 0.955] | 0.945***<br>[0.915, 0.976] | 0.935***<br>[0.908, 0.963] | 0.955**<br>[0.914, 0.998]  | 1.002<br>[0.964, 1.042]    | 0.964<br>[0.905, 1.026]    | 0.389<br>[0.384, 0.394] |
| Internet                              | 1.049<br>[0.990, 1.111]    | 0.970<br>[0.914, 1.029]    | 0.902***<br>[0.844, 0.964] | 1.003<br>[0.948, 1.062]    | 1.002<br>[0.921, 1.090]    | 0.933*<br>[0.870, 1.001]   | 0.966<br>[0.839, 1.111]    | 0.109<br>[0.106, 0.112] |
| Thresher                              | 1.041<br>[0.942, 1.151]    | 1.110**<br>[1.003, 1.228]  | 1.223***<br>[1.092, 1.369] | 0.960<br>[0.867, 1.062]    | 1.065<br>[0.917, 1.235]    | 1.037<br>[0.912, 1.179]    | 1.167<br>[0.929, 1.466]    | 0.015<br>[0.014, 0.015] |
| Tractor                               | 1.002<br>[0.929, 1.081]    | 0.961<br>[0.890, 1.038]    | 0.908**<br>[0.832, 0.992]  | 1.083**<br>[1.002, 1.169]  | 1.058<br>[0.944, 1.185]    | 0.987<br>[0.895, 1.088]    | 0.808**<br>[0.678, 0.963]  | 0.025<br>[0.024, 0.025] |
| Household member owns a house         | 1.038**<br>[1.003, 1.074]  | 1.010<br>[0.976, 1.045]    | 1.002<br>[0.963, 1.042]    | 0.983<br>[0.949, 1.019]    | 1.026<br>[0.973, 1.082]    | 0.948**<br>[0.907, 0.991]  | 1.002<br>[0.926, 1.085]    | 0.798<br>[0.794, 0.803] |
| <b>Covariates</b>                     |                            |                            |                            |                            |                            |                            |                            |                         |
| Birth interval (months)               | 0.995***<br>[0.994, 0.996] | 0.996***<br>[0.995, 0.996] | 0.999***<br>[0.998, 1.000] | 0.999***<br>[0.998, 0.999] | 1.000<br>[0.999, 1.001]    | 0.999*<br>[0.998, 1.000]   | 0.995***<br>[0.993, 0.996] |                         |
| Birth order                           | 1.137***<br>[1.107, 1.169] | 1.202***<br>[1.169, 1.236] | 1.146***<br>[1.107, 1.185] | 0.994<br>[0.966, 1.022]    | 1.776***<br>[1.686, 1.871] | 0.960**<br>[0.923, 0.998]  | 0.341***<br>[0.323, 0.359] |                         |
| Age (months)                          | 1.016***<br>[1.015, 1.017] | 1.013***<br>[1.012, 1.013] | 0.986***<br>[0.985, 0.987] | 0.968***<br>[0.967, 0.969] | 0.978***<br>[0.977, 0.979] | 0.998***<br>[0.997, 0.999] | 0.978***<br>[0.976, 0.980] |                         |
| Dropped                               | 20,122                     | 26,361                     | 47,479                     | 23,334                     | 111,277                    | 54,937                     | 146,398                    |                         |
| Female                                | 0.945***<br>[0.925, 0.966] | 0.968***<br>[0.947, 0.989] | 0.889***<br>[0.867, 0.911] | 1.003<br>[0.981, 1.026]    | 0.940***<br>[0.908, 0.972] | 1.199***<br>[1.165, 1.233] | 0.796***<br>[0.759, 0.834] |                         |
| First born                            | 0.751***<br>[0.721, 0.783] | 0.833***<br>[0.799, 0.868] | 0.991<br>[0.945, 1.039]    | 0.899***<br>[0.861, 0.938] | 1.025<br>[0.961, 1.094]    | 1.171***<br>[1.108, 1.237] | 1.104**<br>[1.013, 1.203]  |                         |
| Delivered at home                     | 1.007<br>[0.977, 1.039]    | 1.083***<br>[1.051, 1.117] | 1.055***<br>[1.017, 1.094] | 1.013<br>[0.980, 1.047]    | 0.928***<br>[0.884, 0.975] | 1.255***<br>[1.185, 1.330] | 1.166***<br>[1.095, 1.241] |                         |
| Mother's age at birth (years)         | 0.927***<br>[0.910, 0.944] | 0.949***<br>[0.932, 0.967] | 0.983<br>[0.962, 1.004]    | 0.992<br>[0.973, 1.012]    | 0.974*<br>[0.945, 1.003]   | 0.950***<br>[0.925, 0.975] | 0.907***<br>[0.875, 0.941] |                         |
| Mother's age at birth (years) squared | 1.001***                   | 1.001***                   | 1.000**                    | 1.000                      | 1.000                      | 1.001***                   | 1.002***                   |                         |

|                                   |                |                |                |                |                |                |                |
|-----------------------------------|----------------|----------------|----------------|----------------|----------------|----------------|----------------|
|                                   | [1.001, 1.002] | [1.000, 1.001] | [1.000, 1.001] | [1.000, 1.000] | [1.000, 1.001] | [1.001, 1.001] | [1.001, 1.003] |
| Maternal height (z-score)         | 0.677***       | 0.708***       | 0.947***       | 0.970***       | 1.034***       | 0.830***       | 0.900***       |
|                                   | [0.668, 0.685] | [0.699, 0.717] | [0.933, 0.960] | [0.957, 0.982] | [1.015, 1.054] | [0.816, 0.844] | [0.875, 0.925] |
| Received no vaccination           | 0.891***       | 0.931***       | 1.046*         | 1.052**        | 0.865***       |                |                |
|                                   | [0.853, 0.932] | [0.890, 0.973] | [0.994, 1.102] | [1.002, 1.104] | [0.806, 0.928] |                |                |
| Siblings ever born                | 0.902***       | 0.857***       | 0.874***       | 1.036***       | 0.550***       | 0.992          | 3.710***       |
|                                   | [0.879, 0.925] | [0.835, 0.879] | [0.847, 0.902] | [1.009, 1.064] | [0.524, 0.578] | [0.957, 1.027] | [3.530, 3.899] |
| Mother's education: none          | RC             |
| Mother's education: primary       | 0.935***       | 0.926***       | 0.941***       | 0.945***       | 1.123***       | 1.025          | 1.067          |
|                                   | [0.902, 0.970] | [0.892, 0.960] | [0.901, 0.983] | [0.909, 0.984] | [1.060, 1.189] | [0.974, 1.080] | [0.986, 1.154] |
| Mother's education: secondary     | 0.831***       | 0.848***       | 0.935***       | 0.876***       | 1.078***       | 0.899***       | 0.924**        |
|                                   | [0.804, 0.859] | [0.820, 0.876] | [0.899, 0.972] | [0.845, 0.908] | [1.023, 1.137] | [0.858, 0.941] | [0.858, 0.995] |
| Mother's education: higher        | 0.685***       | 0.686***       | 0.859***       | 0.765***       | 0.959          | 0.763***       | 0.859**        |
|                                   | [0.647, 0.726] | [0.647, 0.727] | [0.805, 0.916] | [0.722, 0.810] | [0.881, 1.044] | [0.711, 0.820] | [0.747, 0.988] |
| Wealth quintile: first            | RC             |
| Wealth quintile: second           | 1.005          | 0.977          | 0.986          | 1.049*         | 1.028          | 1.089**        | 1.101*         |
|                                   | [0.954, 1.059] | [0.927, 1.029] | [0.928, 1.048] | [0.991, 1.110] | [0.946, 1.116] | [1.010, 1.174] | [0.982, 1.234] |
| Wealth quintile: third            | 0.959          | 0.889***       | 0.997          | 1.104**        | 1.045          | 1.156**        | 1.258**        |
|                                   | [0.881, 1.044] | [0.816, 0.969] | [0.903, 1.100] | [1.009, 1.209] | [0.915, 1.194] | [1.028, 1.300] | [1.039, 1.523] |
| Wealth quintile: fourth           | 0.921          | 0.889*         | 1.009          | 1.018          | 1.015          | 1.350***       | 1.377**        |
|                                   | [0.818, 1.036] | [0.790, 1.002] | [0.880, 1.158] | [0.899, 1.153] | [0.843, 1.221] | [1.151, 1.582] | [1.051, 1.805] |
| Wealth quintile: fifth            | 0.895          | 0.829**        | 1.049          | 1.117          | 0.944          | 1.312***       | 1.508**        |
|                                   | [0.767, 1.046] | [0.709, 0.969] | [0.878, 1.254] | [0.952, 1.311] | [0.742, 1.201] | [1.071, 1.606] | [1.046, 2.174] |
| Caste/tribe: schedule caste       | RC             |
| Caste/tribe: schedule tribe       | 0.988          | 1.061**        | 1.069**        | 1.154***       | 0.786***       | 1.051          | 0.847**        |
|                                   | [0.933, 1.046] | [1.002, 1.123] | [1.003, 1.139] | [1.085, 1.227] | [0.716, 0.862] | [0.975, 1.131] | [0.744, 0.965] |
| Caste/tribe: other backward class | 0.922***       | 0.940***       | 0.998          | 0.913***       | 0.880***       | 0.970          | 0.941          |
|                                   | [0.892, 0.954] | [0.909, 0.973] | [0.959, 1.038] | [0.881, 0.946] | [0.835, 0.927] | [0.926, 1.015] | [0.873, 1.014] |
| Caste/tribe: none of them         | 0.832***       | 0.862***       | 0.943**        | 0.937***       | 0.888***       | 0.975          | 0.949          |
|                                   | [0.796, 0.868] | [0.825, 0.900] | [0.897, 0.991] | [0.896, 0.980] | [0.831, 0.949] | [0.922, 1.030] | [0.860, 1.048] |
| Caste/tribe: don't know           | 0.849**        | 0.956          | 1.126          | 1.269***       | 0.983          | 1.228**        | 0.723**        |
|                                   | [0.742, 0.972] | [0.833, 1.096] | [0.960, 1.321] | [1.096, 1.471] | [0.800, 1.209] | [1.038, 1.452] | [0.523, 1.000] |
| Singleton birth                   | RC             |

|                              |                            |                            |                            |                            |                         |                               |                             |         |
|------------------------------|----------------------------|----------------------------|----------------------------|----------------------------|-------------------------|-------------------------------|-----------------------------|---------|
| First born twin/triplet etc. | 1.511***<br>[1.330, 1.717] | 1.918***<br>[1.687, 2.182] | 1.350***<br>[1.171, 1.557] | 1.197***<br>[1.045, 1.371] | 1.057<br>[0.837, 1.334] | 11.835***<br>[10.199, 13.732] | 1.431***<br>[1.198, 1.710]  |         |
| Later born twin/triplet etc. | 1.394***<br>[1.219, 1.593] | 1.886***<br>[1.648, 2.158] | 1.323***<br>[1.141, 1.534] | 1.263***<br>[1.092, 1.460] | 0.950<br>[0.767, 1.177] | 13.902***<br>[11.986, 16.124] | 9.994***<br>[8.487, 11.769] |         |
| Observations                 | 184,116                    | 177,877                    | 156,759                    | 167,990                    | 110,276                 | 117,894                       | 86,172                      | 601,509 |

Notes: \*\*\* p<0.01, \*\* p<0.05, \* p<0.1. Odds ratios are shown. All estimates were weighted and tests for statistical significance and 95% confidence intervals (shown in brackets) were calculated using robust standard errors. All estimates in each column were obtained from a single model. Control variables: sex, age, maternal age at birth, birth order, birth interval, firstborn, twin, vaccination status (except for mortality and low birth weight), born at home, maternal education, caste/tribe, and wealth index quintiles. Models were further adjusted for unobserved PSU-level factors. Proportions are for all households interviewed. Acronyms and abbreviations: liquefied petroleum gas (LPG), reinforced cement concrete (RCC), reinforced brick concrete (RBC), galvanized iron (GI), granite (grani.), shared (sh.), sewer system (sewer s.), without (w/o), with(w/), reverse osmosis (RO), reference category (RC).

Table A6. Results for height-for-age (z-score), weight-for-age (z-score), weight-for-age (z-score), hemoglobin level (g/dl), and birth weight (grams) from fixed effects linear regression models.

|                                       | <u>Height-for-age</u>      | <u>Weight-for-age</u>     | <u>Weight-for-height</u>   | <u>Hemoglobin</u>          | <u>Birthweight</u>                | <u>Proportion (households)</u> |
|---------------------------------------|----------------------------|---------------------------|----------------------------|----------------------------|-----------------------------------|--------------------------------|
| <b>a) Water and toilet facilities</b> |                            |                           |                            |                            |                                   |                                |
| Water pump                            | 0.022<br>[-0.010, 0.055]   | -0.014<br>[-0.044, 0.016] | 0.005<br>[-0.021, 0.031]   | -0.022<br>[-0.056, 0.012]  | 9.990<br>[-4.811, 24.790]         | 0.172<br>[0.169, 0.176]        |
| Toilet: no facility/bush/field        | RC                         | RC                        | RC                         | RC                         | RC                                | 0.389<br>[0.383, 0.395]        |
| Toilet: flush to piped sewer system   | 0.089*<br>[-0.008, 0.187]  | -0.044<br>[-0.135, 0.047] | 0.026<br>[-0.049, 0.100]   | 0.064<br>[-0.022, 0.150]   | 14.507<br>[-20.101, 49.116]       | 0.078<br>[0.074, 0.083]        |
| Toilet: composting toilet             | 0.002<br>[-0.259, 0.262]   | -0.117<br>[-0.314, 0.080] | -0.057<br>[-0.240, 0.126]  | -0.097<br>[-0.413, 0.218]  | 50.224<br>[-79.766, 180.214]      | 0.001<br>[0.001, 0.001]        |
| Toilet: dry toilet                    | 0.296***<br>[0.091, 0.501] | 0.017<br>[-0.149, 0.182]  | 0.193**<br>[0.026, 0.359]  | 0.291***<br>[0.086, 0.497] | -105.637**<br>[-194.994, -16.280] | 0.004<br>[0.003, 0.004]        |
| Toilet: other                         | 0.133<br>[-0.126, 0.392]   | 0.127<br>[-0.240, 0.495]  | 0.177<br>[-0.148, 0.501]   | -0.114<br>[-0.669, 0.440]  | 85.841<br>[-134.801, 306.482]     | 0.001<br>[0.001, 0.001]        |
| Toilet: sh. Flush to piped sewer s.   | -0.032<br>[-0.212, 0.147]  | -0.064<br>[-0.212, 0.085] | -0.064<br>[-0.180, 0.052]  | 0.031<br>[-0.129, 0.191]   | -1.709<br>[-54.944, 51.525]       | 0.012<br>[0.010, 0.013]        |
| Toilet: shared flush to septic tank   | 0.088***<br>[0.026, 0.149] | 0.035<br>[-0.015, 0.085]  | 0.075***<br>[0.030, 0.119] | 0.056*<br>[-0.000, 0.112]  | -13.348<br>[-39.057, 12.361]      | 0.054<br>[0.052, 0.057]        |
| Toilet: shared flush to pit latrine   | 0.067<br>[-0.029, 0.162]   | 0.047<br>[-0.042, 0.136]  | 0.068*<br>[-0.001, 0.138]  | 0.055<br>[-0.030, 0.140]   | 19.928<br>[-20.405, 60.262]       | 0.014<br>[0.013, 0.015]        |
| Toilet: sh. Flush to somewhere else   | 0.302<br>[-0.120, 0.724]   | -0.133<br>[-0.351, 0.084] | 0.073<br>[-0.188, 0.334]   | -0.080<br>[-0.413, 0.252]  | -130.685*<br>[-279.355, 17.986]   | 0.004<br>[0.003, 0.005]        |
| Toilet: sh. Flush don't know where    | -0.087<br>[-0.877, 0.703]  | -0.312<br>[-0.865, 0.242] | -0.358<br>[-0.993, 0.278]  | -0.136<br>[-0.727, 0.456]  | -83.294<br>[-307.740, 141.153]    | 0.000<br>[0.000, 0.000]        |
| Toilet: sh. Ventilated improved pit   | 0.371***<br>[0.093, 0.649] | 0.132<br>[-0.109, 0.373]  | 0.317***<br>[0.104, 0.530] | 0.094<br>[-0.215, 0.403]   | -39.530<br>[-158.414, 79.354]     | 0.001<br>[0.001, 0.002]        |
| Toilet: shared pit latrine w/ slab    | 0.004<br>[-0.118, 0.127]   | -0.082<br>[-0.197, 0.034] | -0.063<br>[-0.153, 0.028]  | 0.080<br>[-0.049, 0.209]   | 3.535<br>[-48.649, 55.720]        | 0.009<br>[0.009, 0.010]        |
| Toilet: flush to septic tank          | 0.094***<br>[0.054, 0.135] | 0.033*<br>[-0.002, 0.069] | 0.079***<br>[0.048, 0.109] | 0.096***<br>[0.057, 0.135] | 6.137<br>[-11.544, 23.819]        | 0.287<br>[0.283, 0.292]        |
| Toilet: sh. Pit w/o slab/open pit     | -0.182*<br>[-0.368, 0.005] | 0.007<br>[-0.171, 0.186]  | -0.102<br>[-0.253, 0.048]  | -0.113<br>[-0.263, 0.038]  | 13.717<br>[-49.937, 77.371]       | 0.003<br>[0.003, 0.003]        |
| Toilet: shared composting toilet      | 0.370<br>[-0.369, 1.110]   | 0.323<br>[-0.200, 0.846]  | 0.412<br>[-0.327, 1.152]   | 0.448**<br>[0.018, 0.878]  | 245.443**<br>[37.396, 453.490]    | 0.000<br>[0.000, 0.001]        |
| Toilet: shared dry toilet             | -0.120                     | 0.088                     | -0.009                     | 0.009                      | 108.020                           | 0.001                          |

|                                   |                  |                 |                 |                 |                     |                |
|-----------------------------------|------------------|-----------------|-----------------|-----------------|---------------------|----------------|
|                                   | [-0.523, 0.283]  | [-0.272, 0.448] | [-0.347, 0.329] | [-0.286, 0.304] | [-40.679, 256.719]  | [0.001, 0.001] |
| Toilet: shared other              | 0.162            | -0.181          | -0.016          | -0.280          | -178.111**          | 0.002          |
|                                   | [-0.245, 0.570]  | [-0.730, 0.369] | [-0.459, 0.428] | [-0.649, 0.090] | [-340.238, -15.984] | [0.001, 0.002] |
| Toilet: flush to pit latrine      | 0.047*           | 0.033           | 0.049**         | 0.080***        | 22.590*             | 0.072          |
|                                   | [-0.007, 0.101]  | [-0.012, 0.078] | [0.009, 0.089]  | [0.029, 0.131]  | [-2.651, 47.831]    | [0.070, 0.074] |
| Toilet: flush to somewhere else   | -0.033           | 0.101           | 0.042           | 0.013           | 29.183              | 0.009          |
|                                   | [-0.242, 0.176]  | [-0.039, 0.241] | [-0.090, 0.173] | [-0.140, 0.166] | [-54.461, 112.827]  | [0.008, 0.010] |
| Toilet: flush don't know where    | 0.033            | -0.046          | -0.003          | -0.136          | 20.543              | 0.001          |
|                                   | [-0.496, 0.562]  | [-0.373, 0.281] | [-0.249, 0.243] | [-0.588, 0.317] | [-123.225, 164.311] | [0.001, 0.001] |
| Toilet: ventilated improved pit   | 0.058            | 0.169*          | 0.149**         | 0.104           | 53.531              | 0.006          |
|                                   | [-0.099, 0.215]  | [-0.001, 0.339] | [0.019, 0.278]  | [-0.042, 0.250] | [-14.874, 121.936]  | [0.005, 0.006] |
| Toilet: pit latrine with slab     | 0.075**          | 0.066**         | 0.089***        | 0.061**         | 0.942               | 0.039          |
|                                   | [0.012, 0.137]   | [0.005, 0.128]  | [0.039, 0.140]  | [0.001, 0.122]  | [-24.483, 26.366]   | [0.038, 0.041] |
| Toilet: pit without slab/open pit | 0.085*           | -0.034          | 0.030           | 0.006           | 24.200              | 0.011          |
|                                   | [-0.012, 0.182]  | [-0.119, 0.051] | [-0.043, 0.104] | [-0.089, 0.101] | [-16.475, 64.875]   | [0.011, 0.012] |
| Water: tube well or borehole      | RC               | RC              | RC              | RC              | RC                  | 0.392          |
|                                   |                  |                 |                 |                 |                     | [0.386, 0.399] |
| Water: piped into dwelling        | 0.028            | 0.020           | 0.032           | 0.004           | -6.575              | 0.166          |
|                                   | [-0.025, 0.081]  | [-0.029, 0.069] | [-0.008, 0.072] | [-0.047, 0.055] | [-27.516, 14.365]   | [0.161, 0.171] |
| Water: rainwater                  | -0.296**         | 0.082           | -0.119          | 0.184           | 1.441               | 0.002          |
|                                   | [-0.566, -0.026] | [-0.158, 0.323] | [-0.339, 0.101] | [-0.088, 0.455] | [-122.144, 125.027] | [0.001, 0.002] |
| Water: tanker truck               | 0.002            | -0.019          | -0.003          | 0.099           | 15.818              | 0.013          |
|                                   | [-0.130, 0.134]  | [-0.138, 0.099] | [-0.101, 0.095] | [-0.021, 0.219] | [-33.636, 65.272]   | [0.011, 0.016] |
| Water: cart with small tank       | 0.118            | -0.113          | -0.019          | 0.263*          | 56.179              | 0.002          |
|                                   | [-0.148, 0.384]  | [-0.343, 0.117] | [-0.216, 0.179] | [-0.029, 0.555] | [-85.943, 198.300]  | [0.001, 0.002] |
| Water: bottled water              | 0.060            | 0.011           | 0.036           | 0.085           | 9.427               | 0.031          |
|                                   | [-0.053, 0.172]  | [-0.097, 0.118] | [-0.053, 0.126] | [-0.027, 0.198] | [-34.530, 53.384]   | [0.029, 0.033] |
| Water: community RO plant         | 0.043            | -0.033          | 0.008           | 0.125           | -15.617             | 0.005          |
|                                   | [-0.120, 0.206]  | [-0.192, 0.127] | [-0.123, 0.139] | [-0.037, 0.287] | [-88.461, 57.227]   | [0.005, 0.006] |
| Water: other                      | 0.012            | 0.117           | 0.087           | -0.047          | 29.957              | 0.002          |
|                                   | [-0.232, 0.256]  | [-0.110, 0.345] | [-0.115, 0.289] | [-0.371, 0.277] | [-92.117, 152.031]  | [0.001, 0.002] |
| Water: piped to yard/plot         | -0.025           | 0.034           | 0.008           | 0.057**         | 3.487               | 0.136          |
|                                   | [-0.078, 0.028]  | [-0.013, 0.081] | [-0.030, 0.046] | [0.007, 0.106]  | [-17.088, 24.061]   | [0.132, 0.139] |
| Water: public tap/standpipe       | -0.031           | 0.002           | -0.018          | -0.008          | 1.348               | 0.159          |
|                                   | [-0.077, 0.016]  | [-0.041, 0.045] | [-0.054, 0.018] | [-0.051, 0.035] | [-17.360, 20.055]   | [0.155, 0.163] |
| Water: protected well             | -0.065           | -0.026          | -0.055*         | -0.071*         | -46.028***          | 0.037          |

|                                        |                  |                  |                 |                 |                     |                |
|----------------------------------------|------------------|------------------|-----------------|-----------------|---------------------|----------------|
| Water: unprotected well                | 0.018            | -0.019           | -0.001          | 0.029           | -19.200*            | 0.042          |
|                                        | [-0.151, 0.021]  | [-0.102, 0.050]  | [-0.117, 0.007] | [-0.152, 0.009] | [-80.028, -12.029]  | [0.034, 0.039] |
| Water: protected spring                | 0.122            | -0.155**         | -0.037          | 0.007           | -27.824             | 0.003          |
|                                        | [-0.034, 0.069]  | [-0.064, 0.026]  | [-0.042, 0.040] | [-0.018, 0.076] | [-41.413, 3.014]    | [0.041, 0.044] |
| Water: unprotected spring              | 0.143*           | 0.030            | 0.093           | 0.085           | -22.608             | 0.004          |
|                                        | [-0.031, 0.275]  | [-0.284, -0.025] | [-0.136, 0.062] | [-0.154, 0.169] | [-97.678, 42.029]   | [0.003, 0.004] |
| Water: river/dam/lake/ponds etc.       | 0.099            | -0.054           | 0.028           | 0.078           | -10.999             | 0.007          |
|                                        | [-0.000, 0.287]  | [-0.125, 0.186]  | [-0.035, 0.222] | [-0.060, 0.229] | [-102.397, 57.181]  | [0.004, 0.004] |
|                                        | [-0.038, 0.236]  | [-0.180, 0.071]  | [-0.065, 0.120] | [-0.043, 0.198] | [-59.766, 37.767]   | [0.006, 0.007] |
| <b>b) Food storage and preparation</b> |                  |                  |                 |                 |                     |                |
| Refrigerator                           | 0.052**          | 0.039*           | 0.053***        | -0.006          | 12.158              | 0.296          |
|                                        | [0.007, 0.098]   | [-0.000, 0.078]  | [0.020, 0.087]  | [-0.047, 0.036] | [-6.331, 30.648]    | [0.291, 0.302] |
| Pressure cooker                        | 0.028*           | 0.020            | 0.031***        | 0.028*          | 10.552              | 0.566          |
|                                        | [-0.004, 0.061]  | [-0.007, 0.047]  | [0.007, 0.055]  | [-0.004, 0.059] | [-3.626, 24.729]    | [0.561, 0.572] |
| Cooking: wood                          | RC               | RC               | RC              | RC              | RC                  | 0.405          |
|                                        |                  |                  |                 |                 |                     | [0.399, 0.411] |
| Cooking: electricity                   | -0.023           | -0.096           | -0.071          | -0.039          | -42.565             | 0.006          |
|                                        | [-0.207, 0.161]  | [-0.282, 0.090]  | [-0.193, 0.051] | [-0.194, 0.116] | [-107.063, 21.933]  | [0.006, 0.007] |
| Cooking: animal dung                   | -0.020           | -0.009           | -0.018          | -0.000          | -5.662              | 0.072          |
|                                        | [-0.061, 0.020]  | [-0.042, 0.024]  | [-0.047, 0.011] | [-0.040, 0.039] | [-26.641, 15.317]   | [0.069, 0.074] |
| Cooking: no food cooked in house       | -1.194           | -0.814*          | -1.232          | -0.201          | -149.215            | 0.003          |
|                                        | [-2.936, 0.549]  | [-1.726, 0.097]  | [-2.791, 0.328] | [-0.973, 0.571] | [-419.149, 120.720] | [0.002, 0.003] |
| Cooking: other                         | -0.308*          | -0.058           | -0.213          | -0.068          | -83.864             | 0.000          |
|                                        | [-0.672, 0.056]  | [-0.449, 0.334]  | [-0.483, 0.056] | [-0.554, 0.418] | [-268.813, 101.086] | [0.000, 0.001] |
| Cooking: LPG/natural gas               | 0.071***         | 0.037**          | 0.067***        | 0.011           | 18.848**            | 0.423          |
|                                        | [0.030, 0.112]   | [0.002, 0.072]   | [0.037, 0.096]  | [-0.027, 0.049] | [2.335, 35.361]     | [0.416, 0.430] |
| Cooking: biogas                        | 0.050            | 0.122            | 0.099           | -0.102          | -40.969             | 0.008          |
|                                        | [-0.120, 0.221]  | [-0.034, 0.279]  | [-0.028, 0.225] | [-0.248, 0.044] | [-98.980, 17.041]   | [0.007, 0.009] |
| Cooking: kerosene                      | -0.026           | -0.036           | -0.042          | 0.001           | -16.189             | 0.012          |
|                                        | [-0.194, 0.143]  | [-0.179, 0.106]  | [-0.172, 0.088] | [-0.145, 0.147] | [-75.863, 43.485]   | [0.011, 0.013] |
| Cooking: coal, lignite                 | -0.056           | 0.022            | -0.029          | 0.052           | 35.095              | 0.009          |
|                                        | [-0.205, 0.092]  | [-0.101, 0.144]  | [-0.129, 0.071] | [-0.056, 0.160] | [-24.348, 94.538]   | [0.008, 0.010] |
| Cooking: charcoal                      | -0.084           | 0.023            | -0.041          | 0.053           | 35.127              | 0.006          |
|                                        | [-0.268, 0.101]  | [-0.126, 0.173]  | [-0.188, 0.105] | [-0.074, 0.180] | [-26.215, 96.468]   | [0.005, 0.006] |
| Cooking: straw/shrubs/grass            | -0.072**         | -0.001           | -0.042          | -0.046          | -26.605             | 0.025          |
|                                        | [-0.141, -0.003] | [-0.066, 0.063]  | [-0.096, 0.013] | [-0.115, 0.023] | [-60.133, 6.923]    | [0.024, 0.027] |

|                                |                              |                            |                               |                            |                              |                         |
|--------------------------------|------------------------------|----------------------------|-------------------------------|----------------------------|------------------------------|-------------------------|
| Cooking: agricultural crop     | -0.069**<br>[-0.132, -0.006] | -0.039<br>[-0.092, 0.013]  | -0.069***<br>[-0.115, -0.022] | 0.032<br>[-0.026, 0.089]   | -19.092<br>[-48.850, 10.666] | 0.030<br>[0.028, 0.032] |
| <b>c) Other consumer goods</b> |                              |                            |                               |                            |                              |                         |
| Radio                          | 0.034<br>[-0.009, 0.077]     | -0.010<br>[-0.050, 0.029]  | 0.007<br>[-0.028, 0.042]      | -0.021<br>[-0.063, 0.022]  | -7.190<br>[-25.059, 10.679]  | 0.081<br>[0.080, 0.083] |
| Bicycle                        | 0.037***<br>[0.012, 0.063]   | -0.021*<br>[-0.043, 0.001] | 0.006<br>[-0.013, 0.025]      | 0.028**<br>[0.005, 0.051]  | -2.567<br>[-13.478, 8.344]   | 0.521<br>[0.516, 0.526] |
| Motorcycle/scooter             | 0.059***<br>[0.027, 0.090]   | 0.014<br>[-0.013, 0.041]   | 0.042***<br>[0.019, 0.065]    | 0.025*<br>[-0.003, 0.053]  | 8.929<br>[-3.444, 21.303]    | 0.377<br>[0.372, 0.381] |
| Car/truck                      | 0.079**<br>[0.014, 0.143]    | 0.076**<br>[0.014, 0.138]  | 0.091***<br>[0.038, 0.145]    | 0.009<br>[-0.052, 0.070]   | 10.116<br>[-11.907, 32.139]  | 0.060<br>[0.058, 0.063] |
| Telephone (land-line)          | 0.072<br>[-0.030, 0.173]     | -0.039<br>[-0.125, 0.048]  | 0.015<br>[-0.066, 0.096]      | 0.030<br>[-0.052, 0.113]   | 18.199<br>[-13.562, 49.960]  | 0.039<br>[0.037, 0.041] |
| Mobile telephone               | 0.070***<br>[0.027, 0.113]   | 0.062***<br>[0.026, 0.098] | 0.078***<br>[0.047, 0.110]    | 0.055***<br>[0.016, 0.093] | 23.986**<br>[4.001, 43.970]  | 0.904<br>[0.902, 0.906] |
| Watch                          | 0.027*<br>[-0.002, 0.057]    | -0.012<br>[-0.036, 0.013]  | 0.007<br>[-0.014, 0.029]      | 0.034**<br>[0.008, 0.061]  | -4.084<br>[-17.644, 9.476]   | 0.781<br>[0.778, 0.785] |
| Mattress                       | 0.021<br>[-0.010, 0.051]     | 0.017<br>[-0.009, 0.042]   | 0.024**<br>[0.001, 0.046]     | 0.024<br>[-0.005, 0.052]   | 0.048<br>[-13.319, 13.416]   | 0.667<br>[0.662, 0.672] |
| Chair                          | 0.016<br>[-0.017, 0.049]     | -0.001<br>[-0.026, 0.025]  | 0.010<br>[-0.014, 0.034]      | 0.020<br>[-0.009, 0.049]   | 4.936<br>[-10.245, 20.117]   | 0.762<br>[0.758, 0.765] |
| Cot/bed                        | -0.023<br>[-0.077, 0.031]    | 0.020<br>[-0.019, 0.060]   | -0.001<br>[-0.037, 0.036]     | -0.006<br>[-0.049, 0.037]  | 3.646<br>[-15.051, 22.344]   | 0.884<br>[0.881, 0.887] |
| Table                          | 0.018<br>[-0.013, 0.049]     | 0.008<br>[-0.021, 0.036]   | 0.015<br>[-0.008, 0.038]      | 0.027*<br>[-0.001, 0.056]  | 10.130<br>[-4.260, 24.519]   | 0.554<br>[0.550, 0.559] |
| Electric fan                   | 0.001<br>[-0.038, 0.039]     | 0.026*<br>[-0.005, 0.057]  | 0.016<br>[-0.012, 0.043]      | 0.026<br>[-0.009, 0.061]   | 0.792<br>[-15.535, 17.119]   | 0.782<br>[0.777, 0.786] |
| Black and white television     | 0.039<br>[-0.019, 0.097]     | 0.057**<br>[0.002, 0.112]  | 0.061**<br>[0.011, 0.110]     | 0.030<br>[-0.028, 0.089]   | -18.262<br>[-41.562, 5.038]  | 0.033<br>[0.032, 0.034] |
| Color television               | 0.024<br>[-0.009, 0.057]     | 0.009<br>[-0.020, 0.038]   | 0.020<br>[-0.004, 0.044]      | 0.021<br>[-0.011, 0.052]   | 8.384<br>[-6.283, 23.051]    | 0.635<br>[0.630, 0.640] |
| Sewing machine                 | 0.006<br>[-0.024, 0.037]     | -0.001<br>[-0.028, 0.027]  | 0.006<br>[-0.017, 0.029]      | 0.017<br>[-0.014, 0.048]   | 1.471<br>[-11.743, 14.684]   | 0.240<br>[0.237, 0.243] |
| Computer                       | 0.024<br>[-0.048, 0.096]     | 0.000<br>[-0.059, 0.059]   | 0.009<br>[-0.042, 0.060]      | 0.055*<br>[-0.008, 0.119]  | -2.331<br>[-26.620, 21.957]  | 0.090<br>[0.087, 0.093] |
| Air conditioner/cooler         | -0.013                       | -0.014                     | -0.018                        | 0.024                      | 10.214                       | 0.179                   |

|                                     |                  |                 |                  |                  |                     |                |
|-------------------------------------|------------------|-----------------|------------------|------------------|---------------------|----------------|
|                                     | [-0.054, 0.028]  | [-0.051, 0.023] | [-0.049, 0.012]  | [-0.017, 0.066]  | [-6.793, 27.221]    | [0.175, 0.183] |
| Washing machine                     | 0.038            | 0.026           | 0.038*           | 0.023            | 5.440               | 0.136          |
|                                     | [-0.017, 0.093]  | [-0.025, 0.077] | [-0.006, 0.081]  | [-0.030, 0.077]  | [-19.773, 30.653]   | [0.132, 0.140] |
| <b>d) Housing quality</b>           |                  |                 |                  |                  |                     |                |
| Residents per bedroom               | -0.017***        | 0.003           | -0.008***        | -0.002           | -0.606              | 2.917          |
|                                     | [-0.025, -0.009] | [-0.003, 0.009] | [-0.014, -0.003] | [-0.009, 0.005]  | [-3.937, 2.725]     | [2.905, 2.929] |
| Floor: cement                       | RC               | RC              | RC               | RC               | RC                  | 0.393          |
|                                     |                  |                 |                  |                  |                     | [0.388, 0.397] |
| Floor: mud/clay/earth               | -0.044**         | 0.010           | -0.015           | -0.006           | 1.953               | 0.271          |
|                                     | [-0.081, -0.006] | [-0.022, 0.042] | [-0.043, 0.013]  | [-0.043, 0.031]  | [-15.578, 19.483]   | [0.266, 0.276] |
| Floor: ceramic tiles                | -0.092***        | 0.039           | -0.019           | 0.026            | 13.057              | 0.106          |
|                                     | [-0.161, -0.022] | [-0.027, 0.105] | [-0.076, 0.038]  | [-0.034, 0.086]  | [-10.687, 36.802]   | [0.102, 0.110] |
| Floor: carpet                       | -0.061           | -0.019          | -0.039           | -0.146           | -15.771             | 0.006          |
|                                     | [-0.209, 0.088]  | [-0.183, 0.146] | [-0.142, 0.065]  | [-0.331, 0.039]  | [-102.149, 70.606]  | [0.005, 0.006] |
| Floor: polished stone/marble/grani. | 0.018            | 0.050           | 0.046*           | 0.023            | 18.662              | 0.077          |
|                                     | [-0.045, 0.081]  | [-0.012, 0.113] | [-0.003, 0.095]  | [-0.041, 0.088]  | [-5.087, 42.411]    | [0.074, 0.080] |
| Floor: other                        | 0.263            | 0.146           | 0.249*           | 0.111            | -20.933             | 0.001          |
|                                     | [-0.083, 0.610]  | [-0.158, 0.449] | [-0.033, 0.531]  | [-0.179, 0.402]  | [-224.569, 182.703] | [0.001, 0.001] |
| Floor: sand                         | -0.080           | -0.070          | -0.091*          | 0.082            | -31.791             | 0.007          |
|                                     | [-0.198, 0.039]  | [-0.179, 0.038] | [-0.186, 0.004]  | [-0.026, 0.190]  | [-79.959, 16.376]   | [0.007, 0.007] |
| Floor: dung                         | -0.026           | 0.012           | -0.007           | -0.048**         | 4.067               | 0.070          |
|                                     | [-0.073, 0.020]  | [-0.028, 0.052] | [-0.041, 0.027]  | [-0.095, -0.001] | [-18.964, 27.099]   | [0.068, 0.072] |
| Floor: raw wood planks              | 0.050            | 0.090           | 0.094            | 0.166*           | 4.058               | 0.002          |
|                                     | [-0.137, 0.236]  | [-0.066, 0.246] | [-0.054, 0.242]  | [-0.017, 0.350]  | [-61.680, 69.796]   | [0.002, 0.003] |
| Floor: palm/bamboo                  | -0.014           | -0.047          | -0.060           | 0.038            | 2.881               | 0.002          |
|                                     | [-0.284, 0.255]  | [-0.276, 0.183] | [-0.295, 0.174]  | [-0.281, 0.357]  | [-123.785, 129.548] | [0.002, 0.002] |
| Floor: brick                        | -0.075           | -0.067          | -0.085**         | 0.016            | 17.350              | 0.008          |
|                                     | [-0.192, 0.043]  | [-0.160, 0.027] | [-0.163, -0.008] | [-0.095, 0.126]  | [-34.337, 69.037]   | [0.007, 0.008] |
| Floor: stone                        | -0.029           | 0.070**         | 0.030            | 0.054            | 19.840              | 0.055          |
|                                     | [-0.096, 0.039]  | [0.013, 0.127]  | [-0.020, 0.080]  | [-0.013, 0.120]  | [-5.544, 45.224]    | [0.052, 0.057] |
| Floor: parquet/polished wood        | 0.060            | -0.129          | -0.034           | 0.125            | 45.346              | 0.002          |
|                                     | [-0.143, 0.264]  | [-0.335, 0.077] | [-0.206, 0.138]  | [-0.106, 0.356]  | [-66.758, 157.451]  | [0.002, 0.002] |
| Floor: vinyl/asphalt strips         | -0.288*          | -0.037          | -0.177*          | 0.038            | 57.670              | 0.002          |
|                                     | [-0.593, 0.018]  | [-0.351, 0.278] | [-0.365, 0.011]  | [-0.185, 0.262]  | [-21.395, 136.736]  | [0.001, 0.002] |
| Roof: RCC/RBC/cement/concrete       | RC               | RC              | RC               | RC               | RC                  | 0.413          |
|                                     |                  |                 |                  |                  |                     | [0.408, 0.419] |

|                                  |                            |                              |                              |                               |                               |                         |
|----------------------------------|----------------------------|------------------------------|------------------------------|-------------------------------|-------------------------------|-------------------------|
| Roof: no roof                    | 0.052<br>[-0.184, 0.287]   | -0.053<br>[-0.247, 0.141]    | -0.014<br>[-0.204, 0.177]    | 0.001<br>[-0.218, 0.219]      | -16.895<br>[-129.351, 95.561] | 0.002<br>[0.002, 0.002] |
| Roof: loosely packed stone       | -0.069<br>[-0.160, 0.021]  | -0.010<br>[-0.070, 0.051]    | -0.047<br>[-0.107, 0.013]    | 0.034<br>[-0.038, 0.105]      | 4.453<br>[-27.402, 36.307]    | 0.023<br>[0.022, 0.025] |
| Roof: metal/GI                   | -0.022<br>[-0.078, 0.034]  | -0.028<br>[-0.081, 0.025]    | -0.037<br>[-0.082, 0.007]    | -0.013<br>[-0.066, 0.040]     | 5.327<br>[-18.706, 29.359]    | 0.110<br>[0.106, 0.113] |
| Roof: wood                       | -0.058<br>[-0.166, 0.051]  | 0.010<br>[-0.080, 0.100]     | -0.021<br>[-0.098, 0.056]    | -0.011<br>[-0.110, 0.087]     | 17.993<br>[-28.101, 64.087]   | 0.012<br>[0.011, 0.012] |
| Roof: calamine/cement fiber      | -0.068<br>[-0.165, 0.029]  | 0.053<br>[-0.020, 0.126]     | -0.002<br>[-0.063, 0.059]    | -0.044<br>[-0.144, 0.055]     | 0.438<br>[-31.246, 32.122]    | 0.028<br>[0.027, 0.030] |
| Roof: asbestos sheets            | -0.025<br>[-0.084, 0.034]  | 0.014<br>[-0.042, 0.070]     | -0.010<br>[-0.056, 0.035]    | -0.004<br>[-0.059, 0.051]     | 1.401<br>[-24.441, 27.242]    | 0.076<br>[0.073, 0.078] |
| Roof: roofing shingles           | 0.020<br>[-0.071, 0.110]   | -0.048<br>[-0.128, 0.032]    | -0.020<br>[-0.091, 0.051]    | 0.032<br>[-0.045, 0.109]      | 8.944<br>[-25.718, 43.605]    | 0.020<br>[0.019, 0.021] |
| Roof: tiles                      | -0.039<br>[-0.096, 0.019]  | -0.029<br>[-0.080, 0.023]    | -0.042*<br>[-0.086, 0.002]   | -0.019<br>[-0.068, 0.031]     | -14.666<br>[-39.616, 10.284]  | 0.071<br>[0.068, 0.073] |
| Roof: slate                      | -0.020<br>[-0.071, 0.030]  | 0.019<br>[-0.026, 0.063]     | -0.001<br>[-0.040, 0.039]    | -0.001<br>[-0.054, 0.052]     | 13.441<br>[-10.016, 36.899]   | 0.081<br>[0.079, 0.084] |
| Roof: burnt brick                | -0.049*<br>[-0.102, 0.003] | 0.024<br>[-0.023, 0.072]     | -0.008<br>[-0.049, 0.033]    | 0.029<br>[-0.019, 0.078]      | 5.966<br>[-20.136, 32.069]    | 0.045<br>[0.043, 0.047] |
| Roof: thatch/palm leaf           | -0.002<br>[-0.062, 0.059]  | -0.004<br>[-0.055, 0.046]    | -0.003<br>[-0.048, 0.041]    | 0.022<br>[-0.033, 0.078]      | 33.242**<br>[4.666, 61.819]   | 0.045<br>[0.043, 0.046] |
| Roof: other                      | -0.052<br>[-0.147, 0.043]  | -0.088**<br>[-0.161, -0.016] | -0.085**<br>[-0.151, -0.018] | 0.006<br>[-0.084, 0.096]      | -28.984<br>[-70.971, 13.004]  | 0.029<br>[0.027, 0.031] |
| Roof: mud                        | -0.095<br>[-0.217, 0.027]  | 0.015<br>[-0.079, 0.110]     | -0.041<br>[-0.124, 0.042]    | 0.076<br>[-0.037, 0.190]      | 12.607<br>[-47.303, 72.517]   | 0.009<br>[0.008, 0.009] |
| Roof: sod/mud and grass mixture  | -0.080<br>[-0.190, 0.029]  | -0.005<br>[-0.090, 0.079]    | -0.042<br>[-0.126, 0.042]    | -0.159***<br>[-0.262, -0.057] | -36.618<br>[-82.202, 8.966]   | 0.009<br>[0.009, 0.010] |
| Roof: plastic/polythene sheeting | -0.098<br>[-0.221, 0.025]  | -0.087<br>[-0.211, 0.036]    | -0.115**<br>[-0.215, -0.016] | -0.055<br>[-0.167, 0.057]     | 13.807<br>[-38.723, 66.337]   | 0.008<br>[0.007, 0.008] |
| Roof: rustic mat                 | 0.231<br>[-0.058, 0.519]   | -0.062<br>[-0.312, 0.189]    | 0.103<br>[-0.103, 0.309]     | 0.025<br>[-0.233, 0.283]      | -45.663<br>[-177.336, 86.010] | 0.001<br>[0.001, 0.001] |
| Roof: palm/bamboo                | -0.026<br>[-0.145, 0.092]  | -0.019<br>[-0.110, 0.072]    | -0.030<br>[-0.112, 0.053]    | -0.022<br>[-0.123, 0.079]     | 5.465<br>[-49.489, 60.419]    | 0.007<br>[0.007, 0.008] |
| Roof: raw wood planks/timber     | -0.033<br>[-0.163, 0.097]  | -0.035<br>[-0.142, 0.072]    | -0.033<br>[-0.125, 0.059]    | -0.120*<br>[-0.249, 0.009]    | 31.433<br>[-20.792, 83.659]   | 0.006<br>[0.006, 0.007] |

|                                |                           |                           |                           |                               |                                   |                         |
|--------------------------------|---------------------------|---------------------------|---------------------------|-------------------------------|-----------------------------------|-------------------------|
| Roof: unburnt bricks           | -0.063<br>[-0.211, 0.085] | -0.009<br>[-0.165, 0.146] | -0.053<br>[-0.180, 0.074] | -0.093<br>[-0.242, 0.057]     | 5.688<br>[-58.356, 69.733]        | 0.005<br>[0.005, 0.005] |
| Wall: cement/concrete          | RC                        | RC                        | RC                        | RC                            | RC                                | 0.379<br>[0.373, 0.385] |
| Wall: no walls                 | -0.062<br>[-0.263, 0.138] | -0.055<br>[-0.238, 0.128] | -0.086<br>[-0.237, 0.064] | 0.041<br>[-0.127, 0.209]      | 99.848**<br>[20.626, 179.070]     | 0.003<br>[0.003, 0.004] |
| Wall: raw/reused wood          | 0.006<br>[-0.303, 0.316]  | 0.001<br>[-0.181, 0.184]  | -0.003<br>[-0.217, 0.210] | -0.127<br>[-0.301, 0.046]     | 17.414<br>[-96.158, 130.985]      | 0.003<br>[0.002, 0.003] |
| Wall: stone with lime/cement   | -0.015<br>[-0.084, 0.055] | 0.016<br>[-0.047, 0.080]  | 0.006<br>[-0.045, 0.056]  | -0.060*<br>[-0.126, 0.006]    | -26.893**<br>[-53.353, -0.434]    | 0.059<br>[0.057, 0.061] |
| Wall: burnt bricks             | -0.006<br>[-0.044, 0.033] | 0.010<br>[-0.025, 0.045]  | 0.001<br>[-0.028, 0.029]  | -0.029<br>[-0.067, 0.009]     | -11.415<br>[-27.526, 4.695]       | 0.252<br>[0.247, 0.257] |
| Wall: cement blocks            | 0.037<br>[-0.029, 0.102]  | -0.034<br>[-0.090, 0.022] | -0.003<br>[-0.051, 0.044] | -0.004<br>[-0.057, 0.049]     | -16.181<br>[-40.870, 8.509]       | 0.058<br>[0.055, 0.060] |
| Wall: wood planks/shingles     | -0.034<br>[-0.275, 0.207] | 0.052<br>[-0.135, 0.238]  | 0.018<br>[-0.146, 0.181]  | 0.024<br>[-0.195, 0.243]      | -60.982<br>[-158.149, 36.186]     | 0.002<br>[0.002, 0.002] |
| Wall: GI/metal/asbestos sheets | -0.025<br>[-0.207, 0.157] | 0.030<br>[-0.112, 0.172]  | 0.014<br>[-0.110, 0.137]  | -0.045<br>[-0.177, 0.086]     | 1.753<br>[-55.841, 59.346]        | 0.010<br>[0.009, 0.011] |
| Wall: other                    | -0.007<br>[-0.229, 0.216] | 0.033<br>[-0.158, 0.224]  | 0.030<br>[-0.135, 0.196]  | -0.019<br>[-0.248, 0.211]     | 24.219<br>[-150.831, 199.269]     | 0.002<br>[0.002, 0.002] |
| Wall: cane/palm/trunks         | 0.042<br>[-0.056, 0.139]  | -0.069<br>[-0.153, 0.016] | -0.027<br>[-0.104, 0.050] | 0.006<br>[-0.080, 0.093]      | 0.127<br>[-50.213, 50.467]        | 0.016<br>[0.015, 0.017] |
| Wall: mud                      | 0.031<br>[-0.017, 0.078]  | 0.007<br>[-0.035, 0.048]  | 0.019<br>[-0.016, 0.054]  | -0.062***<br>[-0.108, -0.015] | -20.032*<br>[-40.364, 0.300]      | 0.136<br>[0.132, 0.139] |
| Wall: grass/reeds/thatch       | -0.027<br>[-0.143, 0.088] | 0.037<br>[-0.051, 0.124]  | -0.007<br>[-0.090, 0.076] | -0.058<br>[-0.161, 0.045]     | -72.193***<br>[-122.172, -22.215] | 0.009<br>[0.008, 0.009] |
| Wall: bamboo with mud          | -0.049<br>[-0.124, 0.027] | -0.018<br>[-0.077, 0.041] | -0.042<br>[-0.096, 0.012] | -0.004<br>[-0.073, 0.064]     | -20.442<br>[-50.042, 9.158]       | 0.028<br>[0.027, 0.029] |
| Wall: stone with mud           | -0.047<br>[-0.140, 0.046] | -0.013<br>[-0.084, 0.058] | -0.029<br>[-0.092, 0.034] | -0.018<br>[-0.091, 0.055]     | -18.597<br>[-54.806, 17.612]      | 0.021<br>[0.020, 0.022] |
| Wall: plywood                  | 0.120<br>[-0.410, 0.649]  | 0.107<br>[-0.218, 0.432]  | 0.134<br>[-0.184, 0.453]  | -0.303**<br>[-0.601, -0.005]  | -41.081<br>[-179.819, 97.657]     | 0.001<br>[0.001, 0.001] |
| Wall: cardboard                | -0.041<br>[-0.371, 0.289] | 0.093<br>[-0.209, 0.394]  | 0.002<br>[-0.233, 0.237]  | 0.178<br>[-0.110, 0.465]      | 45.759<br>[-67.250, 158.769]      | 0.001<br>[0.001, 0.001] |
| Wall: unburnt brick            | -0.042<br>[-0.119, 0.035] | 0.075**<br>[0.006, 0.143] | 0.028<br>[-0.029, 0.086]  | -0.050<br>[-0.132, 0.031]     | -0.780<br>[-33.387, 31.827]       | 0.021<br>[0.020, 0.022] |

**e) Other**

|                                       |                               |                               |                               |                            |                                  |                         |
|---------------------------------------|-------------------------------|-------------------------------|-------------------------------|----------------------------|----------------------------------|-------------------------|
| Staff                                 | 0.284**<br>[0.011, 0.556]     | 0.056<br>[-0.168, 0.281]      | 0.169<br>[-0.036, 0.374]      | 0.026<br>[-0.247, 0.299]   | 39.868<br>[-50.306, 130.041]     | 0.002<br>[0.001, 0.002] |
| Bank account                          | 0.032*<br>[-0.004, 0.069]     | 0.013<br>[-0.019, 0.044]      | 0.027**<br>[0.001, 0.054]     | 0.044**<br>[0.008, 0.079]  | 11.490<br>[-5.562, 28.542]       | 0.895<br>[0.893, 0.897] |
| Electricity                           | 0.049**<br>[0.006, 0.091]     | 0.007<br>[-0.029, 0.042]      | 0.034**<br>[0.001, 0.066]     | 0.002<br>[-0.039, 0.044]   | -10.516<br>[-30.873, 9.841]      | 0.882<br>[0.879, 0.885] |
| Animal-drawn cart                     | 0.007<br>[-0.046, 0.060]      | 0.004<br>[-0.041, 0.050]      | 0.003<br>[-0.038, 0.043]      | -0.004<br>[-0.054, 0.045]  | -8.652<br>[-29.673, 12.368]      | 0.036<br>[0.035, 0.037] |
| Land usable for agriculture           | 0.014<br>[-0.013, 0.040]      | 0.042***<br>[0.020, 0.064]    | 0.039***<br>[0.019, 0.058]    | 0.011<br>[-0.015, 0.037]   | 5.943<br>[-5.929, 17.815]        | 0.389<br>[0.384, 0.394] |
| Internet                              | -0.022<br>[-0.075, 0.031]     | 0.051**<br>[0.002, 0.100]     | 0.025<br>[-0.015, 0.065]      | -0.003<br>[-0.052, 0.046]  | 24.178**<br>[3.309, 45.048]      | 0.109<br>[0.106, 0.112] |
| Thresher                              | 0.021<br>[-0.063, 0.105]      | -0.149***<br>[-0.222, -0.076] | -0.090***<br>[-0.152, -0.028] | 0.058<br>[-0.020, 0.136]   | 13.064<br>[-24.512, 50.640]      | 0.015<br>[0.014, 0.015] |
| Tractor                               | 0.019<br>[-0.043, 0.081]      | 0.057**<br>[0.005, 0.109]     | 0.048**<br>[0.003, 0.094]     | -0.044<br>[-0.104, 0.017]  | -6.686<br>[-34.235, 20.863]      | 0.025<br>[0.024, 0.025] |
| Household member owns a house         | -0.028<br>[-0.065, 0.009]     | 0.007<br>[-0.024, 0.039]      | -0.010<br>[-0.037, 0.016]     | 0.004<br>[-0.028, 0.037]   | 4.846<br>[-9.227, 18.919]        | 0.798<br>[0.794, 0.803] |
| <b>Covariates</b>                     |                               |                               |                               |                            |                                  |                         |
| Birth interval (months)               | 0.004***<br>[0.004, 0.005]    | 0.001**<br>[0.000, 0.001]     | 0.003***<br>[0.002, 0.003]    | 0.001***<br>[0.000, 0.002] | 0.541***<br>[0.250, 0.831]       |                         |
| Birth order                           | -0.118***<br>[-0.144, -0.093] | -0.075***<br>[-0.095, -0.054] | -0.103***<br>[-0.121, -0.085] | 0.009<br>[-0.013, 0.031]   | 8.619<br>[-3.567, 20.805]        |                         |
| Age (months)                          | -0.019***<br>[-0.020, -0.018] | 0.001***<br>[0.001, 0.002]    | -0.009***<br>[-0.009, -0.008] | 0.022***<br>[0.022, 0.023] | 0.376***<br>[0.091, 0.660]       |                         |
| Female                                | 0.073***<br>[0.052, 0.093]    | 0.049***<br>[0.032, 0.066]    | 0.022***<br>[0.008, 0.037]    | 0.008<br>[-0.010, 0.027]   | -62.688***<br>[-70.772, -54.604] |                         |
| First born                            | 0.197***<br>[0.160, 0.233]    | 0.030*<br>[-0.001, 0.061]     | 0.131***<br>[0.104, 0.157]    | 0.089***<br>[0.054, 0.124] | -2.986<br>[-19.251, 13.279]      |                         |
| Delivered at home                     | -0.020<br>[-0.046, 0.007]     | -0.034***<br>[-0.055, -0.012] | -0.038***<br>[-0.058, -0.019] | 0.009<br>[-0.017, 0.035]   | -43.773***<br>[-62.492, -25.053] |                         |
| Mother's age at birth (years)         | 0.057***<br>[0.040, 0.074]    | 0.013*<br>[-0.001, 0.028]     | 0.043***<br>[0.030, 0.056]    | 0.009<br>[-0.007, 0.025]   | 19.696***<br>[12.015, 27.376]    |                         |
| Mother's age at birth (years) squared | -0.001***<br>[-0.001, -0.001] | -0.000*<br>[-0.000, 0.000]    | -0.001***<br>[-0.001, -0.000] | -0.000<br>[-0.000, 0.000]  | -0.363***<br>[-0.504, -0.222]    |                         |

|                                   |                 |                 |                 |                  |                   |
|-----------------------------------|-----------------|-----------------|-----------------|------------------|-------------------|
| Maternal height (z-score)         | 0.274***        | 0.046***        | 0.193***        | 0.019***         | 51.476***         |
|                                   | [0.261, 0.286]  | [0.036, 0.056]  | [0.184, 0.203]  | [0.008, 0.029]   | [46.611, 56.341]  |
| Received no vaccination           | 0.125***        | -0.004          | 0.062***        | -0.009           |                   |
|                                   | [0.081, 0.170]  | [-0.041, 0.033] | [0.027, 0.097]  | [-0.050, 0.032]  |                   |
| Siblings ever born                | 0.093***        | 0.071***        | 0.084***        | -0.023**         | 14.513***         |
|                                   | [0.070, 0.117]  | [0.052, 0.091]  | [0.067, 0.101]  | [-0.043, -0.002] | [3.564, 25.462]   |
| Mother's education: none          | RC              | RC              | RC              | RC               | RC                |
| Mother's education: primary       | 0.050***        | 0.032**         | 0.054***        | 0.041**          | -6.659            |
|                                   | [0.016, 0.085]  | [0.003, 0.061]  | [0.030, 0.078]  | [0.009, 0.073]   | [-22.288, 8.970]  |
| Mother's education: secondary     | 0.126***        | 0.025*          | 0.089***        | 0.086***         | 16.727**          |
|                                   | [0.096, 0.156]  | [-0.000, 0.051] | [0.068, 0.111]  | [0.057, 0.114]   | [2.930, 30.523]   |
| Mother's education: higher        | 0.243***        | 0.099***        | 0.210***        | 0.188***         | 50.381***         |
|                                   | [0.188, 0.299]  | [0.050, 0.148]  | [0.170, 0.250]  | [0.139, 0.236]   | [29.483, 71.279]  |
| Wealth quintile: first            | RC              | RC              | RC              | RC               | RC                |
| Wealth quintile: second           | -0.008          | -0.007          | -0.009          | -0.036           | 5.643             |
|                                   | [-0.055, 0.039] | [-0.047, 0.033] | [-0.044, 0.026] | [-0.081, 0.009]  | [-16.424, 27.711] |
| Wealth quintile: third            | 0.013           | -0.002          | 0.013           | -0.087**         | 22.488            |
|                                   | [-0.064, 0.090] | [-0.069, 0.065] | [-0.045, 0.071] | [-0.161, -0.013] | [-12.820, 57.796] |
| Wealth quintile: fourth           | -0.016          | 0.026           | 0.019           | -0.072           | 5.228             |
|                                   | [-0.125, 0.092] | [-0.069, 0.121] | [-0.062, 0.099] | [-0.176, 0.032]  | [-43.347, 53.803] |
| Wealth quintile: fifth            | -0.024          | 0.034           | 0.018           | -0.095           | 10.286            |
|                                   | [-0.167, 0.118] | [-0.090, 0.158] | [-0.087, 0.123] | [-0.229, 0.038]  | [-51.712, 72.284] |
| Caste/tribe: schedule caste       | RC              | RC              | RC              | RC               | RC                |
| Caste/tribe: schedule tribe       | -0.012          | -0.026          | -0.027          | -0.084***        | -19.740*          |
|                                   | [-0.066, 0.042] | [-0.074, 0.021] | [-0.068, 0.014] | [-0.135, -0.033] | [-42.758, 3.279]  |
| Caste/tribe: other backward class | 0.058***        | 0.010           | 0.040***        | 0.055***         | 4.539             |
|                                   | [0.024, 0.091]  | [-0.019, 0.039] | [0.016, 0.065]  | [0.025, 0.085]   | [-9.495, 18.573]  |
| Caste/tribe: none of them         | 0.141***        | 0.063***        | 0.123***        | 0.041*           | 17.672*           |
|                                   | [0.094, 0.188]  | [0.024, 0.102]  | [0.089, 0.156]  | [-0.000, 0.081]  | [-0.563, 35.907]  |
| Caste/tribe: don't know           | 0.110           | -0.012          | 0.048           | -0.162**         | 8.811             |
|                                   | [-0.075, 0.294] | [-0.143, 0.119] | [-0.079, 0.174] | [-0.324, -0.001] | [-71.006, 88.627] |
| Singleton birth                   | RC              | RC              | RC              | RC               | RC                |

|                              |                  |                  |                  |                  |                      |         |
|------------------------------|------------------|------------------|------------------|------------------|----------------------|---------|
| First born twin/triplet etc. | -0.315***        | -0.265***        | -0.368***        | -0.303***        | -648.818***          |         |
|                              | [-0.430, -0.200] | [-0.355, -0.175] | [-0.455, -0.280] | [-0.416, -0.190] | [-717.033, -580.602] |         |
| Later born twin/triplet etc. | -0.278***        | -0.245***        | -0.348***        | -0.249***        | -690.345***          |         |
|                              | [-0.405, -0.151] | [-0.342, -0.148] | [-0.447, -0.249] | [-0.378, -0.120] | [-753.738, -626.952] |         |
| Observations                 | 204,238          | 204,238          | 204,238          | 191,324          | 172,831              | 601,509 |

Notes: \*\*\* p<0.01, \*\* p<0.05, \* p<0.1. All estimates are weighted and tests for statistical significance and 95% confidence intervals (shown in brackets) were calculated using robust standard errors. All estimates in each column were obtained from a single model. Control variables: sex, age, maternal age at birth, birth order, birth interval, firstborn, twin, vaccination status (except for mortality and low birth weight), born at home, maternal education, caste/tribe, and wealth index quintiles. Models were further adjusted for unobserved PSU-level factors. Proportions are for all households interviewed. Acronyms and abbreviations: liquefied petroleum gas (LPG), reinforced cement concrete (RCC), reinforced brick concrete (RBC), galvanized iron (GI), granite (grani.), shared (sh.), sewer system (sewer s.), without (w/o), with(w/), reverse osmosis (RO), reference category (RC).

Table A7. Results from conditional Poisson models. Missing outcomes and covariates imputed. District fixed effects

|                                       | Stunting                   | Underweight                | Wasting                    | Anemia                     | Diarrhea                   | Low birth weight           | Mortality                  | Proportion (households) |
|---------------------------------------|----------------------------|----------------------------|----------------------------|----------------------------|----------------------------|----------------------------|----------------------------|-------------------------|
| <b>a) Water and toilet facilities</b> |                            |                            |                            |                            |                            |                            |                            |                         |
| Water pump                            | 0.977**<br>[0.958, 0.997]  | 0.989<br>[0.966, 1.012]    | 0.999<br>[0.968, 1.030]    | 1.001<br>[0.976, 1.027]    | 1.008<br>[0.958, 1.061]    | 0.944**<br>[0.894, 0.997]  | 0.950<br>[0.891, 1.012]    | 0.172<br>[0.169, 0.176] |
| Toilet: no facility/bush/field        | RC                         | 0.389<br>[0.383, 0.395] |
| Toilet: flush to piped sewer system   | 0.942***<br>[0.905, 0.980] | 0.982<br>[0.936, 1.031]    | 0.992<br>[0.945, 1.042]    | 0.963<br>[0.912, 1.017]    | 0.943<br>[0.856, 1.039]    | 0.917***<br>[0.864, 0.974] | 0.734***<br>[0.630, 0.856] | 0.078<br>[0.074, 0.083] |
| Toilet: composting toilet             | 1.046<br>[0.674, 1.623]    | 1.122<br>[0.805, 1.564]    | 1.291<br>[0.940, 1.772]    | 0.990<br>[0.817, 1.200]    | 0.930<br>[0.478, 1.810]    | 0.842<br>[0.530, 1.338]    | 0.675<br>[0.223, 2.045]    | 0.001<br>[0.001, 0.001] |
| Toilet: dry toilet                    | 0.834<br>[0.661, 1.051]    | 0.842*<br>[0.698, 1.016]   | 1.046<br>[0.851, 1.286]    | 0.933<br>[0.841, 1.034]    | 1.108<br>[0.756, 1.623]    | 1.289**<br>[1.063, 1.563]  | 1.236<br>[0.810, 1.885]    | 0.004<br>[0.003, 0.004] |
| Toilet: other                         | 1.035<br>[0.819, 1.307]    | 0.986<br>[0.806, 1.206]    | 1.075<br>[0.755, 1.529]    | 1.069<br>[0.955, 1.197]    | 0.750<br>[0.365, 1.544]    | 1.070<br>[0.744, 1.540]    | 0.146<br>[0.011, 2.032]    | 0.001<br>[0.001, 0.001] |
| Toilet: sh. Flush to piped sewer s.   | 1.078***<br>[1.021, 1.137] | 1.093*<br>[0.977, 1.223]   | 0.929<br>[0.844, 1.021]    | 1.043<br>[0.990, 1.098]    | 0.996<br>[0.866, 1.146]    | 0.947<br>[0.873, 1.027]    | 1.163<br>[0.931, 1.453]    | 0.012<br>[0.010, 0.013] |
| Toilet: shared flush to septic tank   | 0.964**<br>[0.933, 0.996]  | 0.986<br>[0.945, 1.030]    | 0.941***<br>[0.899, 0.984] | 0.985<br>[0.967, 1.003]    | 1.098***<br>[1.027, 1.175] | 1.034<br>[0.968, 1.104]    | 1.063<br>[0.958, 1.179]    | 0.054<br>[0.052, 0.057] |
| Toilet: shared flush to pit latrine   | 0.969<br>[0.921, 1.019]    | 0.951*<br>[0.898, 1.007]   | 0.934<br>[0.810, 1.078]    | 0.980<br>[0.943, 1.018]    | 1.014<br>[0.886, 1.161]    | 0.945<br>[0.864, 1.033]    | 1.157*<br>[0.983, 1.363]   | 0.014<br>[0.013, 0.015] |
| Toilet: sh. Flush to somewhere else   | 0.834**<br>[0.720, 0.965]  | 1.098<br>[0.859, 1.404]    | 1.298**<br>[1.024, 1.646]  | 0.867***<br>[0.812, 0.926] | 1.256**<br>[1.009, 1.563]  | 1.422***<br>[1.222, 1.654] | 1.378<br>[0.912, 2.082]    | 0.004<br>[0.003, 0.005] |
| Toilet: sh. Flush don't know where    | 0.970<br>[0.748, 1.256]    | 1.119<br>[0.914, 1.370]    | 1.567**<br>[1.080, 2.275]  | 1.084<br>[0.924, 1.271]    | 0.305<br>[0.048, 1.923]    | 0.676<br>[0.377, 1.213]    | 1.367<br>[0.687, 2.723]    | 0.000<br>[0.000, 0.000] |
| Toilet: sh. Ventilated improved pit   | 0.915<br>[0.769, 1.089]    | 0.797*<br>[0.622, 1.020]   | 0.854<br>[0.566, 1.288]    | 1.091**<br>[1.010, 1.179]  | 0.857<br>[0.517, 1.419]    | 1.110<br>[0.867, 1.421]    | 1.035<br>[0.577, 1.854]    | 0.001<br>[0.001, 0.002] |
| Toilet: shared pit latrine w/ slab    | 1.031<br>[0.924, 1.151]    | 1.077<br>[0.961, 1.208]    | 0.961<br>[0.863, 1.070]    | 0.971<br>[0.889, 1.060]    | 0.924<br>[0.731, 1.169]    | 1.046<br>[0.946, 1.157]    | 0.998<br>[0.779, 1.279]    | 0.009<br>[0.009, 0.010] |
| Toilet: flush to septic tank          | 0.945***<br>[0.922, 0.967] | 0.949***<br>[0.926, 0.972] | 0.986<br>[0.932, 1.042]    | 0.964***<br>[0.951, 0.977] | 0.937**<br>[0.891, 0.985]  | 0.958*<br>[0.909, 1.009]   | 0.868***<br>[0.800, 0.942] | 0.287<br>[0.283, 0.292] |
| Toilet: sh. Pit w/o slab/open pit     | 1.135*<br>[0.977, 1.318]   | 1.122*<br>[0.979, 1.285]   | 0.995<br>[0.794, 1.247]    | 1.015<br>[0.914, 1.127]    | 1.639***<br>[1.192, 2.255] | 1.122<br>[0.860, 1.463]    | 1.063<br>[0.745, 1.519]    | 0.003<br>[0.003, 0.003] |
| Toilet: shared composting toilet      | 1.210<br>[0.922, 1.588]    | 1.179<br>[0.922, 1.507]    | 0.431*<br>[0.179, 1.038]   | 0.806<br>[0.430, 1.510]    | 0.304<br>[0.038, 2.453]    | 0.587<br>[0.262, 1.312]    | 1.222<br>[0.507, 2.944]    | 0.000<br>[0.000, 0.001] |
| Toilet: shared dry toilet             | 0.925                      | 0.869                      | 0.669**                    | 0.997                      | 0.660                      | 0.801                      | 0.836                      | 0.001                   |

|                                   |                |                |                |                |                |                |                |                |
|-----------------------------------|----------------|----------------|----------------|----------------|----------------|----------------|----------------|----------------|
|                                   | [0.687, 1.244] | [0.709, 1.065] | [0.467, 0.959] | [0.902, 1.101] | [0.349, 1.250] | [0.516, 1.243] | [0.426, 1.644] | [0.001, 0.001] |
| Toilet: shared other              | 0.728***       | 1.196***       | 1.645***       | 1.155***       | 0.597          | 1.071          | 1.120          | 0.002          |
|                                   | [0.611, 0.866] | [1.077, 1.327] | [1.455, 1.860] | [1.073, 1.243] | [0.310, 1.149] | [0.832, 1.381] | [0.663, 1.895] | [0.001, 0.002] |
| Toilet: flush to pit latrine      | 0.966          | 0.985          | 0.945*         | 0.976**        | 0.978          | 0.962          | 0.870**        | 0.072          |
|                                   | [0.925, 1.008] | [0.931, 1.042] | [0.888, 1.005] | [0.955, 0.998] | [0.904, 1.059] | [0.905, 1.022] | [0.767, 0.987] | [0.070, 0.074] |
| Toilet: flush to somewhere else   | 0.929          | 0.923*         | 0.916          | 0.943**        | 0.835*         | 0.915          | 0.918          | 0.009          |
|                                   | [0.841, 1.027] | [0.842, 1.012] | [0.821, 1.021] | [0.895, 0.994] | [0.684, 1.019] | [0.822, 1.018] | [0.708, 1.191] | [0.008, 0.010] |
| Toilet: flush don't know where    | 1.220**        | 0.780*         | 0.818          | 1.073          | 1.332          | 1.158          | 0.963          | 0.001          |
|                                   | [1.001, 1.487] | [0.580, 1.048] | [0.610, 1.096] | [0.932, 1.235] | [0.901, 1.967] | [0.883, 1.517] | [0.520, 1.783] | [0.001, 0.001] |
| Toilet: ventilated improved pit   | 0.900          | 0.824***       | 0.742***       | 0.970          | 1.065          | 1.018          | 1.221          | 0.006          |
|                                   | [0.793, 1.023] | [0.732, 0.927] | [0.634, 0.868] | [0.863, 1.091] | [0.878, 1.291] | [0.864, 1.199] | [0.954, 1.564] | [0.005, 0.006] |
| Toilet: pit latrine with slab     | 0.977          | 0.943**        | 0.911***       | 0.952***       | 1.033          | 0.959          | 1.019          | 0.039          |
|                                   | [0.935, 1.021] | [0.901, 0.987] | [0.855, 0.970] | [0.924, 0.980] | [0.919, 1.160] | [0.899, 1.021] | [0.874, 1.188] | [0.038, 0.041] |
| Toilet: pit without slab/open pit | 1.022          | 1.008          | 1.023          | 0.926*         | 1.101          | 1.038          | 0.841          | 0.011          |
|                                   | [0.943, 1.107] | [0.930, 1.091] | [0.899, 1.164] | [0.850, 1.008] | [0.866, 1.401] | [0.876, 1.229] | [0.643, 1.099] | [0.011, 0.012] |
| Water: tube well or borehole      | RC             | 0.392          |
|                                   |                |                |                |                |                |                |                | [0.386, 0.399] |
| Water: piped into dwelling        | 0.986          | 1.011          | 1.029          | 1.005          | 0.946          | 1.036          | 0.880**        | 0.166          |
|                                   | [0.958, 1.015] | [0.980, 1.043] | [0.984, 1.076] | [0.983, 1.028] | [0.883, 1.014] | [0.989, 1.085] | [0.792, 0.977] | [0.161, 0.171] |
| Water: rainwater                  | 0.992          | 0.783**        | 0.799*         | 0.832          | 1.083          | 0.754          | 0.881          | 0.002          |
|                                   | [0.845, 1.164] | [0.636, 0.963] | [0.617, 1.033] | [0.665, 1.043] | [0.737, 1.591] | [0.480, 1.186] | [0.322, 2.409] | [0.001, 0.002] |
| Water: tanker truck               | 1.002          | 0.952          | 0.921          | 0.969*         | 0.962          | 1.048          | 1.037          | 0.013          |
|                                   | [0.941, 1.066] | [0.844, 1.072] | [0.831, 1.021] | [0.937, 1.003] | [0.810, 1.143] | [0.912, 1.204] | [0.823, 1.305] | [0.011, 0.016] |
| Water: cart with small tank       | 0.900          | 0.872          | 0.986          | 0.941          | 1.015          | 1.000          | 1.549          | 0.002          |
|                                   | [0.681, 1.190] | [0.680, 1.119] | [0.774, 1.256] | [0.827, 1.070] | [0.670, 1.538] | [0.768, 1.302] | [0.901, 2.663] | [0.001, 0.002] |
| Water: bottled water              | 0.958*         | 0.977          | 0.942          | 1.016          | 1.073          | 0.947*         | 0.831**        | 0.031          |
|                                   | [0.917, 1.002] | [0.904, 1.056] | [0.858, 1.035] | [0.966, 1.069] | [0.967, 1.190] | [0.888, 1.009] | [0.710, 0.973] | [0.029, 0.033] |
| Water: community RO plant         | 0.919*         | 0.887**        | 1.051          | 1.039          | 1.098          | 1.047          | 1.138          | 0.005          |
|                                   | [0.832, 1.015] | [0.795, 0.991] | [0.890, 1.242] | [0.986, 1.095] | [0.907, 1.330] | [0.885, 1.240] | [0.851, 1.521] | [0.005, 0.006] |
| Water: other                      | 0.956          | 0.997          | 0.907          | 1.022          | 1.344          | 0.896          | 1.305          | 0.002          |
|                                   | [0.756, 1.210] | [0.770, 1.291] | [0.683, 1.203] | [0.913, 1.144] | [0.915, 1.975] | [0.610, 1.316] | [0.738, 2.306] | [0.001, 0.002] |
| Water: piped to yard/plot         | 1.012          | 0.998          | 1.009          | 0.975***       | 1.002          | 0.999          | 1.002          | 0.136          |
|                                   | [0.983, 1.042] | [0.972, 1.025] | [0.969, 1.050] | [0.959, 0.991] | [0.936, 1.071] | [0.954, 1.046] | [0.913, 1.100] | [0.132, 0.139] |
| Water: public tap/standpipe       | 1.017          | 1.014          | 0.998          | 1.008          | 1.026          | 1.013          | 1.041          | 0.159          |
|                                   | [0.995, 1.040] | [0.992, 1.036] | [0.963, 1.034] | [0.992, 1.025] | [0.962, 1.095] | [0.968, 1.060] | [0.961, 1.128] | [0.155, 0.163] |
| Water: protected well             | 1.022          | 0.969          | 0.953          | 1.032          | 1.041          | 1.040          | 0.869          | 0.037          |

|                                        |                |                |                |                |                |                |                 |                |
|----------------------------------------|----------------|----------------|----------------|----------------|----------------|----------------|-----------------|----------------|
| Water: unprotected well                | [0.974, 1.074] | [0.911, 1.031] | [0.875, 1.037] | [0.993, 1.071] | [0.898, 1.207] | [0.950, 1.138] | [0.704, 1.072]  | [0.034, 0.039] |
|                                        | 1.002          | 0.987          | 1.004          | 0.998          | 1.023          | 1.008          | 0.986           | 0.042          |
| Water: protected spring                | [0.971, 1.033] | [0.957, 1.018] | [0.955, 1.055] | [0.975, 1.022] | [0.931, 1.124] | [0.943, 1.077] | [0.882, 1.102]  | [0.041, 0.044] |
|                                        | 0.979          | 0.964          | 0.990          | 0.999          | 1.064          | 1.099          | 0.850           | 0.003          |
| Water: unprotected spring              | [0.764, 1.254] | [0.747, 1.245] | [0.702, 1.397] | [0.859, 1.161] | [0.595, 1.904] | [0.792, 1.525] | [0.362, 1.995]  | [0.003, 0.004] |
|                                        | 0.949          | 0.922          | 0.916          | 0.991          | 0.934          | 1.102          | 0.861           | 0.004          |
| Water: river/dam/lake/ponds etc.       | [0.819, 1.100] | [0.798, 1.065] | [0.719, 1.166] | [0.878, 1.118] | [0.578, 1.508] | [0.886, 1.369] | [0.484, 1.533]  | [0.004, 0.004] |
|                                        | 0.942          | 0.940          | 1.035          | 0.940          | 1.020          | 0.850          | 0.891           | 0.007          |
|                                        | [0.814, 1.091] | [0.843, 1.049] | [0.884, 1.213] | [0.845, 1.046] | [0.706, 1.473] | [0.692, 1.045] | [0.629, 1.263]  | [0.006, 0.007] |
| <b>b) Food storage and preparation</b> |                |                |                |                |                |                |                 |                |
| Refrigerator                           | 0.957***       | 0.946***       | 0.933***       | 0.994          | 1.022          | 0.970*         | 0.962           | 0.296          |
|                                        | [0.933, 0.980] | [0.924, 0.969] | [0.903, 0.964] | [0.978, 1.010] | [0.967, 1.080] | [0.935, 1.006] | [0.879, 1.053]  | [0.291, 0.302] |
| Pressure cooker                        | 0.970***       | 0.965**        | 0.975*         | 0.987**        | 1.019          | 0.979          | 0.970           | 0.566          |
|                                        | [0.952, 0.989] | [0.936, 0.995] | [0.946, 1.004] | [0.976, 0.998] | [0.972, 1.069] | [0.951, 1.009] | [0.913, 1.030]  | [0.561, 0.572] |
| Cooking: wood                          | RC              | 0.405          |
|                                        |                |                |                |                |                |                |                 | [0.399, 0.411] |
| Cooking: electricity                   | 1.038          | 0.899          | 0.876          | 0.967          | 1.092          | 0.917          | 1.243           | 0.006          |
|                                        | [0.889, 1.211] | [0.786, 1.028] | [0.723, 1.061] | [0.902, 1.036] | [0.851, 1.401] | [0.765, 1.099] | [0.896, 1.723]  | [0.006, 0.007] |
| Cooking: animal dung                   | 0.993          | 0.996          | 0.949**        | 1.005          | 1.085***       | 0.990          | 0.989           | 0.072          |
|                                        | [0.973, 1.013] | [0.973, 1.018] | [0.910, 0.990] | [0.987, 1.023] | [1.022, 1.153] | [0.949, 1.032] | [0.921, 1.061]  | [0.069, 0.074] |
| Cooking: no food cooked in house       | 1.642***       | 1.648***       | 1.383          | 1.051          | 1.573          | 0.124*         | 1.517           | 0.003          |
|                                        | [1.206, 2.235] | [1.329, 2.044] | [0.916, 2.088] | [0.878, 1.259] | [0.419, 5.909] | [0.012, 1.284] | [0.275, 8.351]  | [0.002, 0.003] |
| Cooking: other                         | 1.109          | 1.111          | 0.816          | 1.034          | 0.722          | 0.662          | 0.301           | 0.000          |
|                                        | [0.783, 1.570] | [0.727, 1.699] | [0.336, 1.984] | [0.778, 1.374] | [0.260, 2.005] | [0.346, 1.268] | [0.008, 10.752] | [0.000, 0.001] |
| Cooking: LPG/natural gas               | 0.963***       | 0.962*         | 0.977          | 1.003          | 1.037          | 0.963          | 0.977           | 0.423          |
|                                        | [0.940, 0.988] | [0.915, 1.011] | [0.941, 1.014] | [0.989, 1.017] | [0.983, 1.094] | [0.917, 1.012] | [0.902, 1.059]  | [0.416, 0.430] |
| Cooking: biogas                        | 1.002          | 0.955          | 0.898*         | 1.065**        | 0.774**        | 0.969          | 1.174           | 0.008          |
|                                        | [0.877, 1.145] | [0.869, 1.048] | [0.792, 1.019] | [1.013, 1.121] | [0.605, 0.988] | [0.868, 1.081] | [0.885, 1.557]  | [0.007, 0.009] |
| Cooking: kerosene                      | 0.996          | 1.011          | 0.967          | 0.974          | 0.911          | 1.121***       | 0.999           | 0.012          |
|                                        | [0.942, 1.052] | [0.871, 1.175] | [0.878, 1.066] | [0.939, 1.011] | [0.768, 1.081] | [1.031, 1.220] | [0.788, 1.266]  | [0.011, 0.013] |
| Cooking: coal, lignite                 | 1.002          | 1.032          | 1.109**        | 0.986          | 1.251**        | 0.946          | 1.028           | 0.009          |
|                                        | [0.936, 1.072] | [0.954, 1.116] | [1.006, 1.223] | [0.953, 1.021] | [1.040, 1.505] | [0.847, 1.057] | [0.781, 1.352]  | [0.008, 0.010] |
| Cooking: charcoal                      | 0.987          | 1.083**        | 0.975          | 1.049          | 0.970          | 0.941          | 1.122           | 0.006          |
|                                        | [0.895, 1.088] | [1.017, 1.153] | [0.878, 1.082] | [0.970, 1.134] | [0.764, 1.230] | [0.649, 1.364] | [0.876, 1.437]  | [0.005, 0.006] |
| Cooking: straw/shrubs/grass            | 1.054*         | 1.023          | 0.983          | 1.000          | 1.027          | 1.019          | 1.025           | 0.025          |
|                                        | [0.999, 1.111] | [0.993, 1.054] | [0.943, 1.024] | [0.980, 1.019] | [0.956, 1.103] | [0.963, 1.078] | [0.921, 1.141]  | [0.024, 0.027] |

|                                |                |                |                |                |                |                |                |                |
|--------------------------------|----------------|----------------|----------------|----------------|----------------|----------------|----------------|----------------|
| Cooking: agricultural crop     | 1.025*         | 1.041***       | 1.033          | 1.011          | 1.063          | 0.981          | 0.949          | 0.030          |
|                                | [0.998, 1.051] | [1.015, 1.068] | [0.984, 1.084] | [0.947, 1.079] | [0.974, 1.159] | [0.922, 1.043] | [0.857, 1.051] | [0.028, 0.032] |
| <b>c) Other consumer goods</b> |                |                |                |                |                |                |                |                |
| Radio                          | 0.970*         | 0.993          | 1.003          | 1.012          | 0.991          | 1.040*         | 0.981          | 0.081          |
|                                | [0.939, 1.001] | [0.967, 1.020] | [0.969, 1.038] | [0.997, 1.028] | [0.935, 1.049] | [0.995, 1.088] | [0.897, 1.073] | [0.080, 0.083] |
| Bicycle                        | 0.985**        | 0.993          | 1.024**        | 0.988***       | 0.954***       | 1.014          | 0.976          | 0.521          |
|                                | [0.973, 0.996] | [0.980, 1.006] | [1.003, 1.044] | [0.979, 0.996] | [0.923, 0.985] | [0.993, 1.036] | [0.930, 1.024] | [0.516, 0.526] |
| Motorcycle/scooter             | 0.959**        | 0.966***       | 0.978*         | 0.984*         | 0.937***       | 0.968**        | 0.906***       | 0.377          |
|                                | [0.926, 0.994] | [0.950, 0.981] | [0.954, 1.002] | [0.967, 1.001] | [0.900, 0.975] | [0.944, 0.994] | [0.854, 0.961] | [0.372, 0.381] |
| Car/truck                      | 0.949**        | 0.938**        | 0.956          | 0.993          | 0.862***       | 0.995          | 0.999          | 0.060          |
|                                | [0.902, 0.999] | [0.884, 0.995] | [0.901, 1.015] | [0.947, 1.041] | [0.790, 0.941] | [0.944, 1.049] | [0.866, 1.152] | [0.058, 0.063] |
| Telephone (land-line)          | 0.963          | 1.021          | 1.140**        | 0.973          | 0.955          | 0.987          | 0.956          | 0.039          |
|                                | [0.909, 1.021] | [0.960, 1.085] | [1.010, 1.287] | [0.895, 1.059] | [0.861, 1.060] | [0.915, 1.064] | [0.774, 1.181] | [0.037, 0.041] |
| Mobile telephone               | 0.974**        | 0.951**        | 0.939**        | 0.976***       | 0.994          | 0.943***       | 0.999          | 0.904          |
|                                | [0.950, 0.998] | [0.919, 0.985] | [0.896, 0.984] | [0.961, 0.992] | [0.930, 1.062] | [0.908, 0.980] | [0.922, 1.082] | [0.902, 0.906] |
| Watch                          | 0.999          | 1.006          | 1.025*         | 0.977***       | 0.974          | 0.993          | 0.935**        | 0.781          |
|                                | [0.984, 1.014] | [0.991, 1.022] | [0.999, 1.053] | [0.968, 0.987] | [0.930, 1.020] | [0.960, 1.027] | [0.886, 0.986] | [0.778, 0.785] |
| Mattress                       | 0.987          | 0.992          | 0.977*         | 0.997          | 0.998          | 0.996          | 0.982          | 0.667          |
|                                | [0.970, 1.005] | [0.977, 1.008] | [0.954, 1.000] | [0.987, 1.007] | [0.958, 1.038] | [0.932, 1.065] | [0.929, 1.039] | [0.662, 0.672] |
| Chair                          | 0.995          | 0.998          | 1.010          | 0.996          | 0.973          | 0.975*         | 0.927**        | 0.762          |
|                                | [0.977, 1.013] | [0.982, 1.014] | [0.984, 1.036] | [0.984, 1.008] | [0.934, 1.012] | [0.946, 1.004] | [0.875, 0.982] | [0.758, 0.765] |
| Cot/bed                        | 0.995          | 0.979          | 0.977          | 0.998          | 1.000          | 0.994          | 0.857***       | 0.884          |
|                                | [0.976, 1.014] | [0.916, 1.047] | [0.949, 1.006] | [0.985, 1.012] | [0.942, 1.062] | [0.953, 1.037] | [0.800, 0.919] | [0.881, 0.887] |
| Table                          | 1.014*         | 1.023          | 0.968          | 0.989*         | 0.903***       | 0.970**        | 0.978          | 0.554          |
|                                | [0.997, 1.031] | [0.971, 1.077] | [0.926, 1.012] | [0.977, 1.002] | [0.868, 0.940] | [0.944, 0.996] | [0.924, 1.034] | [0.550, 0.559] |
| Electric fan                   | 0.987          | 0.995          | 0.977          | 1.004          | 1.020          | 1.000          | 0.929*         | 0.782          |
|                                | [0.966, 1.007] | [0.972, 1.018] | [0.921, 1.036] | [0.987, 1.020] | [0.961, 1.083] | [0.950, 1.054] | [0.860, 1.003] | [0.777, 0.786] |
| Black and white television     | 0.961**        | 0.962**        | 0.983          | 0.990          | 1.042          | 1.061          | 1.133**        | 0.033          |
|                                | [0.931, 0.992] | [0.928, 0.996] | [0.901, 1.072] | [0.955, 1.027] | [0.957, 1.135] | [0.978, 1.150] | [1.027, 1.249] | [0.032, 0.034] |
| Color television               | 0.966***       | 0.972***       | 0.982          | 0.992          | 0.962*         | 0.980          | 0.946*         | 0.635          |
|                                | [0.948, 0.983] | [0.952, 0.992] | [0.947, 1.019] | [0.977, 1.006] | [0.920, 1.006] | [0.952, 1.009] | [0.892, 1.002] | [0.630, 0.640] |
| Sewing machine                 | 0.987          | 1.005          | 1.002          | 0.999          | 1.047**        | 0.981          | 0.919***       | 0.240          |
|                                | [0.964, 1.010] | [0.985, 1.024] | [0.977, 1.028] | [0.987, 1.013] | [1.005, 1.091] | [0.949, 1.014] | [0.863, 0.978] | [0.237, 0.243] |
| Computer                       | 1.021          | 0.977          | 1.014          | 0.967***       | 1.009          | 0.947**        | 0.924          | 0.090          |
|                                | [0.964, 1.081] | [0.935, 1.020] | [0.955, 1.078] | [0.944, 0.990] | [0.927, 1.097] | [0.898, 1.000] | [0.795, 1.075] | [0.087, 0.093] |
| Air conditioner/cooler         | 1.024*         | 1.036          | 1.012          | 1.001          | 1.090***       | 0.986          | 0.948          | 0.179          |

|                                     |                |                |                |                |                |                |                |                |
|-------------------------------------|----------------|----------------|----------------|----------------|----------------|----------------|----------------|----------------|
|                                     | [0.996, 1.052] | [0.986, 1.088] | [0.975, 1.050] | [0.987, 1.015] | [1.028, 1.156] | [0.950, 1.023] | [0.869, 1.035] | [0.175, 0.183] |
| Washing machine                     | 0.954**        | 0.947*         | 0.951*         | 0.992          | 1.012          | 0.947**        | 0.851**        | 0.136          |
|                                     | [0.920, 0.989] | [0.886, 1.012] | [0.895, 1.011] | [0.966, 1.019] | [0.943, 1.085] | [0.904, 0.993] | [0.748, 0.968] | [0.132, 0.140] |
| <b>d) Housing quality</b>           |                |                |                |                |                |                |                |                |
| Residents per bedroom               | 1.008*         | 1.006          | 0.994*         | 1.001          | 0.999          | 0.996          | 0.735***       | 2.917          |
|                                     | [0.998, 1.019] | [0.997, 1.014] | [0.988, 1.001] | [0.998, 1.005] | [0.990, 1.008] | [0.989, 1.003] | [0.721, 0.748] | [2.905, 2.929] |
| Floor: cement                       | RC             | 0.393          |
|                                     |                |                |                |                |                |                |                | [0.388, 0.397] |
| Floor: mud/clay/earth               | 1.034          | 1.025**        | 1.025          | 1.000          | 0.989          | 1.017          | 1.059          | 0.271          |
|                                     | [0.971, 1.100] | [1.001, 1.050] | [0.991, 1.059] | [0.986, 1.015] | [0.929, 1.053] | [0.968, 1.068] | [0.982, 1.142] | [0.266, 0.276] |
| Floor: ceramic tiles                | 1.041***       | 0.966**        | 0.981          | 0.990          | 0.975          | 0.986          | 1.130**        | 0.106          |
|                                     | [1.012, 1.071] | [0.935, 0.998] | [0.922, 1.044] | [0.974, 1.006] | [0.910, 1.045] | [0.946, 1.027] | [1.025, 1.244] | [0.102, 0.110] |
| Floor: carpet                       | 1.047          | 1.088          | 1.104          | 1.069          | 1.112          | 1.008          | 0.971          | 0.006          |
|                                     | [0.909, 1.206] | [0.969, 1.222] | [0.939, 1.298] | [0.959, 1.191] | [0.875, 1.412] | [0.843, 1.206] | [0.606, 1.557] | [0.005, 0.006] |
| Floor: polished stone/marble/grani. | 0.977          | 0.939***       | 0.966          | 0.987          | 0.905***       | 0.898***       | 0.912          | 0.077          |
|                                     | [0.944, 1.012] | [0.906, 0.973] | [0.866, 1.078] | [0.947, 1.028] | [0.839, 0.976] | [0.858, 0.939] | [0.801, 1.039] | [0.074, 0.080] |
| Floor: other                        | 0.815          | 0.819          | 1.175          | 0.895          | 0.929          | 0.738          | 1.702*         | 0.001          |
|                                     | [0.512, 1.299] | [0.416, 1.615] | [0.379, 3.642] | [0.697, 1.149] | [0.457, 1.888] | [0.461, 1.180] | [0.961, 3.013] | [0.001, 0.001] |
| Floor: sand                         | 1.025          | 1.047          | 1.073          | 0.961          | 1.310***       | 1.018          | 1.117          | 0.007          |
|                                     | [0.958, 1.097] | [0.977, 1.122] | [0.956, 1.205] | [0.913, 1.011] | [1.103, 1.556] | [0.903, 1.149] | [0.910, 1.371] | [0.007, 0.007] |
| Floor: dung                         | 1.006          | 1.000          | 0.992          | 0.987          | 1.016          | 1.024          | 1.018          | 0.070          |
|                                     | [0.953, 1.061] | [0.966, 1.035] | [0.946, 1.039] | [0.963, 1.011] | [0.941, 1.097] | [0.968, 1.083] | [0.929, 1.116] | [0.068, 0.072] |
| Floor: raw wood planks              | 0.970          | 1.017          | 1.058          | 0.848          | 0.957          | 1.149          | 1.319          | 0.002          |
|                                     | [0.693, 1.357] | [0.758, 1.366] | [0.701, 1.597] | [0.668, 1.077] | [0.485, 1.890] | [0.672, 1.964] | [0.420, 4.140] | [0.002, 0.003] |
| Floor: palm/bamboo                  | 0.968          | 0.978          | 1.087          | 0.949          | 1.280          | 0.873          | 1.545          | 0.002          |
|                                     | [0.685, 1.368] | [0.685, 1.396] | [0.703, 1.683] | [0.688, 1.308] | [0.606, 2.702] | [0.514, 1.480] | [0.661, 3.609] | [0.002, 0.002] |
| Floor: brick                        | 0.965          | 0.982          | 1.038          | 0.976          | 1.107          | 1.016          | 1.154          | 0.008          |
|                                     | [0.903, 1.031] | [0.912, 1.059] | [0.931, 1.157] | [0.941, 1.012] | [0.947, 1.293] | [0.882, 1.169] | [0.942, 1.414] | [0.007, 0.008] |
| Floor: stone                        | 1.045**        | 0.995          | 0.943***       | 0.980*         | 0.933          | 0.964          | 1.160**        | 0.055          |
|                                     | [1.006, 1.085] | [0.964, 1.027] | [0.902, 0.986] | [0.959, 1.002] | [0.858, 1.014] | [0.913, 1.019] | [1.036, 1.300] | [0.052, 0.057] |
| Floor: parquet/polished wood        | 1.052          | 1.049          | 1.220          | 0.972          | 1.232          | 0.926          | 0.717          | 0.002          |
|                                     | [0.777, 1.424] | [0.835, 1.318] | [0.865, 1.721] | [0.830, 1.140] | [0.755, 2.012] | [0.631, 1.359] | [0.178, 2.886] | [0.002, 0.002] |
| Floor: vinyl/asphalt strips         | 1.210          | 1.308*         | 1.304          | 0.893          | 1.779          | 0.985          | 0.743          | 0.002          |
|                                     | [0.854, 1.715] | [0.993, 1.723] | [0.861, 1.976] | [0.708, 1.126] | [0.632, 5.004] | [0.625, 1.551] | [0.066, 8.331] | [0.001, 0.002] |
| Roof: RCC/RBC/cement/concrete       | RC             | 0.413          |
|                                     |                |                |                |                |                |                |                | [0.408, 0.419] |

|                                  |                            |                            |                         |                            |                            |                         |                            |                         |
|----------------------------------|----------------------------|----------------------------|-------------------------|----------------------------|----------------------------|-------------------------|----------------------------|-------------------------|
| Roof: no roof                    | 1.029<br>[0.914, 1.158]    | 1.105*<br>[0.992, 1.232]   | 1.002<br>[0.765, 1.312] | 0.983<br>[0.902, 1.071]    | 1.047<br>[0.818, 1.342]    | 0.991<br>[0.761, 1.292] | 0.876<br>[0.530, 1.446]    | 0.002<br>[0.002, 0.002] |
| Roof: loosely packed stone       | 1.017<br>[0.983, 1.053]    | 1.006<br>[0.961, 1.052]    | 1.003<br>[0.936, 1.074] | 1.011<br>[0.975, 1.048]    | 1.084<br>[0.975, 1.206]    | 1.008<br>[0.935, 1.087] | 1.131*<br>[0.984, 1.302]   | 0.023<br>[0.022, 0.025] |
| Roof: metal/GI                   | 0.983<br>[0.954, 1.013]    | 0.999<br>[0.971, 1.028]    | 1.001<br>[0.958, 1.046] | 1.014<br>[0.995, 1.034]    | 1.076*<br>[0.995, 1.163]   | 0.996<br>[0.950, 1.045] | 1.156***<br>[1.039, 1.287] | 0.110<br>[0.106, 0.113] |
| Roof: wood                       | 1.007<br>[0.950, 1.068]    | 1.052*<br>[0.994, 1.113]   | 0.995<br>[0.906, 1.092] | 0.990<br>[0.954, 1.027]    | 1.157**<br>[1.010, 1.327]  | 1.069<br>[0.951, 1.203] | 1.239**<br>[1.017, 1.510]  | 0.012<br>[0.011, 0.012] |
| Roof: calamine/cement fiber      | 1.072***<br>[1.034, 1.110] | 1.066***<br>[1.027, 1.107] | 1.030<br>[0.977, 1.087] | 1.044<br>[0.968, 1.126]    | 1.069<br>[0.984, 1.162]    | 1.026<br>[0.970, 1.085] | 1.048<br>[0.922, 1.192]    | 0.028<br>[0.027, 0.030] |
| Roof: asbestos sheets            | 0.990<br>[0.967, 1.014]    | 1.010<br>[0.985, 1.036]    | 1.002<br>[0.970, 1.036] | 1.025***<br>[1.009, 1.041] | 1.001<br>[0.942, 1.063]    | 1.024<br>[0.934, 1.122] | 1.161***<br>[1.072, 1.257] | 0.076<br>[0.073, 0.078] |
| Roof: roofing shingles           | 1.025<br>[0.984, 1.068]    | 1.014<br>[0.965, 1.065]    | 1.011<br>[0.930, 1.099] | 0.964<br>[0.916, 1.013]    | 1.043<br>[0.901, 1.208]    | 0.972<br>[0.872, 1.084] | 1.306***<br>[1.111, 1.536] | 0.020<br>[0.019, 0.021] |
| Roof: tiles                      | 1.053***<br>[1.027, 1.080] | 1.030**<br>[1.003, 1.058]  | 0.992<br>[0.954, 1.032] | 0.994<br>[0.957, 1.032]    | 1.105***<br>[1.026, 1.190] | 1.061<br>[0.928, 1.213] | 1.120**<br>[1.016, 1.235]  | 0.071<br>[0.068, 0.073] |
| Roof: slate                      | 1.018<br>[0.991, 1.045]    | 1.002<br>[0.975, 1.029]    | 0.981<br>[0.940, 1.024] | 1.008<br>[0.986, 1.031]    | 0.975<br>[0.911, 1.043]    | 0.969<br>[0.911, 1.030] | 1.194***<br>[1.087, 1.312] | 0.081<br>[0.079, 0.084] |
| Roof: burnt brick                | 1.027*<br>[0.999, 1.055]   | 1.007<br>[0.974, 1.041]    | 0.969<br>[0.910, 1.032] | 1.001<br>[0.974, 1.029]    | 0.971<br>[0.901, 1.047]    | 1.024<br>[0.963, 1.088] | 1.074<br>[0.976, 1.182]    | 0.045<br>[0.043, 0.047] |
| Roof: thatch/palm leaf           | 0.988<br>[0.959, 1.018]    | 0.978<br>[0.942, 1.015]    | 0.965<br>[0.919, 1.013] | 1.030***<br>[1.008, 1.053] | 0.975<br>[0.901, 1.055]    | 1.002<br>[0.919, 1.094] | 1.088*<br>[0.986, 1.201]   | 0.045<br>[0.043, 0.046] |
| Roof: other                      | 1.000<br>[0.958, 1.043]    | 1.019<br>[0.968, 1.074]    | 0.995<br>[0.888, 1.114] | 1.014<br>[0.983, 1.046]    | 1.051<br>[0.946, 1.168]    | 0.960<br>[0.872, 1.057] | 1.291***<br>[1.098, 1.518] | 0.029<br>[0.027, 0.031] |
| Roof: mud                        | 1.010<br>[0.954, 1.069]    | 0.973<br>[0.905, 1.046]    | 0.979<br>[0.890, 1.077] | 1.005<br>[0.966, 1.046]    | 1.001<br>[0.869, 1.153]    | 0.933<br>[0.829, 1.051] | 1.158<br>[0.941, 1.427]    | 0.009<br>[0.008, 0.009] |
| Roof: sod/mud and grass mixture  | 1.051**<br>[1.000, 1.104]  | 0.998<br>[0.946, 1.053]    | 1.007<br>[0.894, 1.134] | 1.039*<br>[0.998, 1.082]   | 1.048<br>[0.870, 1.263]    | 1.089<br>[0.905, 1.310] | 0.980<br>[0.815, 1.177]    | 0.009<br>[0.009, 0.010] |
| Roof: plastic/polythene sheeting | 1.023<br>[0.967, 1.082]    | 1.022<br>[0.918, 1.138]    | 1.053<br>[0.892, 1.242] | 1.041**<br>[1.007, 1.076]  | 1.074<br>[0.923, 1.250]    | 1.008<br>[0.903, 1.126] | 1.306**<br>[1.061, 1.607]  | 0.008<br>[0.007, 0.008] |
| Roof: rustic mat                 | 0.934<br>[0.817, 1.068]    | 0.918<br>[0.782, 1.078]    | 1.119<br>[0.902, 1.389] | 0.924<br>[0.760, 1.123]    | 1.104<br>[0.842, 1.448]    | 1.041<br>[0.781, 1.387] | 0.864<br>[0.492, 1.518]    | 0.001<br>[0.001, 0.001] |
| Roof: palm/bamboo                | 1.000<br>[0.928, 1.077]    | 0.990<br>[0.933, 1.050]    | 1.015<br>[0.927, 1.112] | 1.009<br>[0.954, 1.066]    | 1.121*<br>[0.980, 1.281]   | 0.997<br>[0.755, 1.316] | 1.283***<br>[1.079, 1.525] | 0.007<br>[0.007, 0.008] |
| Roof: raw wood planks/timber     | 1.012<br>[0.944, 1.085]    | 1.010<br>[0.931, 1.095]    | 1.069<br>[0.953, 1.200] | 1.024<br>[0.969, 1.083]    | 1.086<br>[0.914, 1.290]    | 0.955<br>[0.808, 1.128] | 0.941<br>[0.691, 1.282]    | 0.006<br>[0.006, 0.007] |

|                                |                            |                           |                           |                            |                          |                            |                            |                         |
|--------------------------------|----------------------------|---------------------------|---------------------------|----------------------------|--------------------------|----------------------------|----------------------------|-------------------------|
| Roof: unburnt bricks           | 1.034<br>[0.965, 1.108]    | 1.020<br>[0.938, 1.109]   | 1.053<br>[0.934, 1.187]   | 1.024<br>[0.974, 1.076]    | 1.014<br>[0.845, 1.217]  | 1.048<br>[0.846, 1.299]    | 1.145<br>[0.895, 1.465]    | 0.005<br>[0.005, 0.005] |
| Wall: cement/concrete          | RC                         | RC                        | RC                        | RC                         | RC                       | RC                         | RC                         | 0.379<br>[0.373, 0.385] |
| Wall: no walls                 | 1.139***<br>[1.040, 1.246] | 1.103*<br>[0.983, 1.237]  | 0.986<br>[0.808, 1.204]   | 0.964<br>[0.883, 1.053]    | 0.889<br>[0.687, 1.152]  | 0.792*<br>[0.593, 1.056]   | 0.881<br>[0.519, 1.496]    | 0.003<br>[0.003, 0.004] |
| Wall: raw/reused wood          | 1.017<br>[0.861, 1.202]    | 0.971<br>[0.784, 1.203]   | 0.950<br>[0.655, 1.378]   | 1.029<br>[0.885, 1.196]    | 1.012<br>[0.540, 1.899]  | 1.012<br>[0.671, 1.525]    | 0.951<br>[0.371, 2.434]    | 0.003<br>[0.002, 0.003] |
| Wall: stone with lime/cement   | 1.004<br>[0.967, 1.042]    | 1.006<br>[0.967, 1.046]   | 1.064*<br>[0.993, 1.141]  | 0.996<br>[0.972, 1.021]    | 0.994<br>[0.899, 1.099]  | 1.071**<br>[1.009, 1.136]  | 1.045<br>[0.931, 1.173]    | 0.059<br>[0.057, 0.061] |
| Wall: burnt bricks             | 1.013<br>[0.992, 1.035]    | 1.015<br>[0.992, 1.038]   | 1.020<br>[0.989, 1.052]   | 1.021<br>[0.981, 1.062]    | 1.013<br>[0.964, 1.064]  | 1.023<br>[0.967, 1.082]    | 1.052<br>[0.980, 1.128]    | 0.252<br>[0.247, 0.257] |
| Wall: cement blocks            | 1.002<br>[0.972, 1.033]    | 1.036**<br>[1.001, 1.072] | 1.045**<br>[1.001, 1.091] | 1.014<br>[0.976, 1.053]    | 1.042<br>[0.963, 1.127]  | 1.076***<br>[1.025, 1.129] | 1.064<br>[0.954, 1.188]    | 0.058<br>[0.055, 0.060] |
| Wall: wood planks/shingles     | 0.937<br>[0.737, 1.191]    | 0.872<br>[0.714, 1.065]   | 0.821<br>[0.570, 1.184]   | 0.983<br>[0.864, 1.118]    | 1.110<br>[0.723, 1.703]  | 0.971<br>[0.707, 1.332]    | 1.162<br>[0.625, 2.157]    | 0.002<br>[0.002, 0.002] |
| Wall: GI/metal/asbestos sheets | 1.060<br>[0.969, 1.159]    | 0.921*<br>[0.840, 1.010]  | 1.038<br>[0.930, 1.159]   | 1.047<br>[0.967, 1.134]    | 1.106<br>[0.894, 1.368]  | 0.995<br>[0.887, 1.116]    | 1.591***<br>[1.140, 2.221] | 0.010<br>[0.009, 0.011] |
| Wall: other                    | 0.908<br>[0.753, 1.095]    | 1.019<br>[0.879, 1.180]   | 1.134<br>[0.936, 1.374]   | 1.034<br>[0.896, 1.192]    | 1.407*<br>[0.988, 2.003] | 0.945<br>[0.750, 1.191]    | 0.870<br>[0.504, 1.502]    | 0.002<br>[0.002, 0.002] |
| Wall: cane/palm/trunks         | 0.983<br>[0.929, 1.041]    | 1.027<br>[0.974, 1.083]   | 1.119**<br>[1.020, 1.227] | 1.007<br>[0.964, 1.052]    | 1.030<br>[0.860, 1.233]  | 1.000<br>[0.909, 1.099]    | 1.127<br>[0.940, 1.350]    | 0.016<br>[0.015, 0.017] |
| Wall: mud                      | 0.976<br>[0.937, 1.017]    | 0.995<br>[0.969, 1.022]   | 1.048**<br>[1.005, 1.092] | 1.046***<br>[1.027, 1.064] | 0.996<br>[0.933, 1.063]  | 1.018<br>[0.973, 1.065]    | 1.079<br>[0.984, 1.184]    | 0.136<br>[0.132, 0.139] |
| Wall: grass/reeds/thatch       | 1.044<br>[0.990, 1.102]    | 1.058*<br>[0.999, 1.121]  | 1.001<br>[0.905, 1.107]   | 0.994<br>[0.918, 1.077]    | 1.078<br>[0.947, 1.228]  | 1.022<br>[0.911, 1.147]    | 1.083<br>[0.909, 1.291]    | 0.009<br>[0.008, 0.009] |
| Wall: bamboo with mud          | 1.028<br>[0.976, 1.082]    | 1.053*<br>[0.996, 1.114]  | 1.063<br>[0.987, 1.145]   | 1.031*<br>[0.999, 1.063]   | 1.077<br>[0.951, 1.221]  | 0.953<br>[0.856, 1.061]    | 1.131*<br>[0.986, 1.298]   | 0.028<br>[0.027, 0.029] |
| Wall: stone with mud           | 1.006<br>[0.959, 1.055]    | 1.027<br>[0.980, 1.076]   | 1.080*<br>[0.998, 1.170]  | 0.983<br>[0.939, 1.030]    | 0.983<br>[0.866, 1.117]  | 1.028<br>[0.943, 1.121]    | 1.192**<br>[1.001, 1.420]  | 0.021<br>[0.020, 0.022] |
| Wall: plywood                  | 1.051<br>[0.805, 1.373]    | 0.870<br>[0.626, 1.210]   | 0.857<br>[0.528, 1.393]   | 1.101<br>[0.914, 1.327]    | 1.359<br>[0.779, 2.370]  | 0.927<br>[0.593, 1.449]    | 0.333<br>[0.029, 3.777]    | 0.001<br>[0.001, 0.001] |
| Wall: cardboard                | 1.081<br>[0.937, 1.249]    | 1.029<br>[0.858, 1.234]   | 0.890<br>[0.617, 1.285]   | 0.908<br>[0.772, 1.068]    | 0.847<br>[0.491, 1.461]  | 1.379*<br>[0.984, 1.932]   | 0.976<br>[0.542, 1.757]    | 0.001<br>[0.001, 0.001] |
| Wall: unburnt brick            | 1.031<br>[0.994, 1.071]    | 1.015<br>[0.975, 1.056]   | 1.030<br>[0.929, 1.141]   | 1.024<br>[0.987, 1.061]    | 0.931<br>[0.837, 1.037]  | 1.042<br>[0.914, 1.189]    | 1.126**<br>[1.002, 1.265]  | 0.021<br>[0.020, 0.022] |

**e) Other**

|                               |                            |                            |                            |                            |                            |                            |                            |                         |
|-------------------------------|----------------------------|----------------------------|----------------------------|----------------------------|----------------------------|----------------------------|----------------------------|-------------------------|
| Staff                         | 0.899<br>[0.602, 1.343]    | 0.859<br>[0.574, 1.286]    | 0.927<br>[0.539, 1.596]    | 0.993<br>[0.708, 1.394]    | 1.070<br>[0.590, 1.939]    | 0.985<br>[0.658, 1.475]    | 1.683<br>[0.869, 3.260]    | 0.002<br>[0.001, 0.002] |
| Bank account                  | 0.973***<br>[0.956, 0.990] | 0.998<br>[0.977, 1.019]    | 0.976<br>[0.948, 1.005]    | 0.977<br>[0.926, 1.031]    | 1.064**<br>[1.014, 1.118]  | 0.934***<br>[0.897, 0.972] | 0.978<br>[0.914, 1.046]    | 0.895<br>[0.893, 0.897] |
| Electricity                   | 0.989<br>[0.967, 1.011]    | 0.979**<br>[0.959, 1.000]  | 0.958**<br>[0.924, 0.993]  | 0.991<br>[0.972, 1.011]    | 0.958<br>[0.906, 1.013]    | 0.991<br>[0.951, 1.033]    | 0.944<br>[0.879, 1.014]    | 0.882<br>[0.879, 0.885] |
| Animal-drawn cart             | 0.987<br>[0.957, 1.017]    | 1.012<br>[0.981, 1.044]    | 1.016<br>[0.973, 1.060]    | 1.015*<br>[0.998, 1.033]   | 0.973<br>[0.907, 1.044]    | 0.990<br>[0.919, 1.068]    | 0.995<br>[0.897, 1.104]    | 0.036<br>[0.035, 0.037] |
| Land usable for agriculture   | 0.983**<br>[0.971, 0.996]  | 0.958***<br>[0.945, 0.971] | 0.973**<br>[0.952, 0.994]  | 0.987**<br>[0.976, 0.997]  | 0.982<br>[0.949, 1.015]    | 0.986<br>[0.945, 1.029]    | 0.968<br>[0.920, 1.018]    | 0.389<br>[0.384, 0.394] |
| Internet                      | 1.023<br>[0.984, 1.063]    | 0.993<br>[0.944, 1.045]    | 0.973<br>[0.910, 1.040]    | 0.988<br>[0.965, 1.011]    | 1.061<br>[0.985, 1.142]    | 0.986<br>[0.940, 1.034]    | 0.975<br>[0.865, 1.100]    | 0.109<br>[0.106, 0.112] |
| Thresher                      | 0.997<br>[0.943, 1.054]    | 1.027<br>[0.954, 1.105]    | 1.125***<br>[1.056, 1.199] | 0.994<br>[0.965, 1.024]    | 1.104*<br>[0.992, 1.228]   | 0.979<br>[0.900, 1.065]    | 1.050<br>[0.885, 1.245]    | 0.015<br>[0.014, 0.015] |
| Tractor                       | 0.992<br>[0.947, 1.040]    | 0.956<br>[0.903, 1.012]    | 0.929**<br>[0.876, 0.986]  | 1.021*<br>[0.997, 1.046]   | 1.030<br>[0.946, 1.122]    | 1.009<br>[0.946, 1.075]    | 0.948<br>[0.839, 1.072]    | 0.025<br>[0.024, 0.025] |
| Household member owns a house | 1.030***<br>[1.013, 1.047] | 1.015*<br>[0.998, 1.031]   | 0.988<br>[0.963, 1.013]    | 1.009*<br>[0.998, 1.021]   | 1.003<br>[0.956, 1.051]    | 0.992<br>[0.963, 1.021]    | 1.010<br>[0.954, 1.070]    | 0.798<br>[0.794, 0.803] |
| <b>Covariates</b>             |                            |                            |                            |                            |                            |                            |                            |                         |
| Birth interval                | 0.997***<br>[0.997, 0.998] | 0.997***<br>[0.997, 0.998] | 0.999<br>[0.998, 1.001]    | 0.999***<br>[0.999, 1.000] | 1.001*<br>[1.000, 1.001]   | 1.000<br>[0.999, 1.000]    | 0.997***<br>[0.996, 0.999] |                         |
| Birth order                   | 1.061***<br>[1.047, 1.074] | 1.099***<br>[1.084, 1.114] | 1.132***<br>[1.076, 1.190] | 0.995<br>[0.982, 1.008]    | 1.736***<br>[1.654, 1.822] | 0.993<br>[0.971, 1.016]    | 0.393***<br>[0.372, 0.415] |                         |
| Age (months)                  | 1.008***<br>[1.007, 1.008] | 1.007***<br>[1.006, 1.007] | 0.990***<br>[0.990, 0.991] | 0.990***<br>[0.990, 0.990] | 0.982***<br>[0.981, 0.983] | 0.999***<br>[0.998, 0.999] | 0.982***<br>[0.980, 0.983] |                         |
| Female                        | 0.970***<br>[0.960, 0.981] | 0.976***<br>[0.964, 0.988] | 0.917***<br>[0.899, 0.935] | 1.003<br>[0.990, 1.017]    | 0.959***<br>[0.934, 0.985] | 1.107***<br>[1.055, 1.161] | 0.829***<br>[0.796, 0.863] |                         |
| First born                    | 0.855***<br>[0.838, 0.873] | 0.893***<br>[0.874, 0.913] | 0.998<br>[0.951, 1.048]    | 0.957***<br>[0.945, 0.969] | 1.049*<br>[0.999, 1.103]   | 1.142***<br>[1.084, 1.203] | 1.036<br>[0.950, 1.128]    |                         |
| Delivered at home             | 1.018<br>[0.994, 1.043]    | 1.058***<br>[1.042, 1.074] | 1.040<br>[0.987, 1.095]    | 1.011*<br>[0.998, 1.024]   | 0.968<br>[0.930, 1.007]    | 1.133***<br>[1.102, 1.165] | 1.107***<br>[1.047, 1.171] |                         |
| Mother's age at birth         | 0.960***<br>[0.950, 0.970] | 0.967***<br>[0.959, 0.975] | 0.991<br>[0.978, 1.004]    | 0.995<br>[0.982, 1.008]    | 0.975**<br>[0.953, 0.998]  | 0.957***<br>[0.939, 0.976] | 0.880***<br>[0.855, 0.906] |                         |
| Mother's age at birth squared | 1.001***<br>[1.000, 1.001] | 1.001***<br>[1.000, 1.001] | 1.000*<br>[1.000, 1.000]   | 1.000<br>[1.000, 1.000]    | 1.000<br>[1.000, 1.001]    | 1.001***<br>[1.001, 1.001] | 1.002***<br>[1.002, 1.003] |                         |

|                                   |                            |                            |                            |                            |                            |                            |                            |
|-----------------------------------|----------------------------|----------------------------|----------------------------|----------------------------|----------------------------|----------------------------|----------------------------|
| Maternal height (z-score)         | 0.813***<br>[0.806, 0.820] | 0.825***<br>[0.815, 0.835] | 0.968***<br>[0.951, 0.984] | 0.991***<br>[0.987, 0.995] | 1.020**<br>[1.005, 1.036]  | 0.882***<br>[0.872, 0.892] | 0.916***<br>[0.896, 0.936] |
| Received no vaccination           | 0.953***<br>[0.926, 0.980] | 0.974*<br>[0.947, 1.001]   | 1.054***<br>[1.014, 1.096] | 1.005<br>[0.991, 1.020]    | 0.871***<br>[0.815, 0.931] |                            |                            |
| Siblings ever born                | 0.957***<br>[0.942, 0.973] | 0.926***<br>[0.915, 0.938] | 0.886***<br>[0.857, 0.916] | 1.013**<br>[1.003, 1.023]  | 0.577***<br>[0.550, 0.606] | 0.987<br>[0.962, 1.014]    | 3.027***<br>[2.879, 3.184] |
| Mother's education: none          | RC                         |
| Mother's education: primary       | 0.971***<br>[0.956, 0.986] | 0.964***<br>[0.947, 0.981] | 0.973*<br>[0.945, 1.001]   | 0.986*<br>[0.970, 1.002]   | 1.127***<br>[1.077, 1.180] | 1.025<br>[0.989, 1.063]    | 1.116***<br>[1.050, 1.186] |
| Mother's education: secondary     | 0.885***<br>[0.871, 0.899] | 0.903***<br>[0.887, 0.919] | 0.972<br>[0.939, 1.007]    | 0.955***<br>[0.942, 0.968] | 1.071***<br>[1.022, 1.122] | 0.968<br>[0.895, 1.046]    | 0.966<br>[0.908, 1.028]    |
| Mother's education: higher        | 0.752***<br>[0.674, 0.838] | 0.756***<br>[0.728, 0.785] | 0.912*<br>[0.817, 1.018]   | 0.904***<br>[0.885, 0.924] | 0.975<br>[0.909, 1.045]    | 0.813***<br>[0.729, 0.906] | 0.827***<br>[0.734, 0.931] |
| Wealth quintile: first            | RC                         |
| Wealth quintile: second           | 1.008<br>[0.985, 1.032]    | 0.974**<br>[0.950, 1.000]  | 0.997<br>[0.957, 1.038]    | 1.017**<br>[1.001, 1.034]  | 1.023<br>[0.960, 1.090]    | 1.050**<br>[1.002, 1.101]  | 1.081*<br>[0.988, 1.182]   |
| Wealth quintile: third            | 0.989<br>[0.924, 1.059]    | 0.915***<br>[0.869, 0.963] | 0.991<br>[0.917, 1.071]    | 1.042***<br>[1.012, 1.073] | 1.023<br>[0.919, 1.138]    | 1.073*<br>[0.998, 1.154]   | 1.173**<br>[1.008, 1.365]  |
| Wealth quintile: fourth           | 0.939<br>[0.824, 1.070]    | 0.885***<br>[0.820, 0.956] | 0.995<br>[0.892, 1.110]    | 1.019<br>[0.977, 1.064]    | 0.999<br>[0.860, 1.161]    | 1.144***<br>[1.038, 1.260] | 1.225*<br>[0.988, 1.520]   |
| Wealth quintile: fifth            | 0.871**<br>[0.764, 0.993]  | 0.808***<br>[0.746, 0.874] | 1.016<br>[0.900, 1.146]    | 1.037<br>[0.985, 1.091]    | 0.975<br>[0.805, 1.181]    | 1.170**<br>[1.033, 1.325]  | 1.277<br>[0.954, 1.711]    |
| Caste/tribe: schedule caste       | RC                         |
| Caste/tribe: schedule tribe       | 0.999<br>[0.966, 1.032]    | 1.033**<br>[1.006, 1.062]  | 1.074***<br>[1.028, 1.121] | 1.056***<br>[1.035, 1.077] | 0.938*<br>[0.871, 1.010]   | 1.029<br>[0.967, 1.094]    | 0.927<br>[0.838, 1.025]    |
| Caste/tribe: other backward class | 0.974***<br>[0.958, 0.990] | 0.980**<br>[0.963, 0.997]  | 1.008<br>[0.985, 1.032]    | 0.976***<br>[0.961, 0.992] | 0.985<br>[0.936, 1.036]    | 1.000<br>[0.975, 1.025]    | 0.953*<br>[0.904, 1.005]   |
| Caste/tribe: none of them         | 0.913**<br>[0.867, 0.960]  | 0.925***<br>[0.901, 0.949] | 0.978<br>[0.948, 1.008]    | 0.984**<br>[0.972, 0.997]  | 1.006<br>[0.958, 1.057]    | 0.991<br>[0.943, 1.042]    | 0.937*<br>[0.873, 1.005]   |
| Caste/tribe: don't know           | 0.945<br>[0.879, 1.015]    | 0.979<br>[0.898, 1.068]    | 0.976<br>[0.892, 1.069]    | 0.995<br>[0.844, 1.174]    | 1.047<br>[0.875, 1.253]    | 1.066<br>[0.936, 1.213]    | 0.949<br>[0.764, 1.180]    |
| Singleton birth                   | RC                         |

|                              |                            |                            |                            |                         |                         |                            |                            |         |
|------------------------------|----------------------------|----------------------------|----------------------------|-------------------------|-------------------------|----------------------------|----------------------------|---------|
| First born twin/triplet etc. | 1.183***<br>[1.118, 1.251] | 1.339**<br>[1.139, 1.574]  | 1.268***<br>[1.108, 1.452] | 1.028<br>[0.980, 1.079] | 1.045<br>[0.871, 1.255] | 3.640***<br>[3.458, 3.833] | 1.201***<br>[1.060, 1.361] |         |
| Later born twin/triplet etc. | 1.120***<br>[1.063, 1.179] | 1.264***<br>[1.205, 1.325] | 1.246***<br>[1.101, 1.410] | 1.023<br>[0.980, 1.069] | 1.035<br>[0.902, 1.187] | 3.898***<br>[3.696, 4.110] | 5.044***<br>[4.473, 5.687] |         |
| Observations                 | 245,866                    | 245,866                    | 245,866                    | 245,866                 | 245,558                 | 245,866                    | 244,870                    | 601,509 |

Notes: \*\*\* p<0.01, \*\* p<0.05, \* p<0.1. Prevalence ratios are shown. All estimates were weighted and tests for statistical significance and 95% confidence intervals (shown in brackets) were calculated using robust standard errors. All estimates in each column were obtained from a single model. Control variables: sex, age, maternal age at birth, birth order, birth interval, firstborn, twin, vaccination status (except for mortality and low birth weight), born at home, maternal education, caste/tribe, and wealth index quintiles. Models were further adjusted for unobserved district-level factors. Proportions are for all households interviewed. Multiple imputation by chained equations was used to impute missing outcomes and covariates. Estimates were obtained from two imputations with 10 burn-in iterations. Augmented logit regressions were used for discrete variables and augmented ordinary least squares regressions for continuous variables. Imputations were done using all outcomes and all independent variables as well as auxiliary variables. Auxiliary variables were: PSU means or prevalence of children delivered at home, stunting, wasting, underweight children, anemia, diarrhea, low birth weight, deaths of children under-5, children born small (as reported by mothers), unvaccinated children, mother's with education, children belonging to scheduled castes, husbands with no education, children in the poorest quintile, children in household without toilet facilities, children in households with piped water, BMI of women, women with anemia, women with no education, illiterate women, women's age at first birth, number of children per female: household means or prevalence of children delivered at home, stunting, wasting, underweight children, anemia, diarrhea, low birth weight, mortality, children born small (as reported by mothers), unvaccinated children: and indicators for being born small (as reported by mothers): and measures for mother's BMI, whether mother has anemia, and father has education (husband of the mother). PSU and household means and prevalence were only calculated for groups with at least two valid observations. PSU and household means and prevalence were calculated using the full sample. Acronyms and abbreviations: liquefied petroleum gas (LPG), reinforced cement concrete (RCC), reinforced brick concrete (RBC), galvanized iron (GI), granite (grani.), shared (sh.), sewer system (sewer s.), without (w/o), with(w/), reverse osmosis (RO), reference category (RC).

Table A8. Variance inflation factor (VIF) for independent variables used in table 4.

|                                       | <u>Stunting</u> | <u>Underweight</u> | <u>Wasting</u> | <u>Anemia</u> | <u>Diarrhea</u> | <u>Low birth weight</u> | <u>Mortality</u> |
|---------------------------------------|-----------------|--------------------|----------------|---------------|-----------------|-------------------------|------------------|
| <b>a) Water and toilet facilities</b> |                 |                    |                |               |                 |                         |                  |
| Water pump                            | 1.517           | 1.512              | 1.518          | 1.516         | 1.533           | 1.545                   | 1.512            |
| Toilet: no facility/bush/field        | RC              | RC                 | RC             | RC            | RC              | RC                      | RC               |
| Toilet: flush to piped sewer system   | 1.643           | 1.648              | 1.664          | 1.706         | 1.553           | 1.763                   | 1.366            |
| Toilet: composting toilet             | 1.007           | 1.006              | 1.007          | 1.006         | 1.008           | 1.007                   | 1.008            |
| Toilet: dry toilet                    | 1.017           | 1.016              | 1.015          | 1.019         | 1.017           | 1.015                   | 1.028            |
| Toilet: other                         | 1.007           | 1.007              | 1.007          | 1.007         | 1.011           | 1.007                   | 1.005            |
| Toilet: sh. Flush to piped sewer s.   | 1.104           | 1.104              | 1.102          | 1.113         | 1.107           | 1.109                   | 1.098            |
| Toilet: shared flush to septic tank   | 1.366           | 1.361              | 1.343          | 1.369         | 1.378           | 1.381                   | 1.334            |
| Toilet: shared flush to pit latrine   | 1.069           | 1.064              | 1.063          | 1.070         | 1.064           | 1.073                   | 1.060            |
| Toilet: sh. Flush to somewhere else   | 1.051           | 1.053              | 1.027          | 1.049         | 1.036           | 1.074                   | 1.015            |
| Toilet: sh. Flush don't know where    | 1.009           | 1.009              | 1.010          | 1.006         | 1.015           | 1.005                   | 1.015            |
| Toilet: sh. Ventilated improved pit   | 1.008           | 1.007              | 1.008          | 1.008         | 1.007           | 1.008                   | 1.007            |
| Toilet: shared pit latrine w/ slab    | 1.054           | 1.049              | 1.048          | 1.053         | 1.039           | 1.059                   | 1.063            |
| Toilet: flush to septic tank          | 2.817           | 2.793              | 2.821          | 2.919         | 2.710           | 3.125                   | 2.395            |
| Toilet: sh. Pit w/o slab/open pit     | 1.018           | 1.017              | 1.016          | 1.017         | 1.013           | 1.017                   | 1.021            |
| Toilet: shared composting toilet      | 1.004           | 1.004              | 1.005          | 1.004         | 1.003           | 1.008                   | 1.005            |
| Toilet: shared dry toilet             | 1.011           | 1.011              | 1.011          | 1.012         | 1.008           | 1.020                   | 1.009            |
| Toilet: shared other                  | 1.011           | 1.013              | 1.015          | 1.016         | 1.016           | 1.018                   | 1.035            |
| Toilet: flush to pit latrine          | 1.339           | 1.331              | 1.321          | 1.356         | 1.297           | 1.402                   | 1.250            |
| Toilet: flush to somewhere else       | 1.053           | 1.048              | 1.048          | 1.055         | 1.038           | 1.053                   | 1.054            |
| Toilet: flush don't know where        | 1.013           | 1.013              | 1.013          | 1.010         | 1.010           | 1.017                   | 1.009            |
| Toilet: ventilated improved pit       | 1.031           | 1.029              | 1.030          | 1.034         | 1.037           | 1.038                   | 1.027            |
| Toilet: pit latrine with slab         | 1.168           | 1.160              | 1.158          | 1.174         | 1.136           | 1.196                   | 1.137            |
| Toilet: pit without slab/open pit     | 1.075           | 1.071              | 1.065          | 1.067         | 1.039           | 1.062                   | 1.079            |
| Water: tube well or borehole          | RC              | RC                 | RC             | RC            | RC              | RC                      | RC               |
| Water: piped into dwelling            | 1.840           | 1.847              | 1.876          | 1.929         | 1.775           | 2.035                   | 1.580            |
| Water: rainwater                      | 1.016           | 1.015              | 1.015          | 1.017         | 1.015           | 1.012                   | 1.010            |
| Water: tanker truck                   | 1.094           | 1.093              | 1.079          | 1.096         | 1.073           | 1.121                   | 1.080            |
| Water: cart with small tank           | 1.008           | 1.008              | 1.007          | 1.008         | 1.009           | 1.011                   | 1.010            |
| Water: bottled water                  | 1.166           | 1.171              | 1.179          | 1.182         | 1.162           | 1.202                   | 1.123            |
| Water: community RO plant             | 1.024           | 1.025              | 1.025          | 1.028         | 1.029           | 1.031                   | 1.031            |
| Water: other                          | 1.007           | 1.007              | 1.007          | 1.009         | 1.017           | 1.015                   | 1.033            |
| Water: piped to yard/plot             | 1.555           | 1.558              | 1.571          | 1.597         | 1.504           | 1.653                   | 1.394            |

|                                        |        |        |        |        |        |        |        |
|----------------------------------------|--------|--------|--------|--------|--------|--------|--------|
| Water: public tap/standpipe            | 1.522  | 1.527  | 1.519  | 1.572  | 1.458  | 1.664  | 1.378  |
| Water: protected well                  | 1.130  | 1.119  | 1.124  | 1.139  | 1.076  | 1.170  | 1.062  |
| Water: unprotected well                | 1.173  | 1.174  | 1.176  | 1.171  | 1.174  | 1.175  | 1.175  |
| Water: protected spring                | 1.022  | 1.021  | 1.021  | 1.022  | 1.024  | 1.019  | 1.023  |
| Water: unprotected spring              | 1.031  | 1.028  | 1.028  | 1.030  | 1.032  | 1.022  | 1.032  |
| Water: river/dam/lake/ponds etc.       | 1.038  | 1.035  | 1.036  | 1.037  | 1.034  | 1.030  | 1.048  |
| <b>b) Food storage and preparation</b> |        |        |        |        |        |        |        |
| Cooking: wood                          | RC     |
| Cooking: electricity                   | 1.028  | 1.026  | 1.024  | 1.030  | 1.031  | 1.035  | 1.034  |
| Cooking: animal dung                   | 1.448  | 1.448  | 1.461  | 1.438  | 1.497  | 1.352  | 1.514  |
| Cooking: no food cooked in house       | 1.003  | 1.004  | 1.004  | 1.003  | 1.006  | 1.002  | 1.003  |
| Cooking: other                         | 1.007  | 1.008  | 1.011  | 1.004  | 1.003  | 1.010  | 1.002  |
| Cooking: LPG/natural gas               | 3.674  | 3.706  | 3.790  | 3.937  | 3.588  | 4.108  | 3.093  |
| Cooking: biogas                        | 1.051  | 1.048  | 1.049  | 1.052  | 1.050  | 1.057  | 1.029  |
| Cooking: kerosene                      | 1.086  | 1.085  | 1.087  | 1.081  | 1.092  | 1.085  | 1.095  |
| Cooking: coal, lignite                 | 1.039  | 1.040  | 1.043  | 1.039  | 1.035  | 1.038  | 1.038  |
| Cooking: charcoal                      | 1.022  | 1.022  | 1.023  | 1.022  | 1.024  | 1.021  | 1.018  |
| Cooking: straw/shrubs/grass            | 1.164  | 1.164  | 1.171  | 1.158  | 1.187  | 1.126  | 1.175  |
| Cooking: agricultural crop             | 1.162  | 1.165  | 1.175  | 1.160  | 1.187  | 1.121  | 1.193  |
| Refrigerator                           | 3.272  | 3.265  | 3.310  | 3.400  | 3.248  | 3.443  | 3.003  |
| Pressure cooker                        | 4.339  | 4.323  | 4.358  | 4.544  | 4.207  | 4.945  | 3.714  |
| <b>c) Other consumer goods</b>         |        |        |        |        |        |        |        |
| Radio                                  | 1.135  | 1.134  | 1.136  | 1.135  | 1.142  | 1.144  | 1.144  |
| Bicycle                                | 2.526  | 2.523  | 2.506  | 2.477  | 2.609  | 2.350  | 2.709  |
| Motorcycle/scooter                     | 2.670  | 2.670  | 2.691  | 2.739  | 2.641  | 2.851  | 2.429  |
| Car/truck                              | 1.374  | 1.367  | 1.386  | 1.399  | 1.346  | 1.395  | 1.316  |
| Telephone (land-line)                  | 1.157  | 1.152  | 1.168  | 1.169  | 1.124  | 1.168  | 1.159  |
| Mobile telephone                       | 15.323 | 15.169 | 14.968 | 15.697 | 15.092 | 18.263 | 12.997 |
| Watch                                  | 5.501  | 5.459  | 5.435  | 5.697  | 5.171  | 6.669  | 4.470  |
| Mattress                               | 4.335  | 4.311  | 4.279  | 4.461  | 4.182  | 5.018  | 3.713  |
| Chair                                  | 5.541  | 5.485  | 5.447  | 5.689  | 5.129  | 6.492  | 4.564  |
| Cot/bed                                | 11.762 | 11.676 | 11.512 | 11.482 | 12.341 | 11.654 | 12.223 |
| Table                                  | 3.540  | 3.500  | 3.462  | 3.617  | 3.308  | 3.778  | 3.139  |
| Electric fan                           | 9.116  | 9.099  | 9.046  | 9.590  | 8.523  | 11.461 | 7.188  |
| Black and white television             | 1.079  | 1.080  | 1.079  | 1.078  | 1.081  | 1.085  | 1.100  |
| Color television                       | 5.020  | 5.010  | 4.982  | 5.322  | 4.657  | 5.993  | 3.971  |

|                                     |       |       |       |       |       |       |       |
|-------------------------------------|-------|-------|-------|-------|-------|-------|-------|
| Sewing machine                      | 1.917 | 1.906 | 1.892 | 1.912 | 1.976 | 1.951 | 1.902 |
| Computer                            | 1.593 | 1.572 | 1.633 | 1.641 | 1.542 | 1.621 | 1.510 |
| Air conditioner/cooler              | 2.076 | 2.059 | 2.031 | 2.078 | 2.117 | 2.090 | 2.089 |
| Washing machine                     | 2.113 | 2.071 | 2.079 | 2.161 | 2.087 | 2.149 | 2.017 |
| <b>d) Housing quality</b>           |       |       |       |       |       |       |       |
| Residents per bedroom               | 7.673 | 7.702 | 7.696 | 7.728 | 7.601 | 7.407 | 7.392 |
| Floor: cement                       | RC    |
| Floor: mud/clay/earth               | 4.605 | 4.644 | 4.713 | 4.505 | 4.825 | 3.747 | 5.501 |
| Floor: ceramic tiles                | 1.355 | 1.369 | 1.385 | 1.394 | 1.309 | 1.411 | 1.255 |
| Floor: carpet                       | 1.019 | 1.018 | 1.019 | 1.020 | 1.023 | 1.020 | 1.025 |
| Floor: polished stone/marble/grani. | 1.324 | 1.326 | 1.332 | 1.357 | 1.304 | 1.335 | 1.240 |
| Floor: other                        | 1.007 | 1.007 | 1.007 | 1.007 | 1.008 | 1.005 | 1.013 |
| Floor: sand                         | 1.055 | 1.057 | 1.059 | 1.056 | 1.067 | 1.054 | 1.064 |
| Floor: dung                         | 1.929 | 1.942 | 1.956 | 1.909 | 1.996 | 1.767 | 2.221 |
| Floor: raw wood planks              | 1.117 | 1.114 | 1.109 | 1.107 | 1.111 | 1.084 | 1.121 |
| Floor: palm/bamboo                  | 1.048 | 1.046 | 1.044 | 1.048 | 1.039 | 1.036 | 1.067 |
| Floor: brick                        | 1.040 | 1.039 | 1.040 | 1.040 | 1.047 | 1.038 | 1.049 |
| Floor: stone                        | 1.195 | 1.196 | 1.191 | 1.199 | 1.159 | 1.199 | 1.172 |
| Floor: parquet/polished wood        | 1.015 | 1.015 | 1.014 | 1.016 | 1.021 | 1.012 | 1.014 |
| Floor: vinyl/asphalt strips         | 1.013 | 1.010 | 1.011 | 1.011 | 1.016 | 1.011 | 1.015 |
| Roof: RCC/RBC/cement/concrete       | RC    |
| Roof: no roof                       | 1.081 | 1.086 | 1.080 | 1.075 | 1.108 | 1.086 | 1.053 |
| Roof: loosely packed stone          | 1.155 | 1.155 | 1.160 | 1.150 | 1.161 | 1.155 | 1.193 |
| Roof: metal/GI                      | 1.753 | 1.734 | 1.723 | 1.720 | 1.641 | 1.743 | 1.796 |
| Roof: wood                          | 1.074 | 1.075 | 1.076 | 1.076 | 1.074 | 1.069 | 1.092 |
| Roof: calamine/cement fiber         | 1.107 | 1.110 | 1.109 | 1.106 | 1.108 | 1.107 | 1.106 |
| Roof: asbestos sheets               | 1.369 | 1.381 | 1.391 | 1.374 | 1.352 | 1.386 | 1.382 |
| Roof: roofing shingles              | 1.195 | 1.199 | 1.210 | 1.193 | 1.191 | 1.182 | 1.221 |
| Roof: tiles                         | 1.423 | 1.432 | 1.463 | 1.425 | 1.399 | 1.449 | 1.415 |
| Roof: slate                         | 1.503 | 1.503 | 1.519 | 1.493 | 1.496 | 1.493 | 1.580 |
| Roof: burnt brick                   | 1.392 | 1.399 | 1.397 | 1.369 | 1.379 | 1.333 | 1.491 |
| Roof: thatch/palm leaf              | 1.635 | 1.642 | 1.647 | 1.622 | 1.713 | 1.508 | 1.798 |
| Roof: other                         | 1.254 | 1.254 | 1.264 | 1.251 | 1.260 | 1.208 | 1.337 |
| Roof: mud                           | 1.077 | 1.076 | 1.079 | 1.077 | 1.079 | 1.070 | 1.089 |
| Roof: sod/mud and grass mixture     | 1.112 | 1.113 | 1.117 | 1.112 | 1.130 | 1.083 | 1.138 |
| Roof: plastic/polythene sheeting    | 1.076 | 1.076 | 1.080 | 1.078 | 1.089 | 1.071 | 1.081 |

|                                |        |        |        |        |        |        |        |
|--------------------------------|--------|--------|--------|--------|--------|--------|--------|
| Roof: rustic mat               | 1.012  | 1.013  | 1.014  | 1.012  | 1.014  | 1.012  | 1.016  |
| Roof: palm/bamboo              | 1.101  | 1.104  | 1.108  | 1.098  | 1.121  | 1.081  | 1.151  |
| Roof: raw wood planks/timber   | 1.038  | 1.041  | 1.040  | 1.041  | 1.041  | 1.040  | 1.040  |
| Roof: unburnt bricks           | 1.040  | 1.040  | 1.040  | 1.037  | 1.044  | 1.037  | 1.048  |
| Wall: cement/concrete          | RC     |
| Wall: no walls                 | 1.097  | 1.101  | 1.095  | 1.092  | 1.125  | 1.102  | 1.074  |
| Wall: raw/reused wood          | 1.089  | 1.086  | 1.083  | 1.084  | 1.093  | 1.067  | 1.083  |
| Wall: stone with lime/cement   | 1.292  | 1.294  | 1.303  | 1.283  | 1.270  | 1.289  | 1.331  |
| Wall: burnt bricks             | 2.827  | 2.837  | 2.871  | 2.719  | 3.107  | 2.324  | 3.473  |
| Wall: cement blocks            | 1.198  | 1.199  | 1.206  | 1.193  | 1.212  | 1.195  | 1.214  |
| Wall: wood planks/shingles     | 1.039  | 1.040  | 1.040  | 1.036  | 1.048  | 1.026  | 1.052  |
| Wall: GI/metal/asbestos sheets | 1.115  | 1.109  | 1.113  | 1.112  | 1.101  | 1.110  | 1.116  |
| Wall: other                    | 1.024  | 1.023  | 1.026  | 1.022  | 1.024  | 1.021  | 1.031  |
| Wall: cane/palm/trunks         | 1.304  | 1.298  | 1.306  | 1.294  | 1.305  | 1.218  | 1.387  |
| Wall: mud                      | 2.769  | 2.801  | 2.854  | 2.719  | 2.670  | 2.570  | 3.123  |
| Wall: grass/reeds/thatch       | 1.233  | 1.231  | 1.234  | 1.223  | 1.291  | 1.144  | 1.331  |
| Wall: bamboo with mud          | 1.582  | 1.575  | 1.586  | 1.551  | 1.581  | 1.402  | 1.783  |
| Wall: stone with mud           | 1.190  | 1.189  | 1.198  | 1.191  | 1.188  | 1.181  | 1.219  |
| Wall: plywood                  | 1.013  | 1.014  | 1.016  | 1.014  | 1.020  | 1.011  | 1.013  |
| Wall: cardboard                | 1.011  | 1.011  | 1.012  | 1.009  | 1.017  | 1.011  | 1.016  |
| Wall: unburnt brick            | 1.187  | 1.191  | 1.198  | 1.181  | 1.211  | 1.164  | 1.253  |
| <b>e) Other</b>                |        |        |        |        |        |        |        |
| Staff                          | 1.010  | 1.010  | 1.009  | 1.009  | 1.012  | 1.012  | 1.015  |
| Bank account                   | 9.014  | 9.022  | 8.895  | 9.212  | 8.602  | 10.702 | 8.109  |
| Electricity                    | 11.314 | 11.166 | 10.929 | 11.842 | 9.921  | 16.460 | 8.207  |
| Animal-drawn cart              | 1.144  | 1.146  | 1.146  | 1.147  | 1.143  | 1.164  | 1.135  |
| Land usable for agriculture    | 2.236  | 2.244  | 2.240  | 2.206  | 2.320  | 2.182  | 2.394  |
| Internet                       | 1.576  | 1.558  | 1.590  | 1.604  | 1.525  | 1.610  | 1.463  |
| Thresher                       | 1.265  | 1.267  | 1.262  | 1.256  | 1.316  | 1.226  | 1.315  |
| Tractor                        | 1.380  | 1.384  | 1.374  | 1.373  | 1.445  | 1.353  | 1.456  |
| Household member owns a house  | 5.685  | 5.676  | 5.640  | 5.555  | 5.619  | 5.445  | 6.171  |
| <b>Covariates</b>              |        |        |        |        |        |        |        |
| Birth interval (months)        | 4.507  | 4.516  | 4.536  | 4.467  | 4.582  | 4.230  | 4.265  |
| Birth order                    | 47.158 | 47.154 | 46.995 | 44.310 | 48.873 | 40.847 | 45.927 |
| Age (months)                   | 5.442  | 5.433  | 5.388  | 6.818  | 5.339  | 5.132  | 5.465  |
| Female                         | 1.946  | 1.943  | 1.945  | 1.934  | 1.948  | 1.920  | 1.934  |

|                                       |         |         |         |         |         |         |         |
|---------------------------------------|---------|---------|---------|---------|---------|---------|---------|
| First born                            | 4.540   | 4.550   | 4.577   | 4.660   | 4.376   | 5.264   | 3.888   |
| Delivered at home                     | 1.571   | 1.573   | 1.585   | 1.562   | 1.622   | 1.151   | 1.656   |
| Mother's age at birth (years)         | 253.305 | 253.635 | 252.371 | 257.965 | 250.966 | 278.150 | 236.979 |
| Mother's age at birth (years) squared | 83.328  | 83.388  | 83.003  | 84.334  | 82.591  | 88.807  | 78.382  |
| Mother's education: none              | RC      |
| Mother's education: primary           | 1.561   | 1.557   | 1.545   | 1.569   | 1.536   | 1.667   | 1.497   |
| Mother's education: secondary         | 3.509   | 3.501   | 3.471   | 3.628   | 3.257   | 4.306   | 2.788   |
| Mother's education: higher            | 1.928   | 1.913   | 1.962   | 2.066   | 1.840   | 2.208   | 1.611   |
| Maternal height (z-score)             | 5.751   | 5.800   | 5.756   | 5.644   | 5.832   | 5.522   | 6.105   |
| Received no vaccination               | 1.144   | 1.144   | 1.144   | 1.139   | 1.161   |         |         |
| Wealth quintile: first                | RC      |
| Wealth quintile: second               | 5.192   | 5.193   | 5.126   | 5.187   | 5.124   | 5.577   | 4.997   |
| Wealth quintile: third                | 11.439  | 11.391  | 11.117  | 11.620  | 11.061  | 13.353  | 9.973   |
| Wealth quintile: fourth               | 18.135  | 18.048  | 17.821  | 19.097  | 16.996  | 22.418  | 14.200  |
| Wealth quintile: fifth                | 22.486  | 22.439  | 22.783  | 24.665  | 21.372  | 28.241  | 16.253  |
| Caste/tribe: schedule caste           | RC      |
| Caste/tribe: schedule tribe           | 1.700   | 1.699   | 1.722   | 1.685   | 1.695   | 1.674   | 1.762   |
| Caste/tribe: other backward class     | 3.162   | 3.164   | 3.212   | 3.173   | 3.261   | 3.155   | 3.206   |
| Caste/tribe: none of them             | 2.023   | 2.028   | 2.044   | 2.064   | 2.017   | 2.125   | 1.889   |
| Caste/tribe: don't know               | 1.061   | 1.061   | 1.049   | 1.060   | 1.054   | 1.074   | 1.050   |
| Siblings ever born                    | 48.711  | 48.641  | 48.705  | 45.890  | 51.244  | 40.314  | 47.979  |
| Singleton birth                       | RC      |
| First born twin/triplet etc.          | 1.065   | 1.065   | 1.065   | 1.062   | 1.063   | 1.087   | 1.100   |
| Later born twin/triplet etc.          | 1.050   | 1.051   | 1.051   | 1.051   | 1.051   | 1.079   | 1.081   |

Table A9. Results from conditional Poisson models. Full output for table 4.

|                                       | <u>Stunting</u>            | <u>Underweight</u>         | <u>Wasting</u>             | <u>Anemia</u>              | <u>Diarrhea</u>           | <u>Low birth weight</u>    | <u>Mortality</u>           | <u>Proportion (households)</u> |
|---------------------------------------|----------------------------|----------------------------|----------------------------|----------------------------|---------------------------|----------------------------|----------------------------|--------------------------------|
| <b>a) Water and toilet facilities</b> |                            |                            |                            |                            |                           |                            |                            |                                |
| Water pump                            | 0.973**<br>[0.951, 0.996]  | 0.990<br>[0.966, 1.015]    | 1.010<br>[0.976, 1.046]    | 1.010<br>[0.996, 1.025]    | 0.969<br>[0.922, 1.019]   | 0.928***<br>[0.891, 0.967] | 0.968<br>[0.890, 1.054]    | 0.172<br>[0.169, 0.176]        |
| Toilet: no facility/bush/field        | RC                         | RC                         | RC                         | RC                         | RC                        | RC                         | RC                         | 0.389<br>[0.383, 0.395]        |
| Toilet: flush to piped sewer system   | 0.931***<br>[0.886, 0.978] | 0.982<br>[0.931, 1.036]    | 1.001<br>[0.936, 1.071]    | 0.994<br>[0.966, 1.022]    | 0.966<br>[0.869, 1.074]   | 0.911**<br>[0.844, 0.984]  | 0.652***<br>[0.522, 0.814] | 0.078<br>[0.074, 0.083]        |
| Toilet: composting toilet             | 0.979<br>[0.751, 1.277]    | 1.021<br>[0.792, 1.316]    | 1.116<br>[0.762, 1.634]    | 0.992<br>[0.833, 1.180]    | 1.301<br>[0.695, 2.436]   | 0.799<br>[0.468, 1.363]    | 0.438<br>[0.084, 2.292]    | 0.001<br>[0.001, 0.001]        |
| Toilet: dry toilet                    | 0.828**<br>[0.690, 0.995]  | 0.855<br>[0.701, 1.043]    | 0.887<br>[0.690, 1.140]    | 0.902*<br>[0.813, 1.002]   | 0.891<br>[0.589, 1.350]   | 1.550***<br>[1.167, 2.058] | 1.229<br>[0.739, 2.044]    | 0.004<br>[0.003, 0.004]        |
| Toilet: other                         | 0.866<br>[0.649, 1.155]    | 0.910<br>[0.689, 1.202]    | 0.777<br>[0.538, 1.123]    | 1.059<br>[0.915, 1.226]    | 0.509<br>[0.195, 1.329]   | 0.686<br>[0.377, 1.248]    | 0.158<br>[0.018, 1.429]    | 0.001<br>[0.001, 0.001]        |
| Toilet: sh. Flush to piped sewer s.   | 1.112***<br>[1.031, 1.198] | 1.000<br>[0.927, 1.080]    | 0.894*<br>[0.796, 1.004]   | 1.016<br>[0.973, 1.061]    | 0.888<br>[0.744, 1.058]   | 0.909<br>[0.806, 1.026]    | 0.870<br>[0.642, 1.179]    | 0.012<br>[0.010, 0.013]        |
| Toilet: shared flush to septic tank   | 0.940***<br>[0.906, 0.974] | 0.943***<br>[0.908, 0.979] | 0.978<br>[0.925, 1.035]    | 0.991<br>[0.970, 1.013]    | 1.086**<br>[1.007, 1.172] | 1.056*<br>[0.992, 1.124]   | 1.010<br>[0.883, 1.154]    | 0.054<br>[0.052, 0.057]        |
| Toilet: shared flush to pit latrine   | 0.934**<br>[0.878, 0.994]  | 0.948<br>[0.887, 1.014]    | 0.954<br>[0.867, 1.050]    | 0.984<br>[0.946, 1.025]    | 1.083<br>[0.934, 1.257]   | 0.862***<br>[0.773, 0.960] | 1.047<br>[0.832, 1.316]    | 0.014<br>[0.013, 0.015]        |
| Toilet: sh. Flush to somewhere else   | 0.544***<br>[0.449, 0.660] | 0.828***<br>[0.727, 0.943] | 1.423***<br>[1.201, 1.686] | 1.061<br>[0.985, 1.142]    | 1.403**<br>[1.048, 1.878] | 1.567***<br>[1.360, 1.807] | 2.116**<br>[1.137, 3.938]  | 0.004<br>[0.003, 0.005]        |
| Toilet: sh. Flush don't know where    | 1.122<br>[0.881, 1.428]    | 1.143<br>[0.882, 1.480]    | 1.227<br>[0.961, 1.565]    | 1.176<br>[0.955, 1.448]    | 0.175<br>[0.017, 1.839]   | 1.040<br>[0.646, 1.674]    | 2.040<br>[0.705, 5.905]    | 0.000<br>[0.000, 0.000]        |
| Toilet: sh. Ventilated improved pit   | 0.825*<br>[0.658, 1.034]   | 0.718**<br>[0.550, 0.937]  | 0.697*<br>[0.483, 1.007]   | 1.069<br>[0.933, 1.225]    | 0.856<br>[0.500, 1.467]   | 1.410*<br>[0.982, 2.023]   | 1.019<br>[0.358, 2.896]    | 0.001<br>[0.001, 0.002]        |
| Toilet: shared pit latrine w/ slab    | 0.947<br>[0.874, 1.025]    | 1.069*<br>[0.989, 1.156]   | 1.004<br>[0.892, 1.130]    | 1.003<br>[0.953, 1.055]    | 1.071<br>[0.858, 1.337]   | 0.978<br>[0.856, 1.118]    | 0.931<br>[0.707, 1.225]    | 0.009<br>[0.009, 0.010]        |
| Toilet: flush to septic tank          | 0.943***<br>[0.919, 0.968] | 0.946***<br>[0.920, 0.973] | 0.996<br>[0.959, 1.036]    | 0.969***<br>[0.953, 0.985] | 0.977<br>[0.921, 1.036]   | 0.950**<br>[0.908, 0.995]  | 0.841***<br>[0.762, 0.928] | 0.287<br>[0.283, 0.292]        |
| Toilet: sh. Pit w/o slab/open pit     | 1.015<br>[0.866, 1.190]    | 1.133<br>[0.958, 1.340]    | 1.221<br>[0.938, 1.589]    | 1.085<br>[0.949, 1.240]    | 1.634**<br>[1.107, 2.412] | 1.055<br>[0.772, 1.441]    | 0.772<br>[0.407, 1.465]    | 0.003<br>[0.003, 0.003]        |
| Toilet: shared composting toilet      | 0.907                      | 1.062                      | 0.390*                     | 0.687**                    | 0.265                     | 0.349**                    | 1.141                      | 0.000                          |

|                                   |                |                |                |                |                |                |                |                |
|-----------------------------------|----------------|----------------|----------------|----------------|----------------|----------------|----------------|----------------|
|                                   | [0.672, 1.224] | [0.777, 1.451] | [0.146, 1.047] | [0.489, 0.965] | [0.015, 4.598] | [0.139, 0.874] | [0.181, 7.192] | [0.000, 0.001] |
| Toilet: shared dry toilet         | 0.964          | 1.104          | 0.946          | 1.038          | 0.626          | 0.390***       | 1.144          | 0.001          |
|                                   | [0.740, 1.256] | [0.815, 1.495] | [0.564, 1.589] | [0.897, 1.202] | [0.281, 1.397] | [0.249, 0.610] | [0.404, 3.238] | [0.001, 0.001] |
| Toilet: shared other              | 0.975          | 1.163          | 1.334***       | 1.136***       | 0.720          | 1.705***       | 1.439          | 0.002          |
|                                   | [0.767, 1.239] | [0.944, 1.432] | [1.080, 1.648] | [1.039, 1.242] | [0.380, 1.366] | [1.213, 2.395] | [0.761, 2.722] | [0.001, 0.002] |
| Toilet: flush to pit latrine      | 0.976          | 0.996          | 0.968          | 0.962***       | 1.007          | 0.935**        | 0.835**        | 0.072          |
|                                   | [0.941, 1.013] | [0.958, 1.036] | [0.916, 1.022] | [0.940, 0.985] | [0.923, 1.098] | [0.877, 0.997] | [0.725, 0.961] | [0.070, 0.074] |
| Toilet: flush to somewhere else   | 0.945          | 1.067          | 0.857**        | 1.019          | 0.728**        | 0.848**        | 1.009          | 0.009          |
|                                   | [0.855, 1.045] | [0.968, 1.176] | [0.752, 0.977] | [0.957, 1.086] | [0.541, 0.980] | [0.725, 0.990] | [0.707, 1.442] | [0.008, 0.010] |
| Toilet: flush don't know where    | 1.155          | 0.759          | 0.964          | 1.080          | 1.623          | 1.010          | 0.645          | 0.001          |
|                                   | [0.877, 1.521] | [0.547, 1.055] | [0.639, 1.455] | [0.929, 1.255] | [0.867, 3.038] | [0.661, 1.543] | [0.232, 1.792] | [0.001, 0.001] |
| Toilet: ventilated improved pit   | 0.958          | 0.904          | 0.791**        | 0.953          | 0.995          | 0.913          | 1.614***       | 0.006          |
|                                   | [0.846, 1.085] | [0.791, 1.032] | [0.657, 0.951] | [0.877, 1.036] | [0.764, 1.295] | [0.757, 1.100] | [1.171, 2.225] | [0.005, 0.006] |
| Toilet: pit latrine with slab     | 0.946**        | 0.917***       | 0.917**        | 0.960**        | 1.056          | 0.983          | 0.901          | 0.039          |
|                                   | [0.899, 0.995] | [0.870, 0.967] | [0.851, 0.988] | [0.929, 0.991] | [0.935, 1.193] | [0.907, 1.066] | [0.747, 1.088] | [0.038, 0.041] |
| Toilet: pit without slab/open pit | 0.970          | 0.982          | 1.067          | 0.951          | 1.257*         | 0.973          | 0.840          | 0.011          |
|                                   | [0.880, 1.069] | [0.886, 1.089] | [0.932, 1.220] | [0.882, 1.027] | [1.000, 1.581] | [0.834, 1.135] | [0.585, 1.207] | [0.011, 0.012] |
| Water: tube well or borehole      | RC             | 0.392          |
|                                   |                |                |                |                |                |                |                | [0.386, 0.399] |
| Water: piped into dwelling        | 0.976          | 1.000          | 0.968          | 0.994          | 0.987          | 1.019          | 0.724***       | 0.166          |
|                                   | [0.942, 1.012] | [0.962, 1.039] | [0.920, 1.019] | [0.973, 1.015] | [0.910, 1.070] | [0.962, 1.080] | [0.627, 0.836] | [0.161, 0.171] |
| Water: rainwater                  | 1.196          | 1.026          | 0.811          | 0.874          | 1.166          | 0.970          | 0.878          | 0.002          |
|                                   | [0.916, 1.562] | [0.769, 1.368] | [0.519, 1.267] | [0.712, 1.073] | [0.571, 2.384] | [0.592, 1.591] | [0.271, 2.847] | [0.001, 0.002] |
| Water: tanker truck               | 1.060          | 0.940          | 0.966          | 0.957*         | 1.148          | 0.925          | 0.933          | 0.013          |
|                                   | [0.976, 1.152] | [0.861, 1.027] | [0.850, 1.099] | [0.909, 1.007] | [0.939, 1.403] | [0.817, 1.047] | [0.706, 1.234] | [0.011, 0.016] |
| Water: cart with small tank       | 0.732**        | 0.947          | 1.243          | 0.832***       | 0.878          | 0.836          | 1.245          | 0.002          |
|                                   | [0.575, 0.934] | [0.724, 1.238] | [0.912, 1.695] | [0.735, 0.941] | [0.558, 1.381] | [0.596, 1.173] | [0.624, 2.484] | [0.001, 0.002] |
| Water: bottled water              | 0.975          | 0.926**        | 0.880***       | 0.983          | 1.156***       | 0.914**        | 0.792**        | 0.031          |
|                                   | [0.924, 1.030] | [0.873, 0.983] | [0.813, 0.953] | [0.952, 1.016] | [1.037, 1.288] | [0.843, 0.992] | [0.634, 0.990] | [0.029, 0.033] |
| Water: community RO plant         | 0.920          | 0.816***       | 0.974          | 0.919**        | 1.275**        | 0.930          | 0.819          | 0.005          |
|                                   | [0.812, 1.043] | [0.704, 0.945] | [0.816, 1.162] | [0.850, 0.992] | [1.005, 1.619] | [0.765, 1.130] | [0.538, 1.247] | [0.005, 0.006] |
| Water: other                      | 0.977          | 0.907          | 0.848          | 1.043          | 1.629**        | 0.782          | 1.217          | 0.002          |
|                                   | [0.791, 1.208] | [0.743, 1.107] | [0.592, 1.213] | [0.914, 1.191] | [1.120, 2.367] | [0.497, 1.232] | [0.615, 2.411] | [0.001, 0.002] |
| Water: piped to yard/plot         | 1.023          | 1.002          | 0.940**        | 0.972***       | 1.026          | 1.013          | 0.857**        | 0.136          |
|                                   | [0.989, 1.057] | [0.968, 1.037] | [0.896, 0.986] | [0.952, 0.993] | [0.951, 1.106] | [0.959, 1.070] | [0.751, 0.977] | [0.132, 0.139] |
| Water: public tap/standpipe       | 1.025*         | 1.005          | 1.014          | 0.997          | 1.053          | 1.009          | 1.018          | 0.159          |

|                                        |                |                |                |                |                |                |                 |                |
|----------------------------------------|----------------|----------------|----------------|----------------|----------------|----------------|-----------------|----------------|
| Water: protected well                  | 1.019          | 1.024          | 0.973          | 1.043**        | 1.020          | 1.132**        | 0.896           | 0.037          |
|                                        | [0.996, 1.054] | [0.976, 1.036] | [0.971, 1.059] | [0.979, 1.016] | [0.981, 1.131] | [0.959, 1.061] | [0.911, 1.139]  | [0.155, 0.163] |
| Water: unprotected well                | 0.974          | 0.981          | 1.034          | 0.999          | 0.938          | 1.056          | 0.950           | 0.042          |
|                                        | [0.958, 1.083] | [0.962, 1.090] | [0.896, 1.058] | [1.004, 1.084] | [0.872, 1.192] | [1.030, 1.244] | [0.666, 1.206]  | [0.034, 0.039] |
| Water: protected spring                | 0.898          | 0.939          | 1.032          | 0.978          | 1.125          | 1.071          | 0.640           | 0.003          |
|                                        | [0.936, 1.012] | [0.942, 1.021] | [0.974, 1.097] | [0.972, 1.026] | [0.842, 1.046] | [0.979, 1.140] | [0.813, 1.109]  | [0.041, 0.044] |
| Water: unprotected spring              | 0.943          | 0.904          | 0.884          | 0.959          | 0.887          | 1.156          | 0.976           | 0.004          |
|                                        | [0.673, 1.197] | [0.709, 1.244] | [0.737, 1.444] | [0.823, 1.162] | [0.635, 1.992] | [0.761, 1.508] | [0.173, 2.366]  | [0.003, 0.004] |
| Water: river/dam/lake/ponds etc.       | 0.955          | 0.933          | 1.090          | 0.952          | 1.048          | 1.019          | 0.936           | 0.007          |
|                                        | [0.801, 1.111] | [0.770, 1.062] | [0.699, 1.118] | [0.859, 1.071] | [0.570, 1.380] | [0.917, 1.458] | [0.442, 2.155]  | [0.004, 0.004] |
|                                        | [0.827, 1.101] | [0.806, 1.079] | [0.891, 1.334] | [0.862, 1.052] | [0.707, 1.555] | [0.797, 1.303] | [0.538, 1.629]  | [0.006, 0.007] |
| <b>b) Food storage and preparation</b> |                |                |                |                |                |                |                 |                |
| Refrigerator                           | 0.954***       | 0.943***       | 0.947***       | 1.000          | 1.012          | 0.972          | 0.929           | 0.296          |
|                                        | [0.926, 0.982] | [0.914, 0.972] | [0.910, 0.987] | [0.984, 1.017] | [0.951, 1.077] | [0.931, 1.015] | [0.830, 1.040]  | [0.291, 0.302] |
| Pressure cooker                        | 0.973***       | 0.953***       | 0.993          | 0.978***       | 1.045*         | 0.944***       | 0.986           | 0.566          |
|                                        | [0.954, 0.992] | [0.933, 0.973] | [0.962, 1.025] | [0.965, 0.991] | [0.997, 1.095] | [0.910, 0.980] | [0.913, 1.064]  | [0.561, 0.572] |
| Cooking: wood                          | RC              | 0.405          |
|                                        |                |                |                |                |                |                |                 | [0.399, 0.411] |
| Cooking: electricity                   | 1.081          | 0.988          | 1.058          | 1.028          | 0.922          | 0.980          | 1.518**         | 0.006          |
|                                        | [0.958, 1.220] | [0.858, 1.136] | [0.860, 1.302] | [0.941, 1.123] | [0.670, 1.268] | [0.780, 1.232] | [1.027, 2.244]  | [0.006, 0.007] |
| Cooking: animal dung                   | 1.022*         | 1.033**        | 0.993          | 1.014          | 1.085***       | 1.021          | 1.092*          | 0.072          |
|                                        | [0.997, 1.047] | [1.006, 1.061] | [0.949, 1.038] | [0.997, 1.031] | [1.023, 1.149] | [0.959, 1.087] | [0.995, 1.198]  | [0.069, 0.074] |
| Cooking: no food cooked in house       | 2.917***       | 4.285***       | 2.894**        | 1.139          | 0.993          | 0.000***       | 4.831           | 0.003          |
|                                        | [1.365, 6.232] | [1.967, 9.336] | [1.258, 6.660] | [0.929, 1.396] | [0.378, 2.608] | [0.000, 0.000] | [0.414, 56.380] | [0.002, 0.003] |
| Cooking: other                         | 1.275          | 1.092          | 0.797          | 1.089          | 1.028          | 1.006          | 0.202           | 0.000          |
|                                        | [0.828, 1.963] | [0.680, 1.753] | [0.423, 1.502] | [0.682, 1.739] | [0.368, 2.873] | [0.435, 2.327] | [0.006, 6.695]  | [0.000, 0.001] |
| Cooking: LPG/natural gas               | 0.962***       | 0.958***       | 0.970          | 1.002          | 1.058*         | 0.942***       | 0.948           | 0.423          |
|                                        | [0.936, 0.989] | [0.931, 0.986] | [0.932, 1.010] | [0.985, 1.019] | [0.997, 1.123] | [0.901, 0.985] | [0.853, 1.053]  | [0.416, 0.430] |
| Cooking: biogas                        | 0.902**        | 0.919          | 0.822**        | 1.109***       | 0.677***       | 0.996          | 1.572**         | 0.008          |
|                                        | [0.816, 0.998] | [0.825, 1.024] | [0.705, 0.958] | [1.047, 1.174] | [0.519, 0.884] | [0.859, 1.155] | [1.035, 2.385]  | [0.007, 0.009] |
| Cooking: kerosene                      | 0.988          | 1.055          | 1.101*         | 0.973          | 0.913          | 1.197***       | 0.894           | 0.012          |
|                                        | [0.917, 1.065] | [0.982, 1.133] | [0.999, 1.213] | [0.929, 1.019] | [0.759, 1.100] | [1.071, 1.339] | [0.645, 1.238]  | [0.011, 0.013] |
| Cooking: coal, lignite                 | 1.033          | 1.078*         | 1.174***       | 0.962          | 1.092          | 0.885          | 0.926           | 0.009          |
|                                        | [0.960, 1.110] | [0.997, 1.165] | [1.047, 1.316] | [0.915, 1.013] | [0.909, 1.313] | [0.746, 1.049] | [0.687, 1.248]  | [0.008, 0.010] |
| Cooking: charcoal                      | 0.995          | 1.028          | 0.907          | 0.977          | 1.025          | 0.784**        | 1.419*          | 0.006          |
|                                        | [0.912, 1.086] | [0.946, 1.118] | [0.782, 1.053] | [0.921, 1.035] | [0.807, 1.302] | [0.648, 0.949] | [0.978, 2.060]  | [0.005, 0.006] |

|                                |                            |                            |                            |                            |                            |                            |                            |                         |
|--------------------------------|----------------------------|----------------------------|----------------------------|----------------------------|----------------------------|----------------------------|----------------------------|-------------------------|
| Cooking: straw/shrubs/grass    | 1.039**<br>[1.008, 1.070]  | 1.035**<br>[1.001, 1.072]  | 1.025<br>[0.969, 1.083]    | 1.028**<br>[1.005, 1.052]  | 0.942<br>[0.872, 1.019]    | 1.133***<br>[1.052, 1.221] | 0.991<br>[0.872, 1.125]    | 0.025<br>[0.024, 0.027] |
| Cooking: agricultural crop     | 1.031*<br>[0.999, 1.065]   | 1.068***<br>[1.030, 1.108] | 1.043<br>[0.987, 1.103]    | 1.004<br>[0.980, 1.028]    | 1.064<br>[0.977, 1.159]    | 1.085*<br>[0.999, 1.178]   | 1.021<br>[0.896, 1.163]    | 0.030<br>[0.028, 0.032] |
| <b>c) Other consumer goods</b> |                            |                            |                            |                            |                            |                            |                            |                         |
| Radio                          | 0.979<br>[0.951, 1.007]    | 1.004<br>[0.973, 1.035]    | 1.014<br>[0.970, 1.059]    | 1.018*<br>[0.999, 1.037]   | 1.025<br>[0.961, 1.093]    | 1.070***<br>[1.019, 1.124] | 0.966<br>[0.865, 1.079]    | 0.081<br>[0.080, 0.083] |
| Bicycle                        | 0.976***<br>[0.961, 0.990] | 0.980**<br>[0.965, 0.996]  | 1.035***<br>[1.011, 1.059] | 0.989**<br>[0.979, 0.998]  | 0.970*<br>[0.936, 1.005]   | 0.982<br>[0.955, 1.010]    | 1.007<br>[0.949, 1.067]    | 0.521<br>[0.516, 0.526] |
| Motorcycle/scooter             | 0.952***<br>[0.935, 0.970] | 0.957***<br>[0.939, 0.976] | 0.972**<br>[0.946, 0.999]  | 0.991<br>[0.979, 1.002]    | 0.937***<br>[0.899, 0.976] | 0.976<br>[0.946, 1.007]    | 0.885***<br>[0.826, 0.949] | 0.377<br>[0.372, 0.381] |
| Car/truck                      | 0.927***<br>[0.877, 0.980] | 0.900***<br>[0.850, 0.953] | 0.941*<br>[0.883, 1.004]   | 0.988<br>[0.959, 1.018]    | 0.947<br>[0.853, 1.051]    | 1.048<br>[0.979, 1.123]    | 1.009<br>[0.833, 1.221]    | 0.060<br>[0.058, 0.063] |
| Telephone (land-line)          | 0.926**<br>[0.866, 0.990]  | 1.032<br>[0.965, 1.103]    | 1.070*<br>[0.994, 1.151]   | 0.986<br>[0.951, 1.022]    | 0.951<br>[0.836, 1.081]    | 1.047<br>[0.961, 1.141]    | 0.959<br>[0.762, 1.206]    | 0.039<br>[0.037, 0.041] |
| Mobile telephone               | 0.968***<br>[0.946, 0.991] | 0.946***<br>[0.923, 0.969] | 0.921***<br>[0.886, 0.959] | 0.981**<br>[0.964, 0.998]  | 1.015<br>[0.949, 1.086]    | 0.909***<br>[0.864, 0.958] | 1.071<br>[0.972, 1.181]    | 0.904<br>[0.902, 0.906] |
| Watch                          | 0.989<br>[0.973, 1.005]    | 1.011<br>[0.994, 1.029]    | 1.018<br>[0.990, 1.047]    | 0.985***<br>[0.973, 0.996] | 0.979<br>[0.938, 1.021]    | 1.023<br>[0.987, 1.060]    | 0.922**<br>[0.863, 0.984]  | 0.781<br>[0.778, 0.785] |
| Mattress                       | 0.985*<br>[0.969, 1.002]   | 0.999<br>[0.981, 1.017]    | 0.986<br>[0.959, 1.014]    | 0.992<br>[0.980, 1.003]    | 0.983<br>[0.943, 1.026]    | 0.990<br>[0.956, 1.024]    | 0.983<br>[0.918, 1.051]    | 0.667<br>[0.662, 0.672] |
| Chair                          | 0.990<br>[0.974, 1.007]    | 0.996<br>[0.978, 1.014]    | 0.993<br>[0.965, 1.021]    | 0.995<br>[0.983, 1.007]    | 0.980<br>[0.938, 1.023]    | 0.972<br>[0.937, 1.007]    | 0.958<br>[0.894, 1.025]    | 0.762<br>[0.758, 0.765] |
| Cot/bed                        | 1.012<br>[0.989, 1.035]    | 0.998<br>[0.974, 1.022]    | 0.982<br>[0.949, 1.017]    | 1.013<br>[0.997, 1.028]    | 0.943*<br>[0.888, 1.001]   | 1.007<br>[0.966, 1.051]    | 0.819***<br>[0.745, 0.901] | 0.884<br>[0.881, 0.887] |
| Table                          | 1.011<br>[0.993, 1.029]    | 1.005<br>[0.986, 1.024]    | 0.968**<br>[0.942, 0.996]  | 0.990*<br>[0.978, 1.001]   | 0.907***<br>[0.869, 0.945] | 0.969*<br>[0.938, 1.002]   | 1.011<br>[0.942, 1.085]    | 0.554<br>[0.550, 0.559] |
| Electric fan                   | 0.981*<br>[0.958, 1.004]   | 0.984<br>[0.960, 1.009]    | 0.962**<br>[0.925, 1.000]  | 0.993<br>[0.976, 1.009]    | 0.971<br>[0.914, 1.031]    | 0.990<br>[0.942, 1.041]    | 0.939<br>[0.856, 1.030]    | 0.782<br>[0.777, 0.786] |
| Black and white television     | 0.982<br>[0.946, 1.020]    | 0.963*<br>[0.926, 1.002]   | 0.941**<br>[0.888, 0.998]  | 0.985<br>[0.963, 1.009]    | 1.046<br>[0.965, 1.133]    | 1.093***<br>[1.024, 1.168] | 1.035<br>[0.907, 1.181]    | 0.033<br>[0.032, 0.034] |
| Color television               | 0.977**<br>[0.958, 0.997]  | 0.979*<br>[0.959, 1.000]   | 1.004<br>[0.973, 1.035]    | 0.992<br>[0.979, 1.005]    | 0.985<br>[0.939, 1.032]    | 0.959**<br>[0.923, 0.996]  | 0.957<br>[0.886, 1.034]    | 0.635<br>[0.630, 0.640] |
| Sewing machine                 | 0.976**<br>[0.956, 0.995]  | 0.984<br>[0.963, 1.005]    | 0.996<br>[0.967, 1.025]    | 0.991<br>[0.979, 1.003]    | 1.020<br>[0.977, 1.064]    | 0.981<br>[0.948, 1.016]    | 0.898***<br>[0.832, 0.970] | 0.240<br>[0.237, 0.243] |
| Computer                       | 1.017                      | 0.961                      | 1.026                      | 0.954***                   | 0.983                      | 0.953                      | 0.863                      | 0.090                   |

|                                     |                |                |                |                |                |                |                 |                |
|-------------------------------------|----------------|----------------|----------------|----------------|----------------|----------------|-----------------|----------------|
|                                     | [0.967, 1.069] | [0.911, 1.013] | [0.964, 1.093] | [0.928, 0.982] | [0.897, 1.077] | [0.891, 1.021] | [0.708, 1.051]  | [0.087, 0.093] |
| Air conditioner/cooler              | 1.025*         | 1.038**        | 1.018          | 0.999          | 1.091***       | 0.977          | 0.925           | 0.179          |
|                                     | [0.996, 1.055] | [1.006, 1.070] | [0.977, 1.060] | [0.982, 1.016] | [1.029, 1.157] | [0.934, 1.022] | [0.832, 1.028]  | [0.175, 0.183] |
| Washing machine                     | 0.960*         | 0.979          | 0.925***       | 0.980*         | 1.035          | 0.968          | 0.857*          | 0.136          |
|                                     | [0.920, 1.003] | [0.936, 1.023] | [0.877, 0.976] | [0.959, 1.003] | [0.955, 1.121] | [0.915, 1.025] | [0.733, 1.001]  | [0.132, 0.140] |
| <b>d) Housing quality</b>           |                |                |                |                |                |                |                 |                |
| Residents per bedroom               | 1.008***       | 1.006***       | 0.996          | 1.000          | 0.999          | 1.002          | 0.731***        | 2.917          |
|                                     | [1.004, 1.012] | [1.002, 1.010] | [0.989, 1.002] | [0.997, 1.002] | [0.989, 1.009] | [0.993, 1.010] | [0.716, 0.747]  | [2.905, 2.929] |
| Floor: cement                       | RC              | 0.393          |
|                                     |                |                |                |                |                |                |                 | [0.388, 0.397] |
| Floor: mud/clay/earth               | 1.026**        | 1.004          | 0.993          | 1.003          | 1.011          | 1.025          | 1.093*          | 0.271          |
|                                     | [1.001, 1.052] | [0.978, 1.031] | [0.953, 1.034] | [0.986, 1.020] | [0.953, 1.073] | [0.976, 1.076] | [0.990, 1.207]  | [0.266, 0.276] |
| Floor: ceramic tiles                | 1.052***       | 0.975          | 0.976          | 0.987          | 0.956          | 1.030          | 1.059           | 0.106          |
|                                     | [1.017, 1.088] | [0.941, 1.010] | [0.933, 1.021] | [0.968, 1.006] | [0.888, 1.030] | [0.982, 1.080] | [0.921, 1.218]  | [0.102, 0.110] |
| Floor: carpet                       | 1.049          | 1.017          | 1.090          | 1.075*         | 0.981          | 1.207**        | 0.827           | 0.006          |
|                                     | [0.921, 1.195] | [0.891, 1.162] | [0.936, 1.269] | [0.997, 1.158] | [0.748, 1.288] | [1.019, 1.430] | [0.422, 1.623]  | [0.005, 0.006] |
| Floor: polished stone/marble/grani. | 0.980          | 0.932***       | 0.977          | 0.962***       | 0.869***       | 0.949*         | 1.050           | 0.077          |
|                                     | [0.940, 1.022] | [0.891, 0.974] | [0.926, 1.030] | [0.941, 0.984] | [0.799, 0.946] | [0.895, 1.006] | [0.891, 1.237]  | [0.074, 0.080] |
| Floor: other                        | 0.731          | 0.714          | 1.117          | 0.917          | 0.931          | 0.988          | 1.751           | 0.001          |
|                                     | [0.479, 1.114] | [0.453, 1.124] | [0.676, 1.846] | [0.697, 1.206] | [0.406, 2.134] | [0.536, 1.823] | [0.432, 7.104]  | [0.001, 0.001] |
| Floor: sand                         | 1.046          | 1.086**        | 1.058          | 0.964          | 1.371***       | 1.029          | 1.184           | 0.007          |
|                                     | [0.972, 1.126] | [1.006, 1.173] | [0.942, 1.189] | [0.917, 1.013] | [1.147, 1.639] | [0.893, 1.187] | [0.892, 1.573]  | [0.007, 0.007] |
| Floor: dung                         | 1.027          | 1.010          | 0.955*         | 1.016          | 0.982          | 1.009          | 1.070           | 0.070          |
|                                     | [0.995, 1.061] | [0.976, 1.045] | [0.905, 1.008] | [0.994, 1.038] | [0.909, 1.062] | [0.944, 1.078] | [0.949, 1.206]  | [0.068, 0.072] |
| Floor: raw wood planks              | 0.940          | 0.943          | 0.986          | 0.843          | 1.174          | 1.219          | 1.222           | 0.002          |
|                                     | [0.667, 1.326] | [0.623, 1.428] | [0.565, 1.721] | [0.646, 1.100] | [0.534, 2.577] | [0.703, 2.113] | [0.368, 4.064]  | [0.002, 0.003] |
| Floor: palm/bamboo                  | 0.954          | 0.951          | 0.985          | 0.969          | 1.088          | 0.894          | 1.391           | 0.002          |
|                                     | [0.675, 1.347] | [0.677, 1.335] | [0.613, 1.583] | [0.753, 1.247] | [0.529, 2.237] | [0.547, 1.462] | [0.513, 3.772]  | [0.002, 0.002] |
| Floor: brick                        | 1.011          | 1.068          | 1.057          | 0.971          | 1.109          | 0.955          | 1.174           | 0.008          |
|                                     | [0.937, 1.090] | [0.985, 1.157] | [0.937, 1.192] | [0.928, 1.017] | [0.942, 1.307] | [0.827, 1.103] | [0.877, 1.572]  | [0.007, 0.008] |
| Floor: stone                        | 1.013          | 0.955**        | 0.935**        | 0.967***       | 0.810***       | 0.900***       | 1.135           | 0.055          |
|                                     | [0.974, 1.054] | [0.916, 0.996] | [0.881, 0.992] | [0.943, 0.991] | [0.732, 0.897] | [0.845, 0.959] | [0.969, 1.329]  | [0.052, 0.057] |
| Floor: parquet/polished wood        | 1.077          | 0.953          | 1.278          | 0.970          | 1.327          | 0.837          | 0.641           | 0.002          |
|                                     | [0.838, 1.383] | [0.713, 1.275] | [0.926, 1.765] | [0.803, 1.173] | [0.817, 2.155] | [0.542, 1.293] | [0.104, 3.949]  | [0.002, 0.002] |
| Floor: vinyl/asphalt strips         | 1.301          | 1.455**        | 1.704***       | 0.881          | 2.198*         | 0.923          | 0.587           | 0.002          |
|                                     | [0.845, 2.002] | [1.014, 2.088] | [1.185, 2.451] | [0.679, 1.144] | [0.949, 5.091] | [0.550, 1.549] | [0.032, 10.883] | [0.001, 0.002] |

|                                  |                            |                            |                            |                            |                           |                            |                            |                         |
|----------------------------------|----------------------------|----------------------------|----------------------------|----------------------------|---------------------------|----------------------------|----------------------------|-------------------------|
| Roof: RCC/RBC/cement/concrete    | RC                         | RC                         | RC                         | RC                         | RC                        | RC                         | RC                         | 0.413<br>[0.408, 0.419] |
| Roof: no roof                    | 1.054<br>[0.936, 1.186]    | 1.079<br>[0.948, 1.229]    | 1.042<br>[0.848, 1.281]    | 0.949<br>[0.865, 1.040]    | 0.948<br>[0.715, 1.257]   | 1.173<br>[0.927, 1.483]    | 1.053<br>[0.594, 1.867]    | 0.002<br>[0.002, 0.002] |
| Roof: loosely packed stone       | 1.044*<br>[0.993, 1.099]   | 1.050*<br>[0.995, 1.108]   | 1.020<br>[0.937, 1.110]    | 0.979<br>[0.947, 1.013]    | 0.953<br>[0.841, 1.081]   | 1.043<br>[0.947, 1.150]    | 1.074<br>[0.889, 1.298]    | 0.023<br>[0.022, 0.025] |
| Roof: metal/GI                   | 0.991<br>[0.958, 1.026]    | 1.015<br>[0.981, 1.051]    | 1.037<br>[0.986, 1.090]    | 1.015<br>[0.993, 1.038]    | 1.068<br>[0.980, 1.163]   | 0.976<br>[0.919, 1.036]    | 1.088<br>[0.938, 1.262]    | 0.110<br>[0.106, 0.113] |
| Roof: wood                       | 1.002<br>[0.940, 1.067]    | 1.059*<br>[0.993, 1.130]   | 0.955<br>[0.862, 1.057]    | 0.958**<br>[0.920, 0.997]  | 0.992<br>[0.852, 1.156]   | 1.051<br>[0.931, 1.188]    | 1.339**<br>[1.062, 1.689]  | 0.012<br>[0.011, 0.012] |
| Roof: calamine/cement fiber      | 1.045**<br>[1.004, 1.088]  | 1.026<br>[0.982, 1.072]    | 1.024<br>[0.961, 1.090]    | 1.038***<br>[1.011, 1.066] | 1.028<br>[0.933, 1.133]   | 1.116***<br>[1.034, 1.204] | 1.063<br>[0.899, 1.258]    | 0.028<br>[0.027, 0.030] |
| Roof: asbestos sheets            | 0.985<br>[0.958, 1.013]    | 0.984<br>[0.956, 1.013]    | 0.972<br>[0.931, 1.014]    | 1.016*<br>[0.999, 1.034]   | 0.972<br>[0.910, 1.038]   | 1.085***<br>[1.032, 1.141] | 1.089<br>[0.977, 1.213]    | 0.076<br>[0.073, 0.078] |
| Roof: roofing shingles           | 0.974<br>[0.921, 1.029]    | 0.980<br>[0.927, 1.037]    | 1.012<br>[0.932, 1.097]    | 0.959**<br>[0.928, 0.992]  | 1.110<br>[0.962, 1.280]   | 0.989<br>[0.893, 1.096]    | 1.297**<br>[1.042, 1.615]  | 0.020<br>[0.019, 0.021] |
| Roof: tiles                      | 1.059***<br>[1.027, 1.093] | 1.030*<br>[0.996, 1.065]   | 1.023<br>[0.975, 1.073]    | 1.004<br>[0.984, 1.025]    | 1.045<br>[0.963, 1.133]   | 1.088***<br>[1.027, 1.152] | 1.224***<br>[1.072, 1.397] | 0.071<br>[0.068, 0.073] |
| Roof: slate                      | 1.003<br>[0.972, 1.035]    | 1.002<br>[0.969, 1.036]    | 0.984<br>[0.936, 1.035]    | 0.989<br>[0.970, 1.009]    | 0.916**<br>[0.848, 0.991] | 1.015<br>[0.958, 1.075]    | 1.183***<br>[1.050, 1.333] | 0.081<br>[0.079, 0.084] |
| Roof: burnt brick                | 1.034**<br>[1.001, 1.068]  | 1.014<br>[0.975, 1.053]    | 1.006<br>[0.945, 1.071]    | 0.994<br>[0.971, 1.018]    | 1.001<br>[0.923, 1.086]   | 1.050<br>[0.969, 1.137]    | 1.115*<br>[0.989, 1.258]   | 0.045<br>[0.043, 0.047] |
| Roof: thatch/palm leaf           | 1.004<br>[0.972, 1.037]    | 1.003<br>[0.969, 1.039]    | 1.001<br>[0.946, 1.060]    | 1.003<br>[0.980, 1.027]    | 0.986<br>[0.908, 1.071]   | 1.011<br>[0.941, 1.087]    | 1.096<br>[0.966, 1.242]    | 0.045<br>[0.043, 0.046] |
| Roof: other                      | 1.020<br>[0.964, 1.080]    | 1.089***<br>[1.024, 1.157] | 1.078<br>[0.983, 1.183]    | 0.984<br>[0.950, 1.020]    | 0.897*<br>[0.792, 1.017]  | 1.117*<br>[0.998, 1.251]   | 1.333***<br>[1.098, 1.619] | 0.029<br>[0.027, 0.031] |
| Roof: mud                        | 1.079**<br>[1.012, 1.151]  | 1.026<br>[0.957, 1.100]    | 0.916<br>[0.817, 1.028]    | 0.974<br>[0.929, 1.021]    | 1.042<br>[0.876, 1.239]   | 0.974<br>[0.849, 1.117]    | 1.018<br>[0.776, 1.337]    | 0.009<br>[0.008, 0.009] |
| Roof: sod/mud and grass mixture  | 1.052*<br>[0.999, 1.107]   | 0.997<br>[0.940, 1.056]    | 1.039<br>[0.945, 1.142]    | 1.033*<br>[0.994, 1.074]   | 1.002<br>[0.873, 1.149]   | 1.085<br>[0.951, 1.238]    | 0.981<br>[0.792, 1.214]    | 0.009<br>[0.009, 0.010] |
| Roof: plastic/polythene sheeting | 1.069**<br>[1.004, 1.138]  | 1.037<br>[0.968, 1.111]    | 1.148***<br>[1.039, 1.269] | 1.050**<br>[1.003, 1.098]  | 1.098<br>[0.925, 1.303]   | 1.204***<br>[1.052, 1.379] | 1.290*<br>[0.972, 1.713]   | 0.008<br>[0.007, 0.008] |
| Roof: rustic mat                 | 0.923<br>[0.783, 1.087]    | 0.889<br>[0.722, 1.095]    | 1.337**<br>[1.019, 1.753]  | 0.993<br>[0.871, 1.132]    | 1.040<br>[0.734, 1.474]   | 1.020<br>[0.668, 1.558]    | 0.662<br>[0.313, 1.399]    | 0.001<br>[0.001, 0.001] |
| Roof: palm/bamboo                | 1.019<br>[0.963, 1.079]    | 1.013<br>[0.951, 1.078]    | 1.049<br>[0.947, 1.162]    | 1.002<br>[0.962, 1.044]    | 1.080<br>[0.944, 1.236]   | 0.999<br>[0.869, 1.149]    | 1.324***<br>[1.071, 1.636] | 0.007<br>[0.007, 0.008] |

|                                |                            |                            |                            |                            |                            |                            |                           |                         |
|--------------------------------|----------------------------|----------------------------|----------------------------|----------------------------|----------------------------|----------------------------|---------------------------|-------------------------|
| Roof: raw wood planks/timber   | 1.030<br>[0.950, 1.118]    | 0.966<br>[0.882, 1.059]    | 1.130*<br>[0.988, 1.293]   | 1.022<br>[0.972, 1.075]    | 1.299***<br>[1.073, 1.572] | 0.939<br>[0.788, 1.119]    | 1.127<br>[0.768, 1.654]   | 0.006<br>[0.006, 0.007] |
| Roof: unburnt bricks           | 1.069*<br>[0.990, 1.153]   | 1.034<br>[0.947, 1.130]    | 1.058<br>[0.935, 1.198]    | 1.054*<br>[0.998, 1.113]   | 1.207**<br>[1.000, 1.457]  | 1.120<br>[0.964, 1.302]    | 1.212<br>[0.882, 1.667]   | 0.005<br>[0.005, 0.005] |
| Wall: cement/concrete          | RC                         | RC                         | RC                         | RC                         | RC                         | RC                         | RC                        | 0.379<br>[0.373, 0.385] |
| Wall: no walls                 | 1.118**<br>[1.007, 1.242]  | 1.169***<br>[1.045, 1.309] | 1.039<br>[0.865, 1.248]    | 0.966<br>[0.892, 1.045]    | 0.897<br>[0.690, 1.167]    | 0.728***<br>[0.583, 0.910] | 0.849<br>[0.487, 1.478]   | 0.003<br>[0.003, 0.004] |
| Wall: raw/reused wood          | 1.066<br>[0.863, 1.316]    | 0.974<br>[0.765, 1.240]    | 1.009<br>[0.712, 1.428]    | 1.042<br>[0.876, 1.238]    | 0.894<br>[0.533, 1.500]    | 1.274<br>[0.903, 1.799]    | 1.136<br>[0.449, 2.873]   | 0.003<br>[0.002, 0.003] |
| Wall: stone with lime/cement   | 1.008<br>[0.967, 1.051]    | 1.001<br>[0.959, 1.045]    | 1.065**<br>[1.007, 1.127]  | 1.046***<br>[1.020, 1.073] | 0.994<br>[0.893, 1.105]    | 1.089***<br>[1.022, 1.160] | 1.035<br>[0.880, 1.217]   | 0.059<br>[0.057, 0.061] |
| Wall: burnt bricks             | 1.024*<br>[1.000, 1.049]   | 1.016<br>[0.990, 1.043]    | 1.026<br>[0.988, 1.064]    | 1.011<br>[0.996, 1.027]    | 0.958<br>[0.908, 1.012]    | 1.035<br>[0.991, 1.081]    | 1.063<br>[0.972, 1.163]   | 0.252<br>[0.247, 0.257] |
| Wall: cement blocks            | 0.999<br>[0.963, 1.037]    | 1.015<br>[0.976, 1.055]    | 1.081***<br>[1.025, 1.139] | 0.996<br>[0.973, 1.020]    | 1.030<br>[0.949, 1.118]    | 1.085***<br>[1.024, 1.150] | 1.206**<br>[1.041, 1.396] | 0.058<br>[0.055, 0.060] |
| Wall: wood planks/shingles     | 0.961<br>[0.781, 1.183]    | 0.912<br>[0.715, 1.162]    | 0.881<br>[0.606, 1.280]    | 0.976<br>[0.846, 1.125]    | 1.038<br>[0.654, 1.649]    | 1.042<br>[0.722, 1.504]    | 1.270<br>[0.557, 2.900]   | 0.002<br>[0.002, 0.002] |
| Wall: GI/metal/asbestos sheets | 1.141***<br>[1.038, 1.255] | 0.975<br>[0.882, 1.078]    | 1.062<br>[0.924, 1.222]    | 1.073**<br>[1.004, 1.147]  | 1.455***<br>[1.142, 1.855] | 0.973<br>[0.839, 1.129]    | 1.690**<br>[1.090, 2.621] | 0.010<br>[0.009, 0.011] |
| Wall: other                    | 0.878<br>[0.745, 1.033]    | 0.989<br>[0.848, 1.154]    | 1.043<br>[0.848, 1.282]    | 1.009<br>[0.912, 1.116]    | 1.319<br>[0.919, 1.894]    | 0.971<br>[0.747, 1.261]    | 0.547<br>[0.231, 1.296]   | 0.002<br>[0.002, 0.002] |
| Wall: cane/palm/trunks         | 0.985<br>[0.928, 1.044]    | 1.032<br>[0.970, 1.098]    | 1.143***<br>[1.037, 1.260] | 1.008<br>[0.966, 1.052]    | 0.964<br>[0.824, 1.127]    | 1.059<br>[0.932, 1.203]    | 1.020<br>[0.815, 1.277]   | 0.016<br>[0.015, 0.017] |
| Wall: mud                      | 0.990<br>[0.961, 1.021]    | 1.000<br>[0.969, 1.032]    | 1.039<br>[0.991, 1.089]    | 1.046***<br>[1.025, 1.067] | 0.994<br>[0.922, 1.071]    | 1.070**<br>[1.010, 1.132]  | 1.080<br>[0.960, 1.216]   | 0.136<br>[0.132, 0.139] |
| Wall: grass/reeds/thatch       | 1.068**<br>[1.012, 1.126]  | 1.060*<br>[0.999, 1.124]   | 0.961<br>[0.869, 1.064]    | 0.997<br>[0.959, 1.037]    | 1.005<br>[0.884, 1.142]    | 1.178**<br>[1.030, 1.347]  | 1.074<br>[0.871, 1.325]   | 0.009<br>[0.008, 0.009] |
| Wall: bamboo with mud          | 1.050**<br>[1.001, 1.101]  | 1.057**<br>[1.006, 1.111]  | 1.043<br>[0.966, 1.125]    | 1.013<br>[0.979, 1.049]    | 0.988<br>[0.872, 1.120]    | 0.980<br>[0.876, 1.095]    | 1.188*<br>[0.986, 1.432]  | 0.028<br>[0.027, 0.029] |
| Wall: stone with mud           | 1.030<br>[0.974, 1.088]    | 1.051*<br>[0.993, 1.112]   | 1.130***<br>[1.040, 1.228] | 1.003<br>[0.968, 1.040]    | 0.923<br>[0.784, 1.087]    | 1.071<br>[0.969, 1.184]    | 1.170<br>[0.929, 1.472]   | 0.021<br>[0.020, 0.022] |
| Wall: plywood                  | 0.975<br>[0.718, 1.325]    | 0.836<br>[0.567, 1.233]    | 0.968<br>[0.576, 1.625]    | 1.157<br>[0.894, 1.498]    | 1.747<br>[0.771, 3.959]    | 1.144<br>[0.593, 2.210]    | 0.286<br>[0.020, 4.031]   | 0.001<br>[0.001, 0.001] |
| Wall: cardboard                | 1.064<br>[0.863, 1.313]    | 0.970<br>[0.780, 1.206]    | 0.939<br>[0.638, 1.383]    | 0.860<br>[0.717, 1.032]    | 0.685<br>[0.393, 1.195]    | 0.968<br>[0.662, 1.416]    | 0.872<br>[0.322, 2.366]   | 0.001<br>[0.001, 0.001] |

|                               |                            |                            |                            |                            |                            |                            |                            |                         |
|-------------------------------|----------------------------|----------------------------|----------------------------|----------------------------|----------------------------|----------------------------|----------------------------|-------------------------|
| Wall: unburnt brick           | 1.049**<br>[1.005, 1.096]  | 1.010<br>[0.963, 1.060]    | 0.984<br>[0.915, 1.058]    | 1.043***<br>[1.013, 1.073] | 0.908*<br>[0.809, 1.019]   | 0.983<br>[0.903, 1.070]    | 1.255**<br>[1.051, 1.500]  | 0.021<br>[0.020, 0.022] |
| <b>e) Other</b>               |                            |                            |                            |                            |                            |                            |                            |                         |
| Staff                         | 0.855<br>[0.543, 1.347]    | 0.958<br>[0.612, 1.501]    | 0.925<br>[0.547, 1.565]    | 0.971<br>[0.802, 1.175]    | 1.123<br>[0.615, 2.049]    | 0.947<br>[0.541, 1.655]    | 1.428<br>[0.630, 3.237]    | 0.002<br>[0.001, 0.002] |
| Bank account                  | 0.972***<br>[0.954, 0.991] | 0.987<br>[0.967, 1.007]    | 0.980<br>[0.950, 1.012]    | 0.988*<br>[0.975, 1.001]   | 1.088***<br>[1.035, 1.144] | 0.943***<br>[0.905, 0.982] | 0.970<br>[0.897, 1.050]    | 0.895<br>[0.893, 0.897] |
| Electricity                   | 0.991<br>[0.970, 1.014]    | 0.979*<br>[0.956, 1.003]   | 0.982<br>[0.944, 1.022]    | 0.995<br>[0.979, 1.012]    | 1.005<br>[0.948, 1.067]    | 0.998<br>[0.943, 1.055]    | 0.964<br>[0.882, 1.053]    | 0.882<br>[0.879, 0.885] |
| Animal-drawn cart             | 0.992<br>[0.958, 1.027]    | 1.027<br>[0.991, 1.065]    | 1.021<br>[0.969, 1.075]    | 1.014<br>[0.992, 1.036]    | 0.982<br>[0.906, 1.064]    | 1.004<br>[0.941, 1.071]    | 1.048<br>[0.919, 1.195]    | 0.036<br>[0.035, 0.037] |
| Land usable for agriculture   | 0.991<br>[0.976, 1.007]    | 0.957***<br>[0.941, 0.974] | 0.958***<br>[0.934, 0.983] | 0.977***<br>[0.967, 0.988] | 0.962**<br>[0.926, 1.000]  | 0.998<br>[0.967, 1.030]    | 0.962<br>[0.905, 1.022]    | 0.389<br>[0.384, 0.394] |
| Internet                      | 1.029<br>[0.989, 1.070]    | 0.977<br>[0.938, 1.019]    | 0.924***<br>[0.874, 0.976] | 1.002<br>[0.979, 1.026]    | 1.005<br>[0.931, 1.085]    | 0.947*<br>[0.893, 1.004]   | 0.972<br>[0.838, 1.128]    | 0.109<br>[0.106, 0.112] |
| Thresher                      | 1.028<br>[0.969, 1.091]    | 1.075**<br>[1.011, 1.144]  | 1.162***<br>[1.069, 1.262] | 0.989<br>[0.953, 1.026]    | 1.050<br>[0.932, 1.182]    | 1.020<br>[0.921, 1.129]    | 1.160<br>[0.943, 1.427]    | 0.015<br>[0.014, 0.015] |
| Tractor                       | 1.002<br>[0.955, 1.050]    | 0.976<br>[0.928, 1.026]    | 0.931**<br>[0.870, 0.996]  | 1.034**<br>[1.005, 1.063]  | 1.053<br>[0.953, 1.164]    | 0.993<br>[0.915, 1.078]    | 0.825**<br>[0.700, 0.972]  | 0.025<br>[0.024, 0.025] |
| Household member owns a house | 1.022**<br>[1.002, 1.042]  | 1.004<br>[0.983, 1.025]    | 1.001<br>[0.972, 1.031]    | 0.994<br>[0.982, 1.007]    | 1.022<br>[0.975, 1.071]    | 0.958**<br>[0.926, 0.992]  | 1.004<br>[0.931, 1.083]    | 0.798<br>[0.794, 0.803] |
| <b>Covariates</b>             |                            |                            |                            |                            |                            |                            |                            |                         |
| Birth interval (months)       | 0.997***<br>[0.997, 0.998] | 0.997***<br>[0.997, 0.998] | 0.999***<br>[0.999, 1.000] | 1.000***<br>[0.999, 1.000] | 1.000<br>[0.999, 1.001]    | 0.999**<br>[0.999, 1.000]  | 0.995***<br>[0.993, 0.997] |                         |
| Birth order                   | 1.075***<br>[1.060, 1.091] | 1.106***<br>[1.089, 1.123] | 1.107***<br>[1.078, 1.138] | 0.988**<br>[0.978, 0.999]  | 1.644***<br>[1.566, 1.726] | 0.972*<br>[0.943, 1.002]   | 0.408***<br>[0.388, 0.430] |                         |
| Age (months)                  | 1.009***<br>[1.008, 1.009] | 1.007***<br>[1.007, 1.008] | 0.990***<br>[0.989, 0.990] | 0.989***<br>[0.989, 0.989] | 0.982***<br>[0.981, 0.983] | 0.999***<br>[0.998, 1.000] | 0.981***<br>[0.979, 0.983] |                         |
| Female                        | 0.971***<br>[0.960, 0.983] | 0.981***<br>[0.969, 0.993] | 0.917***<br>[0.901, 0.935] | 1.002<br>[0.994, 1.010]    | 0.949***<br>[0.922, 0.977] | 1.144***<br>[1.120, 1.168] | 0.823***<br>[0.787, 0.860] |                         |
| First born                    | 0.854***<br>[0.835, 0.873] | 0.895***<br>[0.875, 0.917] | 0.990<br>[0.956, 1.026]    | 0.958***<br>[0.944, 0.973] | 1.020<br>[0.966, 1.077]    | 1.119***<br>[1.074, 1.166] | 1.105**<br>[1.016, 1.202]  |                         |
| Delivered at home             | 1.002<br>[0.987, 1.018]    | 1.041***<br>[1.023, 1.058] | 1.040***<br>[1.011, 1.070] | 1.004<br>[0.993, 1.016]    | 0.942***<br>[0.904, 0.982] | 1.184***<br>[1.130, 1.240] | 1.141***<br>[1.073, 1.213] |                         |
| Mother's age at birth (years) | 0.960***<br>[0.950, 0.969] | 0.970***<br>[0.960, 0.981] | 0.988<br>[0.972, 1.004]    | 0.996<br>[0.989, 1.003]    | 0.978*<br>[0.953, 1.004]   | 0.963***<br>[0.944, 0.982] | 0.920***<br>[0.887, 0.955] |                         |

|                                       |                            |                            |                            |                            |                            |                            |                            |
|---------------------------------------|----------------------------|----------------------------|----------------------------|----------------------------|----------------------------|----------------------------|----------------------------|
| Mother's age at birth (years) squared | 1.001***<br>[1.000, 1.001] | 1.000***<br>[1.000, 1.001] | 1.000*<br>[1.000, 1.001]   | 1.000<br>[1.000, 1.000]    | 1.000<br>[1.000, 1.001]    | 1.001***<br>[1.000, 1.001] | 1.002***<br>[1.001, 1.002] |
| Maternal height (z-score)             | 0.814***<br>[0.808, 0.820] | 0.823***<br>[0.817, 0.830] | 0.961***<br>[0.950, 0.971] | 0.990***<br>[0.985, 0.994] | 1.029***<br>[1.012, 1.045] | 0.870***<br>[0.858, 0.881] | 0.909***<br>[0.884, 0.934] |
| Received no vaccination               | 0.943***<br>[0.920, 0.966] | 0.960***<br>[0.935, 0.985] | 1.033<br>[0.992, 1.075]    | 1.017*<br>[0.999, 1.034]   | 0.880***<br>[0.825, 0.938] |                            |                            |
| Siblings ever born                    | 0.941***<br>[0.928, 0.954] | 0.917***<br>[0.903, 0.930] | 0.904***<br>[0.881, 0.927] | 1.021***<br>[1.011, 1.031] | 0.598***<br>[0.570, 0.627] | 0.991<br>[0.964, 1.019]    | 3.026***<br>[2.884, 3.175] |
| Mother's education: none              | RC                         |
| Mother's education: primary           | 0.974***<br>[0.956, 0.993] | 0.967***<br>[0.947, 0.987] | 0.956***<br>[0.924, 0.988] | 0.982***<br>[0.969, 0.995] | 1.102***<br>[1.050, 1.158] | 1.018<br>[0.977, 1.061]    | 1.057<br>[0.979, 1.142]    |
| Mother's education: secondary         | 0.910***<br>[0.894, 0.927] | 0.916***<br>[0.898, 0.934] | 0.952***<br>[0.924, 0.981] | 0.957***<br>[0.945, 0.968] | 1.064***<br>[1.017, 1.114] | 0.924***<br>[0.891, 0.959] | 0.922**<br>[0.858, 0.992]  |
| Mother's education: higher            | 0.781***<br>[0.753, 0.811] | 0.776***<br>[0.746, 0.807] | 0.895***<br>[0.852, 0.939] | 0.908***<br>[0.889, 0.928] | 0.967<br>[0.900, 1.040]    | 0.808***<br>[0.763, 0.855] | 0.862**<br>[0.751, 0.990]  |
| Wealth quintile: first                | RC                         |
| Wealth quintile: second               | 1.013<br>[0.985, 1.041]    | 0.997<br>[0.967, 1.028]    | 0.990<br>[0.944, 1.039]    | 1.015<br>[0.995, 1.036]    | 1.018<br>[0.947, 1.094]    | 1.059*<br>[0.997, 1.126]   | 1.079<br>[0.966, 1.206]    |
| Wealth quintile: third                | 0.988<br>[0.942, 1.036]    | 0.944**<br>[0.897, 0.993]  | 1.000<br>[0.926, 1.080]    | 1.035**<br>[1.002, 1.069]  | 1.029<br>[0.916, 1.156]    | 1.113**<br>[1.012, 1.224]  | 1.219**<br>[1.010, 1.472]  |
| Wealth quintile: fourth               | 0.949<br>[0.886, 1.015]    | 0.931*<br>[0.866, 1.002]   | 1.010<br>[0.907, 1.124]    | 1.006<br>[0.962, 1.052]    | 1.004<br>[0.854, 1.181]    | 1.259***<br>[1.109, 1.430] | 1.301*<br>[0.996, 1.699]   |
| Wealth quintile: fifth                | 0.909**<br>[0.829, 0.997]  | 0.870***<br>[0.788, 0.960] | 1.035<br>[0.902, 1.189]    | 1.033<br>[0.975, 1.095]    | 0.951<br>[0.771, 1.172]    | 1.227**<br>[1.044, 1.441]  | 1.409*<br>[0.981, 2.022]   |
| Caste/tribe: schedule caste           | RC                         |
| Caste/tribe: schedule tribe           | 0.995<br>[0.963, 1.029]    | 1.026<br>[0.992, 1.061]    | 1.043*<br>[0.992, 1.096]   | 1.047***<br>[1.024, 1.070] | 0.822***<br>[0.756, 0.895] | 1.045<br>[0.984, 1.110]    | 0.861**<br>[0.754, 0.983]  |
| Caste/tribe: other backward class     | 0.959***<br>[0.942, 0.975] | 0.967***<br>[0.949, 0.986] | 0.999<br>[0.970, 1.029]    | 0.970***<br>[0.958, 0.981] | 0.902***<br>[0.864, 0.942] | 0.979<br>[0.945, 1.014]    | 0.940*<br>[0.877, 1.008]   |
| Caste/tribe: none of them             | 0.896***<br>[0.875, 0.918] | 0.911***<br>[0.888, 0.935] | 0.957**<br>[0.922, 0.993]  | 0.977***<br>[0.962, 0.993] | 0.907***<br>[0.858, 0.958] | 0.991<br>[0.949, 1.034]    | 0.957<br>[0.875, 1.047]    |
| Caste/tribe: don't know               | 0.921**<br>[0.858, 0.988]  | 0.992<br>[0.920, 1.069]    | 1.082<br>[0.976, 1.200]    | 1.096***<br>[1.048, 1.146] | 0.972<br>[0.826, 1.145]    | 1.119**<br>[1.002, 1.251]  | 0.748*<br>[0.553, 1.012]   |

| Singleton birth              | RC             |         |
|------------------------------|----------------|----------------|----------------|----------------|----------------|----------------|----------------|---------|
| First born twin/triplet etc. | 1.229***       | 1.379***       | 1.253***       | 1.041*         | 1.083          | 3.870***       | 1.285***       |         |
|                              | [1.154, 1.308] | [1.296, 1.468] | [1.132, 1.386] | [0.998, 1.087] | [0.892, 1.315] | [3.601, 4.158] | [1.110, 1.486] |         |
| Later born twin/triplet etc. | 1.169***       | 1.347***       | 1.215***       | 1.065***       | 0.953          | 4.242***       | 5.327***       |         |
|                              | [1.097, 1.246] | [1.267, 1.433] | [1.102, 1.340] | [1.019, 1.112] | [0.806, 1.126] | [3.953, 4.553] | [4.646, 6.108] |         |
| Observations                 | 185,529        | 179,341        | 157,464        | 181,977        | 110,384        | 118,263        | 86,172         | 601,509 |

Notes: \*\*\* p<0.01, \*\* p<0.05, \* p<0.1. Prevalence ratios are shown. All estimates were weighted and tests for statistical significance and 95% confidence intervals (shown in brackets) were calculated using robust standard errors. All estimates in each column were obtained from a single model. Control variables: sex, age, maternal age at birth, birth order, birth interval, firstborn, twin, vaccination status (except for mortality and low birth weight), born at home, maternal education, caste/tribe, and wealth index quintiles. Models were further adjusted for unobserved PSU-level factors. Proportions are for all households interviewed. Acronyms and abbreviations: liquefied petroleum gas (LPG), reinforced cement concrete (RCC), reinforced brick concrete (RBC), galvanized iron (GI), granite (grani.), shared (sh.), sewer system (sewer s.), without (w/o), with(w/), reverse osmosis (RO), reference category (RC).
